# Supplementary material for: Diversity analysis of the rhizospheric and endophytic bacterial communities of Senecio vulgaris L. (Asteraceae) in an invasive range
Source: PeerJ. 2019 Jan 7;6:e6162. doi: 10.7717/peerj.6162 (PMC6327885; doi:10.7717/peerj.6162)
Supplement: Supplemental Information 13 — This dataset shows abundance percentage of each OTU in each sample. The rows are OTUs and the variables are samples. See explanations for them in the dataset “Sample name”. The OTUs matching chloroplasts, mitochondrial or Viridiplantae were not in this dataset. [file peerj-07-6162-s013.xlsx]

## Sheet: kept otus
otu.num1	otu.num2	phylum	class	order	family	genus	species	L1b	L1c	L1d	L1e	L1f	L2a	L2b	L2c	L2d	L2e	L3a	L3b	L3c	L3d	L3e	L4a	L4b	L4c	L4d	R1b	R1c	R1d	R1e	R1f	R2a	R2b	R2c	R2d	R2e	R3a	R3b	R3c	R3d	R3e	R4a	R4b	R4c	R4d	RS1b	RS1c	RS1d	RS1e
OTU_18	18	Proteobacteria	Betaproteobacteria	Burkholderiales	Comamonadaceae	Variovorax	Variovorax_paradoxus	0	0	0.000639437	0	0.000639437	0.00247782	0.00375669	0.00743346	0.0439613	0.0218208	0.00351691	0.0051155	0.00903205	0.000719367	0.00399648	0.0362881	0.000239789	0.00503557	0.00319719	0.00831268	0.00399648	0.00375669	0.000399648	0.00359683	0.0200623	0.00751339	0.00679402	0.0120694	0.00655423	0.00327712	0.00791304	0.00623451	0.00983135	0.00327712	0.00479578	0.00679402	0.00391655	0.0021581	0.0328511	0.025018	0.0299736	0.0328511
OTU_16	16	Bacteroidetes	Flavobacteriia	Flavobacteriales	Flavobacteriaceae	Flavobacterium	Flavobacterium_pectinovorum	0	0	0	0	7.99297e-05	7.99297e-05	0	0.00247782	0.00575494	0.00767325	0.00239789	0.0043162	0.0100711	0.00191831	0.00455599	0.00871233	0.000799297	0.00343698	0.00199824	0.0379666	0.0115898	0.000639437	0.0186236	0.0262969	0.0296539	0.10183	0.0342099	0.0509951	0.0145472	0.0628247	0.028375	0.0683399	0.0756135	0.0198226	0.10255	0.000799297	0.0467589	0.0841659	0.0276557	0.0342099	0.0581888	0.0148669
OTU_2051	2051	Bacteroidetes	Flavobacteriia	Flavobacteriales	Flavobacteriaceae	Flavobacterium		0	0	0	0	0	0	0.00479578	0	0.00127887	7.99297e-05	0.00167852	0.00255775	0.00399648	0.00127887	0.00399648	0.00503557	0.000399648	0.00319719	0.00127887	0.0264567	0.0187835	0.000159859	0.00311726	0.00983135	0.0234993	0.0138278	0.00775318	0.0235793	0.0216609	0.0167053	0.00439613	0.038686	0.0353289	0.0221405	0.0301335	0.000399648	0.0525937	0.00535529	0.0280553	0.0809687	0.0617057	0.0178243
OTU_186	186	Proteobacteria	Alphaproteobacteria	Sphingomonadales	Sphingomonadaceae	Sphingomonas		0	7.99297e-05	0	0.00143873	0	0	0	0	0	0	7.99297e-05	0.000239789	0.00111902	0.00159859	0.00335705	0.000399648	7.99297e-05	0.000399648	0.000239789	7.99297e-05	0.000399648	7.99297e-05	0	0.000159859	0.000159859	0.000479578	0.000399648	0.000479578	0.000639437	7.99297e-05	0.000319719	0	0.000879226	0.000239789	7.99297e-05	0.000159859	0.000959156	0.00119894	0.0160659	0.0171049	0.0179842	0.0408441
OTU_885	885	Bacteroidetes	Flavobacteriia	Flavobacteriales	Flavobacteriaceae	Flavobacterium		0	0	0	0	0	0	7.99297e-05	0.000399648	0.00327712	0	0.000319719	0.000799297	0.00127887	0.000399648	0.00151866	0.000879226	7.99297e-05	0.000799297	0.000719367	0.00783311	0.00463592	0.00127887	0.00199824	0.00255775	0.00719367	0.0117497	0.00263768	0.0064743	0.0101511	0.00151866	0.00855247	0.0394853	0.0524339	0.0314923	0.0183039	0.000319719	0.0110303	0.0356486	0.00311726	0.00679402	0.0086324	0.00271761
OTU_351	351	Proteobacteria	Betaproteobacteria	Burkholderiales	Comamonadaceae	Acidovorax		0	0	0	0	0	0	0.00151866	0.00287747	0.000159859	7.99297e-05	0.0706578	0.00279754	0.00487571	0.00919191	0.000959156	0.00303733	0.000159859	0.00575494	0.00111902	0.00247782	0.00751339	0.00383662	0.019343	0.0146271	0.00495564	0.00871233	0.00551515	0.00247782	0.00119894	0.00199824	0.00423627	0.00487571	0.00151866	0.00287747	0.00487571	0.00111902	0.00183838	0.0111102	0.00247782	0.00623451	0.00311726	0.00815283
OTU_2733	2733	Proteobacteria	Betaproteobacteria	Burkholderiales	Oxalobacteraceae	Massilia		7.99297e-05	0.0094317	0	7.99297e-05	0.00903205	0.000879226	0.000239789	0.00159859	0.00783311	0.000239789	0.00103909	0.000879226	0.00127887	0.000639437	0.000879226	0.00271761	0.000319719	0.000719367	0.000319719	0.00679402	0.00935177	0.0282152	0.000639437	0.00975142	0.00967149	0.00271761	0.00671409	0.00991128	0.00679402	0.00591479	0.00367676	0.00311726	0.00855247	0.00543522	0.00759332	0.00735353	0.00663416	0.0101511	0.0127887	0.0155064	0.00831268	0.013668
OTU_21	21	Proteobacteria	Betaproteobacteria	Methylophilales	Methylophilaceae	Methylotenera		0	0	0	0	0	0	0	0	0	0	0.000159859	0.000799297	0.000479578	0	0.000399648	0.000239789	0	0.000559508	7.99297e-05	0.00327712	0.000399648	0.00271761	0.000879226	0.00127887	0.00415634	0.00527536	0.000239789	0.00143873	0.00143873	0.000559508	0.00735353	0.00463592	0.00719367	0.0132683	0.00687395	7.99297e-05	0.00463592	0.014787	0.00751339	0.00303733	0.00759332	0.0128687
OTU_471	471	Proteobacteria	Alphaproteobacteria	Sphingomonadales	Sphingomonadaceae	Sphingomonas		0	0.00167852	0	0	0	0	0	0	0	0	0	0	0.000159859	7.99297e-05	0.000559508	0.000159859	0	0	7.99297e-05	0	7.99297e-05	0	0	7.99297e-05	0.000159859	7.99297e-05	0.000159859	0.000239789	7.99297e-05	7.99297e-05	7.99297e-05	0	0.000319719	0	0.000159859	0	0.000319719	0.000399648	0.0072736	0.0051155	0.00391655	0.0103109
OTU_853	853	Proteobacteria	Alphaproteobacteria	Sphingomonadales	Sphingomonadaceae	Sphingomonas		0	0	0	0	0	0	0	0	0	0	0.000159859	0.000159859	0.00191831	0.000159859	0.000879226	0.000319719	0.000159859	0.000319719	7.99297e-05	0	0.000639437	7.99297e-05	0	0.000239789	7.99297e-05	0.000239789	0.000559508	0.000319719	0.000159859	0.000159859	0.000159859	0	7.99297e-05	0.000319719	0.000159859	0	0.000239789	0.000639437	0.00975142	0.00935177	0.00759332	0.0175845
OTU_1230	1230	Proteobacteria	Betaproteobacteria	Burkholderiales	Comamonadaceae	Caenimonas		0	0	0	0	0.00263768	0	0	0	0.00119894	0	0.00119894	0.00103909	0.00119894	0.000159859	0.000239789	0.00391655	0	0.000319719	0.000239789	0.000719367	0.000239789	0.00111902	7.99297e-05	0.000399648	0.00439613	0.000719367	0.000399648	0.00111902	0.000959156	7.99297e-05	0.00279754	0.00663416	0.00575494	0.00127887	0.00255775	0.00799297	0.00319719	0.000879226	0.00671409	0.00663416	0.00343698	0.00639437
OTU_25	25	Bacteroidetes	Flavobacteriia	Flavobacteriales	Flavobacteriaceae	Flavobacterium		0	0	0	0	0	0	0	0	0	0	7.99297e-05	0.000399648	7.99297e-05	0.000159859	0.000639437	7.99297e-05	0	0.000719367	7.99297e-05	0.000639437	0	0	0	0.000159859	0.000319719	0.000159859	0.000239789	0.000479578	0	0	0.000879226	0.000239789	0.000719367	0.00119894	0.000159859	0	0.000239789	0.0277356	0.00151866	0.0029574	0.0029574	0.00399648
OTU_2661	2661	Proteobacteria	Betaproteobacteria	Burkholderiales	Comamonadaceae	Polaromonas		0	0	0	0	0	0	0	0	0	0	0.000159859	0.000479578	0.000479578	0.000159859	0.000319719	0.000879226	0.000159859	0.000159859	0.000159859	0.00391655	0.00551515	0.00343698	7.99297e-05	0.00127887	0.0109504	0.00455599	0.0029574	0.00343698	0.00471585	0.00343698	0.00151866	0.00367676	0.0122292	0.00783311	0.00303733	0.000159859	0.00167852	0.00759332	0.0043162	0.00591479	0.00175845	0.0086324
OTU_183	183	Proteobacteria	Betaproteobacteria	Rhodocyclales	Rhodocyclaceae	Dechloromonas		0	0	0	0	0	0	0	0	0	0	0	0	0	0	0	0	0	0	7.99297e-05	0	0	0	0	0	0	0	0	0	0	0	0	0	7.99297e-05	0	0	0	0	0	0.000159859	0	0.000399648	0
OTU_679	679	Bacteroidetes	Flavobacteriia	Flavobacteriales	Flavobacteriaceae	Flavobacterium		0	0	0	0	0	0	0	0.00263768	0.00479578	0	0	0.000319719	0.000399648	7.99297e-05	0.000959156	0.000239789	0	0.00575494	0.000879226	0.000159859	0	0	0.000319719	0.000239789	0.000319719	0.000479578	7.99297e-05	0.000399648	0.000239789	0	0.000159859	0.00783311	0.0013588	0.000239789	0.000159859	0	0.00175845	0.000399648	0.00391655	0.00223803	0.00335705	0.00383662
OTU_70	70	Proteobacteria	Betaproteobacteria	Burkholderiales	Comamonadaceae	Aquabacterium		0	0	0	0	0	0	0	0	0	7.99297e-05	0.00471585	0.0190233	0.000239789	0.0013588	0.00655423	0.00127887	7.99297e-05	0.00503557	0.00271761	0.000239789	0.000159859	7.99297e-05	0	0.000319719	0.000319719	7.99297e-05	0.000319719	0.000319719	0.000239789	0	0.000159859	7.99297e-05	7.99297e-05	0	0.000159859	0.000239789	0.000239789	0.000559508	0.00367676	0.00271761	0.00463592	0.00455599
OTU_88	88	Proteobacteria	Alphaproteobacteria	Sphingomonadales	Sphingomonadaceae	Sphingomonas	Sphingomonas_astaxanthinifaciens	0	0	0	0.000239789	0	0	0	0	0	0	0	0.00335705	7.99297e-05	0.00191831	0.000319719	0	7.99297e-05	0	0.000479578	0.000399648	0	0	0	0	0	0.000159859	0.000239789	0.000159859	0	7.99297e-05	0	7.99297e-05	0.000159859	0.000319719	0	7.99297e-05	0.000399648	7.99297e-05	0.000959156	0.00159859	0.000479578	0.000959156
OTU_2509	2509	Bacteroidetes	Flavobacteriia	Flavobacteriales	Flavobacteriaceae	Flavobacterium		0	0	0	0	0	0	0	0	0	0	7.99297e-05	0.000639437	0.000159859	0.000159859	0.000239789	7.99297e-05	0	7.99297e-05	0.000159859	0.000719367	0	0	0.000159859	0.000719367	0.000479578	0.000239789	0.000399648	0.000879226	0.000799297	0	0.000319719	0.00223803	0.000719367	0.00407641	7.99297e-05	0	0.000239789	0.00375669	0.00255775	0.00175845	0.00191831	0.00311726
OTU_41	41	Proteobacteria	Betaproteobacteria	Nitrosomonadales	Nitrosomonadaceae			0	0	0	0	0	0	0.00151866	0	0	0	0	7.99297e-05	0.000399648	0	0.000559508	0.000159859	7.99297e-05	0.000239789	0.000159859	0	7.99297e-05	0	0	0.000239789	0.000159859	0.000479578	0.000239789	0.000239789	0.000159859	7.99297e-05	0.000319719	7.99297e-05	0.000239789	7.99297e-05	0.000239789	7.99297e-05	0.000319719	0.000719367	0.0152666	0.0146271	0.019343	0.0183838
OTU_368	368	Proteobacteria	Betaproteobacteria	Nitrosomonadales	Nitrosomonadaceae	unidentified_Nitrosomonadaceae		0	0	0	0	0	0	0	0	0	0	0	0.000159859	0.000159859	0.000799297	0.000159859	0.000239789	0	7.99297e-05	7.99297e-05	0.000239789	7.99297e-05	0	0	0	7.99297e-05	0.000239789	0.000159859	7.99297e-05	0.000319719	0	0	0	0.000239789	0	0	0	0.000319719	0.000319719	0.00767325	0.00695388	0.00935177	0.0080729
OTU_1671	1671	Proteobacteria	Betaproteobacteria	Burkholderiales	Comamonadaceae			0.000159859	0	0.000239789	0	0	0	0	7.99297e-05	0	0.000319719	0.000159859	0.000239789	0.000399648	0.000319719	0.000319719	0.000239789	7.99297e-05	0.000399648	7.99297e-05	0.0072736	0.0159859	0.00207817	7.99297e-05	0.000159859	0.0021581	0.000159859	0.000159859	0.00103909	0	7.99297e-05	0.00407641	0.000319719	0.000479578	0.000879226	0.000319719	0	0.000399648	0.00615458	0.00319719	0.00279754	0.00303733	0.00367676
OTU_23	23	Proteobacteria	Betaproteobacteria	Burkholderiales	Oxalobacteraceae	Massilia		0	0.00495564	0	0	0.000399648	0.00199824	0.000399648	0.00111902	0.0195828	0.00551515	0.00159859	0.00127887	0.00223803	0.000879226	0.00255775	0.00575494	0.000159859	0.000399648	0.00599472	0.00191831	0.00239789	0.00559508	0	0.00191831	0.00311726	0.0013588	0.00199824	0.00375669	0.00127887	0.00103909	0.0021581	0.00151866	0.00319719	0.00191831	0.0021581	0.00319719	0.00223803	0.000719367	0.013588	0.00767325	0.00391655	0.00423627
OTU_55	55	Proteobacteria	Alphaproteobacteria	Sphingomonadales	Sphingomonadaceae	Sphingopyxis		0	0	0	0	0	0	0	0	0	0	0.000159859	7.99297e-05	7.99297e-05	7.99297e-05	0.000159859	0	7.99297e-05	7.99297e-05	0.000159859	0	0	0.000479578	7.99297e-05	0.000159859	0.000159859	7.99297e-05	7.99297e-05	0.000159859	0	0	7.99297e-05	0.000239789	0.000239789	0.00151866	0	0	0.000399648	0.000159859	0.00143873	0.000159859	0.00167852	0.00423627
OTU_8	8	Bacteroidetes	Flavobacteriia	Flavobacteriales	Flavobacteriaceae	Chryseobacterium	Chryseobacterium_shigense	0.202302	0.0929582	0.0786508	0.00983135	0.101351	0.000399648	0.00639437	0.00103909	0.00655423	0.000159859	0.00303733	0.00303733	0.00471585	0.0013588	0.00223803	0.0029574	0.000319719	0.00271761	0.00335705	0.0147071	0.00839261	0.00159859	0.129326	0.0652226	0.018224	0.0254976	0.0207018	0.00559508	0.00183838	0.00167852	0.00191831	0.0112701	0.00407641	0.0021581	0.00679402	0.00311726	0.00823276	0.00191831	0.00191831	0.00255775	0.0013588	0.00151866
OTU_161	161	Proteobacteria	Gammaproteobacteria	Xanthomonadales	Xanthomonadaceae			0	0	0	0	0	0	0	0	0	0	0	7.99297e-05	0	0	7.99297e-05	0	7.99297e-05	7.99297e-05	0	0	0	0	0	7.99297e-05	0	7.99297e-05	0	0	0	0	7.99297e-05	0	0.000159859	0	0	0	7.99297e-05	0.000159859	0.00119894	0.00127887	0.00239789	0.00471585
OTU_139	139	Proteobacteria	Gammaproteobacteria	Xanthomonadales	Xanthomonadaceae	Arenimonas		0	0	0	0	0	0	0	0	0	0	7.99297e-05	0	7.99297e-05	7.99297e-05	0.000399648	0.000959156	0	7.99297e-05	7.99297e-05	0	0	0	7.99297e-05	0	7.99297e-05	7.99297e-05	0	0.000159859	7.99297e-05	0	0	7.99297e-05	7.99297e-05	0.000399648	0.000159859	0	0	0.000159859	7.99297e-05	7.99297e-05	0.000719367	0.000399648
OTU_353	353	Proteobacteria	Betaproteobacteria	Rhodocyclales	Rhodocyclaceae	Thauera		0	0	0	0	0	0	0	0	0	0	0	0	0	0	0	0	0	0	0	0	0	0	0	0	0	0	0	0	0	0	0	0	0	0	0	0	0	0	0	0	0	0
OTU_47	47	Proteobacteria	Alphaproteobacteria	Sphingomonadales	Sphingomonadaceae	Sphingomonas	Sphingomonas_sp._TPD18	0	0	0	0	0	0	0.000479578	0	0	0	7.99297e-05	7.99297e-05	0.000239789	0.000399648	0.000479578	0.000159859	0	0.000239789	0.000159859	0.000239789	7.99297e-05	0	0	7.99297e-05	0	0.000159859	0	0.000239789	7.99297e-05	7.99297e-05	0	0	0.000159859	7.99297e-05	0	0	0.000239789	0.000319719	0.00927184	0.00791304	0.00879226	0.00975142
OTU_434	434	Bacteroidetes	Flavobacteriia	Flavobacteriales	Flavobacteriaceae	Flavobacterium		0	0	0	0	0	0	0	7.99297e-05	0	0	7.99297e-05	0.000159859	0.000239789	0	0.000399648	0.000239789	0	0.000319719	0.000239789	0	0	0	0	7.99297e-05	0.000559508	0.000159859	7.99297e-05	0.000559508	0.000159859	0	0.00487571	7.99297e-05	0.000959156	7.99297e-05	0.00151866	0	0.000319719	0.000399648	0.00479578	0.00255775	0.0100711	0.00311726
OTU_299	299	Proteobacteria	Betaproteobacteria	Hydrogenophilales	Hydrogenophilaceae	Thiobacillus		0	0	0	0	0	0	0	0	0	0	0	0	0	0	0.000159859	7.99297e-05	0	0	0	0	0	0	0	0	0	0	0	0	0	0	0	0	0.000159859	0	0	0	0	7.99297e-05	0	0	0	7.99297e-05
OTU_981	981	Proteobacteria	Alphaproteobacteria	Caulobacterales	Caulobacteraceae	Brevundimonas		7.99297e-05	0.000479578	0	0	7.99297e-05	7.99297e-05	7.99297e-05	0	0.000239789	0	0	0.000799297	0.000879226	0	0.000159859	0.0013588	0	0.000239789	7.99297e-05	0.000479578	0.00111902	0.000639437	0.000159859	0.000159859	0.000399648	0.00151866	7.99297e-05	0.000239789	7.99297e-05	7.99297e-05	7.99297e-05	0.000319719	7.99297e-05	0.000159859	0.000559508	0.000239789	7.99297e-05	0.00199824	0.00143873	0.00255775	0.00167852	0.00255775
OTU_165	165	Proteobacteria	Gammaproteobacteria	Xanthomonadales	Xanthomonadaceae			0	0	0.0111102	0	0	0	0.00367676	0	0	0	0.000239789	0	0.000159859	7.99297e-05	0.000399648	0	0	0.000239789	7.99297e-05	0	0.000159859	7.99297e-05	0.000159859	7.99297e-05	0.000319719	0	7.99297e-05	0.000399648	0.000479578	0	7.99297e-05	0.00159859	0.000239789	0.000399648	7.99297e-05	0	7.99297e-05	0.000239789	0.000479578	0.000319719	0.000559508	0.00119894
OTU_129	129	Bacteroidetes	Sphingobacteriia	Sphingobacteriales	Saprospiraceae			0	0	0	0	0	0	0	0	0	0	0.000159859	7.99297e-05	0.000159859	0	0.000159859	7.99297e-05	0	7.99297e-05	7.99297e-05	0	0	0	0	7.99297e-05	7.99297e-05	7.99297e-05	0.000159859	0.000239789	0.000159859	0.000159859	0	0	0.000239789	0	0	7.99297e-05	0.000159859	0.000159859	0.00143873	0.000879226	0.000879226	0.0021581
OTU_316	316	Proteobacteria	Betaproteobacteria	Burkholderiales	Comamonadaceae			0	0	0	0	0	0	0	0	0	0	0	7.99297e-05	0	7.99297e-05	0.000159859	0	0	0	0	0	0.000959156	0.000159859	0	7.99297e-05	7.99297e-05	0.000159859	0	0.000879226	0.000159859	7.99297e-05	0	0	7.99297e-05	0	7.99297e-05	0	0.000159859	0.000399648	0.000959156	0.00103909	0.00143873	0.00127887
OTU_87	87	Proteobacteria	Alphaproteobacteria	Sphingomonadales	Sphingomonadaceae	Sphingomonas	Sphingomonas_sp._RHLT1-7	0	0	0	0	0	0	0	0	0	0	0.000159859	0	7.99297e-05	7.99297e-05	7.99297e-05	7.99297e-05	7.99297e-05	0	0.000159859	7.99297e-05	7.99297e-05	0	0	0.000239789	0.000319719	0	7.99297e-05	7.99297e-05	7.99297e-05	0	0	0	0.000159859	7.99297e-05	0	0	0.000159859	0.000159859	0.00271761	0.00239789	0.00111902	0.00319719
OTU_346	346	Proteobacteria	Betaproteobacteria	Rhodocyclales	Rhodocyclaceae	Azoarcus	Azoarcus_sp.	0	0	0	0	0	0	0	0	0	0	0	0	0	0	0	0	0	0	0	0	0	0	0	0	0	0	0	0	0	0	0	0	7.99297e-05	0	0	0	0	0	0	0	0	0
OTU_97	97	Proteobacteria	Gammaproteobacteria	Xanthomonadales	Xanthomonadaceae	Arenimonas		0	0	0	0	0	0	0	0	0	0	0	7.99297e-05	7.99297e-05	0	0.000239789	0	0	0	0	0	0	7.99297e-05	0	0	7.99297e-05	0.000159859	7.99297e-05	0.000159859	0	0	0	7.99297e-05	7.99297e-05	0.000319719	0	0	0.000159859	0.000239789	0.00143873	0.00167852	0.00359683	0.00527536
OTU_3	3	Proteobacteria	Betaproteobacteria	Burkholderiales	Oxalobacteraceae			7.99297e-05	0.0175845	0.000559508	0.00415634	0.00559508	0.043162	0.00543522	0.00471585	0.015906	0.0051155	0.0617856	0.0163856	0.00655423	0.00399648	0.013588	0.0235793	0.00287747	0.00527536	0.00351691	0.0963952	0.153545	0.415634	0.00535529	0.0595476	0.114619	0.0637039	0.158501	0.183359	0.059068	0.337143	0.0653025	0.0416434	0.211014	0.0600272	0.415794	0.508273	0.347694	0.0258173	0.00959156	0.0109504	0.00399648	0.00839261
OTU_7	7	Proteobacteria	Gammaproteobacteria	Pseudomonadales	Pseudomonadaceae	Pseudomonas		0.0133483	0.0158261	7.99297e-05	0.00519543	0.0538726	0.182959	0.0561906	0.0254176	0.0184638	0.0661018	0.0219007	0.0625849	0.0350891	0.305491	0.0224602	0.0461993	0.0370074	0.0380465	0.0131085	0.154584	0.0723363	0.0645832	0.0186236	0.0438015	0.0660219	0.0805691	0.0322916	0.0710575	0.372792	0.0577891	0.021581	0.247222	0.0706578	0.0446008	0.0306131	0.0796899	0.264807	0.0700983	0.00815283	0.00783311	0.0222204	0.00927184
OTU_39	39	Proteobacteria	Betaproteobacteria	Burkholderiales	Comamonadaceae			0	0	0	0	0	0	0	0	0.00463592	0	0.00175845	0.00471585	0.000639437	0.000639437	0.00143873	0.00159859	0	0.00375669	0.000239789	0.0129486	0.00543522	0.0123092	0.000399648	0.00591479	0.00471585	0.00279754	0.00783311	0.0155064	0.00983135	0.000399648	0.000399648	0.00263768	0.00719367	0.00167852	0.000719367	0.000239789	0.00711374	0.00671409	0.00903205	0.00895212	0.00623451	0.010231
OTU_2087	2087	Proteobacteria	Gammaproteobacteria	Xanthomonadales	Xanthomonadaceae	Arenimonas		0	0	0	0	0	0	0	0	0	0	0	0	0	7.99297e-05	7.99297e-05	7.99297e-05	0	0.000159859	0	0	0	0	0	0	7.99297e-05	0	0	0.000399648	0.000399648	0	7.99297e-05	0	0.000159859	0	0	0	0.000159859	0.000239789	0.00103909	0.0013588	0.00159859	0.00343698
OTU_3060	3060	Proteobacteria	Betaproteobacteria	Burkholderiales	Comamonadaceae			0	0	0	0	0	0.00439613	0	0.000479578	0.00399648	0	0	0.000639437	0.00199824	7.99297e-05	0.000719367	0.00183838	0	0	0.00103909	0.00399648	0.00263768	0.000799297	0	0.000319719	0.00151866	0.00335705	0.00263768	0.00271761	0.00223803	7.99297e-05	0.00191831	0.00111902	0.000719367	0.000479578	0.000399648	0.000159859	0.000399648	0.000319719	0.0127088	0.0119095	0.00407641	0.00519543
OTU_40	40	Bacteroidetes	Flavobacteriia	Flavobacteriales	Flavobacteriaceae	Flavobacterium		0.00887219	0	0	0	0.00895212	0	0	0	0	7.99297e-05	0.00159859	0.00183838	0.00191831	0.000639437	0.00223803	0.00191831	0.000159859	0.00503557	0.000799297	0.0161458	0.0430821	0.000159859	0.010231	0.00935177	0.00495564	0.00991128	0.00543522	0.00375669	0.00223803	0.00359683	0.00623451	0.0127887	0.0119894	0.00207817	0.0165454	7.99297e-05	0.038606	0.00575494	0.00199824	0.00351691	0.0072736	0.00119894
OTU_185	185	Proteobacteria	Alphaproteobacteria	Rhodospirillales	AKYH478			0	0	0	0	0	0	0	0	0	0	0	0	0	7.99297e-05	0	0	0	0	0	0	0	0	0	0	0	0	0	0	0	0	0	0	0	0	0	0	0	0	0	0	7.99297e-05	0
OTU_101	101	Proteobacteria	Betaproteobacteria	SC-I-84				0	0	0	0	0	0	0.000399648	0	0	0	7.99297e-05	7.99297e-05	0.000319719	0	0	0	0	0.000159859	0	0.000159859	0	0	0	7.99297e-05	0	7.99297e-05	0.000159859	0.000159859	7.99297e-05	0	0	0	7.99297e-05	0	0	0	0.000239789	0.000319719	0.00487571	0.00319719	0.00495564	0.00495564
OTU_1089	1089	Proteobacteria	Gammaproteobacteria	Xanthomonadales	Xanthomonadaceae			0	0	0	0	0	0	0	0	0.000479578	0	0	0	0	0	0	0	0	0	0	0.000399648	0	0	0	7.99297e-05	0	0	0	7.99297e-05	0.000719367	0	0	0	7.99297e-05	0	0	0	0	0	0.000399648	0.000239789	0.000159859	0.000479578
OTU_1112	1112	Proteobacteria	Betaproteobacteria	Methylophilales	Methylophilaceae	Methylotenera		0	0	0	0	0	0	0	0	0.000799297	0	7.99297e-05	0.000479578	0.000239789	0	0.000399648	0.000319719	7.99297e-05	0.000159859	7.99297e-05	0.00231796	0.00207817	0.00575494	0.000479578	0.00119894	0.00567501	0.012549	0.00487571	0.021581	0.0145472	0.000559508	0.00159859	0.0137479	0.00623451	0.0278955	0.0119095	0.0013588	0.00311726	0.033011	0.00399648	0.00399648	0.00239789	0.0051155
OTU_93	93	Bacteroidetes	Sphingobacteriia	Sphingobacteriales	Saprospiraceae			0	0	0	0	0	0	0	0	0	0	0	0.000159859	0	7.99297e-05	0.000319719	0	0	7.99297e-05	7.99297e-05	0	0	0	0	0	0.000159859	0	0	0.000159859	7.99297e-05	0	0	0	7.99297e-05	0	0	0	7.99297e-05	0.000159859	0.000159859	7.99297e-05	0.000399648	0.000159859
OTU_108	108	Gemmatimonadetes	unidentified_Gemmatimonadetes	AT425-EubC11_terrestrial_group				0	0	0	0	0	0	0	0	0	0	0	0	7.99297e-05	0.000239789	0	0	7.99297e-05	0	0	0.000479578	0	0	0	7.99297e-05	0	0	0	0	0	0	0	0	0.000239789	0	0	0	0	0	0.00223803	0.000799297	0.000399648	0.000479578
OTU_1340	1340	Proteobacteria	Alphaproteobacteria	Caulobacterales	Caulobacteraceae	Brevundimonas		0.00871233	0.0120694	7.99297e-05	7.99297e-05	0.0013588	0.0029574	0.00223803	0.00567501	0.00567501	0.000479578	0.00255775	0.00151866	0.000559508	0.000479578	0.000959156	0.000319719	0.00503557	0.000239789	0.00175845	0.014787	0.00375669	0.0115099	0.00279754	0.00207817	0.010231	0.00127887	0.000559508	0.00231796	0.000719367	0.00231796	0.000399648	0.000319719	0.00247782	0.00343698	0.00127887	0.000799297	0.000399648	7.99297e-05	0.00207817	0.000639437	0.000959156	0.00103909
OTU_30	30	Proteobacteria	Betaproteobacteria	Burkholderiales	Comamonadaceae	Pelomonas		0.0301335	0.00111902	0.0242187	0.00143873	0.00335705	0.00407641	0.00279754	0.0190233	0.00463592	0.0333307	0.00391655	0.000959156	0.00311726	0.00439613	0.0064743	7.99297e-05	7.99297e-05	0.00183838	7.99297e-05	0.00143873	0.0029574	0.000239789	7.99297e-05	0.000399648	0.000639437	0.00255775	0.00191831	0.00183838	0.000719367	0.00671409	0.00255775	0.000399648	0.000959156	0.00175845	0.000479578	0.000159859	0.00287747	0.00239789	0.00351691	0.00391655	0.0094317	0.00439613
OTU_95	95	Proteobacteria	Alphaproteobacteria	Sphingomonadales	JG34-KF-161			0	0	0	0	0	0	0	0	0	0	0	0	0.000799297	7.99297e-05	0.000319719	0.000159859	0.000159859	0	7.99297e-05	7.99297e-05	0.000159859	0	0	0	7.99297e-05	0.000319719	7.99297e-05	0.000239789	7.99297e-05	0	0	0	0.000159859	0.000319719	0.000239789	0	0.000319719	0.000239789	0.00799297	0.00743346	0.00903205	0.00719367
OTU_100	100	Proteobacteria	Alphaproteobacteria	Sphingomonadales	Erythrobacteraceae			0	0	0	0	0	0	0	0	0	0	0	0.000159859	0.000399648	0.000959156	0.000959156	7.99297e-05	0	0.000239789	7.99297e-05	0	0	0	0	0	0	0.000159859	7.99297e-05	0.000159859	0	0	0	7.99297e-05	7.99297e-05	0	0	0	0.000159859	7.99297e-05	0.000959156	0.0021581	0.00127887	0.00239789
OTU_1172	1172	Proteobacteria	Betaproteobacteria	Burkholderiales	Comamonadaceae			0	0	0	0	0	0	0	0	0.00119894	0	0	0	7.99297e-05	0	0	0	0	0	0	0	0	0	0	0	0	0	7.99297e-05	7.99297e-05	0	0	0	0	0	0	0	0	0	7.99297e-05	0.000319719	0.000319719	0.000239789	0.000239789
OTU_5	5	Proteobacteria	Betaproteobacteria	Burkholderiales	Oxalobacteraceae	Duganella		7.99297e-05	7.99297e-05	0	0.00127887	0.000159859	0.0689793	0.0542722	0.00791304	0.0451603	0.077292	0.0419631	0.0178243	0.00471585	0.00743346	0.01135	0.0230997	0.000399648	0.00175845	0.000559508	0.0266965	0.0171049	0.0930381	0.0029574	0.0129486	0.129166	0.157861	0.196547	0.218288	0.0310127	0.00679402	0.00455599	0.00623451	0.014787	0.00471585	0.0931181	0.0276557	0.00143873	0.186236	0.00191831	0.0029574	0.00255775	0.00183838
OTU_234	234	Proteobacteria	Alphaproteobacteria	Sphingomonadales	Erythrobacteraceae	Altererythrobacter		0	0	0	0	0	0	0	0	0	0	0	7.99297e-05	7.99297e-05	7.99297e-05	0.000159859	7.99297e-05	0	0.000159859	0	0.000239789	0	7.99297e-05	0	7.99297e-05	0	0.000159859	0	0	7.99297e-05	0	0.000239789	7.99297e-05	0.000159859	0.000639437	0	0	7.99297e-05	0.000159859	0.00191831	0.00119894	0.000879226	0.00255775
OTU_990	990	Gemmatimonadetes	unidentified_Gemmatimonadetes	Gemmatimonadales	Gemmatimonadaceae			0	0	0	0	0	0	0	0	0	0	0	0	0	0	7.99297e-05	0	0	0	7.99297e-05	0	0	0	0	0	0	0	0	7.99297e-05	0	0	0	0	0	0	0	0	0	0	7.99297e-05	0	0	0.000319719
OTU_72	72	Proteobacteria	Betaproteobacteria	TRA3-20				0	0	0	0	0.000159859	0	0	0	0	0	0	7.99297e-05	0.000479578	7.99297e-05	7.99297e-05	0	7.99297e-05	0.000159859	0	7.99297e-05	0	0.000159859	0	0	0	0.000399648	0.000159859	7.99297e-05	7.99297e-05	0	0	0	7.99297e-05	0	0	0	0.000239789	0.000239789	0.0119095	0.012469	0.0110303	0.00879226
OTU_122	122	Verrucomicrobia	Opitutae					0	0	0	0	0	0	0	0	0	0	0	0	0	7.99297e-05	7.99297e-05	0	0	7.99297e-05	7.99297e-05	0	0	0	0	0	0	7.99297e-05	0	7.99297e-05	0	0	7.99297e-05	0	0	0	0	0	0	7.99297e-05	0.00319719	0.00159859	0.00111902	0.00335705
OTU_2772	2772	Proteobacteria	Betaproteobacteria	Nitrosomonadales	Nitrosomonadaceae			0	0	0	0	0	0	0	0	0.00103909	0	0	0	0.000239789	0	0.000239789	0	0	7.99297e-05	7.99297e-05	7.99297e-05	0	0	0	0.000239789	7.99297e-05	0.000319719	7.99297e-05	7.99297e-05	7.99297e-05	0	0.000239789	7.99297e-05	0.000159859	7.99297e-05	0	0	0.000239789	0.000239789	0.0158261	0.0105507	0.0094317	0.0133483
OTU_81	81	Proteobacteria	Betaproteobacteria	Burkholderiales	Comamonadaceae	Ramlibacter		0	0	0	0	0	0	0	0	0	0	0	0	0	7.99297e-05	0.000479578	0.000239789	7.99297e-05	7.99297e-05	0.000239789	0	0	0	0	0	7.99297e-05	0.00119894	7.99297e-05	0.000319719	7.99297e-05	7.99297e-05	7.99297e-05	0	0.000159859	0	0	0	7.99297e-05	0.000319719	0.00775318	0.0100711	0.00919191	0.00871233
OTU_50	50	Proteobacteria	Alphaproteobacteria	Sphingomonadales	Sphingomonadaceae	Sphingomonas		0	0	0	0	0	0	0	0	0	0	0.000239789	7.99297e-05	0.000319719	0	0.000239789	0.000159859	0	0.00111902	0.000319719	0.000639437	0.000319719	0.000399648	0	0.000239789	0.000479578	0.000399648	0	0.00119894	0.000799297	0	0.000159859	0	0.0029574	0.000399648	7.99297e-05	0	0.000239789	0.000159859	0.00735353	0.00423627	0.00191831	0.0106306
OTU_1169	1169	Proteobacteria	Betaproteobacteria	Burkholderiales	Comamonadaceae			0	0	0	0	0	0	0	0	0	0	0	0.000159859	0	0	0.000159859	0.000239789	0	7.99297e-05	0	0.000399648	0.000159859	0	0	0.000399648	0.000239789	0.000479578	7.99297e-05	0.000719367	0.00703381	0	0	0	0.000159859	0.000319719	0	7.99297e-05	7.99297e-05	7.99297e-05	0.00159859	0.00175845	0.00175845	0.00271761
OTU_1111	1111	Proteobacteria	Gammaproteobacteria	Xanthomonadales	Xanthomonadaceae	Lysobacter		0	0	0	0	0.00111902	0	0	7.99297e-05	0	0	0.000159859	7.99297e-05	0	0.000639437	0	0	0	0.000159859	0	0	0	0	0	7.99297e-05	7.99297e-05	0.000559508	0.000159859	0	0	0	0	0.000319719	7.99297e-05	0	0.000159859	0	0	7.99297e-05	0.000639437	0.000479578	0.000959156	0.000719367
OTU_3341	3341	Proteobacteria	Gammaproteobacteria	Xanthomonadales	Xanthomonadaceae	Arenimonas		0	0	0	0	0	0	0	0	0	0	0	7.99297e-05	0	0	7.99297e-05	0	0	7.99297e-05	0	0	0	7.99297e-05	0	0	0.000159859	0.000159859	0	0.000159859	7.99297e-05	0	7.99297e-05	0.000159859	0	0.000479578	0	0	0	0	0.000799297	0.000479578	0.000799297	0.0013588
OTU_543	543	Gemmatimonadetes	unidentified_Gemmatimonadetes	Gemmatimonadales	Gemmatimonadaceae	unidentified_Gemmatimonadetes	bacterium_enrichment_culture_clone_R1492-14	0	0	0	0	0	0	0	0	0	0	0	0	0	0	7.99297e-05	0	0	0	0	0	0	0	0	0	0	0	0	0	0	0	0	0	7.99297e-05	0	0	0	0	0	7.99297e-05	0	7.99297e-05	7.99297e-05
OTU_818	818	Proteobacteria	Betaproteobacteria	Rhodocyclales	Rhodocyclaceae	Ferribacterium		0	0	0	0	0	0	0	0	0	0	0	0	0	0	0	0	0	0	0	0	0	0	0	0	0	0	0	0	0	0	0	0	7.99297e-05	0	0	0	0	0	0	0	0	0
OTU_292	292	Proteobacteria	Alphaproteobacteria	Rhodobacterales	Rhodobacteraceae	Rubellimicrobium		0	0	0	0	0	0	0	0	7.99297e-05	0	0	0	0	7.99297e-05	0.000159859	0	0	0	7.99297e-05	0	0	0	0	0	0	0	0.000239789	7.99297e-05	0	0	0	0	0.000159859	0	0.000159859	0	0	7.99297e-05	0.000479578	0.000399648	0.000239789	0.000719367
OTU_44	44	Proteobacteria	Betaproteobacteria	SC-I-84				0	0	0	0	0	0	0	0	0	0	0	7.99297e-05	0.000399648	7.99297e-05	0.000239789	0.000159859	0	7.99297e-05	0	0	0	7.99297e-05	0	7.99297e-05	7.99297e-05	0.000239789	7.99297e-05	0.000159859	0.000319719	0	7.99297e-05	0	0	7.99297e-05	0	0	0.000319719	0.000399648	0.0106306	0.00783311	0.00791304	0.0116697
OTU_27	27	Proteobacteria	Betaproteobacteria	Methylophilales	Methylophilaceae	Methylophilus		0	0	0	0	0	0	0	0	0	0	7.99297e-05	0.000559508	0.000159859	0	0.000319719	7.99297e-05	0	0.000159859	0.000319719	0.00839261	0.000639437	0.00239789	0.000879226	0.00119894	0.00735353	0.00423627	0.000399648	0.00607465	0.00359683	0.00167852	0.0101511	0.0155863	0.0334905	0.0266166	0.0109504	0.0155863	0.00287747	0.0191032	0.000319719	7.99297e-05	0.00271761	0.000159859
OTU_58	58	Proteobacteria	Gammaproteobacteria	Xanthomonadales	Xanthomonadaceae	Pseudoxanthomonas		0	0.00111902	0	0	0	0	0.000239789	7.99297e-05	0.000479578	0.0013588	0	0.000559508	0.000479578	0	0.000399648	0	7.99297e-05	0.000239789	0	0.00103909	0.000799297	0.000959156	7.99297e-05	0.0021581	0.0029574	0.00167852	0.000799297	0.00607465	0.00439613	0.000479578	0.000959156	0.000959156	0.000239789	0.000639437	0.00239789	0.00575494	0.000559508	7.99297e-05	0.0013588	0.00287747	0.0021581	0.00303733
OTU_54	54	Actinobacteria	unidentified_Actinobacteria	Micrococcales	Microbacteriaceae	Galbitalea		0	0	0	0	0	0	0	0	0.000159859	0	0.000159859	0.000559508	0.000159859	0	0.00119894	7.99297e-05	7.99297e-05	0.000239789	0.000319719	0.00455599	0.00127887	0.000479578	0.000319719	0.000479578	0.00783311	0.000399648	0.000399648	0.00183838	0.00103909	0.00351691	0.00183838	0.00247782	0.00271761	0.00263768	0.000879226	0.000159859	0	0.000319719	0.0013588	0.000959156	0.00175845	0.000799297
OTU_333	333	Bacteroidetes	Flavobacteriia	Flavobacteriales	Flavobacteriaceae	Flavobacterium		0	0	0	0	0	0	0	0	0	0	0.000239789	0	0.000159859	0.000159859	7.99297e-05	7.99297e-05	0	7.99297e-05	7.99297e-05	0	0	0	0	0.000159859	7.99297e-05	7.99297e-05	7.99297e-05	0	7.99297e-05	0	7.99297e-05	0	0.000159859	0	0.000239789	0	0.000159859	7.99297e-05	0.000319719	0.000639437	0.000239789	0.000319719
OTU_4542	4542	Proteobacteria	Betaproteobacteria	Burkholderiales	Comamonadaceae			0	0	0	0	0	0	0	0	0	0	0	0	7.99297e-05	0	7.99297e-05	0	0	7.99297e-05	0	0	0	0	0	0	0	7.99297e-05	0.000319719	7.99297e-05	0	0	7.99297e-05	0	0	0	0	0	0.000159859	0.000159859	0.00415634	0.00663416	0.00631444	0.00351691
OTU_74	74	Proteobacteria	Gammaproteobacteria	Aeromonadales	Aeromonadaceae	Aeromonas	Aeromonas_hydrophila	0	0.00223803	0	0	0	0	0	0	0	0	0.00111902	0	0.000159859	0.00655423	0.000479578	0	7.99297e-05	0.00367676	0.000159859	0.00239789	0.00263768	7.99297e-05	0.000639437	0.00151866	0.000799297	0.00127887	0.00191831	0.000319719	7.99297e-05	0	7.99297e-05	0.000159859	0.000159859	0	0	0	0.000639437	0.000159859	0.00263768	0.0133483	0.00559508	7.99297e-05
OTU_240	240	Proteobacteria	Alphaproteobacteria	Rhizobiales	MNG7			0	0	0	0	0	0	0	0	0	0	0	0	0.000159859	0	7.99297e-05	0	0	7.99297e-05	0	0	0	0	0	0	0	0	0	7.99297e-05	0	0	0	0	7.99297e-05	0	0	0	0	7.99297e-05	0.000959156	0.000559508	0.000879226	0.00119894
OTU_2445	2445	Proteobacteria	Betaproteobacteria	Methylophilales	Methylophilaceae	Methylotenera	Methylotenera_sp._73s	0	0	0	0	0	0	0	0	7.99297e-05	0.00439613	0	0	0.000319719	0	7.99297e-05	0	0	7.99297e-05	0	0.00111902	7.99297e-05	0.00207817	7.99297e-05	0.000159859	0.0013588	0.000239789	0.00111902	0.000959156	0.000479578	0	7.99297e-05	0.00415634	0.00591479	0.0199025	0.000319719	7.99297e-05	0.00119894	7.99297e-05	0.00127887	0.000879226	0.000559508	0.000959156
OTU_160	160	Proteobacteria	Alphaproteobacteria	Sphingomonadales	Sphingomonadaceae			0	0	0	0	0	0	0	0	0	0	0	0	7.99297e-05	0	0.000159859	0	0	7.99297e-05	0	0	0.000399648	0	0	0	7.99297e-05	0	0	0	0	0	0	0	0	0.000239789	0	7.99297e-05	7.99297e-05	7.99297e-05	0.000159859	0.000239789	0.000399648	0.00111902
OTU_104	104	Bacteroidetes	Flavobacteriia	Flavobacteriales	Flavobacteriaceae	Flavobacterium		0	0	0	0	0	0.00111902	0	0	0.00111902	0.00103909	0.000159859	0.000559508	0.000719367	0	0.000239789	0.000799297	7.99297e-05	0.000959156	7.99297e-05	0.000159859	0	0.00183838	7.99297e-05	0.000159859	0.00655423	0.00719367	0.000319719	0.00359683	0.000319719	7.99297e-05	0.000799297	0.000719367	0.00407641	0.000159859	0.00535529	0.00167852	0.00271761	0.000479578	0.000479578	0.000479578	0.00119894	0.000319719
OTU_103	103	Verrucomicrobia	OPB35_soil_group					0	0	0	0	0	0	0	0	0	0	7.99297e-05	0	0	0	7.99297e-05	0	0	7.99297e-05	0	0	0	0	0	0	7.99297e-05	0	0	0.000239789	0	0	7.99297e-05	0	0	0	0	0	0	0.000159859	0.00311726	0.00303733	0.00191831	0.00159859
OTU_4574	4574	Bacteroidetes	Flavobacteriia	Flavobacteriales	Flavobacteriaceae	Flavobacterium		0	0	0	0	0	0	0	0	0.000159859	0	0	0	0	0	0.000479578	0	0	0.000239789	7.99297e-05	0	0.000239789	0	0	7.99297e-05	0.000319719	0.000319719	0	0.000399648	7.99297e-05	7.99297e-05	0.000159859	0.000559508	0.000319719	0.000879226	0.000799297	7.99297e-05	0.00119894	7.99297e-05	0.000239789	0.000959156	0.000399648	0.000319719
OTU_302	302	Proteobacteria	Alphaproteobacteria	Rhodobacterales	Rhodobacteraceae	Rhodobacter		0	0	0	0	0	0	0	0	0	0	0	0	0	0.000159859	0.000239789	0	0	0.000239789	0	0	0	0	0	0	7.99297e-05	0	7.99297e-05	7.99297e-05	0	0	7.99297e-05	0.000159859	0	0.000239789	0	0	0	7.99297e-05	0.000319719	0.000239789	0.000239789	0.000799297
OTU_230	230	Proteobacteria	Gammaproteobacteria	Xanthomonadales	Xanthomonadaceae	Arenimonas		0	0	0	0	0	0	0	0	0	0	0	0	0	0	7.99297e-05	0	0	0	0	0	0	0	0	0	7.99297e-05	0	0	0.000239789	7.99297e-05	0	0	0	0	0	0	0	0	7.99297e-05	7.99297e-05	0.000159859	0.00263768	0.000159859
OTU_307	307	Gemmatimonadetes	unidentified_Gemmatimonadetes	Gemmatimonadales	Gemmatimonadaceae			0	0	0	0	0	0	0	0	0	0	0	0	0	0	0	0	0	0	0	0	0	0	0	0	0	0	0	0	0	0	7.99297e-05	0	0	0	0	0	0	0.000239789	0.000319719	0.000639437	0.000399648	0.000399648
OTU_739	739	Gemmatimonadetes	unidentified_Gemmatimonadetes	Gemmatimonadales	Gemmatimonadaceae			0	0	0	0	0	0	0	0	7.99297e-05	0	0	0	0.000159859	0	0	0	0.000719367	0	7.99297e-05	0	0	0	0	0	0	7.99297e-05	0	0	0	0	0	0	0	0	0	0	7.99297e-05	7.99297e-05	0.00271761	0.00239789	0.00207817	0.00255775
OTU_341	341	Proteobacteria	Alphaproteobacteria	Sphingomonadales	Erythrobacteraceae	Altererythrobacter		0	0	0	0	0	0	0	0	0	0	0	7.99297e-05	7.99297e-05	0	7.99297e-05	0.00263768	0	0	0	0.000159859	0	0	0	0	0	7.99297e-05	0	0	0	0	7.99297e-05	0	0	0.000319719	0	0	7.99297e-05	7.99297e-05	0.000479578	0.000399648	0.000319719	0.00111902
OTU_547	547	Proteobacteria	Betaproteobacteria	Methylophilales	Methylophilaceae			0	0	0	0	0	0	0	0	0	0	7.99297e-05	0.000639437	0.000319719	0.000159859	0.000479578	0.000159859	7.99297e-05	0.000159859	0.000159859	0.0215011	0.0021581	0.000799297	0.000159859	0.000159859	0.0187835	0.00559508	0.0107106	0.0191831	0.00351691	0.00279754	0.0021581	0.00575494	0.0119894	0.00735353	0.00127887	0.000479578	0.000319719	0.00655423	0.000479578	0.000479578	0.00119894	0.000479578
OTU_66	66	Actinobacteria	unidentified_Actinobacteria	Propionibacteriales	Nocardioidaceae	Nocardioides	Nocardioides_oleivorans	0.00175845	0	0	0.00303733	0	0.000159859	0	0	0.00143873	0	0	0.000399648	0.000559508	0	0.00279754	0.00103909	0.00199824	0.000399648	0.000239789	7.99297e-05	0.000239789	7.99297e-05	0	0	7.99297e-05	0.000399648	0	0.000159859	0.000159859	7.99297e-05	0	0.000319719	0.000719367	0.000559508	0.000399648	0	0.000159859	0.000239789	0.00279754	0.00231796	0.00183838	0.00159859
OTU_520	520	Proteobacteria	Gammaproteobacteria	Xanthomonadales	Xanthomonadaceae			0	0	0	0	0	0	0	0.000719367	0	0	0	0	7.99297e-05	7.99297e-05	0.000239789	0	0	7.99297e-05	0	0.000399648	0	0	0	0	0.000159859	0.000159859	0	0.00103909	0	0	0.000399648	0.000559508	7.99297e-05	0.000399648	7.99297e-05	0	0.000239789	7.99297e-05	0.000639437	0.00143873	0.000959156	0.00159859
OTU_208	208	Proteobacteria	Deltaproteobacteria	Myxococcales	Polyangiaceae	Sorangium		0	0	0	0	0	0	0	0	0	0	0	0	0	0	7.99297e-05	0	0	7.99297e-05	0	7.99297e-05	0	0	0	7.99297e-05	0	0	0	0.000159859	0	0	0	0	0	0	0	0	0.000159859	0	0.00127887	0.00103909	0.000879226	0.00119894
OTU_792	792	Proteobacteria	Gammaproteobacteria	Xanthomonadales	Xanthomonadaceae			0	7.99297e-05	0	0	0	0	0	0	0	0	7.99297e-05	0	0	0.000319719	0.000639437	0	0	0.00151866	0	0	0.000319719	7.99297e-05	7.99297e-05	0	0	0	0	0	0	0	0	0.000159859	0	7.99297e-05	0	0	0	0.00311726	0.000319719	0.000319719	0.000319719	0.00119894
OTU_911	911	Proteobacteria	Deltaproteobacteria	Myxococcales				0	0	0	0	0	0	0	0	0	0	0	0	0	0	0	0	0	0	0	0	0	0	0	0	0	0	0	0	0	0	0	0	0	0	0	0	0	0	0	0	0	7.99297e-05
OTU_9	9	Proteobacteria	Gammaproteobacteria	Pseudomonadales	Pseudomonadaceae	Pseudomonas	Pseudomonas_viridiflava	0.0155863	0	0.0109504	0.040924	0.00919191	0.231876	0.0139078	0.0259771	0.0219807	0.0946367	0.0271761	0.0278955	0.218927	0.00983135	0.0203021	0.0109504	0.0729758	0.0895212	0.0148669	0.0633043	0.0612261	0.077292	0.00455599	0.0176645	0.0617856	0.0434018	0.119495	0.0690592	0.125649	0.0395652	0.0119095	0.195748	0.153705	0.0107106	0.106946	0.231237	0.0278955	0.0429222	0.00471585	0.0021581	0.00127887	0.00223803
OTU_116	116	Proteobacteria	Alphaproteobacteria	Rhodospirillales	Acetobacteraceae	Rubritepida		0	0	0	0	0	0	0	0	0	0	0	7.99297e-05	0	0.000159859	0.000159859	7.99297e-05	0	0	0	0	7.99297e-05	0	0	0	0	0	0	0.000159859	0	7.99297e-05	0	0	0	0	0	0	0	0	0.000719367	0.000799297	0.000239789	0.000319719
OTU_221	221	Proteobacteria	Betaproteobacteria	Nitrosomonadales	Nitrosomonadaceae	unidentified_Nitrosomonadaceae	beta_proteobacterium_DC2b-18	0	0	0	0	0	0	0	0	0	0	0	7.99297e-05	7.99297e-05	0	0.000159859	0	0	0	0	0.000239789	0.000319719	0	0	7.99297e-05	0	7.99297e-05	0	7.99297e-05	0	0	0	0	0	0	0	0	0	7.99297e-05	0.000719367	7.99297e-05	0.000239789	0.000319719
OTU_262	262	Proteobacteria	Deltaproteobacteria	Myxococcales				0	0	0	0	0	0	0	0	0	0	0	0	0	0	0	0	0	0	7.99297e-05	0	0	0	0	0	0.000159859	0	0	0	0	0	0	0	0	0	0	0	0.000159859	0	0.000639437	0.000479578	0	0.000319719
OTU_227	227	Proteobacteria	Gammaproteobacteria	PYR10d3				0	0	0	0	0	0	0	0	0	0	0	0	0	0	0	0	0	0	0	0	0	0	0	0	0	0	0	0.000239789	0	0	0	0	0	0	0	0	7.99297e-05	0	0	0	0	0
OTU_20	20	Proteobacteria	Alphaproteobacteria	Sphingomonadales	Sphingomonadaceae	Sphingomonas		0.0154264	0.0152666	0.0346095	0.00839261	0.00847254	0.00319719	0.00311726	0.00527536	0.0561906	0.00583487	0.00231796	0.00271761	0.00887219	0.00423627	0.00415634	0.0780114	0.00991128	0.00455599	0.00119894	0.00463592	0.00199824	0.000319719	0.00127887	0.000799297	0.00143873	0.00151866	0.00223803	0.000959156	0.000719367	0.00407641	0.000639437	0.000479578	0.00167852	0.00103909	0	0.000639437	7.99297e-05	0.000159859	0.00495564	0.00367676	0.00143873	0.00327712
OTU_64	64	Actinobacteria	unidentified_Actinobacteria	Frankiales	Geodermatophilaceae	Blastococcus		0	0	0	0	0	0	0	0.0151866	0	0	0.000159859	0.000399648	0.000799297	0.000399648	0.000639437	0.00151866	0.0326113	0.000399648	0.000159859	0.00103909	0.000479578	0	0	0.000159859	7.99297e-05	0.000559508	0.000239789	0.000319719	0	0.00127887	7.99297e-05	0.000239789	0.000159859	0.000399648	0	0	0.00271761	0.000559508	0.0191831	0.0198226	0.0130285	0.00687395
OTU_117	117	Proteobacteria	Deltaproteobacteria	Myxococcales	Phaselicystidaceae	Phaselicystis		0	0	0	0	0	0	0	0	0	0	0	0	0	7.99297e-05	7.99297e-05	0	0	0	0	0.000239789	0	0	0	0	0	0	0	0	0	0	0	0	0	0	0	0	0	0	0.00111902	0.000559508	0.000799297	0.00111902
OTU_1208	1208	Proteobacteria	Betaproteobacteria	Rhodocyclales	Rhodocyclaceae			0	0	0	0	0	0	0	0	0	0	0	0	0	0	0	0	0	0	0	0	0	0	0	0	0	0	0	0	0	0	0	0	0	0	0	0	0	0	7.99297e-05	0	0.000239789	0
OTU_746	746	Proteobacteria	Betaproteobacteria	Rhodocyclales	Rhodocyclaceae	Dechloromonas		0	0	0	0	0	0	0	0	0	0	0	0	0	0	0	0	0	0	0	0	0	0	0	0	0	0	0	0	0	0	0	0	0	0	0	0	0	0	0	0	0	0
OTU_10	10	Firmicutes	Bacilli	Bacillales	Family_XII	Exiguobacterium	Exiguobacterium_sibiricum	0.119015	0.0970346	0.000159859	0.0203821	0.100232	0.000319719	0.00223803	0.000719367	7.99297e-05	7.99297e-05	0.000959156	0.00167852	0.00247782	0.00103909	0.00223803	0.00583487	0.164895	0.00183838	0.806171	0.0029574	0.00655423	0.000639437	0.000639437	0.000159859	0.000239789	0.000639437	0.00239789	0.000319719	7.99297e-05	0.000239789	0	0.000239789	0.00223803	7.99297e-05	0.00151866	7.99297e-05	0	0	0	0	0	7.99297e-05
OTU_67	67	Actinobacteria	unidentified_Actinobacteria	Micrococcales	Microbacteriaceae	Microbacterium	Microbacterium_oxydans	0	0	0.00607465	0	0	0	7.99297e-05	0.00167852	0.000319719	0	0.000639437	0.000719367	0.000399648	0.00303733	0.000479578	0.00343698	0.00615458	0.000399648	0.00279754	7.99297e-05	0.000239789	0.000239789	0.000319719	0.000399648	0.00183838	0.00119894	0.000479578	0.00167852	0.000399648	0.000159859	0	0.000559508	0.000799297	0	0.000239789	0.000319719	0.000399648	0.000239789	0.00239789	0.00127887	0.0021581	0.00159859
OTU_939	939	Bacteroidetes	Flavobacteriia	Flavobacteriales	Flavobacteriaceae	Flavobacterium		0	0	0	0	0	0	0	0	0	0	7.99297e-05	7.99297e-05	0.000319719	0.000159859	0.000319719	0.000159859	0	0.000159859	0	0.000159859	0	0	0.00199824	0.0013588	0.00127887	0.00343698	0.00175845	0.00279754	0.00351691	7.99297e-05	0.000239789	0.000639437	0.000399648	7.99297e-05	0.000879226	0	0.00615458	0.000399648	0.00567501	0.0155064	0.0104708	0.000799297
OTU_57	57	Proteobacteria	Betaproteobacteria	Nitrosomonadales	Nitrosomonadaceae	unidentified_Nitrosomonadaceae	bacterium_TG154	0	0	0	0	0	0	0	0	0.00247782	0.000159859	0	0	0	0	0.000159859	0	0	7.99297e-05	0	0	0.000319719	0	0	7.99297e-05	7.99297e-05	0	0	0.000399648	0.000319719	0	0	7.99297e-05	0	0.000239789	0	0	0	7.99297e-05	0.0013588	0.00143873	0.000799297	0.00311726
OTU_352	352	Proteobacteria	Alphaproteobacteria	Sphingomonadales	Sphingomonadaceae	Novosphingobium		0	0	0	0	0	0	0	0	0.000799297	0	0	7.99297e-05	7.99297e-05	7.99297e-05	0.000159859	0	7.99297e-05	0.000319719	0	0	0	0	0	0	7.99297e-05	0.000159859	0.000159859	0	0.000159859	0	0.000159859	0	7.99297e-05	0.000319719	0	0	0	0	0.00199824	0.000559508	0.00127887	0.000959156
OTU_680	680	Proteobacteria	Gammaproteobacteria	Cellvibrionales	Cellvibrionaceae	Cellvibrio		0	0	0	0	0	0	0	0	0	0	0	0	0	0	0	7.99297e-05	0	0	0	0	0	0	7.99297e-05	0	0	0.000159859	0	7.99297e-05	0.000239789	0	0.00111902	0.00111902	0.000159859	0.00207817	0.000399648	7.99297e-05	0.000239789	0.000159859	0.000159859	0	0	7.99297e-05
OTU_229	229	Bacteroidetes	Sphingobacteriia	Sphingobacteriales	env.OPS_17			0	0	0	0	0	0	0	0	0	0	0	7.99297e-05	0.000159859	0	0	0	0	0	0.000159859	7.99297e-05	0.000239789	0	0	7.99297e-05	0.000319719	0	0	0.000319719	0	0	0	7.99297e-05	0.000719367	0.000159859	0	0	0	7.99297e-05	0.000399648	0.000559508	0.000559508	0.000879226
OTU_602	602	Gemmatimonadetes	unidentified_Gemmatimonadetes	Gemmatimonadales	Gemmatimonadaceae			0	0	0	0	0	0	0	0	0	0	0	0	0	0	0	0	0	0	0	0	0	0	0	0	0	0	0	0	0	7.99297e-05	0	0	0	0	0	0	0	0	0.00103909	0.00103909	0.000479578	0.000559508
OTU_4	4	Proteobacteria	Alphaproteobacteria	Caulobacterales	Caulobacteraceae	Brevundimonas	Brevundimonas_diminuta	0.141076	0.228839	0.165934	0.155463	0.19263	0.0448405	0.129886	0.251219	0.149229	0.168811	0.236752	0.293422	0.194389	0.208936	0.541044	0.0924786	0.153385	0.18208	0.026137	0.00159859	0.00319719	0.000239789	0.00127887	0.0021581	0.000719367	0.00207817	0.00151866	0.000959156	0.000559508	0.00567501	0.0013588	0.000399648	0.000719367	0.000559508	7.99297e-05	0	0.000959156	0.000559508	0.000399648	0.000799297	0.000959156	0.000639437
OTU_524	524	Proteobacteria	Alphaproteobacteria	Sphingomonadales	Sphingomonadaceae	Sphingomonas	Sphingomonas_aerolata	0	0	0	7.99297e-05	0	0.00543522	0.000239789	0	0.0632244	0.00167852	0.00903205	0.00527536	0.0141476	0.00103909	0.00359683	0.302614	0.00407641	0.0393254	0.00615458	0.000319719	0.000239789	0.00111902	0	0.000159859	0.0021581	0.000799297	0.000239789	7.99297e-05	0.000959156	0	7.99297e-05	0.000159859	7.99297e-05	0.000239789	0.000639437	0.00143873	0.000319719	0.000159859	0.00591479	0.00471585	0.00119894	0.00343698
OTU_4758	4758	Proteobacteria	Betaproteobacteria	Burkholderiales	Oxalobacteraceae	Massilia		0	0.00127887	0	0.00255775	0	0.00735353	0.00383662	0.00463592	0.00399648	0.0141476	0.000319719	0.00319719	0.0043162	0.000479578	0.000319719	0.000239789	7.99297e-05	0.000319719	0.000399648	0.00735353	0.0120694	0.00391655	0.00655423	0.00815283	0.0176645	0.00703381	0.00695388	0.0110303	0.00711374	0.00239789	0.00127887	0.00343698	0.000559508	0.000959156	0.00103909	0.00191831	0.00103909	0.000239789	0.000719367	0.00119894	0.000639437	0.000639437
OTU_1718	1718	Acidobacteria	Holophagae	Subgroup_10	ABS-19			0	0.00119894	0	0	0	0	0	0	0	0	0.00271761	7.99297e-05	0	0	0	0	7.99297e-05	0	0	0	0.000399648	0	0	0	7.99297e-05	0.000319719	0.000239789	0	0	0	7.99297e-05	0	7.99297e-05	0	7.99297e-05	0	0.000239789	0	0.000879226	0.000879226	0.000559508	0.00103909
OTU_209	209	Bacteroidetes	Flavobacteriia	Flavobacteriales	Flavobacteriaceae	Flavobacterium	Flavobacterium_sp._NW20	0	0	0	0	0	0	0	0	0	0	0	0.000239789	0	0	0.000159859	7.99297e-05	7.99297e-05	7.99297e-05	0	0	7.99297e-05	0	7.99297e-05	0.000159859	0.00159859	0.000399648	0.000399648	0.00143873	0.000239789	0.00375669	0.000879226	0.000239789	0.000879226	7.99297e-05	0.00223803	0.000319719	0.000879226	0.000239789	0.000319719	0.000559508	0.000479578	0.00103909
OTU_2935	2935	Acidobacteria	Holophagae	Subgroup_7				0	0	0	0	0	0	0	0	0	0	7.99297e-05	0	0	7.99297e-05	7.99297e-05	0	0	0	0	0	0	0	0	0	7.99297e-05	0	0	7.99297e-05	7.99297e-05	0	0	0	0	0	0	0	0.000159859	0	0.00143873	0.00111902	0.000399648	0.00127887
OTU_945	945	Bacteroidetes	Flavobacteriia	Flavobacteriales	Flavobacteriaceae			0	0	0	0	0	0	0	0	0	0	0	0	0	0	0	0	0	0	0	0.000399648	0	0	0	0	0	0.000239789	7.99297e-05	7.99297e-05	0	0	0	0	7.99297e-05	0	0.000639437	0	0.000719367	0	0.000319719	0.000399648	7.99297e-05	0.000319719
OTU_491	491	Proteobacteria						0	0	0	0	0	0	0	0	0	0	0	0	7.99297e-05	0	7.99297e-05	0	0	0	0	0	0	0	0	0	0	0	0	0	0	0	7.99297e-05	0	7.99297e-05	0	0	0	0	0	7.99297e-05	7.99297e-05	0.000319719	0
OTU_2299	2299	Proteobacteria	Gammaproteobacteria	Xanthomonadales	Xanthomonadaceae			0	0	0	0	0	0	0	0	0	0	0	0	7.99297e-05	0	0	7.99297e-05	0	0	0	0	0	0	0	0	0	0	0	0	0	0	0	0	0	0	0	0	0	0	0.000319719	0	0.000239789	0.000239789
OTU_1027	1027	Proteobacteria	Deltaproteobacteria	Desulfuromonadales	AKYG597			0	0	0	0	0	0	0	0	0	0	0	0	0	0	0	0	0	0	0	0	0	0	0	0	0	0	0	0	0	0	0	0	0	0	0	0	0	0	0	0	0	0
OTU_220	220	Chlorobi	Chlorobia	Chlorobiales	OPB56			0	0	0	0	0	0	0	0	0	0	0	0	0	0	0	0	0	0	0	0	0	0	0	7.99297e-05	0	0	0	0.000239789	0	0	0	0	0.000239789	0	0	0	0	0	0.000159859	0.000159859	0	0.000159859
OTU_62	62	Proteobacteria	Alphaproteobacteria	Sphingomonadales	Sphingomonadaceae			0	0	0	0	0.000239789	0	0	0	0	0	0	0	7.99297e-05	7.99297e-05	0	0	0	7.99297e-05	0	0	0	0.000159859	0	0.000159859	0	0.000719367	0.000319719	7.99297e-05	0	0	7.99297e-05	0	7.99297e-05	0.000239789	0	0	0.000239789	0.000239789	0.00351691	0.00247782	0.000879226	0.00783311
OTU_32	32	Proteobacteria	Gammaproteobacteria	Cellvibrionales	Cellvibrionaceae	Cellvibrio		0	0	0	0	0	0	0	0	0.000639437	0	0.000239789	0.000399648	0.000159859	7.99297e-05	0.000239789	7.99297e-05	0	7.99297e-05	7.99297e-05	0.0117497	7.99297e-05	0.000319719	0.000319719	0.00103909	0.0029574	0.00191831	0.0013588	0.00223803	0.0029574	0.000399648	0.000719367	0.00775318	0.019343	0.0227	0.0064743	7.99297e-05	7.99297e-05	0.00855247	0.000559508	0.000799297	0.000479578	0.00111902
OTU_199	199	Proteobacteria	Alphaproteobacteria	Caulobacterales	Caulobacteraceae	Phenylobacterium		0	0	0	0	0	0	0	0	0	0	0.000159859	7.99297e-05	0.000159859	0.000719367	7.99297e-05	7.99297e-05	0	0.000159859	0	0	0	0	0	0.000159859	7.99297e-05	0	0	0	0	7.99297e-05	0	0	0	0	7.99297e-05	0	0.000159859	7.99297e-05	0.00183838	0.000879226	0.00183838	0.00351691
OTU_686	686	Proteobacteria						0	0	0	0	0	0	0	0	0	0	0	0	0	0	0	0	0	0	0	0	0	0	0	0	0	0	0	0	0	0	0	0	0	0	0	0	0	0	0	0	0	0
OTU_112	112	Nitrospirae	Nitrospira	Nitrospirales	Nitrospiraceae			0	0	0	0	0	0	0	0	0	0	0	7.99297e-05	0.000239789	0	0.000159859	0	0	0.000159859	7.99297e-05	0	7.99297e-05	0	0	7.99297e-05	0	7.99297e-05	0.000159859	0.000159859	0	7.99297e-05	7.99297e-05	0	7.99297e-05	0	0	0	0.000239789	0.000319719	0.00311726	0.00503557	0.00751339	0.00383662
OTU_123	123	Proteobacteria	Gammaproteobacteria	Xanthomonadales	unidentified_Xanthomonadales	Acidibacter		0	0	0	0	0	0	0	0	0	0	0	7.99297e-05	7.99297e-05	7.99297e-05	0.000159859	0	0	0	0	7.99297e-05	0.000399648	0	0	7.99297e-05	0	0.000159859	0	0.000399648	7.99297e-05	0	0	0	0.000399648	0	0	0	0.000559508	7.99297e-05	0.00175845	0.00255775	0.0105507	0.00191831
OTU_4367	4367	Bacteroidetes	Flavobacteriia	Flavobacteriales	Flavobacteriaceae	Flavobacterium		0	0	0	0	0	0	0	0	0	0	0	0.000159859	0	0	7.99297e-05	0.000319719	0	7.99297e-05	0	0	0.000319719	0	7.99297e-05	7.99297e-05	0.000879226	0.000159859	7.99297e-05	0.000399648	0.00239789	0	7.99297e-05	0	0.000399648	7.99297e-05	0	0	0.000239789	0.00855247	0.00127887	0.0013588	0.000879226	0.0013588
OTU_4493	4493	Proteobacteria	Alphaproteobacteria	Sphingomonadales	Sphingomonadaceae	Sphingomonas		0	0	7.99297e-05	0	0	0.000159859	7.99297e-05	0	0.00639437	0	7.99297e-05	0.000399648	0.000159859	7.99297e-05	0.000159859	7.99297e-05	0	7.99297e-05	0	7.99297e-05	0.000799297	0	0.000799297	0.000719367	0.000639437	0.000239789	0.000159859	0.000159859	0	0	0.000319719	7.99297e-05	0.000319719	0.000479578	0	0	0	0.00151866	0.000959156	0.000719367	0.000239789	0.000879226
OTU_1821	1821	Proteobacteria	Betaproteobacteria	Burkholderiales	Burkholderiaceae	Limnobacter		0	0	0	0	0	0	0	0	0	0	0	0.000319719	0	0	0	0	0	0	0	0	0	0	0	0.000159859	0.000159859	0	0	0	0	0	0.00223803	0	0.00679402	0	0	0	0	0.0201423	7.99297e-05	7.99297e-05	0	7.99297e-05
OTU_1187	1187	Gemmatimonadetes	unidentified_Gemmatimonadetes	Gemmatimonadales	Gemmatimonadaceae	Gemmatimonas		0	0	0	0	0	0	0	0	0	0	0	0	0	0	0	0	0	0	0	0	0	0	0	0	0	7.99297e-05	0	0	0	0	0	0	0	7.99297e-05	0	0	0	0	0.000719367	0.000719367	0.000559508	0.000559508
OTU_762	762	Proteobacteria	Alphaproteobacteria	Rhodobacterales	Rhodobacteraceae	Rubellimicrobium		0	0	0	0	0	0	0	0	0	0	0.000319719	0	7.99297e-05	0	7.99297e-05	7.99297e-05	0	0	0	0	0	0	0	0	0	0	0	0	7.99297e-05	0	0	0	0	0	0	0	0	0	7.99297e-05	0	0	0
OTU_13	13	Proteobacteria	Alphaproteobacteria	Sphingomonadales	Sphingomonadaceae	Sphingomonas	Sphingomonas_faeni	0	0	0.000159859	0.00335705	7.99297e-05	0.0094317	0.0378067	0.013588	0.182479	0.0140676	0.0322916	0.0135081	0.017025	0.00343698	0.00631444	0.055711	7.99297e-05	0.00895212	0.00183838	0.00887219	0.00383662	0.00799297	0	0.00423627	0.0237391	0.0211814	0.0140676	0.00591479	0.0151866	0.000159859	0.000399648	0.00103909	0.00167852	0.00231796	0.000399648	0.000879226	0.00127887	0.000799297	0.0179042	0.00911198	0.00279754	0.00791304
OTU_56	56	Actinobacteria	unidentified_Actinobacteria	Micrococcales	Micrococcaceae	Arthrobacter	Arthrobacter_oxydans	0.000719367	0	0	0.00191831	0	0	0	0	0.00207817	0	7.99297e-05	0.000239789	0.000559508	7.99297e-05	0.000559508	0.00127887	0.039725	0.000239789	0.000479578	7.99297e-05	0.000719367	7.99297e-05	7.99297e-05	0.000319719	7.99297e-05	0.000159859	7.99297e-05	0.000399648	0.000319719	0.000159859	0.000479578	0.000719367	7.99297e-05	0	0.000319719	0	0.000159859	0.000399648	0.00447606	0.0043162	0.00919191	0.00223803
OTU_179	179	Proteobacteria	Alphaproteobacteria	Rhizobiales	unidentified_Rhizobiales	Rhizomicrobium		0	0	0	0	0	0	0.000639437	0	0	0	0	0	7.99297e-05	0	0	0	0	0	0	0	0.000719367	7.99297e-05	0	0.000319719	0	0	0	7.99297e-05	7.99297e-05	7.99297e-05	0.000319719	0	0	0	0	0	0	0.000159859	0.00143873	0.00151866	0.00151866	0.00207817
OTU_1196	1196	Proteobacteria	Betaproteobacteria	Burkholderiales	Comamonadaceae	Ramlibacter		0	0	0	0	0	0	0	0	0	0	0	0	0	0	0	0	0	0	0	0	0	0	0	0.000159859	0	0	0	0	0	0	0	0	0	0	0	0	7.99297e-05	7.99297e-05	0.000399648	0.000959156	0.00143873	0.000639437
OTU_355	355	Verrucomicrobia	OPB35_soil_group					0	0	0	0	0	0	0	0	0	0	0	0	7.99297e-05	0	0	0	0	0	0.000159859	0.000159859	0	0	0	0	0	0	0	0	0	0	0	0	0	0	0	0	0	7.99297e-05	0.00119894	0.00103909	0.000639437	0.000639437
OTU_260	260	Acidobacteria	unidentified_Acidobacteria	Subgroup_6				0	0	0	0	0	0	0	0	0	0	0	0	0	0	0	0	0	0	0	0	0	0	0	0	0	0	0	0	0	0	0	0	0	0	0	0	0	0	0	7.99297e-05	7.99297e-05	0
OTU_533	533	Bacteroidetes	Flavobacteriia	Flavobacteriales	Flavobacteriaceae	Flavobacterium		0	0	0	0	0	0	0	0	0	0	0	0	0	0	0	7.99297e-05	0	0	0	0	0	0	0	0	0	7.99297e-05	0	0	7.99297e-05	0	0	0	0.00127887	0	0	0	0	0	0.000399648	0.000479578	0	0.000399648
OTU_378	378	Proteobacteria	Gammaproteobacteria	Oceanospirillales	Oceanospirillaceae	Pseudospirillum		0	0	0	0	0	0	0	0	0	0	0	0	0	0	0	0	0	0	0	0	0	0	0	0	7.99297e-05	0	0	0	0	0	0	7.99297e-05	0	0.000239789	7.99297e-05	0	0	0	0.000239789	0.000159859	0	0.000319719
OTU_191	191	Proteobacteria	Gammaproteobacteria	Xanthomonadales	Xanthomonadaceae			0	0	0	0	0	0	0	0	0	0	0	0.000159859	0	0	0	0	0	0	0	0	0	0	0	0	7.99297e-05	0	0	0	0	0	0	0.000159859	0	0	0	0	0	0.00487571	0	0	0	0
OTU_2398	2398	Proteobacteria	Betaproteobacteria	Burkholderiales	Oxalobacteraceae	Pseudoduganella		0	0	0	0	0	0	0	0	7.99297e-05	0	7.99297e-05	0	7.99297e-05	7.99297e-05	0	0	0.000159859	0	0	0.000319719	0.00407641	0.000239789	0	7.99297e-05	7.99297e-05	7.99297e-05	0.00111902	7.99297e-05	0	0	0	0	0	0	0	0.000879226	0.00319719	0	0.00119894	0.00167852	0.000479578	0.000399648
OTU_929	929	Verrucomicrobia	OPB35_soil_group					0	0	0	0	0	0	0	0	0	0	0	0.000159859	7.99297e-05	7.99297e-05	0	0	0	0	0	0	0	0	0	0	0	0	7.99297e-05	0	0	0	0	0	7.99297e-05	0	0	0	7.99297e-05	0.000239789	0.00199824	0.00103909	0.00159859	0.0013588
OTU_516	516	Gemmatimonadetes	unidentified_Gemmatimonadetes	Gemmatimonadales	Gemmatimonadaceae	Gemmatimonas		0	0	0	0	0	0	0	0	0	0	0	0	0	0	0	0	0	0	0	0	0	0	0	0	0	0	0	0	0	0	0	0	7.99297e-05	0	0	0	0	0	0.000319719	7.99297e-05	7.99297e-05	0.000159859
OTU_1414	1414	Proteobacteria	Deltaproteobacteria	Desulfuromonadales	JN18-A94-J			0	0	0	0	0	0	0	0	0	0	0	0	0	0	0	0	0	0	0	0	0	0	0	0	0	0	0	0	0	0	0	0	0	0	0	0	0	0	0	0	0	0
OTU_193	193	Acidobacteria	Holophagae	Subgroup_10	ABS-19			0	0	0	0	0	0	0	0	0	0	0	0	7.99297e-05	0	0	0	0	0	0	0	0	7.99297e-05	0	7.99297e-05	0.000159859	0	0	7.99297e-05	7.99297e-05	7.99297e-05	0	0	0	0	0	0	7.99297e-05	0	0.00231796	0.00167852	0.000959156	0.00183838
OTU_192	192	Gemmatimonadetes	unidentified_Gemmatimonadetes	Gemmatimonadales	Gemmatimonadaceae			0	0	0	0	0	0	0	0	0	0	0	0	0	0	7.99297e-05	0	0	0	0	0.000479578	0	0	0	0	7.99297e-05	0.000159859	0	0	0	0	0	0	0	0	0	0	7.99297e-05	0	0.00143873	0.00175845	0.000879226	0.000799297
OTU_716	716	Bacteroidetes	Cytophagia	Cytophagales	Cytophagaceae	Adhaeribacter		0	0	0	0	0	0	0	0	0	0	0	7.99297e-05	0	0	0	7.99297e-05	7.99297e-05	0	0	0	0	0	0	0	0.000479578	0	0	0	0.000159859	7.99297e-05	0	0	0	0	0	0	0	0	0	0.000479578	0.000239789	0.000239789
OTU_334	334	Proteobacteria	Deltaproteobacteria	Myxococcales	BIrii41			0	0	0	0	0	0	0	0	0	0	0	0	0.000159859	7.99297e-05	0	0	0	7.99297e-05	0	7.99297e-05	0	7.99297e-05	0	0	0	0	0	0	0	0	0	0	7.99297e-05	0	0	0	0.000399648	0	0.000799297	0.000799297	0.000159859	0.000319719
OTU_2764	2764	Proteobacteria	Alphaproteobacteria	Caulobacterales	Caulobacteraceae	Phenylobacterium		0	0	0	0	0	0	0	0	0	0	0	0	7.99297e-05	0	7.99297e-05	0.000719367	0	0	0	0.000239789	0.000239789	0	0	0	0.000239789	0	0	7.99297e-05	0	0	0	0	0	0	0	0	0	0	0.000559508	0.000319719	0.000959156	0.000479578
OTU_3851	3851	Proteobacteria	Deltaproteobacteria	Myxococcales	Polyangiaceae	Sorangium		0	0	0	0	0	0	0	0	0.00103909	0	0	0	0.000159859	0	7.99297e-05	0	0	0	0	0.000559508	0	0	0	0	0	0	7.99297e-05	0	7.99297e-05	0	7.99297e-05	0	0	0	0	0	0	0.000159859	0.00103909	0.000319719	0.000319719	0.000799297
OTU_398	398	Proteobacteria	Gammaproteobacteria	Xanthomonadales	Xanthomonadaceae			0	0	0	0	0	0	0	0	0	0	0	0	0	0	0	0	0	7.99297e-05	0	0	0	0.000159859	0	0	7.99297e-05	0	0	0	7.99297e-05	0	0	7.99297e-05	0	0	0	7.99297e-05	0	0	7.99297e-05	7.99297e-05	7.99297e-05	0.000399648
OTU_248	248	Verrucomicrobia	OPB35_soil_group					0	0	0	0	0	0	0	0	0	0	0	0	0	0	0	0	0	0	0	0	0	0	0	0	0	0	0	0	0	0	0	0	0	0	7.99297e-05	0	0	0.000239789	0.000399648	0.000559508	0.000719367	0.00103909
OTU_36	36	Proteobacteria	Alphaproteobacteria	Rhizobiales	Bradyrhizobiaceae	Bradyrhizobium	Bradyrhizobium_elkanii	0.00839261	0.000159859	0	0	0.00423627	0	0.00583487	0.00399648	0.000399648	0	0.00327712	0.00423627	0.0112701	0.00871233	0.00839261	0.00383662	0.00599472	0.00111902	0.000159859	0.00151866	0.00175845	0.000319719	7.99297e-05	0	0.000959156	0.000159859	0.000719367	0.000639437	0.000719367	0.000399648	0.000399648	0.000479578	0.00111902	0.000639437	7.99297e-05	0	0.00127887	0.000399648	0.00671409	0.0080729	0.00551515	0.0064743
OTU_86	86	Proteobacteria	Alphaproteobacteria	Sphingomonadales	Sphingomonadaceae	Sphingomonas	Sphingomonas_panni	0	0	0	0	0	0	0	0	0.0104708	0	7.99297e-05	0.000159859	0.000799297	0	0.000239789	0.0094317	0.00407641	0.00175845	0.000239789	0.000159859	0.000239789	0	0.000159859	7.99297e-05	0	7.99297e-05	7.99297e-05	0	0.000159859	0.000159859	0	0	0.000799297	0	0	0.000479578	0	7.99297e-05	0.00167852	0.00247782	0.000639437	0.00111902
OTU_110	110	Proteobacteria	Betaproteobacteria	Nitrosomonadales	Nitrosomonadaceae			0	0	0	0	0	0	0	0	0	0	0	0	0.000159859	0	0.000159859	0	0	7.99297e-05	0.000239789	0	0	0	0	0	0	7.99297e-05	7.99297e-05	0	0	0	0	7.99297e-05	0.000159859	0	0.000159859	0	0	0.000159859	0.00503557	0.00343698	0.00551515	0.00359683
OTU_78	78	Actinobacteria	unidentified_Actinobacteria	Frankiales				7.99297e-05	0	0.0127887	0	0	0	0	0	0	0	0	0	0.000319719	7.99297e-05	0	0	0	0	0	0	0	0	0	0	0	7.99297e-05	0.00191831	0	7.99297e-05	0	0	0	7.99297e-05	0	0	0	7.99297e-05	7.99297e-05	0.00127887	0.000559508	0.000399648	0.000719367
OTU_469	469	Proteobacteria	Alphaproteobacteria	Sphingomonadales				0	0	0	0	0	0	0	0	0	0	0	0	0	0	7.99297e-05	7.99297e-05	7.99297e-05	7.99297e-05	0	0	0	0	0	0	0	7.99297e-05	0	0	0	7.99297e-05	0	0	7.99297e-05	0	0	0	0.000239789	0	0.00151866	0.00175845	0.00167852	0.00223803
OTU_151	151	Gemmatimonadetes	unidentified_Gemmatimonadetes	Gemmatimonadales	Gemmatimonadaceae	Gemmatimonas		0	0	0	0	0	0	0	0	0	0	0	0	0	0	7.99297e-05	0	0	0	0	0	0	0	0	0	0	0	7.99297e-05	0	0	0	0	0	0	0	0	0	7.99297e-05	0	0.00151866	0.00167852	0.00103909	0.0021581
OTU_275	275	Planctomycetes	vadinHA49					0	0	0	0	0	0	0	0	0	0	0.000239789	0.000159859	0.000399648	0	0.000239789	7.99297e-05	0	7.99297e-05	0.000239789	7.99297e-05	0	0	0	0.000239789	0.000159859	0.000159859	0	0.000159859	7.99297e-05	7.99297e-05	7.99297e-05	0	0.000159859	0	0	0	0.000239789	0.000239789	0.000799297	0.000879226	0.000879226	0.000799297
OTU_219	219	Acidobacteria	unidentified_Acidobacteria	Subgroup_3	SJA-149			0	0	0	0	0	0	0	0	0	0	0	0	7.99297e-05	0	7.99297e-05	0	0	0	7.99297e-05	0	0	0	0	0.000159859	0	0	0	0	0	0	0	0	0	0	0	0	0	7.99297e-05	0.00103909	0.00103909	0.00151866	0.000239789
OTU_2480	2480	Proteobacteria	Betaproteobacteria	TRA3-20				0	0	0	0	0.00703381	0	0	0	0	7.99297e-05	0	0.00223803	0.000799297	0	0	0	0	0	0	0	0	0	0	0	0	0	0	0	0	0	0	0	0	0	0	0	0	0	7.99297e-05	0.000159859	0.000159859	0.000159859
OTU_327	327	Acidobacteria	unidentified_Acidobacteria	Subgroup_6				0	0	0	0	0	0	0	0	0	0	0	0	0	0	0	0	0	0	7.99297e-05	0	0	0	0	0	0	0.000159859	0.00143873	0.000239789	0	7.99297e-05	0	0	0	0	0	0	7.99297e-05	7.99297e-05	0.000159859	7.99297e-05	7.99297e-05	0
OTU_417	417	Bacteroidetes	Flavobacteriia	Flavobacteriales	Flavobacteriaceae	Flavobacterium		0	0	0	0	0	0	0	0	0	0	0	0	0.000239789	0.000159859	0.000159859	0.00159859	0	7.99297e-05	7.99297e-05	0	0	0	0.000239789	0	0	7.99297e-05	0	0.000319719	0	0	7.99297e-05	0.00479578	0	0	0	0	0	7.99297e-05	0	0	0	7.99297e-05
OTU_906	906	Acidobacteria	unidentified_Acidobacteria	Subgroup_4	unidentified_Acidobacteria	Blastocatella		0	0	0	0	0	0	0	0	0	0	0	0	0	0	7.99297e-05	0	0	0	0	0	0	0	0	0	0	0	0	7.99297e-05	0	0	0	0	0	0	0	0	0	0	0	7.99297e-05	7.99297e-05	7.99297e-05
OTU_415	415	Fibrobacteres	Fibrobacteria	Fibrobacterales	Fibrobacteraceae	possible_genus_04		0	0	0	0	0	0	0	0	0	0	0	7.99297e-05	0	0	0	0	0	0	0	0	0	0	0	0	0	0	0	0	0	0	0	0	0	0	7.99297e-05	0	0	0	0.000239789	0.000159859	7.99297e-05	0.000239789
OTU_544	544	Proteobacteria	Betaproteobacteria					0	0	0	0	0	0	0	0	0	0	0	0	0	0	0	0.000319719	0	0	0	0	0	0	0	0	0	0	0	0	0	0	0	0	0	0	0	0	0	0	0	0	0	7.99297e-05
OTU_446	446	Proteobacteria	Betaproteobacteria	B1-7BS				0	0	0	0	0	0	0	0	0	0	0	0	0	0	0	0	0	0	0	0	0	0	0	0	0	0	0	0	0	0	0	0	0	0	0	0	0	0	0.000159859	7.99297e-05	7.99297e-05	0.000319719
OTU_107	107	Proteobacteria	Betaproteobacteria	Burkholderiales	Oxalobacteraceae	Massilia		0	7.99297e-05	0	0	0	0.00543522	7.99297e-05	7.99297e-05	0.00303733	0	0.0051155	0.00311726	0.00271761	0.000719367	0.00119894	0.000959156	0.000239789	0.00103909	0.000559508	0.00815283	0.0126289	0.146351	0.0234993	0.029574	0.028455	0.0154264	0.0183838	0.0203821	0.0129486	0.0013588	0.00247782	0.0168652	0.00495564	0.00143873	0.00999121	0.0110303	0.00159859	0.0021581	0.000479578	0.000239789	0.000239789	0.00103909
OTU_305	305	Proteobacteria	Deltaproteobacteria	Myxococcales	Cystobacteraceae			0	0	0	0	0	0	0	0	0	0	0	0	0	0	0	0	0	0	0	0	0	0	0	0	0	0	0	0	0	0	7.99297e-05	7.99297e-05	0	0	0	0	0	7.99297e-05	0.00103909	0.00119894	0.000879226	0.00127887
OTU_150	150	Proteobacteria	Alphaproteobacteria	Rhizobiales	Rhizobiaceae	Shinella		0	0	0	0	0	0	0	0	0	0	0	0	0	0	0	0	0	0	0	0.000959156	0.000159859	7.99297e-05	0	7.99297e-05	0.000399648	0	0.000399648	0.000479578	0.000159859	0	0	0.000479578	7.99297e-05	0.000159859	7.99297e-05	0.000559508	7.99297e-05	0	0.000239789	0.000239789	0.000399648	0.000159859
OTU_246	246	Bacteroidetes	Flavobacteriia	Flavobacteriales	Flavobacteriaceae	Flavobacterium		0	0	0	0	0	0	0	0	0	0	0	0	0	7.99297e-05	7.99297e-05	7.99297e-05	7.99297e-05	0	0	0	0	0	0	0	0	7.99297e-05	0.000159859	0.000479578	0	7.99297e-05	0.000239789	0	0	0	0	0.000159859	0.000399648	7.99297e-05	0.000159859	0.000159859	0.000159859	0.000319719
OTU_251	251	Bacteroidetes	Sphingobacteriia	Sphingobacteriales	Saprospiraceae			0	0	0	0	0	0	0	0	0.000959156	0	0	0	7.99297e-05	0	0	0.00167852	0	7.99297e-05	7.99297e-05	0	0	0	0	0	0	7.99297e-05	0	0	0	0	0	0	7.99297e-05	0	0	0	7.99297e-05	7.99297e-05	0.000239789	0.000159859	0.000319719	0.000479578
OTU_692	692	Proteobacteria	Alphaproteobacteria	Rhizobiales	MNG7			0	0	0	0	0	0	0	0	0	0	0	0	0	0	7.99297e-05	0	0	0	0	0	0	0	0	0	0	0	0	0	0	0	0	0	0	0	0	0	0	0	0.000879226	0.000319719	0.000159859	0.000479578
OTU_2054	2054	Proteobacteria	Betaproteobacteria	Nitrosomonadales	Gallionellaceae	Candidatus_Nitrotoga		0	0	0	0	0	0	0	0	0	0	0	0	0	0	0	0	0	0	0	0	0	0	0	0	0	0	0	0	0	0	0	0	0	0	0	0	0	0	0	0	0.000159859	0.000159859
OTU_604	604	Gemmatimonadetes	unidentified_Gemmatimonadetes	AT425-EubC11_terrestrial_group				0	0	0	0	0	0	0	0	0	0	0	0	0	0	0	0	0	0	0	0	0	0	0	0	0	0	0	0	0	0	0	0	0	0	0	0	0	0	7.99297e-05	0	0	0
OTU_1204	1204	Acidobacteria	unidentified_Acidobacteria	Subgroup_3	unidentified_Acidobacteria	Bryobacter		0	0	0	0	0	0	0	0	0	0	0	0	0	0	0	0	0	0	0	0	0	0	0	0	0	0	0	0	0	0	0	0	0	0	0	0	0	0	0	0	7.99297e-05	0
OTU_683	683	Proteobacteria	Deltaproteobacteria	Myxococcales	Nannocystaceae			0	0	0	0	0	0	0	0	0	0	0	0	0	0	0	0	0	0	0	0	0	0	0	0	0	0	0	0	0	0	0	0	0	0	0	0	0	0	0	0	0	7.99297e-05
OTU_231	231	Gemmatimonadetes	unidentified_Gemmatimonadetes	Gemmatimonadales	Gemmatimonadaceae			0	0	0	0	0	0	0	0	0	0	0	0	0.000319719	7.99297e-05	0	0	0	0.000159859	7.99297e-05	0	0	0	0	0	0	7.99297e-05	0	0	0	0	0	0	0	0	0.000159859	0	0	7.99297e-05	0.00439613	0.00239789	0.00327712	0.00335705
OTU_278	278	Bacteroidetes	Flavobacteriia	Flavobacteriales	Flavobacteriaceae	Epilithonimonas		0	0	0	0.00183838	0	0.00263768	7.99297e-05	0	0.00639437	0	0.000319719	0.000159859	0.000159859	7.99297e-05	0.000319719	0.00191831	0	0.000239789	0.000879226	7.99297e-05	0.000239789	0	0.000159859	0	0.000399648	7.99297e-05	0	0.000319719	0	0	0.000159859	0.000239789	7.99297e-05	0	0.000239789	0	0	0.000159859	0.000319719	0.000319719	0.000559508	0.000399648
OTU_1904	1904	Proteobacteria	Betaproteobacteria	Burkholderiales	Oxalobacteraceae	Noviherbaspirillum		0	0	0	0	0	0	0	0	0	0	0	0	0	7.99297e-05	0	0	0	0	0	0	0	0	0	0	0	0	7.99297e-05	0	0	0	0	0	7.99297e-05	0	0	0	0	0	0.000239789	0.000239789	7.99297e-05	0.000239789
OTU_159	159	Proteobacteria	Deltaproteobacteria	Myxococcales	Sandaracinaceae			0	0	0	0	0	0	0	0	0	0	0	0	0.000159859	0	7.99297e-05	0	0	0	0	0.000399648	0.000399648	7.99297e-05	0	0	0	0	0	0	0.000239789	0	0	0.000319719	0.000319719	0.000559508	0	0	0.000399648	0.00223803	0.000479578	0.000399648	0.000319719	0.000239789
OTU_502	502	Proteobacteria	Deltaproteobacteria	Myxococcales	BIrii41			0	0	0	0	0	0	0	0	0	0	0	0	0	0	0.000159859	0	0	0	0	0	0	0	0	0.000319719	0	0	0	7.99297e-05	0	0	0.000319719	0	0	0	0	0	0	0	0.000239789	0.000319719	0.000639437	0.000239789
OTU_3990	3990	Proteobacteria	Betaproteobacteria	Burkholderiales	Comamonadaceae			0	0	0	0	0	0	0	0	0	0	0	0	0	0	0	0	0	0	0	0	0	0	0	0	0	0	0	0	0	0	0	0	0	0	0	0	0	0	0	0	0	0
OTU_2120	2120	Proteobacteria	Alphaproteobacteria	Sphingomonadales	Sphingomonadaceae	Novosphingobium		0	0	0	0	0.0145472	0.000239789	0.000319719	0.000159859	0.000399648	0.010231	0	0.00239789	0.00663416	0.00167852	0.00479578	7.99297e-05	0.00711374	0.00103909	0.000239789	0.000559508	0.000799297	7.99297e-05	0.00199824	0.000719367	0.000399648	7.99297e-05	0	7.99297e-05	0	0.000159859	0	0.000159859	0	0	7.99297e-05	0	7.99297e-05	7.99297e-05	0.000799297	0.000319719	0.000239789	0.000399648
OTU_377	377	Proteobacteria	Alphaproteobacteria	Rhizobiales	Rhizobiaceae	Rhizobium		0.000959156	0.00567501	0	0	0	0	7.99297e-05	0.00159859	0.00271761	0	0	0.000719367	0.0029574	0	7.99297e-05	0.00175845	7.99297e-05	0.00199824	0.000559508	0.00271761	0.000799297	0.000319719	7.99297e-05	0.000399648	0.00335705	0.00231796	0.000399648	0.00327712	0.000559508	0.00151866	0.000159859	0.000479578	0.000159859	0.00119894	0.000799297	0.00127887	0.000399648	0.00175845	0.000959156	0.000639437	7.99297e-05	0.000799297
OTU_166	166	Gemmatimonadetes	unidentified_Gemmatimonadetes	Gemmatimonadales	Gemmatimonadaceae			0	0	0	0	0	0	0	0	0	0	0	0	0.000159859	7.99297e-05	0	0	0	0	0	0.000159859	0	0	0	7.99297e-05	0	7.99297e-05	0	0	0	0	0	0	0	0	0	0	0.000159859	0	0.00127887	0.00103909	0.000879226	0.0013588
OTU_203	203	Verrucomicrobia	OPB35_soil_group					0	0	0	0	0	0	0	0	0	0	0	0	0.000239789	0	7.99297e-05	0	0	0	0	0	7.99297e-05	0	0	0	0	0	0	7.99297e-05	0	0	0	0	0	7.99297e-05	0	0	0	0.000159859	0.00319719	0.00167852	0.000959156	0.00119894
OTU_162	162	Proteobacteria	Alphaproteobacteria	Caulobacterales	Caulobacteraceae	Caulobacter	Caulobacter_henricii	0	0	0	0	0	0	0	0	0	0	0	7.99297e-05	7.99297e-05	0	0	0.000159859	0	0	0	0.000719367	0.000959156	0	0	0.000319719	0.00255775	7.99297e-05	0	0.000559508	0.00695388	0	7.99297e-05	7.99297e-05	0.000879226	0	0	0.000559508	0	0	0.000319719	0.000479578	0.000639437	0.000799297
OTU_268	268	Proteobacteria	Alphaproteobacteria	Sphingomonadales	Sphingomonadaceae	Sphingopyxis		0	0	0	0	0	0	0	0	0	0	0	0.00143873	7.99297e-05	0	0	0	0	0	0	0	7.99297e-05	0	0	0.000159859	0	7.99297e-05	0	0.000639437	7.99297e-05	0	0	0.000239789	0	0.000799297	0.000319719	0	0	0	0.000239789	0	0	0
OTU_1244	1244	Proteobacteria	Alphaproteobacteria	Caulobacterales	Caulobacteraceae	Caulobacter		0	0	0	0	0	0	0	0	0	0	0	0	0	0	0	0	0	0.00415634	0.000319719	0	0	0	0	0	0	0	0	0.000239789	0	0	0	0	0	0	0	0	7.99297e-05	0	7.99297e-05	0.000319719	0.000239789	0.000239789
OTU_1338	1338	Acidobacteria	Holophagae	Subgroup_7				0	0	0	0	0	0	0	0	0	0	0	0	0	0	0	0	0	0	0	0	0	0	0	0	0	0.000159859	0	0	0	0	0	0	0	0	0	0	0	0	0	0	0	0.000159859
OTU_452	452	Bacteroidetes	Flavobacteriia	Flavobacteriales	Flavobacteriaceae	Flavobacterium		0	0	0	0	0	0	0	0	0	0	0	0	0	0	0	0	0	0	0	0	0	0	0	0	0	0	0	0	0.000159859	0	0	0	7.99297e-05	0	0	0	0	0	0	0.000159859	0	7.99297e-05
OTU_873	873	Proteobacteria	Deltaproteobacteria	Myxococcales	Sandaracinaceae			0	0	0	0	0	0	0	0	0	0	0	0	0	0	0	0	0	0	0	0	0	0	0	0	0	0	0	7.99297e-05	0	0	0	0	0	0	0	0	0	0	0	0	0.000159859	0
OTU_1101	1101	Proteobacteria	Deltaproteobacteria	Myxococcales	Haliangiaceae	Haliangium		0	0	0	0	0	0	0	0	0	0	0	0	0	0	0	0	0	0	0	0	0	0	0	0	0	0	0	0	0	0	0	0	0	0	0	0	0	0	0.000399648	0	0	0
OTU_1679	1679	Proteobacteria	Betaproteobacteria	Rhodocyclales	Rhodocyclaceae	Azovibrio		0	0	0	0	0	0	0	0	0	0	0	0	0	0	0	0	0	0	0	0	0	0	0	0	0	0	0	0	0	0	0	0	0	0	0	0	0	0	0	0	0	0
OTU_22	22	Proteobacteria	Alphaproteobacteria	Rhizobiales	Rhizobiaceae	Rhizobium		0	0	0.00519543	0	0	0	0	0	0.000399648	0	0.000239789	0.00247782	0.000559508	0.000319719	0.000959156	0.00263768	0.000159859	0.000639437	0.000559508	0.0576293	0.00311726	0.0131085	0.000319719	0.00335705	0.0764128	0.0119095	0.0127088	0.0151067	0.0149468	0.00679402	0.00375669	0.0108704	0.0127887	0.00567501	0.0127887	0.00423627	0.00311726	0.00311726	0.00231796	0.00183838	0.000799297	0.00127887
OTU_3998	3998	Proteobacteria	Alphaproteobacteria	Rhodospirillales	unidentified_Rhodospirillales	Reyranella		0	0	0	0	0.00383662	0	0	0.000159859	0	0	0	0.000719367	0.000719367	0	0.000799297	0.00167852	0	0.0013588	0.000159859	0	0.000239789	7.99297e-05	0	0.000239789	0	0	0	0	0.000239789	0	0	0	0.000159859	0	0.000159859	0	0	7.99297e-05	0.00191831	0.00111902	0.00391655	0.00255775
OTU_92	92	Actinobacteria	unidentified_Actinobacteria	Micromonosporales	Micromonosporaceae	Actinoplanes		0	0	0	0	0	0	0	0	0.0029574	0	0.000159859	0.000159859	0.000159859	0.00223803	7.99297e-05	0.000719367	0	7.99297e-05	7.99297e-05	0.00175845	0.00271761	0	7.99297e-05	0.000319719	0.000319719	0.00111902	0.000319719	0.000639437	0	0.000399648	0.000399648	0.000559508	0.00167852	7.99297e-05	0.000239789	0	0.00111902	0.0013588	0.00151866	0.00143873	0.000639437	0.000559508
OTU_1843	1843	Proteobacteria	Betaproteobacteria	Burkholderiales	Oxalobacteraceae	Massilia		0	0	0	0	0	0.000319719	0.000719367	0.0021581	0.000399648	0.000239789	0.000319719	7.99297e-05	0.000319719	7.99297e-05	0.000159859	0.000159859	0.000239789	0.000239789	0	0.00207817	0.00327712	0.000959156	0.000159859	0.000319719	0.000479578	0.000959156	0.00103909	0.000959156	0.000239789	0.000559508	0.00447606	0.000319719	0.000239789	0.000239789	0.000319719	0.000879226	0.000959156	0	0.000639437	0.000399648	0.000399648	0.000479578
OTU_1122	1122	Proteobacteria	Alphaproteobacteria	Caulobacterales	Caulobacteraceae	Phenylobacterium		0	0	0	0	0	0	0	0	0.000879226	0	0	7.99297e-05	0.000159859	0	0.000319719	0	0	0	7.99297e-05	0	0.000719367	0	0	0	0	0	0	0	0	0	0	0	7.99297e-05	0.000159859	0	0	0.000159859	0.000159859	0.00103909	0.00103909	0.00127887	0.00119894
OTU_487	487	Acidobacteria	Holophagae	Subgroup_7				0	0	0	0	0	0	0	0	0	0	7.99297e-05	0	0	0	0	7.99297e-05	0	0.000159859	7.99297e-05	0	0	0	0	0	0	0	0	0	0	0	0	0	0	0	0	0	0.000159859	7.99297e-05	0.00191831	0.00167852	0.00143873	0.00287747
OTU_1789	1789	Proteobacteria	Betaproteobacteria	Burkholderiales	Oxalobacteraceae			0	0	0	0	0	7.99297e-05	0	0	0.000559508	0.00871233	0	0.000319719	7.99297e-05	0	7.99297e-05	0.0043162	0	0	7.99297e-05	0	0	0.000239789	0	0	7.99297e-05	7.99297e-05	0.000159859	0	0.000399648	0	0	0	7.99297e-05	0.000479578	0	7.99297e-05	0.000399648	0	0.000879226	0.000879226	0.000239789	0.000799297
OTU_216	216	Proteobacteria	Gammaproteobacteria	Xanthomonadales				0	0	0	0	0	0	0	0	0	0	0	0	0	0	7.99297e-05	0	0	0	0	0	0	0	0	7.99297e-05	0	0	7.99297e-05	7.99297e-05	0	0	7.99297e-05	7.99297e-05	0	0	0	0	0	7.99297e-05	0.00151866	0.000959156	0.00175845	0.00191831
OTU_574	574	Proteobacteria	Alphaproteobacteria	Rhizobiales	Hyphomicrobiaceae	Devosia		0	0	0	0.000319719	0	0	0	0	0.00159859	0	0	0.000319719	0.00111902	0	0.00143873	0	0	0.000159859	0	0.000159859	7.99297e-05	7.99297e-05	0	0	0.00127887	0	0	0.000159859	0.000319719	0	0	0.000399648	0.000559508	0.000319719	0.000479578	7.99297e-05	0	7.99297e-05	0.000319719	0.000239789	0.000159859	0.000319719
OTU_152	152	Proteobacteria	Deltaproteobacteria	Bdellovibrionales	Bacteriovoracaceae	Peredibacter		0	0	0	0	0	0	0	0	0	0	0	0.000319719	0.000159859	0.000159859	7.99297e-05	0	0	7.99297e-05	0	0.000479578	0.000559508	0	0	0	7.99297e-05	0.000159859	0	0	0	0	0.000159859	0.000159859	0	0.000639437	0	0	0.000239789	0.00831268	0.000239789	0.000479578	0.000399648	0.000479578
OTU_173	173	Proteobacteria	Alphaproteobacteria	Caulobacterales	Hyphomonadaceae	Hirschia		0	0	0	0	0	0	0	0	0	0	0	0.000159859	0	0	7.99297e-05	0	0	0	0	0	0	0	0	0	0	7.99297e-05	0	0	0	0	0	0	0	7.99297e-05	0	0	0	0	0.000159859	0.000319719	0.000879226	0.000559508
OTU_992	992	Proteobacteria	Alphaproteobacteria	Sphingomonadales				0	0	0	0	0	0	0	0	0	0	0	0	0	0	0	0	0	0	0	0.000399648	0	0	0	0	0.000159859	0	7.99297e-05	7.99297e-05	7.99297e-05	0	0	0.000399648	0.000159859	0.00223803	0	0	0	0	0.000239789	7.99297e-05	7.99297e-05	0.000159859
OTU_567	567	Proteobacteria	Gammaproteobacteria	Xanthomonadales	Xanthomonadaceae	Tahibacter		0	0.00463592	0	0	0	0	0	0	0	0	0	0	0	0	0	7.99297e-05	0	0	0	0.000159859	0	0	0	0	0	0	0	0	0.000239789	0	0	0	7.99297e-05	0	0	0	0	0	0.000319719	7.99297e-05	7.99297e-05	0.000719367
OTU_284	284	Actinobacteria	unidentified_Actinobacteria	Micrococcales	Intrasporangiaceae			0	0	0	0	0	0	0	0	0	0	0	7.99297e-05	0	0	0	0	0	7.99297e-05	0	0	0	0	7.99297e-05	0	0	0	0	0	0	7.99297e-05	7.99297e-05	0	7.99297e-05	0	0	0	0	0	7.99297e-05	0	0.000159859	0.000399648
OTU_450	450	Proteobacteria	Betaproteobacteria	Burkholderiales				0	0	0	0.00751339	0	0	0	0	0	0	0	0	0	0	7.99297e-05	0	0	0	0	0	0	0	0	7.99297e-05	0	0	0	0	0	0	0	0	0	0	0	0	0	0	0	0	0	0
OTU_414	414	Proteobacteria	Alphaproteobacteria	Caulobacterales	Caulobacteraceae	Caulobacter		0	0	0	0	0	0	0	0	0	0	7.99297e-05	7.99297e-05	7.99297e-05	0	7.99297e-05	0	0	0	7.99297e-05	0	0	0	0	0	0	0	0	0	0	0	0	0	0.000159859	0	0	0	0	0	0.000159859	7.99297e-05	0.000479578	7.99297e-05
OTU_294	294	Acidobacteria	unidentified_Acidobacteria	Subgroup_4	unidentified_Acidobacteria	Blastocatella		0	0	0	0	0	0	0	0	0	0	0	0	0	0	0	0	0	0	0	0	0	0	0	0	0	0	0.000159859	0	0	0	0	0	0	0	0	0	0	0	0	0	0	7.99297e-05
OTU_318	318	Bacteroidetes	Flavobacteriia	Flavobacteriales	Flavobacteriaceae	Flavobacterium	Flavobacterium_cauense	0	0	0	0	0	0	0	0	0	0	0	0	0	0	7.99297e-05	0	0	0.000159859	0	0	0	0	0	0	0	0	0	7.99297e-05	0	0	0	0	0	0	0	0	7.99297e-05	0	0.000319719	7.99297e-05	0.000879226	0.000239789
OTU_732	732	Proteobacteria	Betaproteobacteria	Burkholderiales	Comamonadaceae			0	0	0	0	0	0	0	0	0	0	0	0	0	0	0	0	0	0	0	0	0	0	0	0	7.99297e-05	0	0	7.99297e-05	0	0	0	0	0	0	0	0	0	0	0	0.000159859	0	7.99297e-05
OTU_3048	3048	Acidobacteria	unidentified_Acidobacteria	Subgroup_4	unidentified_Acidobacteria	Blastocatella		0	0	0	0	0	0	0	0	0	0	0	0	7.99297e-05	0	0	0	0	0	0	0	0	0	0	0	0	0	0	0	0	0	0	0	0	0	0	0	0	0	0	0	7.99297e-05	0
OTU_1100	1100	Proteobacteria	Alphaproteobacteria	Rhodobacterales	Rhodobacteraceae	Gemmobacter		0	0	0	0	0	0	0	0	0	0	0	0.000159859	0	0	0	0	0	7.99297e-05	0	0	0	0	0	0	0	0	0	0	0	0	0	0	0	0	0	0	0	0	0	0	0	0
OTU_3973	3973	Acidobacteria	unidentified_Acidobacteria	Subgroup_6				0	0	0	0	0	0	0	0	0	0	0	0	0	7.99297e-05	0	0	0	0	0	0	0	0	0	0	0	0	0	0	0	0	0	0	0	0	0	0	0	0	0	0	0	0
OTU_837	837	Proteobacteria	Deltaproteobacteria	Myxococcales	Blfdi19			0	0	0	0	0	0	0	0	0	0	0	0	0	0	0	0	0	0	0	0	0	0	0	0	0	0	0	0	0	0	0	0	0	0	0	0	0	0	0.000159859	7.99297e-05	7.99297e-05	0.000159859
OTU_930	930	Bacteroidetes	Sphingobacteriia	Sphingobacteriales	Saprospiraceae			0	0	0	0	0	0	0	0	0	0	0	0	0	0	0	0	0	0	7.99297e-05	0	0	0	0	0	0	0	0	0	0	0	0	0	0	0	0	0	0	0	0	0	0	0
OTU_6	6	Proteobacteria	Betaproteobacteria	Burkholderiales	Alcaligenaceae			0.0628247	0.0970346	0.249301	0.031812	0.0666613	0.0254976	0.0848054	0.0426824	0.0114299	0.0366078	0.0127088	0.0130285	0.0365279	0.0278155	0.032931	0.0159859	0.103349	0.0358085	0.00223803	0.00239789	0.00399648	0.000719367	0.000959156	0.00199824	0.00223803	0.00239789	0.00375669	0.0021581	0.00271761	0.0160659	0.00519543	0.000399648	0.00663416	0.00311726	0.00351691	0.00167852	0.00503557	0.0435617	0.000719367	0.0013588	0.000559508	0.000959156
OTU_61	61	Proteobacteria	Betaproteobacteria	Burkholderiales	Oxalobacteraceae	Massilia		0	0.00719367	0	0	0	0.00255775	0.00783311	0.00311726	0.0107106	0.0072736	0.00439613	0.000879226	0.00183838	0.000239789	0.000559508	0.00303733	0.00567501	0.000239789	0.00351691	0.00551515	0.0317321	0.00199824	0.00983135	0.00671409	0.00319719	0.00343698	0.00631444	0.00175845	0.000399648	7.99297e-05	0	0.00127887	0.0013588	0.000319719	0.000799297	0.000239789	0.000879226	0.0051155	0.00167852	0.00167852	0.00103909	0.000719367
OTU_1674	1674	Proteobacteria	Gammaproteobacteria	Pseudomonadales	Pseudomonadaceae			0.042043	0	0	7.99297e-05	0	0.000799297	0.00711374	0.00335705	0	0	0.000319719	0.000479578	0.000399648	0.000799297	0.000879226	0.00663416	7.99297e-05	0.000559508	0.000799297	0.0197426	0.0279754	0.00223803	0.00335705	0.00255775	0.00167852	0.000959156	0.00423627	0.00111902	0.000159859	0.00191831	0.00143873	0.00183838	0.00183838	0.00167852	0.00111902	0.00271761	0.00239789	0.000559508	0.000479578	0.000319719	0.00119894	7.99297e-05
OTU_147	147	Bacteroidetes	Flavobacteriia	Flavobacteriales	Flavobacteriaceae	Chryseobacterium	Chryseobacterium_defluvii	0.00983135	0	0	0	0.0156662	0	0.000319719	0	0.00175845	0	7.99297e-05	0.000799297	7.99297e-05	0	0.000399648	0.000239789	0	7.99297e-05	0	0.000639437	0.000159859	0	0.000159859	0.000559508	0.00839261	0.000559508	0.000399648	0.00463592	0.000239789	7.99297e-05	0.000319719	0	0.000479578	0.000319719	0.00711374	7.99297e-05	0.000159859	0.000719367	0.000559508	0.000159859	0.000559508	0.000639437
OTU_134	134	Acidobacteria	Holophagae	Subgroup_10	ABS-19			0	0	0	0	0	0	0	0	0	0	0.000319719	0	7.99297e-05	0	0	0	0	0.000159859	0	0	0	0	0	0	0	7.99297e-05	0	0	0	0	0.000159859	0	0	0	0	0	7.99297e-05	0	0.00191831	0.00127887	0.00103909	0.00311726
OTU_98	98	Proteobacteria	Alphaproteobacteria	Caulobacterales	Caulobacteraceae	Brevundimonas		0	0	0.000239789	0.000159859	0	0	0	0	0	0	0.000239789	0.000799297	0.000399648	0.000159859	0.000159859	0.000479578	7.99297e-05	0.00303733	0	0.00103909	0	0.000479578	7.99297e-05	0.000879226	0.00271761	0.00415634	0.000399648	0.00223803	0.000159859	0	0.000879226	7.99297e-05	0.000639437	0.000799297	7.99297e-05	0	0	7.99297e-05	0.000639437	0.000559508	0.000319719	0.000639437
OTU_277	277	Actinobacteria	unidentified_Actinobacteria	Micrococcales	Cellulomonadaceae	Cellulomonas	Cellulomonas_hominis	0	0.00663416	0	0	0	0	7.99297e-05	0	0	0	0	0	7.99297e-05	0	0	7.99297e-05	7.99297e-05	0	0	7.99297e-05	0	0	0	0	7.99297e-05	0	0	0	0.000159859	0	0	0.000239789	0	0	0	0	0	7.99297e-05	0.000639437	0.00111902	0.000799297	0.000319719
OTU_4635	4635	Proteobacteria	Gammaproteobacteria	Pseudomonadales	Pseudomonadaceae	Pseudomonas		0.000239789	0	0	0	0	0	0	0	0	0	0.000159859	0	7.99297e-05	0	0	7.99297e-05	0	7.99297e-05	0	0	0	0	7.99297e-05	0.000239789	7.99297e-05	7.99297e-05	0	0	7.99297e-05	0.000719367	0.000239789	0.00375669	0	0.00183838	0.00143873	0	0.00655423	0	0	0	0.000159859	0
OTU_1386	1386	Proteobacteria	Gammaproteobacteria	Xanthomonadales	unidentified_Xanthomonadales	Steroidobacter		0	0	0	0	0	0	0.00231796	0	0	0	0	7.99297e-05	7.99297e-05	0	0	0.000159859	0	7.99297e-05	0	0	0.00103909	7.99297e-05	0	7.99297e-05	0.000159859	0.000319719	0	7.99297e-05	0	0	0	7.99297e-05	0	0.000159859	0	0	0.000479578	0	0.00127887	0.000959156	0.0021581	0.00103909
OTU_252	252	Bacteroidetes	Cytophagia	Cytophagales	Cytophagaceae	Adhaeribacter		0	0	0	0	0	0	0	0	0	0	0	0	0	0	0.000159859	7.99297e-05	0	0	0	0	0	0	0	0	7.99297e-05	7.99297e-05	0	7.99297e-05	0	0	0	0	0	0	0	7.99297e-05	7.99297e-05	7.99297e-05	0.00119894	0.00159859	0.00287747	0.00151866
OTU_4173	4173	Proteobacteria	Alphaproteobacteria	Sphingomonadales	Sphingomonadaceae			0	0	0	0	0	0	0.00183838	0	0	0	0	0	0	0	0	0	0	0	0	0	7.99297e-05	0	0	0	0	0	0	0	0	0	0	0	0	0	0.000239789	0	0	0	0.000559508	0.000879226	0.000159859	0.00159859
OTU_513	513	Nitrospirae	Nitrospira	Nitrospirales	Nitrospiraceae	unidentified_Nitrospiraceae	Nitrospira_sp.	0	0	0	0	0	0	0	0	0	0	0	0	0	0	0.000159859	0	0	7.99297e-05	0.000159859	7.99297e-05	0	0	0	0	0	0	7.99297e-05	7.99297e-05	0	0	0	0	0.000239789	0	7.99297e-05	0	7.99297e-05	0	0.000719367	0.000799297	0.000879226	0.000559508
OTU_472	472	Gemmatimonadetes	unidentified_Gemmatimonadetes	AT425-EubC11_terrestrial_group				0	0	0	0	0	0	0	0	0	0	0	0	0	0	0	0	0	0	0	0.000239789	0	0	0	0	0	0	0	0	0	0	0	0	7.99297e-05	0	0	0	0	0	0.000399648	0.000559508	7.99297e-05	0.000559508
OTU_560	560	Bacteroidetes	Sphingobacteriia	Sphingobacteriales	Chitinophagaceae			0	0	0	0	0	0	0	0	0	0	0	7.99297e-05	7.99297e-05	0	0	0	0	7.99297e-05	0	7.99297e-05	0	0	0	0.000159859	0	7.99297e-05	0	0	0.000159859	0	0	0	7.99297e-05	0	0	0	7.99297e-05	0.000159859	0.000879226	0.000399648	0.000239789	0.000799297
OTU_612	612	Proteobacteria	Deltaproteobacteria	Bdellovibrionales	Bdellovibrionaceae			0	0	0	0	0	0	0	0	0	0	0	7.99297e-05	7.99297e-05	0	7.99297e-05	0.000159859	0	0	0	0	0.000399648	0	0	0	0	0	0	7.99297e-05	0	0	7.99297e-05	0	0	0	0	0	7.99297e-05	0.000239789	0.000239789	0.000559508	0.000319719	7.99297e-05
OTU_2667	2667	Proteobacteria	Gammaproteobacteria	Xanthomonadales	Xanthomonadaceae	Arenimonas		0	7.99297e-05	0	0	0	0	0	0	0	0	0	0	0	0	0	0	0	0	0	0	0	0	0	0	0	7.99297e-05	0	7.99297e-05	7.99297e-05	0	0	0	0	0	0	0	0	0	0.000639437	0.000799297	0.000319719	0.00175845
OTU_4535	4535	Acidobacteria	Holophagae	Subgroup_10	ABS-19			0	0	0	0	0	0	0	0	0	0	0	0	0	0	0	0	0	0	0	0	0	0	0	0	0	0	7.99297e-05	0	0	7.99297e-05	0	0	0	0	7.99297e-05	0	0	0	0.000479578	0.000479578	7.99297e-05	0.000719367
OTU_1830	1830	Proteobacteria	Gammaproteobacteria	Oceanospirillales	Oceanospirillaceae	Pseudospirillum		0	0	0	0	0	0	0	0	0	0	0	0	0	0	0	0	0	0	0	0	0	0	0	0.000239789	7.99297e-05	0.000159859	0	0	0	0	0	7.99297e-05	0	0.000319719	0	0	0	0	0.000319719	7.99297e-05	7.99297e-05	0.000159859
OTU_290	290	Proteobacteria	Alphaproteobacteria	Rhizobiales				0	0	0	0	0	0	0	0	0	0	0	0	0	0	0	0	0	0	0	0	0	0	0	0	0	0	0	0	0	0	0	0	0	0	0	0	0	0	0.000159859	7.99297e-05	0	0
OTU_924	924	Acidobacteria	unidentified_Acidobacteria	Subgroup_6				0	0	0	0	0	0	0	0	0	0	0	0	0	0	0	0.000159859	0	0	0	0	0	0	0	0	0	0	0	0	0	0	0	0	0	0	0	0	0	0	7.99297e-05	0	7.99297e-05	0
OTU_875	875	Chlorobi	Chlorobia	Chlorobiales	SJA-28			0	0	0	0	0	0	0	0	0	0	0	0	0	0	0	0	0	0	0	0	0	0	0	0	0	0	0	0	0	0	0	0	0	0	0	0	0	0	0	0	7.99297e-05	0
OTU_2064	2064	Proteobacteria	Betaproteobacteria	Rhodocyclales	Rhodocyclaceae	Candidatus_Accumulibacter		0	0	0	0	0	0	0	0	0	0	0	0	0	0	0	0	0	0	0	0	0	0	0	0	0	0	0	0	0	0	0	0	0	0	0	0	0	0	0	0.000799297	7.99297e-05	0
OTU_1766	1766	Gemmatimonadetes	unidentified_Gemmatimonadetes	Gemmatimonadales	Gemmatimonadaceae			0	0	0	0	0	0	0	0	0	0	0	0	0	0	0	0	0	0	0	0	0	0	0	0	0	0	0	0	0	0	0	0	0	0	0	0	0	0	0	7.99297e-05	0	7.99297e-05
OTU_1520	1520	Proteobacteria	Deltaproteobacteria	Desulfuromonadales				0	0	0	0	0	0	0	0	0	0	0	0	0	0	0	0	0	0	0	0	0	0	0	0	0	0	0	0	0	0	0	0	7.99297e-05	0	0	0	0	0	0	0	0	0
OTU_2869	2869	Proteobacteria	Gammaproteobacteria	Enterobacteriales	Enterobacteriaceae			0.0140676	0.000719367	0.00223803	0.000959156	0	0.00207817	0.00959156	0.00375669	7.99297e-05	0.000719367	0.00583487	0.00159859	0.00103909	0.00119894	0.00671409	0.000239789	0.000159859	0.00447606	0.000639437	0.0162257	0.0271761	0.00199824	0.0591479	0.0510751	0.00855247	0.0203021	0.0108704	0.00239789	0.00143873	0.00207817	0.144673	0.0675406	0.0430821	0.00983135	0.00631444	0.000559508	0.0230197	0.0177444	0.000159859	0.000399648	7.99297e-05	0.000239789
OTU_51	51	Proteobacteria	Betaproteobacteria	Burkholderiales	Comamonadaceae			0	0	0	0	0	0	0	0	0	0	7.99297e-05	7.99297e-05	7.99297e-05	7.99297e-05	0	0.000159859	0	0.000399648	7.99297e-05	0.00463592	0.00703381	7.99297e-05	7.99297e-05	0.000799297	0.000559508	0.000159859	7.99297e-05	0.000559508	0.000239789	0	0.0145472	0	0.0150268	0.00383662	0.000159859	0	0.00239789	0	7.99297e-05	7.99297e-05	0	7.99297e-05
OTU_146	146	Acidobacteria	Holophagae	Subgroup_7				0	0	0	0	0	0	0	0	0	0	0	0	7.99297e-05	0.000159859	0	0	0	7.99297e-05	0	0	0	0	0	0	0	0	7.99297e-05	0	0	7.99297e-05	0	0	0	0	0	0	0.000159859	0	0.0021581	0.00167852	0.000879226	0.00327712
OTU_136	136	Actinobacteria	Thermoleophilia	Gaiellales	Gaiellaceae	Gaiella		0	0	0	0	0	0	7.99297e-05	0	0	0.00663416	0	0	0	0	0.000159859	0	0	0	0	0	0	0	0	0	0	7.99297e-05	0	7.99297e-05	0	0	0	0	7.99297e-05	0	0	0	7.99297e-05	7.99297e-05	0.00327712	0.00247782	0.00223803	0.00167852
OTU_157	157	Proteobacteria	Alphaproteobacteria	Sphingomonadales	Sphingomonadaceae			0	0	0	0	0	0	0.000399648	0.000159859	0.00695388	0	0	0.000239789	0.000639437	0.00223803	7.99297e-05	0	0	0	0	0.000399648	0.000159859	0	0	7.99297e-05	0.000239789	0.000639437	0.000879226	7.99297e-05	0	0	7.99297e-05	0	0	0	0	0	0	0	0.00183838	0.00159859	0.000399648	0.00127887
OTU_156	156	Actinobacteria	unidentified_Actinobacteria	Propionibacteriales	Nocardioidaceae	Nocardioides		0	0	0	0.00111902	0	0	0	0	0.0029574	0	0	0	7.99297e-05	0	7.99297e-05	0	0	0	7.99297e-05	0	0	0	0	0	0	7.99297e-05	0.00103909	0	0	0	0.000479578	0	0	0	0	0	7.99297e-05	0.000159859	0.00207817	0.00111902	0.00239789	0.000479578
OTU_158	158	Proteobacteria	Alphaproteobacteria	Rhodospirillales	Acetobacteraceae			0	0	0	0	0	0	0	0	0	0	0	0	0	0	7.99297e-05	0	0	0	0	0	0	0	0	0	0	0	0.000239789	0	0	0	0	0	0	0	0	0	0	0	0.000159859	0.000319719	7.99297e-05	0.000159859
OTU_1487	1487	Proteobacteria	Betaproteobacteria	Burkholderiales	Burkholderiaceae	Lautropia		0.00927184	0	0	0	0	7.99297e-05	0	0	0.00231796	0	7.99297e-05	0.000479578	0	0	0	0	0	0	0.000239789	0	0	7.99297e-05	0	0	0	0.000159859	0	0	0.000399648	0	0	0	7.99297e-05	0	0	0	0	0	0.000239789	0.000479578	0.000239789	0.000159859
OTU_1139	1139	Proteobacteria	Betaproteobacteria	Burkholderiales	Oxalobacteraceae	Noviherbaspirillum		0	0	0	0	0	0	0	0	0	0	0	0	7.99297e-05	0	0	0	0	0	0	0	0	0	0	0	0	0.000159859	7.99297e-05	0.000159859	0	0.000159859	0	0	0	0	0	0	7.99297e-05	0	0.00159859	0.000559508	0.000799297	0.000879226
OTU_337	337	Proteobacteria	Alphaproteobacteria	Rhizobiales	Hyphomicrobiaceae	Devosia		0	0	0	0	0	0	0	0	0	0	0	0	0.000159859	0	7.99297e-05	0	0	7.99297e-05	0	0	0.000159859	0	0	7.99297e-05	0.000239789	0	0	0	0	0	7.99297e-05	0	0	0	0.000479578	0	0	7.99297e-05	0.000479578	0.000399648	0.000399648	0.00127887
OTU_143	143	Proteobacteria	Betaproteobacteria	Rhodocyclales	Rhodocyclaceae	Uliginosibacterium		0	0	0	0	0	0	0	0	0	0	0.000159859	0	0	0	0	0	0	7.99297e-05	0	0.00167852	0	0	0	0	7.99297e-05	0	7.99297e-05	0	0	0	7.99297e-05	0	0	0	0	0	0	0.000159859	0.000319719	0.00271761	0.00167852	0.000239789
OTU_362	362	Bacteroidetes	Flavobacteriia	Flavobacteriales	NS9_marine_group			0	0	0	0	0	0	0	0	0	0	0	0	7.99297e-05	7.99297e-05	7.99297e-05	0	0	7.99297e-05	0.000159859	0	7.99297e-05	0	0	0	0	0.000159859	0	0	7.99297e-05	0	7.99297e-05	0	0.000159859	0	0	0	0.000159859	0.000239789	0.000639437	0.000239789	0.00103909	0.000239789
OTU_228	228	Proteobacteria	Alphaproteobacteria	Caulobacterales	Caulobacteraceae	Caulobacter		0	0	0	0	0	0	0	0	0	0	0	7.99297e-05	0	0	0	0	0	0	0	0.000879226	0	0	0	0	0.000159859	0	0	0	0	0	0.000479578	0.000239789	0	7.99297e-05	7.99297e-05	7.99297e-05	0.000959156	0	0.000319719	7.99297e-05	0	0.000319719
OTU_437	437	Proteobacteria	Deltaproteobacteria	Oligoflexales				0	0	0	0	0	0	0	0	0	0	0	7.99297e-05	7.99297e-05	0	0.000159859	0.000159859	0	7.99297e-05	0	0	0	0	0	0	0.000159859	7.99297e-05	0	0	0.000159859	0	7.99297e-05	0	7.99297e-05	0.000159859	0	0	7.99297e-05	0.000159859	0.000879226	0.000559508	0.000479578	0.000639437
OTU_367	367	Proteobacteria	Betaproteobacteria	TRA3-20	unidentified_TRA3-20	unidentified_TRA3-20	beta_proteobacterium_LX29	0	0	0	0	0	0	0	0	0	0	0	0	7.99297e-05	0	7.99297e-05	0	0	0	0	0	0	0	0	0	0	0	0	7.99297e-05	0	0	0	0	7.99297e-05	0	0	0	0	0	0.00119894	0.000399648	0.00111902	0.0013588
OTU_195	195	Proteobacteria	Betaproteobacteria					0	0	0	0	0	0	0	0	0	0	0	0	0	0	0	0	0	0	0	0	0	0	0	0	0	0	7.99297e-05	0	0	0	0	0	0	0	0	0	0	0	0.000639437	0.000399648	7.99297e-05	0.000799297
OTU_247	247	Bacteroidetes	Sphingobacteriia	Sphingobacteriales	Saprospiraceae			0	0	0	0	0	0	0	0	0.000319719	0	0	0	0	0	7.99297e-05	0	0	0	0	0	0	0	0	7.99297e-05	0.000159859	0	0	7.99297e-05	0	0	7.99297e-05	7.99297e-05	0	0.000319719	0	0	7.99297e-05	0	0	7.99297e-05	0.000239789	7.99297e-05
OTU_640	640	Proteobacteria	Gammaproteobacteria	Xanthomonadales	unidentified_Xanthomonadales			0	0	0	0	0	0	0	0	0	0	0	0	7.99297e-05	0	0	0	0	0	0	0	0	0	0	0	0	0.000159859	0	0	0	7.99297e-05	0	0	0	7.99297e-05	0	0	0	7.99297e-05	0.000239789	0.000159859	0.00111902	0
OTU_525	525	Actinobacteria	Acidimicrobiia	Acidimicrobiales				0	0	0	0	0	0	0	0	0	0	0	7.99297e-05	7.99297e-05	0	7.99297e-05	0	0	0	0	0	0	0	0	0	0	0	0	0	0	0	0	0	0	0	0	0	0	0	0.000399648	0.000159859	0.000239789	0.000639437
OTU_325	325	Bacteroidetes	Sphingobacteriia	Sphingobacteriales	Saprospiraceae			0	0	0	0	0	0	0	0	0	0	0	0	7.99297e-05	0	0	0	0	0	7.99297e-05	0	0	0	0	0	0	0	0	0	0	0	0	0	0	0	0	0	0	7.99297e-05	7.99297e-05	7.99297e-05	0.000159859	0.000479578
OTU_629	629	Bacteroidetes	Cytophagia	Cytophagales	Cytophagaceae	Ohtaekwangia		0	0	0	0	0	0	0	0	0	0	0	7.99297e-05	0	0	7.99297e-05	0	0	0	0	0	0.000159859	0	0	0	0	0	0	7.99297e-05	0	0	0	7.99297e-05	0	0	0	0	0.000159859	0.000159859	0.000239789	0.000159859	0.000319719	0.000239789
OTU_492	492	Proteobacteria	Alphaproteobacteria	Rhodospirillales	Acetobacteraceae	Craurococcus		0	0	0	0	0	0	0	0	0	0	0	0	0	0	7.99297e-05	0	0	0	0	0	0.000159859	0	0	0	0	0	0	0	0	0	0	0	7.99297e-05	0	0	0	0	0	0	0.000159859	0	7.99297e-05
OTU_495	495	Proteobacteria	Deltaproteobacteria	Bdellovibrionales	Bdellovibrionaceae	Bdellovibrio		0	0	0	0	0	0	0	0	0	0	0	0	7.99297e-05	0	0	0	0	0	0	0	0	0	0	0	0	0	0	0	0	0	0	0	0	0	0	0	0	0	0.000559508	7.99297e-05	0	0.000239789
OTU_770	770	Proteobacteria	Gammaproteobacteria	34P16				0	0	0	0	0	0	0	0	0	0	0	0	0	0	7.99297e-05	0	0	0	7.99297e-05	0	0	0	0	7.99297e-05	0	0	0	7.99297e-05	0	0	0	0	0	0.000239789	0	0	0	0	0	0	0	0
OTU_740	740	Latescibacteria						0	0	0	0	0	0	0	0	0	0	0	0	0	0	0	0	0	0	0	0	0	0	0	0	0	0	0	0	0	0	0	0	0	0	0	0	0	0	0.000319719	0	7.99297e-05	0.000239789
OTU_727	727	Proteobacteria	Alphaproteobacteria	Rhodospirillales	Rhodospirillaceae			0	0	0	0	0	0	0	0	0	0	0	0	0	0	0	0	0	0	0	0	0	0	0	0	0	0	0	0	0.000239789	0	0	0	0	0.000159859	0	0	0	0	0	0	7.99297e-05	7.99297e-05
OTU_3068	3068	Proteobacteria	Alphaproteobacteria	Sphingomonadales	Sphingomonadaceae	Sphingomonas		0	0	0	0	0	0	0	0	0	0	0	0	0	0	0	0	0	0	0	0	0	0	0	0	0	0	0	0	0	0	0	0	0.000159859	0	0	0	0	0	0	0	7.99297e-05	7.99297e-05
OTU_1203	1203	Proteobacteria	Gammaproteobacteria	WN-HWB-116				0	0	0	0	0	0	0	0	0	0	0	0	0	0	0	0	0	0	7.99297e-05	0	0	0	0	0	0	0	0	0	0	0	0	0	0	0	0	0	0	0	0	0	7.99297e-05	0
OTU_1233	1233	Lentisphaerae	PBS-III-20					0	0	0	0	0	0	0	0	0	0	0	0	0	0	0	0	0	0	7.99297e-05	0	0	0	0	0	0	0	0	0	0	0	0	0	0	0	0	0	0	0	0	0	0	0
OTU_198	198	Gemmatimonadetes	unidentified_Gemmatimonadetes	AT425-EubC11_terrestrial_group				0	0	0	0	0	0	0	0	0	0	0	0	7.99297e-05	0	7.99297e-05	0	0	0	0	0	0	0	0	0	0	7.99297e-05	0.000159859	0	0	0	0	0	7.99297e-05	0	0	0	0.000159859	0	0.00119894	0.00119894	0.000319719	0.00191831
OTU_1891	1891	Proteobacteria	Betaproteobacteria	Burkholderiales	Comamonadaceae			0	0	0	0	0	7.99297e-05	0	0	0.00119894	0	0	0	7.99297e-05	0	0	0	0	0	0	0	0	0	0	0	0	0	0	0	7.99297e-05	0	7.99297e-05	0	0	0	0	0	0.000639437	7.99297e-05	0.000559508	0.000719367	0.000479578	0.00103909
OTU_130	130	Actinobacteria	Acidimicrobiia	Acidimicrobiales				0	0	0	0	0	0	0	0	0	0	0	0	7.99297e-05	7.99297e-05	7.99297e-05	0.00271761	0	0	0	0	0	7.99297e-05	0	0	0	0	0	0	0	0	0	0	7.99297e-05	0	0	0.000159859	0.000159859	7.99297e-05	0.00199824	0.000959156	0.000959156	0.00183838
OTU_206	206	Proteobacteria	Alphaproteobacteria	Sphingomonadales	Erythrobacteraceae	Altererythrobacter		0	0	0	0	0	0	0	0	0	0	0	7.99297e-05	0.000159859	0	7.99297e-05	0	0	0	0	0	0	0	0	0	0	0.000239789	0	7.99297e-05	0	0	0	0.000159859	0	0	0	0	0	7.99297e-05	0.000319719	0.000479578	0.0043162	0.000559508
OTU_552	552	Bacteroidetes	Sphingobacteriia	Sphingobacteriales	env.OPS_17			0	0	0	0	0	0	0	0	0	0	7.99297e-05	0	0.000159859	7.99297e-05	0	0	0	7.99297e-05	0	0	0	7.99297e-05	0	0	0	0	0	7.99297e-05	7.99297e-05	0	0	0	7.99297e-05	0	0	0	7.99297e-05	7.99297e-05	0.00103909	0.00119894	0.000799297	0.00111902
OTU_222	222	Actinobacteria	Acidimicrobiia	Acidimicrobiales	Acidimicrobiaceae	Illumatobacter		0	0	0	0	0	0	0	0	0.00119894	0	0	0	7.99297e-05	0	0.000159859	0	0	0	0.000159859	0	0	0	7.99297e-05	7.99297e-05	0	0.000159859	0	0	0	0	0	0	0	0	0	0	0	7.99297e-05	0.000639437	0.000479578	0.000639437	0.000479578
OTU_728	728	Acidobacteria	Holophagae	Subgroup_10	ABS-19			0	0	0	0	0	0	0	0	0	0	0	0	0	0	0	0	0	0	0	0	0	0	0	0	0	0	0	0	0	0	0	0	0	0	0	0	0	0	0.000479578	0.000639437	0.000639437	0.00119894
OTU_852	852	Actinobacteria	Acidimicrobiia	Acidimicrobiales	Acidimicrobiaceae			0	0	0	0	0	0	0	0	0	0	0	7.99297e-05	0	0	0	0	7.99297e-05	0.000159859	0	0	0	0	0	7.99297e-05	0	0	0	0	0	0	0	0	7.99297e-05	0	0	0	0	0	0.000639437	0.000719367	0.000719367	0.00127887
OTU_241	241	Actinobacteria	Acidimicrobiia	Acidimicrobiales	Acidimicrobiaceae	Illumatobacter		0	0	0	0	0	0	0	0	0	0	0	0	0	0	7.99297e-05	0	0	7.99297e-05	0	0	0	0	0	0	7.99297e-05	0	0	7.99297e-05	0	0	0	0	0	7.99297e-05	0	7.99297e-05	7.99297e-05	7.99297e-05	0.000639437	0.000719367	0.000639437	0.000639437
OTU_465	465	Proteobacteria	Deltaproteobacteria	Bdellovibrionales	Bdellovibrionaceae	Bdellovibrio	Bdellovibrio_bacteriovorus	0	0	0	0	0	0	0	0	0.00111902	0	0	0	0	0	0	0	0	7.99297e-05	0	0.000639437	0	0	0	0.000159859	0.00119894	0	0	0	0.000239789	7.99297e-05	0	0.000399648	0.000479578	0.000159859	7.99297e-05	0.000319719	7.99297e-05	0	0.000319719	0.000399648	0.000159859	0.000479578
OTU_407	407	Acidobacteria	unidentified_Acidobacteria	Subgroup_3	unidentified_Acidobacteria	Bryobacter		0	0	0	0	0	0	0	0	0	0	0	0	0	0.000159859	0	0	0	0	0	0	0	0	0	0	0	0	0	0	0	0	0	0	0	0	0	0	0	0	0.000959156	0.000399648	0.000479578	0
OTU_509	509	Proteobacteria	Alphaproteobacteria	Rhodospirillales	Acetobacteraceae	Roseomonas		0	0	0	0	0	0	0	0	0.000879226	0	0	0	0.000639437	0	0	0	0	0	0	0	0.000239789	0	0	0	0	0	0	0	7.99297e-05	0	0	0	0	0	0	0	0	0	0.000639437	0.000479578	0	0.000479578
OTU_389	389	Proteobacteria	Gammaproteobacteria	Xanthomonadales	Xanthomonadaceae			0	0	0	0	0	0	0	0	0	0	0	0	0	0	0	0	0	0	0	0	0	0	0	0	0	0	0	0	0	0	0	0	0	0	0	0	0	0	0.000159859	7.99297e-05	0.000239789	0.000319719
OTU_2482	2482	Bacteroidetes	Cytophagia	Cytophagales	Cytophagaceae	Ohtaekwangia		0	0	0	0	0	0	0	0	0	0	7.99297e-05	7.99297e-05	0	7.99297e-05	7.99297e-05	0	0	0	0	0	0	0	0	0	0	7.99297e-05	0	7.99297e-05	0	0	7.99297e-05	0	0	0	0	0	0	0	0.000159859	0.000239789	0.000319719	0.000159859
OTU_599	599	Gemmatimonadetes	unidentified_Gemmatimonadetes	Gemmatimonadales	Gemmatimonadaceae			0	0	0	0	0	0	0	0	0	0	0	0	0	0	0	0	0	0	0	0	0	0	0	7.99297e-05	0	0	0	0	0	0	0	0	0	0	0	0	0	0	0.000159859	0	0	0.000319719
OTU_3854	3854	Proteobacteria	Betaproteobacteria	Burkholderiales	Comamonadaceae			0	0	0	0	0	0	0	0	0	0	0	0	0	0	7.99297e-05	0	0	0	0	0	0	0	0	0	0	0	0	0	0	0	0	0	7.99297e-05	0	0	0	0	0	0.000239789	0	7.99297e-05	7.99297e-05
OTU_1148	1148	Proteobacteria	Deltaproteobacteria	Oligoflexales				0	0	0	0	0	0	0	0	0	0	0	0	0	0	0	0	0	0	0	0	0	0	0	0	0	0	0	0.000159859	0	0	0	0	0	0	0	0	0	0	0.000239789	0.000239789	0	0.000159859
OTU_1917	1917	Proteobacteria	Gammaproteobacteria	Xanthomonadales	Xanthomonadaceae			0	0	0	0	0	0	0	0	0	0	0	0	0	0	0	0	0	0	0	0	0	0	0	0	0.000159859	0	0	0.000159859	0	0	0	0	0	0	0	0	0	7.99297e-05	0	7.99297e-05	7.99297e-05	0.000159859
OTU_800	800	Proteobacteria	Deltaproteobacteria	Bdellovibrionales	Bdellovibrionaceae	Bdellovibrio		0	0	0	0	0	0	0	0	0	0	0	0	0	0	0	0	0	0	7.99297e-05	0	0	0	0	0	0.000159859	0	0	0	0	0	0	0	0	0	0	0	0	0	7.99297e-05	0	7.99297e-05	7.99297e-05
OTU_980	980	Bacteroidetes	Sphingobacteriia	Sphingobacteriales	Saprospiraceae			0	0	0	0	0	0	0	0	0	0	0	0	0	0	0	0	0	0	0	0	0	0	0	0	0	0	0	0	0	0	0	0	0	0	0	0	0	0	0	0	0	0
OTU_14	14	Proteobacteria	Gammaproteobacteria	Pseudomonadales	Pseudomonadaceae	Pseudomonas		0.00839261	0.00199824	0	0	0.00111902	0.0094317	0.013588	0.00247782	0.000799297	0.00111902	0.00279754	0.0115898	0.00375669	0.0683399	0.00239789	0.012469	0.00207817	0.126768	0.00527536	0.0312525	0.044361	0.0115099	0.178563	0.122372	0.0299736	0.0446008	0.0414036	0.00831268	0.00415634	0.00255775	0.0029574	0.00935177	0.00407641	0.00191831	0.00231796	0.00599472	0.00359683	0.00151866	0.000719367	0.000719367	0.00191831	0.000479578
OTU_53	53	Proteobacteria	Betaproteobacteria	Burkholderiales	Alcaligenaceae			0	0	0	0	0	0	0	0	0	0	0	0	0.000319719	0.000159859	0.000159859	7.99297e-05	0	7.99297e-05	0	0	0	0	0	0	0	0.000239789	7.99297e-05	7.99297e-05	7.99297e-05	0	7.99297e-05	0	0	0	0	0	0.000159859	0.000319719	0.00767325	0.00751339	0.00455599	0.0107106
OTU_356	356	Proteobacteria	Betaproteobacteria	TRA3-20				0	0	0	0	0	0	0	0	0	0	0	7.99297e-05	0	0.00191831	7.99297e-05	0	0	0	0	0	0	0	0	0.000159859	0	0.000159859	7.99297e-05	0	0.000159859	0	0	0	7.99297e-05	0	0	0	7.99297e-05	7.99297e-05	0.00455599	0.00407641	0.00343698	0.00487571
OTU_3721	3721	Proteobacteria	Alphaproteobacteria	Rhizobiales	Phyllobacteriaceae	Mesorhizobium		0	0	0	0	0	0	0	0	0	0	0	0.000159859	0.000159859	0.00111902	0	0.0043162	0	7.99297e-05	0	0.000639437	0.000959156	7.99297e-05	0	0.000159859	0.000319719	0.00127887	7.99297e-05	0.000319719	7.99297e-05	7.99297e-05	0	7.99297e-05	0	0	0	0	0	7.99297e-05	0.00127887	0.00159859	0.00159859	0.00415634
OTU_175	175	Actinobacteria	unidentified_Actinobacteria	Kineosporiales	Kineosporiaceae	Kineosporia		0	0	0	0	0	0	0	0.00223803	0.00119894	0	7.99297e-05	0.000319719	0.000399648	0.000239789	0.000399648	7.99297e-05	7.99297e-05	0.000399648	0.000159859	0.00183838	0.00311726	0.000559508	0	0.000239789	0.00167852	0.00175845	0.000799297	0.00207817	0.000639437	0.00159859	0.00111902	0.000799297	0.00527536	0.00103909	0.00103909	0	0.000959156	0.00735353	0.000239789	0.000159859	0.000159859	0.000319719
OTU_181	181	Proteobacteria	Alphaproteobacteria	Rhizobiales	Xanthobacteraceae	Variibacter		0	0	0	0	0	0	0	0	0	0	0	0	7.99297e-05	0	0	0	0	0	0	0	0	0	0	7.99297e-05	7.99297e-05	0	0	0.000239789	0	0	0	7.99297e-05	0	0	7.99297e-05	0	0	7.99297e-05	0.00207817	0.00175845	0.00167852	0.0029574
OTU_167	167	Proteobacteria	Betaproteobacteria	SC-I-84				0	0	0	0	0	0	0	0	0	0	0	0	0	0	0.000239789	0	0	0	0	0	0	0	0	7.99297e-05	0	0	7.99297e-05	0	0	0	0	0	7.99297e-05	0	0	0	7.99297e-05	0	0.000799297	0.00151866	0.00247782	0.00311726
OTU_164	164	Actinobacteria	unidentified_Actinobacteria	Micrococcales	Microbacteriaceae	Agromyces		0	0	0	0	0	0	0	0	0	0	0.000319719	0.000159859	0	7.99297e-05	7.99297e-05	0	0	7.99297e-05	0	0	0	0	0	0	7.99297e-05	7.99297e-05	0	7.99297e-05	0	0	0	7.99297e-05	0	0	0	0	0	0.000159859	0.0013588	0.0013588	0.00175845	0.000799297
OTU_363	363	Proteobacteria	Gammaproteobacteria	Xanthomonadales				0	0	0	0	0	0	0.000239789	0	0	0	0	7.99297e-05	0	0.00319719	0	0	0	0.000159859	0	0	0	0	0	0	0	7.99297e-05	0	0	0	0	0	0	7.99297e-05	0	0	0	7.99297e-05	0	0.000479578	0.000639437	0.000959156	0.000879226
OTU_480	480	Proteobacteria	Betaproteobacteria					0	0	0	0	0	0	0	0	0	0	0	0	7.99297e-05	0	7.99297e-05	0	0	0	0	0	0	0	0	0	0	0	0	0	0	0	0	0	0	0	0	0	0	0	0.00183838	0.00143873	0.00119894	0.0013588
OTU_4663	4663	Proteobacteria	Betaproteobacteria	Burkholderiales	Oxalobacteraceae			0	0	0.0162257	0	0	0.000159859	0	7.99297e-05	0	0	0	0	0	0	0	0	0	0	0	7.99297e-05	0.000319719	7.99297e-05	0	0	0.000159859	0	0	0	0	0	7.99297e-05	0	0	7.99297e-05	0.000159859	7.99297e-05	0	0	7.99297e-05	7.99297e-05	0	7.99297e-05
OTU_115	115	Proteobacteria	Alphaproteobacteria	Rhodobacterales	Rhodobacteraceae	Paracocccus		0	0	0.00887219	0	0	0	0	0	0	0	0	0	7.99297e-05	0	0	0.00271761	7.99297e-05	0.00143873	0	0	0	0	0	0	0	0	0	0	7.99297e-05	0	0	0	0	0	0	0	0	0	0	0	0	7.99297e-05
OTU_282	282	Proteobacteria	Alphaproteobacteria	Rhodospirillales	unidentified_Rhodospirillales	Reyranella		0	0	0	0	0	0	0	0	0	0	0	0.000319719	0	0	0	0	0	0	0	0	0	0	0	0	0	0	0	0	0.000159859	0	0	0	0	0	0	0	0	0	0.000319719	0.000719367	0.000879226	0.000639437
OTU_238	238	Proteobacteria	Deltaproteobacteria	Bdellovibrionales	Bacteriovoracaceae	Bacteriovorax		0	0	0	0	0	0	0	0	0	0	7.99297e-05	0.000159859	0	0	0.000399648	0	0	0.000159859	0	0.000639437	0	0	0	7.99297e-05	0.00183838	7.99297e-05	0.000559508	0.000239789	0.000159859	0.00175845	0.000479578	0	7.99297e-05	0.0013588	0.000159859	0	0	0.00351691	0.000319719	0.000159859	0.000319719	0.000239789
OTU_4561	4561	Proteobacteria	Alphaproteobacteria	Sphingomonadales	Sphingomonadaceae	Sphingomonas		0	0.000159859	0	7.99297e-05	0	0	0	0	7.99297e-05	0	0	0	0	0	0	0	0	0	0	0	0.000239789	0	0	0	7.99297e-05	0	0	0.000719367	7.99297e-05	0	0	7.99297e-05	0.000399648	0.000159859	0	7.99297e-05	0	0	0.000239789	0.000719367	0.000479578	0.000159859
OTU_529	529	Verrucomicrobia	Spartobacteria	Chthoniobacterales	Chthoniobacteraceae	Chthoniobacter		0	0	0	0	0	0	0	0	0	0	0	0	0	0	7.99297e-05	0	0	0	0	0	0	0	0	0	7.99297e-05	7.99297e-05	0	0.000159859	0	0	0	0	0	0.000159859	7.99297e-05	0	7.99297e-05	0	0.000799297	0.000399648	0.000639437	0.000479578
OTU_235	235	Bacteroidetes	Cytophagia	Cytophagales	Cytophagaceae			0	0	0	0	0	0	0	0	0	0	0	0	0	0	7.99297e-05	0	0	0	0	0	0	0	0.000239789	0	7.99297e-05	0	0	0.000159859	0	0	0	7.99297e-05	0	0.000639437	0	0	0.00143873	0.000159859	0.000239789	0.000319719	0.000959156	7.99297e-05
OTU_243	243	Verrucomicrobia	OPB35_soil_group					0	0	0	0	0	0	0	0	0	0	0	0	7.99297e-05	0	0	0	0	0	0	0	0	0	0	0	0	0	7.99297e-05	0	0	0	7.99297e-05	0	0	0	0	0	0.000159859	0	0.00199824	0.00111902	0.000319719	0.000399648
OTU_1256	1256	Bacteroidetes	Sphingobacteriia	Sphingobacteriales	Saprospiraceae			0	0	0	0	0	0	0	0	0	0	0	0	0	0	0	0	0	7.99297e-05	0	0	0	0	0	0	7.99297e-05	0	0.000159859	7.99297e-05	0	0	0	0	7.99297e-05	0	0	0	7.99297e-05	0	0.000239789	0.000319719	0.000159859	0.000559508
OTU_1265	1265	Acidobacteria	unidentified_Acidobacteria	Subgroup_6				0	0	0	0	0	0	0	0	0	0	0	0	0	0	0	0	0	0	0	0	0	0	0	0	0	0	0	0	0	0	0	0	0	0	0	0	0	0	0.000159859	7.99297e-05	7.99297e-05	0.000159859
OTU_210	210	Gemmatimonadetes	unidentified_Gemmatimonadetes	Gemmatimonadales	Gemmatimonadaceae	Gemmatimonas		0	0	0	0	0	0	0	0	0	0	0	0	0	0	0	0.000159859	0	0	0	0	0	0	0	0	0	0	0	0	0	0	0	0	0	0	0	0	0	0	0.000639437	0.000319719	0.00127887	0.000799297
OTU_828	828	Actinobacteria	unidentified_Actinobacteria	Frankiales				0	0	0	0	0	0	0	0	0	0	0	0	0	0.000399648	0	0	0	0	7.99297e-05	0	0	0	0	0	0	0	0	0	0	0	7.99297e-05	0	0	0	0	0	0	7.99297e-05	0.000399648	0.000399648	0.000399648	0.000399648
OTU_421	421	Proteobacteria	Deltaproteobacteria	Myxococcales	Haliangiaceae	Haliangium		0	0	0	0	0	0	0	0	0	0	0	0	0	0	0	0	0	0	0	0	0	0	0	0	0	0	0	0	0.000159859	0	0	0	0	0	0	0	0	0	0.000319719	0.000559508	0.000479578	0.000559508
OTU_301	301	Proteobacteria	Alphaproteobacteria	Rhizobiales				0	0	0	0	0	0	0	0	0	0	0	0	0	0	0	0	0	0	0	0	0	0	0	0	0	0	0	0	0	0	0	0	0	0.000399648	0	0	0	0	0.000479578	0.000239789	0.000479578	0.000559508
OTU_211	211	Proteobacteria	Deltaproteobacteria	Myxococcales	Polyangiaceae	Byssovorax		0	0	0	0	0	0	0	0	0	0	0	0	7.99297e-05	0	0	0	0	0	0	0	0.000159859	0	0	0	0	0	0	0	7.99297e-05	0	0	0	0	0	0	0	7.99297e-05	0	0.000639437	0.000159859	0.000159859	0.000319719
OTU_699	699	Bacteroidetes	Sphingobacteriia	Sphingobacteriales	Saprospiraceae			0	0	0	0	0	0	0	0	0	0	0	0	0	0	0	0	0	0	0	0	0	0	0	0	0	0	0	0	0	0	0	0	0	0	0	0	7.99297e-05	0.000159859	0.000399648	7.99297e-05	0.000239789	7.99297e-05
OTU_648	648	Chlorobi						0	0	0	0	0	0	0	0	0.000479578	0	0	0	0	0	7.99297e-05	0	0	0	0	0	0	0	0	0	0	0	0	7.99297e-05	0	0	0	0	7.99297e-05	0	0	0	0.000159859	7.99297e-05	0.000479578	0.000239789	7.99297e-05	0.000399648
OTU_444	444	Proteobacteria	Alphaproteobacteria	Rhodospirillales	Rhodospirillaceae			0	0	0	0	0	0	0	0	0	0	0	0	0	0	0	0	0	0	0	0	0	0	0	0	0	0	0	0	0	0	0	0	0	0	0	0	0	0	7.99297e-05	0.000239789	0.000159859	7.99297e-05
OTU_393	393	Gemmatimonadetes	unidentified_Gemmatimonadetes	unidentified_Gemmatimonadetes	S0134_terrestrial_group			0	0	0	0	0	0	0	0	0	0	0	0	0	0	0	0	0	0	0	0	0	0	0	0	0.000159859	0	0	0	0	0	0	0	0	0	0	0	0	0.000159859	0.000239789	0.000399648	0.000319719	0.000239789
OTU_358	358	Proteobacteria	Alphaproteobacteria	Rhodospirillales	Acetobacteraceae			0	0	0	0	0	0	0	0	0	0	0	0	0	7.99297e-05	0	0	7.99297e-05	0	0	0	0	0	0	0	0	0	0	0	0	0	0	0	0	0	0	0	0	0	0.000319719	0.000239789	0.000239789	0.000479578
OTU_685	685	Acidobacteria	unidentified_Acidobacteria	Subgroup_4	unidentified_Acidobacteria	Blastocatella		0	0	0	0	0	0	0	0	0	0	0	0	0	0	0	0	0	7.99297e-05	0	0	0	0	0	0	0	0	0	0	0	0	0	0	0	0	0	0	0	0	7.99297e-05	0	0	0
OTU_972	972	Proteobacteria	Deltaproteobacteria	Bdellovibrionales	Bdellovibrionaceae	Bdellovibrio		0	0	0	0	0	0	0	0	0	0	0	0	0.000159859	0	0	0	7.99297e-05	0	0	0	0	0	0	0	0	7.99297e-05	0	0	0	0	0	0	0	0	0	0	0	0	0.000239789	0.000319719	0.000159859	7.99297e-05
OTU_2052	2052	Acidobacteria	unidentified_Acidobacteria	Subgroup_6				0	0	0	0	0	0	0	0	0	0	0	0	0	7.99297e-05	0	0	0	0	0	0	0	0	0	0	0	0	0	0	7.99297e-05	0	0	0	0	0	0	0	0	0	7.99297e-05	0	0	0
OTU_470	470	Proteobacteria	Deltaproteobacteria	Myxococcales				0	0	0	0	0	0	0	0	0	0	0	0	0	0	0	0	0	0	0	0	0	0	0	0	7.99297e-05	0	0	0	0	0	0	0.000159859	0	0	0	0	0	7.99297e-05	0.000159859	0.000319719	0.000319719	0.000239789
OTU_573	573	Bacteroidetes	Sphingobacteriia	Sphingobacteriales	PHOS-HE51			0	0	0	0	0	0	0	0	0	0	0	0	0	0	0	0	0	0	0	0	0	0	0	7.99297e-05	0	0	7.99297e-05	0	0	0	0	0	0	0	0	0	0	0	0	7.99297e-05	0.000239789	7.99297e-05
OTU_2740	2740	Proteobacteria	Alphaproteobacteria	Rhodobacterales	Rhodobacteraceae	Tabrizicola		0	0	0	0	0	0	0	0	0	0	0	0	0	0	0	0	0	0	0	0	0	0	0	0	0	0	0	0	0	0	0	7.99297e-05	7.99297e-05	0	0	0	0	0	0	0	0	7.99297e-05
OTU_1976	1976	Proteobacteria						0	0	0	0	0	0	0	0	0	0	0	0	0	0	0	0	0	0	0	0	0	0	0	0	0	0	0	0	0	0	0	0	0	0	0	0	0	0	0	0	0	0
OTU_2262	2262	Bacteroidetes	Sphingobacteriia	Sphingobacteriales	env.OPS_17			0	0	0	0	0	0	0	0	0	0	0	0	0	0	0	0	0	7.99297e-05	0	0	0	0	0	0	7.99297e-05	7.99297e-05	0	0	0	7.99297e-05	0	0	0	0	0	0	0	0	0	0	0	0
OTU_3078	3078	Bacteroidetes	Cytophagia	Cytophagales	Cytophagaceae			0	0	0	0	0	0	0	0	0	0	0	0	0	0	0	0	0	0	0	0	0	0	0	0	0	0	0	0	0	0	0	0	0	0	0	0	0	0	0	0.000159859	0.000159859	0.000159859
OTU_1270	1270	Proteobacteria	Deltaproteobacteria	Myxococcales	BIrii41			0	0	0	0	0	0	0	0	0	0	0	0	0	0	0	0	0	0	0	0	0	0	0	0	0	0	0	0	0	0	0	7.99297e-05	0	0	0	0	0	0	0	0	0	0
OTU_1260	1260	Elusimicrobia	unidentified_Elusimicrobia	Lineage_IIb				0	0	0	0	0	0	0	0	0	0	0	0	0	0	0	0	0	0	0	0	0	0	0	0	0	0	0	0	0	0	0	0	0	0	0	0	0	0	0	0	0	7.99297e-05
OTU_1161	1161	Bacteroidetes	Sphingobacteriia	Sphingobacteriales	Saprospiraceae			0	0	0	0	0	0	0	0	0	0	0	0	0	0	0	0	0	0	0	0	0	0	0	0	0	0	0	0	0	0	0	0	0.000159859	0	0	0	0	0	0	0	0	0
OTU_17	17	Proteobacteria	Gammaproteobacteria	Enterobacteriales	Enterobacteriaceae			0.000879226	7.99297e-05	0.0327712	0.00423627	0	0.0013588	0.00775318	0.000159859	0	0	0.00319719	0.00815283	0.0029574	0.00151866	0.00223803	0.000879226	0.000159859	0.00167852	0.00103909	0.0490768	0.0812885	0.00367676	0.163216	0.199105	0.030693	0.0665015	0.0367676	0.00567501	0.00199824	0.000159859	0.0129486	0.00495564	0.00575494	0.00167852	0.0021581	0.000479578	0.0072736	0.00103909	0.000639437	0.000639437	0.000239789	0
OTU_96	96	Proteobacteria	Alphaproteobacteria	Rhizobiales	Bradyrhizobiaceae	Bosea	Bosea_thiooxidans	0.00887219	0	0.00527536	0.00311726	0.0103909	0.0013588	0.00447606	0.00367676	0.00271761	0.010231	0.0029574	0.0051155	0.00871233	0.00351691	0.00655423	0.00159859	0.000159859	0.00391655	0.000159859	0.00247782	0.000479578	0	0	7.99297e-05	0.00279754	0.000639437	0	0.00111902	0.000719367	0	0.000639437	0.000399648	0.000239789	0.00143873	0.000319719	0	0.000319719	0.00223803	0.000319719	0.000319719	0.000479578	0.000479578
OTU_85	85	Proteobacteria	Alphaproteobacteria	Rhizobiales	Hyphomicrobiaceae	Rhodoplanes		0	0	0	0	0	0	0	0	0.000159859	0	0	0	7.99297e-05	7.99297e-05	0.000559508	0	0	0.000239789	0	7.99297e-05	7.99297e-05	0	0	0.000159859	0	7.99297e-05	0	0.000399648	0	7.99297e-05	0	0	0	0	0	0	0.000159859	0.000159859	0.00559508	0.00543522	0.00535529	0.00463592
OTU_68	68	Proteobacteria	Betaproteobacteria	SC-I-84				0	0	0	0	0	0	0	0	0	0	0	0	0.000319719	7.99297e-05	7.99297e-05	7.99297e-05	7.99297e-05	7.99297e-05	0	0	0	0	0	0	0	7.99297e-05	7.99297e-05	7.99297e-05	7.99297e-05	0	7.99297e-05	0	0	0	0	7.99297e-05	7.99297e-05	0.000159859	0.00679402	0.00351691	0.00311726	0.00839261
OTU_266	266	Gemmatimonadetes	unidentified_Gemmatimonadetes	Gemmatimonadales	Gemmatimonadaceae	Gemmatimonas		0	0	0	0	0	0	0	0	0	0	0	0	7.99297e-05	0	0.000479578	0	0	7.99297e-05	0	0	0	0	0	0	0	7.99297e-05	0	0	0	0	0	0	0	0	0	0	0	0.000159859	0.00479578	0.00735353	0.00367676	0.00439613
OTU_255	255	Proteobacteria	Betaproteobacteria	Nitrosomonadales	Nitrosomonadaceae	Nitrosospira		0	0	0	0	0	0	0	0	0	0	0	0	0.000159859	0	0	7.99297e-05	0	0	7.99297e-05	0	0	0	0	0	0	0	7.99297e-05	0.000159859	0	0	0	0	7.99297e-05	0	0	0	7.99297e-05	7.99297e-05	0.00143873	0.00111902	0.0029574	0.00175845
OTU_114	114	Proteobacteria	Alphaproteobacteria	Rhodobacterales	Rhodobacteraceae	Paracocccus	Paracoccus_marcusii	0	0	0	0	0	0.00191831	0.00607465	7.99297e-05	0	0.00199824	0.00359683	0.000399648	0	0.000239789	0.00207817	0.00351691	0	0.00207817	0.000159859	7.99297e-05	0.000159859	0	0	0	0	0	0.000239789	7.99297e-05	0.000159859	0	0	0	0	0	0	0	7.99297e-05	0	0.000159859	7.99297e-05	0	7.99297e-05
OTU_265	265	Actinobacteria	Acidimicrobiia	Acidimicrobiales	Acidimicrobiaceae			0	0	0	0	0	0	0	0	0	0	0	0	0	0	0	0	0	0	0	0	0	0	0	0	0	0	7.99297e-05	7.99297e-05	7.99297e-05	0.000159859	0	7.99297e-05	0	0	0	0	0	7.99297e-05	0.0013588	0.00159859	0.00159859	0.00111902
OTU_2588	2588	Verrucomicrobia	OPB35_soil_group					0	0	0	0	0	0	0	0	0	0	0	0	7.99297e-05	0	0	7.99297e-05	0	0	0	0	0	0	0	0	0	7.99297e-05	0	0	0	0	0	0	0	0	0	0	7.99297e-05	0	0.00119894	0.00127887	0.000319719	0.000639437
OTU_403	403	Proteobacteria	Alphaproteobacteria	Rhizobiales	Hyphomicrobiaceae	Devosia		0	0	0	0	0	0	0	0	0	0	0	0	0	0	7.99297e-05	0	0	0	0	0	0.0013588	0	0	0	0	0	0	0	0	0	0	0	7.99297e-05	0	0	0	0	0	0.000239789	7.99297e-05	7.99297e-05	0.000239789
OTU_778	778	Bacteroidetes	Cytophagia	Cytophagales	Cytophagaceae	Adhaeribacter		0	0	0	0	0	0	0	0	0.000239789	0	0	0	0	0	0	0	0	0	0	0	0	0	0	0	0	0	7.99297e-05	0	0	0	0	0	0	0	0	0	0.000159859	0	0.000479578	0.000399648	0.000159859	0.000239789
OTU_670	670	Actinobacteria	Acidimicrobiia	Acidimicrobiales				0	0	0	0	0	0	0	0	0	0	0	0	0	0	0	0	0	0	0	0	0	0	0	0	0	0	0	0	0	0	0	0	0	0	0	0	0	7.99297e-05	0.000639437	0.000479578	0.000159859	0.00111902
OTU_385	385	Bacteroidetes	Sphingobacteriia	Sphingobacteriales	AKYH767			0	0	0	0	0	0	0	0	0	0	0	0	0	0	0	0	0	7.99297e-05	0	0.000159859	0	0	0	0	0	0	0	0	0	0	0	0	0	0	0	0	7.99297e-05	0.000399648	0.000159859	0.000399648	0.000159859	0.000879226
OTU_359	359	Acidobacteria	unidentified_Acidobacteria	Subgroup_6				0	0	0	0	0	0	0	0	0	0	0	0	0	0	0	0	0	0	0	0	0	0	0	0	0	0.000159859	7.99297e-05	0	0	0	0	0	0.000159859	0	0	0	0	0	7.99297e-05	7.99297e-05	7.99297e-05	7.99297e-05
OTU_3482	3482	Proteobacteria	Betaproteobacteria	SC-I-84				0	0	0	0	0	0	0	0	0	0	0	0	0	0	7.99297e-05	0	0	0	0	0	0	0	0	0	0	0	0	0	0	0	0	0	0	0	0	0	0	0	0.000319719	0.000399648	0.000559508	0.000799297
OTU_592	592	Armatimonadetes	Armatimonadia	Armatimonadales				0	0	0	0	0	0	0	0	0	0	0	0	7.99297e-05	0	0	0	0	0	0	0	0	0	0	0	0	0	0	0	0	0	0	0	7.99297e-05	0	0	0	0	0	0.000959156	0.000239789	0.000159859	0.000479578
OTU_936	936	Acidobacteria	unidentified_Acidobacteria	Subgroup_6				0	0	0	0	0	0	0	0	0	0	0	0	0	0	0	0	0	0	0	0	0	0	0	0	0	0	0	0	0	0	0	0	0	0	0	0	0	0	0.000239789	0.000159859	7.99297e-05	0
OTU_1905	1905	Bacteroidetes	Flavobacteriia	Flavobacteriales	Flavobacteriaceae	Flavobacterium		0	0	0	0	0	0	0	0	0	0	0	0	0	0	0	0	0	7.99297e-05	0	0	0	0	7.99297e-05	0	0	0	0	0	0	0	7.99297e-05	0.00151866	0	0	0.000319719	0	0	0	0	0	0	0
OTU_3966	3966	Fibrobacteres	Fibrobacteria	Fibrobacterales	Fibrobacteraceae	possible_genus_04		0	0	0	0	0	0	0	0	0	0	0	0	0	0	0	0	0	7.99297e-05	0	0	0	7.99297e-05	0	0	0	0	0	0	0	0	0	0	0	0	0	0	7.99297e-05	0	0.000399648	0.000319719	7.99297e-05	0.000319719
OTU_647	647	Bacteroidetes	Sphingobacteriia	Sphingobacteriales	NS11-12_marine_group			0	0	0	0	0	0	0	0	0	0	0	0	0	0	0	0	0	0	7.99297e-05	0	0	0	0	0	0	7.99297e-05	0	7.99297e-05	0	0	7.99297e-05	0	7.99297e-05	0	0	0	0	0	7.99297e-05	0.000239789	0.000639437	7.99297e-05
OTU_1488	1488	Proteobacteria	Deltaproteobacteria	Oligoflexales	unidentified_Oligoflexales	unidentified_Oligoflexales	Geobacter_sp._enrichment_culture_clone_VanCtr1	0	0	0	0	0	0	0	0	0	0	0	0	7.99297e-05	0	0	0	0	0	0	0	0.000239789	0	0	0	0	0	0	0	0	0	0	0	0	0	0	0	0	0	0.000559508	0.000239789	0	0.000239789
OTU_383	383	Bacteroidetes	Sphingobacteriia	Sphingobacteriales	Saprospiraceae			0	0	0	0	0	0	0	0	0	0	0	7.99297e-05	0	0	7.99297e-05	0	0	0	7.99297e-05	0	0	0	0	0	0	0	0	0	0	0	0	0	0	0	0	0	0	0	0	0	7.99297e-05	7.99297e-05
OTU_860	860	Acidobacteria	unidentified_Acidobacteria	Subgroup_4	unidentified_Acidobacteria	Blastocatella		0	0	0	0	0	0	0	0	0	0	0	0	0	0	0	0	0	0	0	0	0	0	0	7.99297e-05	0	0	0	7.99297e-05	0	0	0	0	0	0	0	0	0	0	0	0	0	0
OTU_3339	3339	Proteobacteria	Alphaproteobacteria	Rhizobiales	Hyphomicrobiaceae	Devosia		0	0	0	0	0	0	0	0	0.000239789	0	0	0.000159859	0	0	0	0	0	0	0	0	0.000239789	0	0	0	0	0	0	0	0	0	0	0.000319719	0	0	0	0	0	0	7.99297e-05	7.99297e-05	0	7.99297e-05
OTU_1054	1054	Bacteroidetes	Sphingobacteriia	Sphingobacteriales	PHOS-HE51			0	0	0	0	0	0	0	0	0	0	0	0	0	0	0	0	0	0	0	0	0	0	0	0	0	0	7.99297e-05	0	0	0	0	0	0	0	0	0	0	0	0.000159859	0.000159859	0.000319719	0.000239789
OTU_769	769	Gemmatimonadetes	unidentified_Gemmatimonadetes	AT425-EubC11_terrestrial_group				0	0	0	0	0	0	0	0	0	0	0	0	0	0	0	0	0	0	0	0	0	0	0	7.99297e-05	0	0	0	0	0	0	0	0	0	0	0	0	0	0	0	0	0.000159859	0
OTU_500	500	Proteobacteria	Deltaproteobacteria	Myxococcales	mle1-27	unidentified_mle1-27	Myxococcales_bacterium_Gsoil_473	0	0	0	0	0	0	0	0	0	0	0	0	0	0	0	0	0	0	0	0	0	0	0	0	0	0	0	0	0	0	0	0	0.000319719	0	0	0	0	0	0.000159859	7.99297e-05	0.000159859	7.99297e-05
OTU_597	597	Proteobacteria	Deltaproteobacteria	Bdellovibrionales	Bdellovibrionaceae	Bdellovibrio		0	0	0	0	0	0	0	0	0	0	0	0	0	0	0	0	0	0	0	0	0	0	0	0	0	0	0	0	0	0	0	0	0	0	0	0	0	0	0.000159859	0.000159859	0	0.000239789
OTU_1658	1658	Acidobacteria	unidentified_Acidobacteria	Subgroup_6				0	0	0	0	0	0	0	0	0	0	0	0	0	0	0	0	0	0	0	0	0	0	0	0	0	0	0	0	0	7.99297e-05	0	0	0	0	0	0	0	0	0	7.99297e-05	0	0
OTU_1155	1155	Proteobacteria	Deltaproteobacteria	Bdellovibrionales	Bdellovibrionaceae	Bdellovibrio		0	0	0	0	0	0	0	0	0	0	0	0	0	0	0	7.99297e-05	0	0	0	0	0	0	0	0	0	0	0	7.99297e-05	0	0	0	0	0	0	0	0	0	7.99297e-05	0.000159859	0.000159859	0	7.99297e-05
OTU_1290	1290	Verrucomicrobia	Spartobacteria	Chthoniobacterales	Chthoniobacteraceae	Chthoniobacter		0	0	0	0	0	0	0	0	0	0	0	0	0	0	0	0	0	0	0	0	0	0	0	0	0	0	0	0	0	0	0	0	0	0	0	0	0	0	0	0	0	7.99297e-05
OTU_628	628	Proteobacteria	Deltaproteobacteria	Myxococcales	Haliangiaceae	Haliangium		0	0	0	0	0	0	0	0	0	0	0	0	0	0	0	0	0	0	0	0	0	0	0	0	0	0	7.99297e-05	0	0	0	0	0	0	0	0	0	0	0	7.99297e-05	0	0	0
OTU_2297	2297	Proteobacteria	Deltaproteobacteria	GR-WP33-30				0	0	0	0	0	0	0	0	0	0	0	0	0	0	0	0	0	0	0	0	0	0	0	0	0	0	0	0	0	0	0	0	0	0	0	0	0	0	0	0	7.99297e-05	7.99297e-05
OTU_705	705	Planctomycetes	Phycisphaerae	Phycisphaerales	Phycisphaeraceae	SM1A02		0	0	0	0	0	0	0	0	0	0	0	0	0	0	0	0	0	0	0	0	0	0	0	0	0	0	0	0	0	0	0	0	0	0	0	0	0	0	7.99297e-05	0	0.000159859	0
OTU_1051	1051	Armatimonadetes						0	0	0	0	0	0	0	0	0	0	0	0	0	0	0	0	0	0	0	0	0	0	0	0	0	0	7.99297e-05	7.99297e-05	0	0	0	0	0	0	0	0	0	0	7.99297e-05	7.99297e-05	0	0
OTU_1958	1958	Bacteroidetes	Flavobacteriia	Flavobacteriales	Cryomorphaceae	Crocinitomix		0	0	0	0	0	0	0	0	0	0	0	0	0	0	0	0	0	0	0	0	0	0	0	0	0	7.99297e-05	0	0	0	0	0	0	0	0	0	0	0	0	7.99297e-05	0	0	0
OTU_968	968	Bacteroidetes	Sphingobacteriia	Sphingobacteriales	Saprospiraceae			0	0	0	0	0	0	0	0	0	0	0	0	0	0	7.99297e-05	0	0	0	0	0	0	0	0	0	0	0	0	7.99297e-05	0	0	0	0	0	0	0	0	0	0	0	0	0	0
OTU_1240	1240	Bacteroidetes	Sphingobacteriia	Sphingobacteriales	Saprospiraceae			0	0	0	0	0	0	0	0	0	0	0	0	0	0	0	0	0	0	0	0	0	0	0	0	7.99297e-05	0.000399648	0	0	0	0	0	0	0	0	0	0	0	0	0	0	0	0
OTU_1138	1138	Gemmatimonadetes	unidentified_Gemmatimonadetes	Gemmatimonadales	Gemmatimonadaceae	Gemmatimonas		0	0	0	0	0	0	0	0	0	0	0	0	0	0	0	0	0	0	0	0	0	0	0	0	0	0	0	0	0	0	0	0	0	0	0	0	0	0	7.99297e-05	7.99297e-05	0	0
OTU_1390	1390	Proteobacteria	Deltaproteobacteria	Desulfuromonadales	M20-Pitesti			0	0	0	0	0	0	0	0	0	0	0	0	0	0	0	0	0	0	0	0	0	0	0	0	0	0	0	0	0	0	0	0	0	0	0	0	0	0	0	0	0	0
OTU_2153	2153	Proteobacteria	Betaproteobacteria					0	0	0	0	0	0	0	0	0	0	0	0	0	0	0	0	0	0	0	0	0	0	0	0	0	0	0	0	0	0	0	0	0	0	0	0	0	0	0	0	0	0
OTU_4063	4063	Proteobacteria	Gammaproteobacteria	Pseudomonadales	Pseudomonadaceae	Pseudomonas		0.00391655	0.0149468	0	0.000479578	0.00759332	0.0159859	0.030693	0.00335705	0	0	0.0013588	0.000799297	0.000879226	0.0382064	0.000799297	0.000159859	0.000159859	0.000479578	0.00327712	0.0147071	0.0191032	0.00159859	0.135241	0.0958357	0.0211014	0.039725	0.0254976	0.00367676	0.00223803	0.000319719	0.00487571	0.00527536	0.00223803	0.00271761	0.000879226	0.000319719	0.00111902	0.00119894	7.99297e-05	0.000479578	0.000639437	0
OTU_19	19	Proteobacteria	Gammaproteobacteria	Xanthomonadales	Xanthomonadaceae	Stenotrophomonas		0.0029574	0.00631444	0.00159859	0	0.00671409	0.000319719	0.00815283	0.0029574	0	0.00383662	0.0021581	0.00191831	0.00223803	0.00415634	0.00207817	0.00183838	0.000719367	0.00327712	0.000559508	0.0521941	0.0824874	0.0111102	0.0365279	0.0282152	0.00951163	0.0230197	0.0168652	0.00607465	0.00231796	0.000879226	0.0343698	0.00839261	0.00415634	0.00159859	0.00263768	0.00151866	0.0103909	0.0117497	0.000479578	0.000559508	0.000319719	0.000479578
OTU_38	38	Actinobacteria	unidentified_Actinobacteria	Micrococcales	Micrococcaceae	Kocuria	Kocuria_rosea	0.0137479	0.000159859	0.0423627	0.00887219	0.000639437	0	0.00119894	0.121093	0.00159859	7.99297e-05	0.000799297	7.99297e-05	0.000159859	0	0	0.00207817	0.000159859	0	0.000399648	0	0	0	0.000159859	7.99297e-05	0	0.00247782	0	0	7.99297e-05	0	0	0.000319719	7.99297e-05	0.000159859	0	0	0.000159859	0	0.000159859	0	0	0
OTU_1514	1514	Proteobacteria	Betaproteobacteria	Burkholderiales	Oxalobacteraceae			0	0	7.99297e-05	0.00839261	0	0.0405243	0.000159859	0.00143873	0.00671409	0.000239789	0.0126289	0.0103109	0.00159859	7.99297e-05	0.00263768	0.00839261	7.99297e-05	0.00151866	0.000319719	0.00439613	0.00351691	0.00375669	0.000159859	0.00127887	0.00327712	0.000559508	0.000799297	0.00423627	0.00119894	0.0013588	0.000719367	0.000639437	0.00199824	0.00151866	0.00391655	0.0185437	0.00103909	0.00335705	0.000559508	0.000559508	7.99297e-05	0.000399648
OTU_65	65	Proteobacteria	Alphaproteobacteria	Rhizobiales	Methylobacteriaceae	Methylobacterium	Methylobacterium_adhaesivum	0	0	0	0	0	7.99297e-05	7.99297e-05	0	0.0388458	0.00191831	0	0.00655423	0.00415634	0	0.00127887	0.000879226	0	0.00199824	7.99297e-05	0.000399648	0.000479578	0	0	0	0.000559508	0	0	7.99297e-05	0	7.99297e-05	0	0.000239789	0	0	0	0	0	7.99297e-05	0.00191831	0.00207817	0.000799297	0.000879226
OTU_653	653	Proteobacteria	Betaproteobacteria	Burkholderiales	Oxalobacteraceae			0	0	0	0	0	0.00375669	0	0	0	0	7.99297e-05	0.000719367	0.00103909	0	0.00351691	0.00167852	0	0.000159859	0	0	0.00103909	0.0123092	0.000239789	0.00255775	0.0021581	7.99297e-05	0.000719367	0.0116697	0.000639437	0	0.000159859	0.00255775	7.99297e-05	7.99297e-05	0.00575494	0.000159859	0.000399648	0.00151866	0.000399648	0.000479578	0.000479578	0.000319719
OTU_1396	1396	Actinobacteria	unidentified_Actinobacteria	Corynebacteriales	Mycobacteriaceae	Mycobacterium		0	0	0.000159859	7.99297e-05	0	0	0	0.00111902	0.0021581	0.00623451	0.00239789	0.00343698	0.00567501	0.000479578	0.00967149	0.00551515	0	0.0021581	0.000399648	0	0.000479578	0	0	0	0.000399648	0	7.99297e-05	0.000159859	7.99297e-05	0	7.99297e-05	7.99297e-05	0	7.99297e-05	0	0	0	0	0.000959156	0.00167852	0.000559508	0.000879226
OTU_3630	3630	Proteobacteria	Alphaproteobacteria	Rhizobiales	Methylobacteriaceae	Microvirga		0	0	0	0	0	0	0.0051155	0	0	0	0	0.0307729	7.99297e-05	0	0.000159859	0	0	0	0	0	0	0	0	0	0	0	0	0	0	0	0	0	7.99297e-05	0	0	0	0	0.000159859	0.00143873	0.00239789	0.000799297	0.000879226
OTU_202	202	Proteobacteria	Alphaproteobacteria	Rhizobiales	Bradyrhizobiaceae			0	0	0	0	0	0	0.000479578	0.00223803	0	0	0.0021581	0.000239789	7.99297e-05	0	0.000159859	0.000559508	0	0	0	7.99297e-05	0.000559508	0	7.99297e-05	0.000159859	0	7.99297e-05	0.00127887	0.000399648	0.000879226	0	0.000159859	0	0	0.000399648	7.99297e-05	0	7.99297e-05	0.000159859	0.00151866	0.00183838	0.000799297	0.00191831
OTU_120	120	Proteobacteria	Alphaproteobacteria	Rhodospirillales	Rhodospirillaceae			0	0	0	0	0	0	0	0	0	0	0	0.000239789	0.000159859	7.99297e-05	0.000159859	0	0.00311726	7.99297e-05	0	0	0	0	0	0	0	0	7.99297e-05	0	0.000159859	0	0	0	0	0	0	0	0.000319719	0.000159859	0.00383662	0.00367676	0.00439613	0.00335705
OTU_2525	2525	Proteobacteria	Betaproteobacteria	Nitrosomonadales	Nitrosomonadaceae			0	0	0	0	0	0	0	0	0	0	0	0	0	0	0	7.99297e-05	0	7.99297e-05	0	0	0	0	0	0	0	0.000159859	0	0	0	0	0	0	7.99297e-05	0	0	0	7.99297e-05	0	0.00335705	0.00223803	0.00423627	0.00255775
OTU_1868	1868	Proteobacteria	Betaproteobacteria	Burkholderiales	Comamonadaceae	Comamonas	Comamonas_denitrificans	0	0	0	0	0	0	0.00239789	0	0	0	0	0.000959156	0	0	0	0.000239789	0	0.00359683	0.000319719	7.99297e-05	0.000559508	7.99297e-05	7.99297e-05	0	7.99297e-05	7.99297e-05	0.000239789	7.99297e-05	0.000159859	0	0.000959156	7.99297e-05	0.000639437	0	0.000319719	0.0126289	0.000719367	0	0	0.000879226	0	7.99297e-05
OTU_119	119	Proteobacteria	Alphaproteobacteria	Rhizobiales	Phyllobacteriaceae			0	0	0	0	0	0	0	0	0	0	0.0029574	0.00623451	0	0.000959156	0.00359683	0	0	0.00439613	0.00223803	7.99297e-05	0.000159859	7.99297e-05	7.99297e-05	0	0.000159859	0	0	7.99297e-05	0	0	0.000239789	0	7.99297e-05	0	0	0	7.99297e-05	7.99297e-05	0.000559508	0.000239789	0.000319719	0.000159859
OTU_226	226	Actinobacteria	unidentified_Actinobacteria	Propionibacteriales	Propionibacteriaceae	Microlunatus		0	0	0	0	0	0	0	7.99297e-05	0.000719367	0	0	0.000159859	7.99297e-05	0	0.000159859	7.99297e-05	0	0	7.99297e-05	0	0	0	0	0	7.99297e-05	0	7.99297e-05	7.99297e-05	0	0	0	7.99297e-05	0	0	0	0	0	7.99297e-05	0.00151866	0.00223803	0.00199824	0.00167852
OTU_128	128	Actinobacteria	unidentified_Actinobacteria	Frankiales	Sporichthyaceae			0	0	0	0	0	0	0	0	0	0.00367676	0	0	7.99297e-05	7.99297e-05	7.99297e-05	0	0	0	0	0	0	0	0	0	0	7.99297e-05	0	0	0	0	0	0	0.000559508	0	0	0	7.99297e-05	0	0.00191831	0.0013588	0.00103909	0.000959156
OTU_620	620	Proteobacteria	Alphaproteobacteria	Sphingomonadales	Ellin6055			0	0	0	0	0	0	0	0	0	0	0	0	0.000319719	7.99297e-05	0	0	7.99297e-05	0	0	0	0	0	0	0	0	0	7.99297e-05	0	7.99297e-05	0	0	0	7.99297e-05	0	0	0	0	7.99297e-05	0.00191831	0.00175845	0.00143873	0.00151866
OTU_2642	2642	Proteobacteria	Alphaproteobacteria	Sphingomonadales	Sphingomonadaceae	Sphingomonas		0	0	0	0	0	0	7.99297e-05	7.99297e-05	0.00111902	0	0	0.000319719	7.99297e-05	0	0.00391655	0.00103909	0	0	0	0	0	0	0.000239789	7.99297e-05	7.99297e-05	0	0	0.000319719	0.000239789	0	0	7.99297e-05	0	0	0	0	0	0	0.000799297	0.000559508	0.000159859	0.000719367
OTU_357	357	Proteobacteria	Deltaproteobacteria	Myxococcales	Polyangiaceae			0	0	0	0	0	0	0	0	0	0	7.99297e-05	0	7.99297e-05	0	0	0	0	7.99297e-05	0	0	0	0	0	0	0	7.99297e-05	0	0	0	0	0	0	0	0	0	0	0.000159859	0	0.00255775	0.00199824	0.0013588	0.00159859
OTU_338	338	Actinobacteria	unidentified_Actinobacteria	Frankiales	Nakamurellaceae	Nakamurella		0	0	0	0	0	0	0	0	0	0	0	0	0.00167852	0	0	0	0	7.99297e-05	0	0	0	0	0	0	0.000239789	7.99297e-05	0	7.99297e-05	7.99297e-05	0	0	0	0	0	0	0	0	0.000159859	0.00151866	0.000799297	0.000319719	0.000559508
OTU_3576	3576	Proteobacteria	Deltaproteobacteria	Bdellovibrionales	Bacteriovoracaceae	Peredibacter		0	0	0	0	0	0	0.00767325	0	0.00191831	0	0	0.000239789	0.000159859	7.99297e-05	7.99297e-05	7.99297e-05	0	0	0	0	0.000239789	0	0	0	0.000159859	0.000159859	0	0	7.99297e-05	0.000639437	0.000239789	7.99297e-05	0.000479578	0.000559508	0	0	0	7.99297e-05	0.000639437	0.000639437	0.000239789	0.000319719
OTU_350	350	Proteobacteria	Gammaproteobacteria	Xanthomonadales				0	0	0	0	0	0	0	0	0	0	0	0	0	0	7.99297e-05	0	0	0	0	0	0	0	0	0	7.99297e-05	0.000399648	0	0	0	0	0	0	0	0	0	0	0.000319719	0	0.000719367	0.00111902	0.00303733	0.000719367
OTU_868	868	Proteobacteria	Alphaproteobacteria	Sphingomonadales				0	0	0	0	0	0	0	0	0	0	0.00127887	0.000159859	0.000159859	0	0	0.000399648	0	0.00111902	0	7.99297e-05	0	0	0	0	0.000319719	0	0	0	0	0	0	0	0	0	7.99297e-05	0	0	0	0.000479578	0.000239789	0.000319719	0.000639437
OTU_598	598	Actinobacteria	unidentified_Actinobacteria	Propionibacteriales	Nocardioidaceae	Nocardioides		0	0	0	0	0	0.000399648	0	0	0	0	0.00103909	0	0.000799297	0	0	0	0	0	7.99297e-05	0	0.000239789	0	0	7.99297e-05	7.99297e-05	0	0	0.000159859	7.99297e-05	0	0	0	0	7.99297e-05	0.000239789	0	0	0	0.000479578	0.000559508	0.000799297	0.000239789
OTU_700	700	Proteobacteria	Alphaproteobacteria	Rhizobiales	Hyphomicrobiaceae	Devosia		0	0	0	0	0	0	0	0	0	0	0	0	0	0	0	0	0	0	0	0	0	0	0	0.000159859	0.000159859	0	0	0	0	0	0	0	0	0	7.99297e-05	0	7.99297e-05	0	0.000399648	0.000319719	0.000319719	0.000559508
OTU_961	961	Proteobacteria	Gammaproteobacteria	Cellvibrionales	Halieaceae	Haliea		0	0	0	0	0	0	0	0	0	0	0	7.99297e-05	0	0	0	0	0	7.99297e-05	0	0	0	0	0	0	7.99297e-05	0	0	0	0	0	0	0	0	0	0	0	0	7.99297e-05	0.000479578	0.000239789	0.00255775	0.000399648
OTU_1825	1825	Bacteroidetes	Cytophagia	Cytophagales	Cytophagaceae	Adhaeribacter		0	0	0	0	0	0	0	0	0	0	0	0	0	0	0.000159859	0	0	7.99297e-05	0	0	0	0	0	0	0	7.99297e-05	0	7.99297e-05	0	0	0	0	0	0	0	0	0	7.99297e-05	0.000399648	0.000399648	0.000639437	0.000559508
OTU_4157	4157	Actinobacteria	unidentified_Actinobacteria	Micrococcales	Microbacteriaceae			0	0	0	0	0	0	0	0	0	0	0	0.000399648	0.000159859	0	0	0	0	0.00175845	0	0	0.000319719	0	0	0.000159859	0.000559508	7.99297e-05	0	0.000399648	0.000239789	7.99297e-05	0.000639437	0.000159859	7.99297e-05	0.000239789	0	0	7.99297e-05	7.99297e-05	0.000399648	0.000239789	0.000399648	7.99297e-05
OTU_595	595	Actinobacteria	Acidimicrobiia	Acidimicrobiales	Iamiaceae	Iamia		0	0	0	0	0	0	0	0	0	0	0	7.99297e-05	7.99297e-05	0	0	7.99297e-05	0	0.000159859	0	0	0	0	0	7.99297e-05	7.99297e-05	7.99297e-05	0	7.99297e-05	7.99297e-05	0	0	7.99297e-05	0.000159859	0	0	0	0	7.99297e-05	0.000479578	0.000239789	0.000399648	0.000399648
OTU_523	523	Bacteroidetes	Flavobacteriia	Flavobacteriales	NS9_marine_group			0	0	0	0	0	0	0	0	0	0	7.99297e-05	0.000159859	7.99297e-05	0	0	7.99297e-05	0	0	0	7.99297e-05	0	0	0	7.99297e-05	0	7.99297e-05	0.000159859	0	0	0	0	0	0	0	7.99297e-05	0	7.99297e-05	7.99297e-05	0.000799297	0.000399648	0.000319719	0.000239789
OTU_1399	1399	Proteobacteria	Alphaproteobacteria	Rhizobiales				0	0	0	0	0	0	0	0	0	0	0	0	7.99297e-05	0	0	0	0	0	0	0	0	0	0	0	0	0	0	0	0	0	0	0	0	0	0	0	0	0	0.000559508	0.00151866	0.000479578	0.000479578
OTU_1521	1521	Acidobacteria	Holophagae	Subgroup_10	ABS-19			0	0	0	0	0	0	0	0	0	0	0.000159859	0	0	0	0	0.000159859	0	0	0	0	7.99297e-05	0	0	0	0	0	0	0	0	0	0	0	7.99297e-05	0	0	0	0	0	0.000159859	0.000159859	0.000319719	0.000799297
OTU_445	445	Proteobacteria	Betaproteobacteria	Burkholderiales	Comamonadaceae			0	0	0	0	0	0	0	0	0.00111902	0	0	0.000239789	0	0	0	7.99297e-05	0	0	0	7.99297e-05	0	7.99297e-05	0	0	0	7.99297e-05	7.99297e-05	0.000159859	0.000639437	0	0	0	0.000159859	0	0.000159859	0	0.000239789	0	0.000719367	0.000319719	7.99297e-05	0.000239789
OTU_3302	3302	Planctomycetes	vadinHA49					0	0	0	0	0	0	0	0	0	0	0	0	0	0	7.99297e-05	7.99297e-05	0	0	7.99297e-05	0.000159859	0	0	0	0.000159859	0	7.99297e-05	0	0.000239789	0	0	0	0	0.000159859	0	0	0	0.000159859	7.99297e-05	0.000479578	0.000559508	0.000399648	0.000479578
OTU_425	425	Proteobacteria	Deltaproteobacteria	Myxococcales	Nannocystaceae	Nannocystis		0	0	0	0	0	0	0	0	0	0	0	0	0	0	0	0	0	0	0	0	0	0	0	7.99297e-05	0	0	0	0	0	0	0	0	0	0.000159859	7.99297e-05	0	0	7.99297e-05	7.99297e-05	7.99297e-05	7.99297e-05	0.000479578
OTU_288	288	Proteobacteria	Alphaproteobacteria	Sphingomonadales	Sphingomonadaceae			0	0	0	0	0	0	0	0	0	0	0	0	7.99297e-05	0	0	0	0	7.99297e-05	0	0	0.000159859	7.99297e-05	0	0	0	0	0	0	0.000159859	0	0	0	0	0.000159859	0.000159859	0	0	0	0.000239789	0.000239789	0.000239789	0.00143873
OTU_287	287	Bacteroidetes	Sphingobacteriia	Sphingobacteriales	NS11-12_marine_group			0	0	0	0	0	0	0	0	0	0	0	7.99297e-05	7.99297e-05	0	7.99297e-05	0	0	0	0	7.99297e-05	0	0	0	7.99297e-05	0	7.99297e-05	0	7.99297e-05	0	0	0	0.000159859	0	7.99297e-05	0	0	0.000159859	0	0.000239789	0.000559508	0.000879226	0.000479578
OTU_298	298	Armatimonadetes						0	0	0	0	0	0	0	0	0	0	0	0	0	0.000239789	7.99297e-05	0	0	0	0	0	0	0	0	0	7.99297e-05	0	0.000159859	0	0	0	0	0	0	0	0	0	0	0	0	0.000239789	0.000159859	7.99297e-05
OTU_242	242	Proteobacteria	Deltaproteobacteria	Bdellovibrionales				0	0	0	0	0	0	0	0	0	0	0	0	0	0	0	0	0	0	0	0	0	0	0	0	0.000239789	0	7.99297e-05	7.99297e-05	0	0	0	0	7.99297e-05	7.99297e-05	0	0	0.000159859	0.00279754	7.99297e-05	0.000479578	0.000239789	0.000159859
OTU_2333	2333	Proteobacteria	Betaproteobacteria	SC-I-84	unidentified_SC-I-84	unidentified_SC-I-84	beta_proteobacterium_LWH83	0	0	0	0	0	0	0	0	0	0	0	0	0.000879226	0	0	0	0	0	0	0	0	0	0	0	0	0	0	0	0	0	0	0	0	7.99297e-05	0	0	0	0	0	0	0.000159859	7.99297e-05
OTU_627	627	Actinobacteria	Acidimicrobiia	Acidimicrobiales	Acidimicrobiaceae	CL500-29_marine_group		0	0	0	0	0	0	0	0	7.99297e-05	0	0	7.99297e-05	0	0	7.99297e-05	0	0	0	0	0	7.99297e-05	0	0	0	0.000159859	0	0	0	0	0	7.99297e-05	0	0	0	0	0	0	0	7.99297e-05	0.000239789	0.000239789	0.000319719
OTU_2864	2864	Proteobacteria	Alphaproteobacteria	Rhizobiales	Hyphomicrobiaceae	Devosia		0	0	0	0	0	0	0	0	0.000239789	0	0	7.99297e-05	0	0	0	0	0	7.99297e-05	0	0	7.99297e-05	0	7.99297e-05	0	0.000959156	0.000159859	0	0.000159859	0	0.000239789	0	0.000479578	0	0	0	0	0	0	7.99297e-05	0	0.000159859	0.000159859
OTU_3742	3742	Proteobacteria	Deltaproteobacteria	Myxococcales				0	0	0	0	0	0	0	0	0	0	0	0	0	0	0	0	0	7.99297e-05	0	0	0	0	0	0	0	0	0	0	0	0	7.99297e-05	0	7.99297e-05	0	0	0	0	0	0.000559508	0.000479578	0.000399648	0.000319719
OTU_744	744	Proteobacteria	Betaproteobacteria	Burkholderiales	Burkholderiaceae	Lautropia		0	0	0	0	0	0	0	0	0	0	0	7.99297e-05	0	0	0	0	0	0	0	0	0	0	0	0	0	0	0	0	0	0	0	0	0	0	0	0	7.99297e-05	0	0.000639437	0.000159859	0.000159859	0.000559508
OTU_771	771	Verrucomicrobia	OPB35_soil_group					0	0	0	0	0	0	0	0	0	0	0	0	0	0	0	0	0	0	0	0	0	7.99297e-05	0	0	0	0	0.000159859	0	0	0	0	0	0	0	0	0	0	0	0.000639437	0.000559508	0.000319719	0.000239789
OTU_372	372	Proteobacteria	Betaproteobacteria	Burkholderiales				0	0	0	0	0	0	0	0	0	0	0	0	0	0	7.99297e-05	0	0	0	0	0	0	0	0	0	0	0	0	0	0	0	0	0	0	0	0	0	0	0	0	7.99297e-05	7.99297e-05	0
OTU_801	801	Gemmatimonadetes	unidentified_Gemmatimonadetes	Gemmatimonadales	Gemmatimonadaceae			0	0	0	0	0	0	0	0	0	0	0	0	0	0	0	0	0	0	0	0	0	0	0	0	0	0	0	0	0	0	0	0	0	0	0	0	0	0	0.000239789	0.000239789	7.99297e-05	0.000319719
OTU_339	339	Gemmatimonadetes	unidentified_Gemmatimonadetes	AT425-EubC11_terrestrial_group				0	0	0	0	0	0	0	0	0	0	0	0	0	0	0	0	0	0	0	0	0	0	0	0	0	0	0	0	0	0	0	0	7.99297e-05	0	0	0	0	0	7.99297e-05	7.99297e-05	7.99297e-05	0
OTU_1113	1113	Proteobacteria	Alphaproteobacteria	Rhizobiales	Hyphomicrobiaceae	Pedomicrobium		0	0	0	0	0	0	0	0	0	0	0	0.000319719	0	0	0.000399648	0	0	0	0	0	0	0	0	7.99297e-05	7.99297e-05	0	0	0	0	0	0	0	0	0	0	0	0	0	0.000159859	0.000159859	0.000159859	0.000159859
OTU_3922	3922	Chlorobi	Chlorobia	Chlorobiales	OPB56			0	0	0	0	0	0	0	0	0	0	0	0	0	0	0	0	0	0	0	0	0	0	0	0	0	0	0	0	0	0	0	0	0	0	0	0	0	7.99297e-05	0.000239789	0.000319719	0.000159859	0.000159859
OTU_406	406	Proteobacteria	Deltaproteobacteria	Myxococcales	BIrii41			0	0	0	0	0	0	0	0	0	0	0	0	0	0	0	0	0	0	0	0	0	0	0	0	0	0	0	0	0	0	0	7.99297e-05	0	0	0	0	0	0	0	7.99297e-05	0.000639437	0
OTU_382	382	Bacteroidetes	Cytophagia	Cytophagales	Cytophagaceae			0	0	0	0	0	0	0	0	0	0	0	0	0	0	0	0	0	0	0	0	0	0	0	0	0	0	0	0	0	0	7.99297e-05	0	0	0	0	0	0	0.000719367	0.000239789	0.000159859	0.000399648	0.000159859
OTU_569	569	Proteobacteria	Deltaproteobacteria	Myxococcales	Sandaracinaceae			0	0	0	0	0	0	0	0	0	0	0	0	0	0	0	0	0	0	0	0	0	0	0	0	0	0	0	0	0	0	0	0	0	0	0	0	0	0	0	0.000399648	0.000399648	0
OTU_1371	1371	Proteobacteria	Alphaproteobacteria	Rhizobiales	Hyphomicrobiaceae	Devosia		0	0	0	0	0	0	0	0	0	0	0	7.99297e-05	0	0	0	0.000559508	0	0	0	0	7.99297e-05	0	0	0	0	0	0	0	0	7.99297e-05	0	0	0	0	0	0	0	0	0	7.99297e-05	0	0
OTU_514	514	Gemmatimonadetes	unidentified_Gemmatimonadetes	Gemmatimonadales	Gemmatimonadaceae	Gemmatimonas		0	0	0	0	0	0	0	0	0	0	0	0	0	0	0	0	0	0	0	0	0	0	0	0	0	0	0	0	0	0	0	0	0	0	0	0	0	0	7.99297e-05	0	0	0
OTU_1365	1365	Proteobacteria	Deltaproteobacteria	Myxococcales	Haliangiaceae	Haliangium		0	0	0	0	0	0	0	0	0	0	0	0	0	0	0	0	0	0	0	0	0	0	0	0	0	0	0	7.99297e-05	0	0	0	0	0	0	0	0	0	0	7.99297e-05	0	0	0.000239789
OTU_816	816	Acidobacteria	unidentified_Acidobacteria	Subgroup_4	unidentified_Acidobacteria	Blastocatella		0	0	0	0	0	0	0	0	0	0	0	0	0	0	0	0	0	0	0	0	0	0	0	0	0	0	0	0	0	0	0	0	0	0	0	0	0	0	0	0	0	0
OTU_486	486	Actinobacteria	unidentified_Actinobacteria	Micrococcales	Intrasporangiaceae			0	0	0	0	0	0	0	0	0	0	0	7.99297e-05	0	0	0	0	0	0	0	0	0	0	0	0	0	0	0	0	0	0	0	0	0	0	0	0	0	0	0	7.99297e-05	0	7.99297e-05
OTU_659	659	Proteobacteria	Alphaproteobacteria	Rhizobiales	Rhizobiaceae	Rhizobium		0	0	0	0	0	0	0	0	0	0	0	0	0	0	0	0	0	7.99297e-05	0	0	0	0.000239789	0	0	0.000639437	0	0	0	0	0	0.00119894	0	0.000159859	0	0.000239789	0	0	0	0	0.000159859	0	0
OTU_1398	1398	Proteobacteria	Deltaproteobacteria	Myxococcales	BIrii41			0	0	0	0	0	0	0	0	0	0	0	0	0	7.99297e-05	0	0	0	0	0	0	0	0	0	0	7.99297e-05	0	0	0	0	0	0	0	0	0	0	0	0	0	7.99297e-05	0.000479578	0.000639437	7.99297e-05
OTU_1375	1375	Acidobacteria	unidentified_Acidobacteria	Subgroup_3	unidentified_Acidobacteria	Bryobacter		0	0	0	0	0	0	0	0	0	0	0	0	0	7.99297e-05	7.99297e-05	0	0	0	0	0	0	0	0	0	0	0	0	0	0	0	0	0	0	0	0	0	0	0	0.000399648	0.000319719	0.000399648	0
OTU_518	518	Proteobacteria	Betaproteobacteria					0	0	0	0	0	0	0	0	0	0	0	0	0	0	0	0	0	0	0	0	0	0	0	0	0	0	0	0	0.000239789	0	0	0	0	0	0	0	0	0	0	0	0	7.99297e-05
OTU_1055	1055	Proteobacteria	Deltaproteobacteria	Myxococcales	Haliangiaceae	Haliangium		0	0	0	0	0	0	0	0	0	0	0	0	0	0	0	0	0	0	0	0	0	0	0	0	0	7.99297e-05	0	7.99297e-05	0	0	0	0	0	0	0	0	0	0	0.000479578	0.000479578	0	0.000159859
OTU_957	957	Elusimicrobia	unidentified_Elusimicrobia	Lineage_IV				0	0	0	0	0	0	0	0	0	0	0	0	0	0	0	0	0	0	0	0	0	0	0	0	0	0	0	0	0	0	0	0	0	0	0	0	0	0	0.000159859	0.000319719	7.99297e-05	7.99297e-05
OTU_742	742	Gemmatimonadetes	unidentified_Gemmatimonadetes	unidentified_Gemmatimonadetes	S0134_terrestrial_group			0	0	0	0	0	0	0	0	0	0	0	0	0	0	0	0	0	0	0	0	0	0	0	0	0	0	0	0	0	0	0	0	0	0	0	0	0	0	0.000239789	7.99297e-05	0.000159859	0.000239789
OTU_1163	1163	Proteobacteria	Deltaproteobacteria	Bdellovibrionales	Bdellovibrionaceae	Bdellovibrio		0	0	0	0	0	0	0	0	0	0	0	0	0	0	0	0	0	0	0	0	0	0	0	0	0	0	0	0	7.99297e-05	0	0	0	0	0	0	0	0	7.99297e-05	7.99297e-05	7.99297e-05	7.99297e-05	0.000319719
OTU_841	841	Gemmatimonadetes	unidentified_Gemmatimonadetes	Gemmatimonadales	Gemmatimonadaceae	Gemmatimonas		0	0	0	0	0	0	0	0	0	0	0	0	0	0	7.99297e-05	0	0	0	0	0	0	0	0	7.99297e-05	7.99297e-05	0	0	0	0	0	0	0	0	0	0	0	0	0	0	0	7.99297e-05	7.99297e-05
OTU_507	507	Bacteroidetes	Sphingobacteriia	Sphingobacteriales	Saprospiraceae			0	0	0	0	0	0	0	0	0	0	0	0	0	0	0.000159859	0	0	0	0	0	0	0	0	0	0	0	0	7.99297e-05	0	0	0	0	0	0	0	0	0	0	0	0	0	0
OTU_4747	4747	Bacteroidetes	Flavobacteriia	Flavobacteriales	Flavobacteriaceae	Flavobacterium		0	0	0	0	0	0	0	0	0	0	0	0	0	0	0	0	0	0	0	0	0	0	0	0	0	0	0	0	0	0	0	0	0	0	0	0	7.99297e-05	0	0	7.99297e-05	0	0
OTU_1262	1262	Proteobacteria	Alphaproteobacteria	Rhizobiales	Hyphomicrobiaceae	Devosia	Devosia_soli	0	0	0	0	0	0	0	0	0	0	0	0	0	0	0	0	0	0	0	0.000319719	0	0	0	0	7.99297e-05	0	0	0	0	0	0	0	0	0	0.000159859	0	0	0	0	0	0	0
OTU_1863	1863	Bacteroidetes	Sphingobacteriia	Sphingobacteriales	KD3-93			0	0	0	0	0	0	0	0	0	0	0	0	0	0	7.99297e-05	7.99297e-05	0	0	0	0	0	0	0	0	0	0	7.99297e-05	0	0	0	0	0	0	0	0	0	0	7.99297e-05	0	0	0.000159859	0.000239789
OTU_1049	1049	Verrucomicrobia	Spartobacteria	Chthoniobacterales	Chthoniobacteraceae	Chthoniobacter		0	0	0	0	0	0	0	0	0	0	0	0	0	0	0	0	0	0	0	0	0	0	0	0	0	0	0	0	0	0	0	0	0	0	0	0	0	0	0	0	0	0
OTU_724	724	Bacteroidetes	Sphingobacteriia	Sphingobacteriales	Saprospiraceae	Phaeodactylibacter		0	0	0	0	0	0	0	0	0	0	0	0	0	0	0	0	0	0	0	0	0	0	0	0	0	0	0	0	0	0	0	0	0	7.99297e-05	0	0	7.99297e-05	0	7.99297e-05	0.000159859	0	0.000239789
OTU_646	646	Acidobacteria	unidentified_Acidobacteria	Subgroup_3	unidentified_Acidobacteria	Bryobacter		0	0	0	0	0	0	0	0	0	0	0	0	0	0	0	0	0	0	0	0	0	0	0	0	0	0	7.99297e-05	0	0	0	0	0	0	0	0	0	0	0	0.000159859	7.99297e-05	0	0
OTU_1235	1235	Bacteroidetes	Sphingobacteriia	Sphingobacteriales	Saprospiraceae			0	0	0	0	0	0	0	0	0	0	0	0	0	0	0	0	0	0	0	0	0	0	0	0	0	0	7.99297e-05	0	0	0	0	0	0	0	0	0	0	0.000159859	7.99297e-05	7.99297e-05	0	0.000159859
OTU_955	955	Acidobacteria	unidentified_Acidobacteria	Subgroup_4	unidentified_Acidobacteria	Blastocatella		0	0	0	0	0	0	0	0	0	0	0	0	0	0	0	0	0	0	0	0	0	0	0	0	0	0	0	0	0	0	0	0	0	0	0	0	0	0	7.99297e-05	0	7.99297e-05	0
OTU_738	738	Acidobacteria	unidentified_Acidobacteria	Subgroup_3	unidentified_Acidobacteria	Bryobacter		0	0	0	0	0	0	0	0	0	0	0	0	0	0	0	0	0	0	0	0	0	0	0	0	0	0	0	0	0	0	0	0	0	0	0	0	7.99297e-05	0	7.99297e-05	7.99297e-05	0	0
OTU_1628	1628	Proteobacteria	Alphaproteobacteria	Caulobacterales	Hyphomonadaceae	Hirschia		0	0	0	0	0	0	0	0	0	0	0	0	0	0	0	0	0	0	0	0	0	0	0	0	0	0	0	7.99297e-05	0	0	0	0	0	0.000319719	0	0	0	0	0	0	0	0
OTU_874	874	Verrucomicrobia	OPB35_soil_group					0	0	0	0	0	0	0	0	0	0	0	0	0	0	0	0	0	0	0	0	0	0	0	0	0	0	0	7.99297e-05	0	0	0	0	0	0	0	0	0	0	0	7.99297e-05	0	0
OTU_2839	2839	Bacteroidetes	Sphingobacteriia	Sphingobacteriales	PHOS-HE51			0	0	0	0	0	0	0	0	0	0	0	0	0	0	0	0	0	0	0	0	0	0	0	0	0	0	0	0	0	0	0	0	0	0	0	0	0	0	0	0.000159859	7.99297e-05	0.000159859
OTU_1329	1329	Proteobacteria	Gammaproteobacteria	NKB5	unidentified_NKB5	unidentified_NKB5	Legionella-like_amoebal_pathogen_HT99	0	0	0	0	0	0	0	0	0	0	0	0	0	0	0	0	0	0	0	0	0	0	0	0	0	0	0	0	0	0	0	0	0	0	0	0	0	0	0.000159859	7.99297e-05	0	7.99297e-05
OTU_1685	1685	Elusimicrobia	unidentified_Elusimicrobia	Lineage_IIb				0	0	0	0	0	0	0	0	0	0	0	0	0	0	0	0	0	0	0	0	0	0	0	0	0	0	0	0	0	0	0	0	0	0	0	0	0	0	0.000159859	0.000159859	0	0
OTU_963	963	Chlorobi	Chlorobia	Chlorobiales	OPB56			0	0	0	0	0	0	0	0	0	0	0	0	0	0	0	0	0	0	0	0	0	0	0	0	0	0	0	0	0	0	0	0	0	0	0	0	0	7.99297e-05	7.99297e-05	0	0	0
OTU_2011	2011	Proteobacteria	Betaproteobacteria	Rhodocyclales	Rhodocyclaceae			0	0	0	0	0	0	0	0	0	0	0	0	0	0	0	0	0	0	0	0	0	0	0	0	0	0	0	0	0	0	0	0	7.99297e-05	0	0	0	0	0	7.99297e-05	0.000159859	7.99297e-05	0
OTU_1661	1661	Bacteroidetes	Sphingobacteriia	Sphingobacteriales	env.OPS_17			0	0	0	0	0	0	0	0	0	0	0	0	0	0	0	0	0	0	0	0	0	0	0	0	0	0	0	0	0	0	0	0	0	0	0	0	0	0	7.99297e-05	0	0	7.99297e-05
OTU_1316	1316	Chlamydiae	unidentified_Chlamydiae	Chlamydiales	Parachlamydiaceae	Candidatus_Protochlamydia		0	0	0	0	0	0	0	0	0	0	0	0	0	0	0	0	0.000239789	0	0.000159859	0	0	0	0	0	0	0	0	0	0	0	0	0	0	0	0	0	0	0	0	0	7.99297e-05	7.99297e-05
OTU_999	999	Proteobacteria	TA18					0	0	0	0	0	0	0	0	0	0	0	0	0	0	0	0	0	0	0	0	0	0	0	0	0	0	0	0	0	0	0	0	0	0	0	0	0	0	0	0	0	7.99297e-05
OTU_889	889	Acidobacteria	Holophagae	Subgroup_7				0	0	0	0	0	0	0	0	0	0	0	0	0	0	0	0	0	0	0	0	0	0	0	0	0	0	0	0	0	0	0	0	0	0	0	0	0	0	0	0	0	0
OTU_1415	1415	Bacteroidetes	Sphingobacteriia	Sphingobacteriales	NS11-12_marine_group			0	0	0	0	0	0	0	0	0	0	0	0	7.99297e-05	0	0	0	0	0	0.000159859	0	0	0	0	0	0	0	0	0	0	0	0	0	0	0	0	0	0	0	0	0	0	0
OTU_1301	1301	Proteobacteria	Gammaproteobacteria	Oceanospirillales	Oceanospirillaceae	Pseudospirillum		0	0	0	0	0	0	0	0	0	0	0	0	0	0	0	0	0	0	0	0	0	0	0	0	0	0	0	0	0	0	0	0	0	0	0	0	0	0	0	0	0	0
OTU_1725	1725	Proteobacteria	Betaproteobacteria					0	0	0	0	0	0	0	0	0	0	0	0	0	0	0	0	0	0	0	0	0	0	0	0	0	0	0	0	0	0	0	0	0	0	0	0	0	0	0	0	0	0
OTU_2245	2245	Proteobacteria	Gammaproteobacteria	Xanthomonadales				0	0	0	0	0	0	0	0	0	0	0	0	0	0	0	0	0	0	0	0	0	0	0	0	0	0	0	0	0	0	0	0	0	0	0	0	0	0	0	0	7.99297e-05	0
OTU_1995	1995	Proteobacteria	Deltaproteobacteria	Myxococcales	mle1-27			0	0	0	0	0	0	0	0	0	0	0	0	0	0	0	0	0	0	0	0	0	0	0	0	0	0	0	0	0	0	0	0	0	0	0	0	0	0	0	0	0	0
OTU_2424	2424	Proteobacteria	Gammaproteobacteria	Chromatiales	Ectothiorhodospiraceae	Acidiferrobacter		0	0	0	0	0	0	0	0	0	0	0	0	0	0	0	0	0	0	0	0	0	0	0	0	0	0	0	0	0	0	0	0	0	0	0	0	0	0	0	0	0	0
OTU_2159	2159	Proteobacteria	Gammaproteobacteria	Chromatiales	Ectothiorhodospiraceae	Acidiferrobacter		0	0	0	0	0	0	0	0	0	0	0	0	0	0	0	0	0	0	0	0	0	0	0	0	0	0	0	0	0	0	0	0	0	0	0	0	0	0	0	0	0	0
OTU_2600	2600	Proteobacteria	Gammaproteobacteria	Pseudomonadales	Moraxellaceae			0	0	0	0	0	0	0	0	0	0	0	0	0	0	0	0	0	0	0	0	0	0	0	0	0	0	0	0	0	0	0	0	0	0	0	0	0	0	0	0	0	0
OTU_1507	1507	Proteobacteria	Alphaproteobacteria	Rhizobiales	Rhizobiaceae	Ensifer		0.0212613	0.0152666	0.0111902	0.0043162	0.00919191	0.00375669	0.0131884	0.0132683	0.00551515	0.0043162	0.0101511	0.0183039	0.0166254	0.0203021	0.0106306	0.00303733	0.0135081	0.00967149	0.00175845	0	0	0	0.000479578	0.000159859	7.99297e-05	0.000319719	7.99297e-05	7.99297e-05	0.000159859	0	0.000239789	7.99297e-05	0.000159859	0	0	0	7.99297e-05	7.99297e-05	0.000239789	0.000159859	0.000239789	0.000239789
OTU_2140	2140	Actinobacteria	unidentified_Actinobacteria	Micrococcales	Microbacteriaceae			0	0	0	0	0	7.99297e-05	0.00175845	7.99297e-05	0.00151866	0.0183838	0.00471585	0.00111902	0.00127887	7.99297e-05	0.00207817	0.00639437	0.00455599	0.0080729	0.00159859	0.000239789	7.99297e-05	7.99297e-05	0	0.000159859	0.000479578	0.00111902	0	0.000239789	0.000159859	7.99297e-05	0.000879226	0.000159859	0.000639437	0	0.000239789	7.99297e-05	7.99297e-05	0	0.000799297	0.000319719	7.99297e-05	0.000239789
OTU_1669	1669	Actinobacteria	unidentified_Actinobacteria	Micrococcales	Microbacteriaceae	Leifsonia	Leifsonia_aquatica	0	0.00591479	0	0	7.99297e-05	0.00463592	0.000239789	0	7.99297e-05	0.000959156	0	0.00271761	0	0	0.00359683	0	0	0.00279754	0	7.99297e-05	0.000239789	0	0	0.000239789	0.00263768	0.000399648	7.99297e-05	0.000399648	0.000239789	0.00167852	7.99297e-05	0.000479578	0.000399648	0.000559508	0.000399648	7.99297e-05	0.000159859	0.000159859	0.000319719	0.000239789	0.000399648	0.000159859
OTU_189	189	Proteobacteria	Alphaproteobacteria	Rhizobiales	Rhizobiaceae	Neorhizobium		0	0	0	0	0.0029574	0	0.00487571	0	0	0	0	0.000159859	0	0	0	0	0	0	0	0	0.0013588	0	7.99297e-05	0.000159859	0.00167852	0.000639437	0	0	0	0	0.0029574	0.000719367	0.0021581	0.00391655	0	0.000879226	0.000559508	0.000159859	7.99297e-05	0.000239789	0.000239789	0.000159859
OTU_214	214	Proteobacteria	Alphaproteobacteria	Rhizobiales	Aurantimonadaceae	Aureimonas		0	0	0	0	0	0.000479578	0	0	0.0114299	7.99297e-05	0	0.000639437	7.99297e-05	0	0	0.00223803	0	0	7.99297e-05	0.000319719	0	0	0	0	0.00327712	0.000159859	0	0.000319719	0.000719367	0	0	0.000159859	0.000479578	0.00103909	0.000159859	0.000559508	0	0	0.000479578	0.000239789	0.000159859	0.000479578
OTU_250	250	Proteobacteria	Alphaproteobacteria	Rhizobiales	Hyphomicrobiaceae	Hyphomicrobium		0	0	0	0	0	0	0	0	0	0	0	7.99297e-05	7.99297e-05	0.000239789	0.000239789	7.99297e-05	0	0.000239789	0	7.99297e-05	0.000479578	7.99297e-05	0	0	0.000159859	0.000159859	0	0.000159859	0.000399648	0	0.000159859	0.000159859	0.000479578	0.000319719	0.000239789	0	0	7.99297e-05	0.000559508	0.000879226	0.000879226	0.000799297
OTU_4826	4826	Proteobacteria	Alphaproteobacteria	Rhizobiales	Bradyrhizobiaceae	Bosea	Bosea_thiooxidans	0	0	0	0	0	0	0	0	0	0	0	0.000159859	0	0	0	0.00255775	0	0.000959156	0	0.000239789	0	0.000319719	7.99297e-05	0	0.000639437	7.99297e-05	0	0	0.000319719	0.000559508	0.00111902	0.000559508	0.000319719	0.0013588	0.000319719	0	0	0	0.000159859	0.000159859	0.000479578	0.000319719
OTU_335	335	Proteobacteria	Alphaproteobacteria	Rhodobacterales	Rhodobacteraceae	Amaricoccus		0	0	0	0	0	0	0	0	0	0.000159859	0	0	0.000479578	0	0.000239789	0	0	0	0	0	0	0	0	0	0	7.99297e-05	0	7.99297e-05	0	0	7.99297e-05	0	0	0	0	0	0	0	0.000319719	0.000799297	0.000559508	0.000479578
OTU_190	190	Proteobacteria	Deltaproteobacteria	Bdellovibrionales	Bdellovibrionaceae	Bdellovibrio		0	0	0	0	0.0123092	0	0	0	0	0	0	0	0	0	0	0	0	0	0	0	0	0	0	0	0	0	0	0	0	0	0	0	0	0	0	0	0	0	0	7.99297e-05	0	0.000159859
OTU_674	674	Proteobacteria	Deltaproteobacteria	Myxococcales				0	0	0	0	0	0	0	0	0	0	0	0	0	0	7.99297e-05	0	0	0	0	0	0	0	0	0	0	0	0.000239789	0	0	0	0	0	0	0	0	0	0	0	0.0013588	0.00127887	0.000799297	0.00143873
OTU_1787	1787	Bacteroidetes	Flavobacteriia	Flavobacteriales	Flavobacteriaceae	Flavobacterium		0	0	0	0	0	0	0	0	0	0	0	0	7.99297e-05	0	0	0.00119894	0	0.000159859	0	0	0.000239789	0	7.99297e-05	0.000159859	7.99297e-05	7.99297e-05	0	0.000319719	0.000479578	0	7.99297e-05	7.99297e-05	0.000319719	0	7.99297e-05	7.99297e-05	7.99297e-05	0.000159859	0.000239789	0.000639437	0.000319719	0.000239789
OTU_527	527	Proteobacteria	Alphaproteobacteria	Rhizobiales	P-102			0	0	0	0	0	0	0	0	0	0	0	0	7.99297e-05	0	0	0	0	0	0	0	0	0	0	0	0	0	0	0	0	0	0	0	0	0	0	0	0	0	0.000959156	0.00111902	0.000959156	0.000799297
OTU_899	899	Bacteroidetes	Sphingobacteriia	Sphingobacteriales	Saprospiraceae			0	0	0	0	0	0	0	0	0	0	0	0	0	0	0.000159859	0	0	0	0	0	0	0	0	0	0	0	0	0	0	0	0	0	0	0	0	0	7.99297e-05	0	0.000879226	0.000399648	0.000159859	0.0013588
OTU_361	361	Actinobacteria	Thermoleophilia	Gaiellales	Gaiellaceae	Gaiella		0	0	0	0	0	0	0	0	0	0	0	0	0	0	0	0	0	0	0	0	0	0	0	0	0	0	0	0	0	0	0	0	0	7.99297e-05	0	0	7.99297e-05	7.99297e-05	0.000559508	0.000719367	0.000399648	0.000479578
OTU_791	791	Actinobacteria	Thermoleophilia	Solirubrobacterales	480-2			0	0	0	0	0	0	0	0	0	0	0	0	0	0	0	0	0	0	0	0	0	0	0	0	0	0	0	0	0	0	0	0	7.99297e-05	0	0	0	7.99297e-05	0	0.000719367	0.000559508	0.000479578	0.000479578
OTU_178	178	Proteobacteria	Betaproteobacteria					0	0	0	0	0	0	0	0	0	0	0.000959156	0	0	0	0	0	0	0	0	0	0	0	0	7.99297e-05	0	0	0	0	0	0	0	0	0	0	0	0	7.99297e-05	0	0	0	0	0
OTU_411	411	Gemmatimonadetes	unidentified_Gemmatimonadetes	Gemmatimonadales	Gemmatimonadaceae			0	0	0	0	0	0	0	0	0	0	0	0	0	0	0	0	0	0	0	0	0	0	0	0	7.99297e-05	0	0	0	0	7.99297e-05	0	0	0	0	0	0	0	0	0.00127887	0.00111902	0.00111902	0.00103909
OTU_600	600	Proteobacteria	Deltaproteobacteria	Myxococcales				0	0	0	0	0	0	0	0	0	0	0	7.99297e-05	0	0	0	0	0	0	0	0	0	0	0	0	0	0	0	0	0	0	0	0	0	0	0	0	7.99297e-05	0	0.000799297	0.000239789	0.000959156	0.000399648
OTU_201	201	Proteobacteria	Betaproteobacteria	Burkholderiales	Alcaligenaceae			0	0	0	0	0	0	0	0	0	0	0	0	0	0	0	0	0	0	0	0	0	0	0	7.99297e-05	0	7.99297e-05	0	0	0	0	7.99297e-05	0	0	0	0	0	0	0	0.000239789	7.99297e-05	0.000399648	0.000559508
OTU_979	979	Bacteroidetes	Sphingobacteriia	Sphingobacteriales	Saprospiraceae			0	0	0	0	0	0	0	0	0	0	0	0.000479578	0	0	7.99297e-05	0	0	0	0	0	0	0	0	0	0	7.99297e-05	0	0.000239789	0	0	0	0	0	0	0	0	0	0	0.000479578	0.000399648	0.000239789	0.000639437
OTU_387	387	Proteobacteria	Alphaproteobacteria	Rhodospirillales	unidentified_Rhodospirillales	Candidatus_Alysiosphaera		0	0	0	0	0	0	0	0	0	0	0	0	0	0	7.99297e-05	0	0	0	0	0	0	0	0	0	0	0	0	0	0	0	0	0	0.000159859	0	0	0	0	0	0.000559508	0.000239789	0.000479578	0.000159859
OTU_1688	1688	Proteobacteria	Alphaproteobacteria	Sphingomonadales	Sphingomonadaceae	Sphingobium		0	0.00159859	0	0	0	0	7.99297e-05	0	0	0	0	0	0	0	0.000719367	0	0	0	0	0	0.000239789	0	0	0.000159859	0.000479578	0.000319719	0	0.000319719	0.000399648	0	0	0	0.000799297	0	0	0	0	0	7.99297e-05	0.000159859	0	0.000319719
OTU_3583	3583	Proteobacteria	Deltaproteobacteria	Myxococcales	Phaselicystidaceae	Phaselicystis		0	0	0	0	0	0	0	0	0.00167852	0	0	0	0	0	0	0	0	0	0	0	0	0	0	0	0	0	0	0	0	0	0	0	0	0	0	0	0	0	0.000319719	0.000239789	0	0.000239789
OTU_1128	1128	Proteobacteria	Deltaproteobacteria	Myxococcales	Haliangiaceae	Haliangium		0	0	0	0	0	0	0	0	0	0	0	0	7.99297e-05	0	0	0.000239789	0	0	0	0	0	0	0	7.99297e-05	0	0	0	0	0.0013588	0	0	0	7.99297e-05	0	0	0	0	0	0.000559508	0.000399648	0.000559508	0.000159859
OTU_808	808	Proteobacteria	Betaproteobacteria	TRA3-20				0	0	0	0	0	0	0	0	0	0	0	0	7.99297e-05	0	0	0	0	7.99297e-05	0	0	0	0	0	0	0	0	0	7.99297e-05	0	0	0	0	0	0.000159859	0	0	0	0	0.000879226	0.000479578	0.00143873	0.000799297
OTU_669	669							0	0	0	0	0	0	0	0	0	0	0	0	0	0	7.99297e-05	0	0	0	0	0	0	0	0	0	0	7.99297e-05	0.000239789	7.99297e-05	7.99297e-05	0	7.99297e-05	0	0	0.000159859	7.99297e-05	0	0	7.99297e-05	0.000159859	7.99297e-05	0.000239789	0.000319719
OTU_512	512	Verrucomicrobia	OPB35_soil_group					0	0	0	0	0	0	0	0	0	0	0	0	7.99297e-05	0	0	0	0	0	0	0	0	0	0	0	0	0	0	0	0	0	0	0	0	0	0	0	0	0	0.000799297	0.000639437	0.000479578	0.000559508
OTU_484	484	Bacteroidetes	Bacteroidetes_VC2.1_Bac22					0	0	0	0	0	0	0	0	0	0	0	0	0	0	7.99297e-05	0	7.99297e-05	0	0	0	0	0	0	0	0	0	0	0	0	0	0	0	0	0	0	0	0	0	0.000239789	0.000319719	0.000159859	0.000319719
OTU_530	530	Bacteroidetes	Cytophagia	Cytophagales	Cytophagaceae			0	0	0	0	0	0	0	0	0	0	0	0	0	0	0	0	0	0	0	7.99297e-05	0	0	7.99297e-05	0	0	0	0	0.000159859	0	0	0	0.000319719	0	0	0	0	0	0	0.000319719	0.000159859	0.000719367	7.99297e-05
OTU_796	796	Bacteroidetes	Sphingobacteriia	Sphingobacteriales	Chitinophagaceae	Ferruginibacter		0	0	0	0	0	0	0	0	0	0	7.99297e-05	0	0	0	0	0	0	0	0	0	0	0	0	0	0	0	0	0	7.99297e-05	0	0	0.000159859	0	0	0	0	0	7.99297e-05	7.99297e-05	0	7.99297e-05	7.99297e-05
OTU_3953	3953	Proteobacteria	Alphaproteobacteria	Caulobacterales	Caulobacteraceae	Brevundimonas		0	0	0	0	0	0	0	0	0	0	7.99297e-05	0	7.99297e-05	0	0	0	0	0	0	0	0	0	0	0	7.99297e-05	0	0	0	7.99297e-05	0	0	7.99297e-05	0	0	0	0	0	0	0.000239789	0	7.99297e-05	0.000159859
OTU_564	564	Actinobacteria	Acidimicrobiia	Acidimicrobiales				0	0	0	0	0	0	0	0	0	0	0	0	7.99297e-05	0	0	0	0	0	0	0	0	0	0	0	0	0	0	0	0	0	0	0	0.000559508	0	0	0	0	0	0.000159859	7.99297e-05	7.99297e-05	0.000159859
OTU_787	787	Actinobacteria	Acidimicrobiia	Acidimicrobiales	unidentified_Acidimicrobiales	Candidatus_Microthrix		0	0	0	0	0	0	0	0	0	0	0	0	0	0	0	0	0	0	0	0	0	0	0	0	0	0	0	7.99297e-05	0	0	0	0.000239789	7.99297e-05	0	0	0	0	0	7.99297e-05	0.000159859	0.000319719	0
OTU_3737	3737	Proteobacteria	Alphaproteobacteria	Rhizobiales	Phyllobacteriaceae			0	0	0	0	0	0	0	0	0	0	0	0	0	0	0	0	0	0	0	0	0	0	0	0	7.99297e-05	0	0	0	0	0	7.99297e-05	0	0	0	0	0	0	0	0.000159859	0.000159859	0.000159859	7.99297e-05
OTU_726	726	Proteobacteria	Deltaproteobacteria	Myxococcales	Haliangiaceae	Haliangium		0	0	0	0	0	0	0	0	0	0	0	0	0	0	0	0	0	0	0	0	0	0	0	0	0	7.99297e-05	0	0	0	0	0	0	0	0	0	0	0	0	0.000319719	0.000639437	0	0.000319719
OTU_588	588	Acidobacteria	unidentified_Acidobacteria	Subgroup_4	unidentified_Acidobacteria	Blastocatella		0	0	0	0	0	0	0	0	0	0	0	0	0	0	0	0	0	0	0	0	0	0	0	7.99297e-05	0	7.99297e-05	0	0	0	0	0	0	0	0	0	0	0	0	0	7.99297e-05	0	0
OTU_572	572	Proteobacteria	Deltaproteobacteria	Myxococcales	Blfdi19			0	0	0	0	0	0	0	0	0.00159859	0	0	0	0	0	0	0	0	0	0	0	0	0	0	0	0	0	0	0	0	0	0	0	0	0	0	0	0	7.99297e-05	0	0.000159859	0	7.99297e-05
OTU_1869	1869	Proteobacteria	Deltaproteobacteria	Oligoflexales				0	0	0	0	0	0	0	0	0	0	0	0	0	0	0	0	0	0	7.99297e-05	7.99297e-05	0	0	0	0	0	0	0	0	0	0	0	0	0	0	0	0	0.000159859	0	0.000159859	0.000159859	0.000159859	0.000559508
OTU_723	723	Bacteroidetes	Bacteroidia	Bacteroidales	Porphyromonadaceae	Dysgonomonas		0	0	0	0	0	0	0	0	0	0	0	0	0	0	0	0	0	0	0	0	0	7.99297e-05	0	0	0	0	0	0	0	0	0	0	0	0	0	0	0	0	0	0	0	0
OTU_895	895	Bacteroidetes	Sphingobacteriia	Sphingobacteriales	PHOS-HE51			0	0	0	0	0	0	0	0	0	0	0	0	7.99297e-05	0	0	7.99297e-05	0	0	7.99297e-05	0	0	0	0	7.99297e-05	0	0	0	0	7.99297e-05	0	0	0	0	0	0	0	0	0	0.000239789	0.000239789	0.000159859	0.000319719
OTU_4044	4044	Bacteroidetes	Sphingobacteriia	Sphingobacteriales	NS11-12_marine_group			0	0	0	0	0	0	0	0	0	0	0	0	0	0	0	0	0	0	0	0	0	0	0	0	0	0	0	7.99297e-05	0	0	0	0	0	0	0	0	0	0	0.000159859	0.000239789	7.99297e-05	0.000319719
OTU_794	794	Planctomycetes	vadinHA49					0	0	0	0	0	0	0	0	0	0	0	7.99297e-05	0	0	0	0.000159859	0	0	0	0	0	0	0	0	0	7.99297e-05	0	7.99297e-05	0	0	0	0	0	0.000159859	0	0	7.99297e-05	7.99297e-05	0.000239789	0.000159859	0	0.000239789
OTU_4339	4339	Proteobacteria	Alphaproteobacteria	Caulobacterales	Caulobacteraceae	Caulobacter		0	0	0	0	0	0	0	0	0	0	0	0	0	0	0	0	0	0	0	0	0	0	0	0	0	0	0	0	7.99297e-05	0	0	0	0	0	0	0	0	0	0	0	0	0.000239789
OTU_1343	1343	Proteobacteria	Deltaproteobacteria	Myxococcales	Sandaracinaceae	Sandaracinus		0	0	0	0	0	0	0	0	0	0	0	0	0	0	0	0	0	0	0	0	0	0	0	0	0	0	0	0	0	0	0	0.000159859	0	0	0	0	0	0	7.99297e-05	7.99297e-05	7.99297e-05	0
OTU_505	505	Acidobacteria	unidentified_Acidobacteria	Subgroup_4	unidentified_Acidobacteria	Blastocatella		0	0	0	0	0	0	0	0	0	0	0	7.99297e-05	0	0	0	0	0	0	0	0	0	0	0	0	0	0	0	0	0	0	0	0	0	0	0	0	0	0	0	0	7.99297e-05	0
OTU_4907	4907	Proteobacteria	Alphaproteobacteria	Rhizobiales				0	0	0	0	0	0	0	0	0	0	0	0	7.99297e-05	0	0	0	0	0	0	0	0.000319719	0	0	0	7.99297e-05	0	0	0	0	0	0	0	0	0.000799297	7.99297e-05	0	0	0	0.000159859	0	0	0
OTU_1704	1704	Actinobacteria	unidentified_Actinobacteria	Frankiales	Geodermatophilaceae	Modestobacter		0	0	0	0	0	0	0	0	0	0	0	0	0	0	0	0	0	0	0	0	0	0	0	0	0	0	0	0	0	7.99297e-05	0	0	0	7.99297e-05	0	0	0	0	0.000399648	0.000159859	0	0
OTU_2979	2979	Proteobacteria	Alphaproteobacteria	Sphingomonadales				0	0	0	0	0	0	0	0	0	0	0	0	0	0	0	0	0	0	0	0	0	0	0	0	0	0	0	0	0	0	0	0	0	0	0	0	0	7.99297e-05	7.99297e-05	7.99297e-05	0	7.99297e-05
OTU_709	709	Planctomycetes	Phycisphaerae	Phycisphaerales	Phycisphaeraceae	SM1A02		0	0	0	0	0	0	0	0	0	0	0	0	0	0	0	0	0	7.99297e-05	0	0	0	0	0	0	0	0.000159859	0	7.99297e-05	7.99297e-05	0	0	0	0	7.99297e-05	0	0	0	7.99297e-05	7.99297e-05	7.99297e-05	7.99297e-05	7.99297e-05
OTU_477	477	Proteobacteria	Gammaproteobacteria	Xanthomonadales				0	0	0	0	0	0	0	0	0	0	0	0	0	0	0	0	0	0	0	0	0	0	0	0	0	0	0	0	0	0	0	0	0	0	0	0	0	0	0	0	0.000559508	0.000159859
OTU_3206	3206	Proteobacteria	Betaproteobacteria	Nitrosomonadales	Nitrosomonadaceae			0	0	0	0	0	0	0	0	0	0	0	0	0	0	0	0	0	0	0	0	0	0	0	0	0	0	0	7.99297e-05	0	0	0	0	0	0	0	0	0	0	0.000399648	0.000239789	0.000239789	0.000159859
OTU_2204	2204	Acidobacteria	unidentified_Acidobacteria	Subgroup_6				0	0	0	0	0	0	0	0	0	0	0	0	0	0	0	0	0	0	0	0	0	0	0	0	0	0	0	0	0	0	0	0	0	0	0	0	0	0	0	0	0	0
OTU_1020	1020	Chlorobi	Chlorobia	Chlorobiales	OPB56			0	0	0	0	0	0	0	0	0	0	0	0.000159859	0	0	0	0	0	0	0	0	0	0	0	0	0	0	0	0	0	0	0	0	0	0	0	0	7.99297e-05	0	7.99297e-05	7.99297e-05	7.99297e-05	0
OTU_1120	1120	Proteobacteria	Deltaproteobacteria	Myxococcales	Haliangiaceae	Haliangium		0	0	0	0	0	0	0	0	0	0	0	0	0	0	0	0	0	0	0	0	0	0	0	0	0	0	0	0	0	0	0	0	0	0	0	0	0	0	0.000159859	0	0.000319719	0.000239789
OTU_2164	2164	Verrucomicrobia	OPB35_soil_group					0	0	0	0	0	0	0	0	0	0	0	0	0	0	0	0	0	0	0	0	0	0	0	0	0	0	0	0	0	0	0	0	0.000159859	0	0	0	0	0	0	0	0.000159859	0
OTU_1903	1903	Proteobacteria	Deltaproteobacteria	Bdellovibrionales	Bacteriovoracaceae	Bacteriovorax		0	0	0	0	0	0	0	0	0	0	0	0	0	0	0	0	0	0	0	0	0	0	0	0.000159859	0.000399648	0	0	0	0	0	0	0	0	0	0	0	0	0	0	7.99297e-05	7.99297e-05	7.99297e-05
OTU_4127	4127	Bacteroidetes	Sphingobacteriia	Sphingobacteriales	env.OPS_17			0	0	0	0	0	0	0	0	0	0	0	0	0	0	0	0	0	0	0.000159859	0	0	0	0	0	0	0.000159859	0	0	0	0	0	0	0	0	0	0	0	7.99297e-05	0.000239789	0	0	0.000399648
OTU_1104	1104	Armatimonadetes						0	0	0	0	0	0	0	0	0	0	0	0	0	0	0	0	0	0	0	0	0	0	0	0	0	0	0	0	0	0	0	0	0	0	0	0	0	0	0.000159859	7.99297e-05	0	7.99297e-05
OTU_2039	2039	Bacteroidetes	Sphingobacteriia	Sphingobacteriales	Chitinophagaceae			0	0	0	0	0	0	0	0	0	0	0	7.99297e-05	0	0	0	0	0	0	0	0	0	0	0	0	0	0	0	0	0	0	7.99297e-05	0	7.99297e-05	0	0	0	0	0	7.99297e-05	7.99297e-05	0.000159859	0.000159859
OTU_1552	1552	Proteobacteria	Alphaproteobacteria	Rhodobacterales	Rhodobacteraceae	Rubellimicrobium		0	0	0	0	0	0	0	0	0	0	0.000159859	0	0	0	0	0	0	0	0	0	0	0	0	0	0	0	0	0	0	0	0	0	0	0	0	0	0	0	0	0	0	0
OTU_713	713	Acidobacteria	Holophagae	Subgroup_7				0	0	0	0	0	0	0	0	0	0	0	0	0	0	0	0	0	0	0	0	0	0	0	0	0	0	0	0	0	0	0	0	0	0	0	0	0	0	7.99297e-05	0	0	0.000159859
OTU_1036	1036	Bacteroidetes	Sphingobacteriia	Sphingobacteriales	env.OPS_17			0	0	0	0	0	0	0	0	0	0	0	0	0	0	0	0	0	0	0	0	0	0	0	0	0	0	0	0	0	0	0	0	0	0	0	0	0	0	0	0.000159859	0	0.000239789
OTU_931	931	Bacteroidetes	Cytophagia	Cytophagales	Cytophagaceae			0	0	0	0	0	0	0	0	0	0	0	0	0	0	0	0	0	0	0	0	0	0	0	0	0	0	0	0	0	0	0	0	0	0	0	0	7.99297e-05	0	0.000159859	7.99297e-05	0.000159859	0
OTU_2771	2771	Actinobacteria	unidentified_Actinobacteria	Micromonosporales	Micromonosporaceae	Actinoplanes	Actinoplanes_roseosporangius	0	0	0	0	0	0	0	0	0	0	0	0	0	0	0	0	0	0	0	0	0	0	0	0	0	0	0	0	7.99297e-05	0	0	0	0	0	0	0	0	0	7.99297e-05	0	0.000319719	0
OTU_4789	4789	Verrucomicrobia	Spartobacteria	Chthoniobacterales	Chthoniobacteraceae	Chthoniobacter		0	0	0	0	0	0	0	0	0	0	0	0	0	0	0	7.99297e-05	0	0	0	0	0	0	0	0	0	0	0	0	0.000159859	0	0	0	0	0	0	0	0	0	0	0	0	0
OTU_1348	1348	Proteobacteria	Deltaproteobacteria	Myxococcales	Nannocystaceae	Nannocystis		0	0	0	0	0	0	0	0	0	0	0	0	0	0	0	0	0	0.000239789	0	0	0	0	0	0	0	0	0	0	0	7.99297e-05	0	0	7.99297e-05	0	0	0	0	0	0	7.99297e-05	0.000239789	0
OTU_1796	1796	Proteobacteria	Gammaproteobacteria					0	0	0	0	0	0	0	0	0	0	0	0	0	0	7.99297e-05	0	0	0	0	0	0	0	0	0	0	0	0	0	0	0	0	0	0	0	0	0	0	0	0	0	0	7.99297e-05
OTU_1502	1502	Bacteroidetes	Cytophagia	Cytophagales	Cytophagaceae			0	0	0	0	0	0	0	0	0	0	0	0	0	0	0	0	0	0	0	0	0	0	0	0	0	0	0	0	0	0	0	0	0	0	0	0	0	0	7.99297e-05	0	0	0
OTU_1190	1190	Proteobacteria	Deltaproteobacteria	Bdellovibrionales	Bdellovibrionaceae	Bdellovibrio		0	0	0	0	0	0	0	0	0	0	0	0	0	0	0	0	0	0	0	0	0	0	0	0.000159859	0	0	0	0	0	0	0	0	0	0	0	0	0.000159859	0	0	0	0	0
OTU_1013	1013	Latescibacteria						0	0	0	0	0	0	0	0	0	0	0	0	0	0	0	0	0	0	0	0	0	0	0	0	0	0	0	0	7.99297e-05	0	0	0	0	0	0	0	0	0	7.99297e-05	0	7.99297e-05	0
OTU_1485	1485	Acidobacteria	unidentified_Acidobacteria	Subgroup_3	unidentified_Acidobacteria	Bryobacter		0	0	0	0	0	0	0	0	0	0	0	0	0	0	0	0	0	0	0	0	0	0	0	0	0	0	0	0	0	0	0	0	0	0	0	0	0	7.99297e-05	7.99297e-05	7.99297e-05	0.000159859	0
OTU_1035	1035	Bacteroidetes	Sphingobacteriia	Sphingobacteriales	NS11-12_marine_group			0	0	0	0	0	0	0	0	0	0	0	0	0	0	0	0	0	0.000879226	0	0	0	0	0	0	0	0	0	0	0	0	0	0	0	0	0	0	0	0	0	0	0.000239789	0
OTU_997	997	Proteobacteria	Alphaproteobacteria	Rhizobiales	Hyphomicrobiaceae	Pedomicrobium		0	0	0	0	0	0	0	0	0	0	0	0	0	0	0	0	0	0	0	0	0	0	0	0	0	0	0	0	0	0	0	0	0	0	0	0	0	0	0	0	0	0
OTU_1157	1157	Acidobacteria	Holophagae	Subgroup_10	ABS-19			0	0	0	0	0	0	0	0	0	0	0	0	0	0	0	0	0	0	0	0	0	0	0	0	0	0	0	0	0	0	0	0	0	0	0	0	0	0	0	0	0.000239789	0
OTU_1463	1463	Proteobacteria	Deltaproteobacteria	Myxococcales	P3OB-42			0	0	0	0	0	0	0	0	0	0	0	0	0	0	0	0	0	0	0	0	0	0	0	0	0	0	0	0	0	0	0	0	0	0	0	0	0	0	7.99297e-05	0	0	0
OTU_4471	4471	Acidobacteria	unidentified_Acidobacteria	Subgroup_4	unidentified_Acidobacteria	Blastocatella		0	0	0	0	0	0	0	0	0	0	0	0	0	0	0	0	0	0	0	0	0	0	0	0	0	0	0	0	0	0	0	0	0	0	0	0	0	0	0	0	0	0
OTU_1494	1494	Chloroflexi	Chloroflexia	Chloroflexales	Roseiflexaceae	Roseiflexus		0	0	0	0	0	0	0	0	0	0	0	7.99297e-05	0	0	0	0	0	0	0	0	0.000319719	0	0	0	0	7.99297e-05	0	0	0	0	0	0	0	0	0	0	0	0	7.99297e-05	7.99297e-05	0	0
OTU_1238	1238	Acidobacteria	Holophagae	Subgroup_10	ABS-19			0	0	0	0	0	0	0	0	0	0	0	0	0	0	0	0	0	0	0	0	0	0	0	0	0	0	0	0	0	0	0	0	0	0	0	0	0	0	0.000159859	7.99297e-05	0.000159859	0
OTU_1106	1106	Proteobacteria	Alphaproteobacteria	Rickettsiales	SM2D12			0	0	0	0	0	0	0	0	0	0	0	0	0	0	0	0	0	0	0	0	0	0	0	0	0	0	0	0	0	0	0	0	0	0	0	0	0	0	0	0	0	0
OTU_1053	1053	Proteobacteria	Betaproteobacteria	Rhodocyclales	Rhodocyclaceae	Azoarcus		0	0	0	0	0	0	0	0	0	0	0	0	0	0	0	0	0	0	0	0	0	0	0	0	0	0	0	0	0	0	0	0	0	0	0	0	0	0	0	0	0	0
OTU_1046	1046	Actinobacteria	unidentified_Actinobacteria	Corynebacteriales	Nocardiaceae	Nocardia	Nocardia_cummidelens	0	0	0	0	0	0	0	0	0	0	0	0	0	0	0	0	0	0	0	0	0	0	0	0	0	0	0	0	0	0	0	0	0	0	0	0	0	0	7.99297e-05	0	0	0
OTU_1974	1974	Proteobacteria	Alphaproteobacteria	Rickettsiales	SM2D12			0	0	0	0	0	0	0	0	0	0	0	0	0	0	0	0	0	0	0	0	0	0	0	0	0	0	0	0	0	0	0	0	0	0	0	0	0	0	0	7.99297e-05	0.000239789	0.000399648
OTU_737	737	Proteobacteria	TA18					0	0	0	0	0	0	0	0	0	0	0	0	0	0	0	0	0	0	0	0	0	0	0	0	0	0	0	0	0	0	0	0	0	0	0	0	0	0	0	0	0	0
OTU_935	935	Acidobacteria	unidentified_Acidobacteria	Subgroup_17				0	0	0	0	0	0	0	0	0	0	0	0	0	0	0	0	0	0	0	0	0	0	0	0	0	0	0	0	0	0	0	0	0	0	0	0	0	0	0	0	0	0
OTU_1034	1034	Chlorobi	Chlorobia	Chlorobiales	OPB56			0	0	0	0	0	0	0	0	0	0	0	0	0	0	0	0	0	0	0	0	0	0	0	0	0	0	0	0	0	0	0	0	0	0	0	0	0	0	0	0	0	0.000159859
OTU_1887	1887	Proteobacteria	Deltaproteobacteria	Oligoflexales				0	0	0	0	0	0	0	0	0	0	0	0	0	0	0	0	0	0	0	0	0	0	0	0	0.000159859	0	0	0	0	0	0	0	0	0	0	0	0	0	0	0	0	0
OTU_1820	1820	Proteobacteria	Alphaproteobacteria					0	0	0	0	0	0	0	0	0	0	0	0	0	0	0	0	0	0	0	0	0	0	0	0	0	0	0	0	0	0	0	0	0	0	0	0	0	0	0	0	0	0
OTU_2264	2264	Acidobacteria	unidentified_Acidobacteria	Subgroup_4	unidentified_Acidobacteria	Blastocatella		0	0	0	0	0	0	0	0	0	0	0	0	0	0	0	0	0	0	0	0	0	0	0	0	0	0	0	0	0	0	0	0	0	0	0	0	0	0	0	0	0	0
OTU_1800	1800	Elusimicrobia	unidentified_Elusimicrobia	FCPU453				0	0	0	0	0	0	0	0	0	0	0	0	0	0	0	0	0	0	0	0	0	0	0	0	0	0	0	0	0	0	0	0	0	0	0	0	0	0	0.000159859	0.000159859	0	7.99297e-05
OTU_2117	2117	Gemmatimonadetes	unidentified_Gemmatimonadetes					0	0	0	0	0	0	0	0	0	0	0	0	0	0	0	0	0	0	0	0	0	0	0	0	0	0	0	0	0	0	0	0	0	0	0	0	0	0	0	0	0	7.99297e-05
OTU_1991	1991	Gemmatimonadetes	unidentified_Gemmatimonadetes	AT425-EubC11_terrestrial_group				0	0	0	0	0	0	0	0	0	0	0	0	0	0	0	0	0	0	0	0	0	0	0	0	0	0	0	0	0	0	0	0	0	0	0	0	0	0	0	0	0	0
OTU_1278	1278	Hydrogenedentes						0	0	0	0	0	0	0	0	0	0	0	0	0	0	0	0	0	0	0	0	0	0	0	0	0	0	0	0	0	0	0	0	0	0	0	0	0	0	7.99297e-05	0	0	0
OTU_3304	3304	Proteobacteria	Deltaproteobacteria	Oligoflexales				0	0	0	0	0	0	0	0	0	0	0	0	0	0	0	0	0	0	0	0	0	0	0	0	0	0	0	0	0	0	0	0	0	0	0	0	0	0	0	0	0	0
OTU_1776	1776	Bacteroidetes	Sphingobacteriia	Sphingobacteriales	Saprospiraceae			0	0	0	0	0	0	0	0	0	0	0	0	0	0	0	0	0	0	0	0	0	0	0	0	0	0	0	0	0	0	0	0	0	0	0	0	0	0	0	0	0	0
OTU_1910	1910	Proteobacteria	Deltaproteobacteria	Bdellovibrionales	Bdellovibrionaceae	Bdellovibrio		0	0	0	0	0	0	0	0	0	0	0	0	0	0	0	0	0	0	0	0	0	0	0	0	0	0	0	0	0	0	0	0	0	0	0	0	0	0	0.000159859	0	0	0
OTU_2096	2096	TM6						0	0	0	0	0	0	0	0	0	0	0	0	0	0	0	0	0	0	0	0	0	0	0	0	0	0	0	0	0	0	0	0	0	0	0	0	0	0	0	0	0	0
OTU_1889	1889	Proteobacteria	Deltaproteobacteria	Bdellovibrionales	Bacteriovoracaceae			0	0	0	0	0	0	0	0	0	0	0	0	0	0	0	0	0	0	0	0	0	0	0	0	0	0	0	0	0	0	0	0	0	0	0	0	0	0	0	0	0	0
OTU_2265	2265							0	0	0	0	0	0	0	0	0	0	0	0	0	0	0	0	0	0	0	0	0	0	0	0	0	0	0	0	0	0	0	0	0	0	0	0	0	0	0	0	0	0
OTU_2981	2981	Gemmatimonadetes	unidentified_Gemmatimonadetes	AT425-EubC11_terrestrial_group				0	0	0	0	0	0	0	0	0	0	0	0	0	0	0	0	0	0	0	0	0	0	0	0	0	0	0	0	0	0	0	0	0	0	0	0	0	0	0	0	0	0
OTU_3029	3029	Bacteroidetes	Cytophagia	Cytophagales	Cytophagaceae	Hymenobacter	Hymenobacter_sp._THG-a17	0	0	0	0	0	0	0	0	0	0	0	0	0	0	0	0	0	0	0	0	0	0	0	7.99297e-05	0	0	0	0	0	0	0	0	0	0	0	0	0	0	0	0	7.99297e-05	0
OTU_2251	2251	Proteobacteria	Gammaproteobacteria	Cellvibrionales	Porticoccaceae	C1-B045		0	0	0	0	0	0	0	0	0	0	0	0	0	0	0	0	0	0	0	0	0	0	0	0	0	0	0	0	0	0	0	0	0	0	0	0	0	0	0	0	0	0
OTU_2875	2875							0	0	0	0	0	0	0	0	0	0	0	0	0	0	0	0	0	0	0	0	0	0	0	0	0	0	0	0	0	0	0	0	0	0	0	0	0	0	0	0	0	0
OTU_2352	2352	Gemmatimonadetes	unidentified_Gemmatimonadetes	Gemmatimonadales	Gemmatimonadaceae			0	0	0	0	0	0	0	0	0	0	0	0	0	0	0	0	0	0	0	0	0	0	0	0	0	0	0	0	0	0	0	0	0	0	0	0	0	0	0	0	0	0
OTU_2472	2472	Proteobacteria	Deltaproteobacteria					0	0	0	0	0	0	0	0	0	0	0	0	0	0	0	0	0	0	0	0	0	0	0	0	0	0	0	0	0	0	0	0	0	0	0	0	0	0	0	0	0	0
OTU_3122	3122	Proteobacteria	Alphaproteobacteria					0	0	0	0	0	0	0	0	0	0	0	0	0	0	0	0	0	0	0	0	0	0	0	0	0	0	0	0	0	0	0	0	0	0	0	0	0	0	0	0	0	0
OTU_3436	3436	Bacteroidetes	Cytophagia	Order_II	Rhodothermaceae			0	0	0	0	0	0	0	0	0	0	0	0	0	0	0	0	0	0	0	0	0	0	0	0	0	0	0	0	0	0	0	0	0	0	0	0	0	0	0	0	0	0
OTU_3396	3396	Proteobacteria	Gammaproteobacteria	Pseudomonadales	Pseudomonadaceae	Pseudomonas		0	0	0	0	0.000159859	0.00287747	0	0	0	0.000559508	0.076173	0.00263768	0.000399648	0.000639437	0.0043162	0.000319719	0.0064743	0.000319719	0.000239789	0.000399648	0.000239789	0.00103909	7.99297e-05	0.00207817	0.00143873	0.00103909	0.000959156	0.00223803	0.0043162	0.330829	0.000559508	0.00487571	0.00967149	0.0155863	0.000559508	0.000959156	0.000319719	0.00151866	0	0	0.000159859	0.000159859
OTU_24	24	Firmicutes	Bacilli	Bacillales	Bacillaceae	Bacillus		0	0	0	0.00191831	0.00623451	0	0.00255775	0.00143873	0	0.00191831	0.0805691	0.0694589	0.0611462	0.00911198	0.00415634	0.00631444	7.99297e-05	0.0132683	0.00335705	7.99297e-05	0.00119894	0.000399648	0	0.000399648	0.000399648	0.000319719	0.00183838	7.99297e-05	0.000399648	0	0	7.99297e-05	0	0	0	0	0.000239789	0.000319719	0.000959156	0.000879226	0.00159859	0.000799297
OTU_34	34	Proteobacteria	Alphaproteobacteria	Sphingomonadales	Sphingomonadaceae	Sphingobium		0.0021581	0.0212613	0.00639437	0.00351691	0.0051155	0	0.000639437	0	0	0	0.000399648	0.000719367	0.000639437	0.000319719	0.000319719	0.000399648	7.99297e-05	7.99297e-05	0.000239789	0.00871233	0.00487571	0.00335705	0.00735353	0.00575494	0.0189433	0.00279754	0.0072736	0.00951163	0.00479578	0.000559508	0.00591479	0.00279754	0.00223803	0.000319719	0.00119894	7.99297e-05	0.000159859	0.000719367	0.00935177	0.00575494	0.000479578	0.0115099
OTU_1724	1724	Proteobacteria	Betaproteobacteria	SC-I-84				0	0	0	0	0	0	0	0	0	0	0	0.00159859	7.99297e-05	0	7.99297e-05	0	0	0	0	0	0	0	0	0	0	0	7.99297e-05	7.99297e-05	0	0	0	0	0	0	0	0	0	7.99297e-05	0.00439613	0.00255775	0.00255775	0.00463592
OTU_76	76	Proteobacteria	Alphaproteobacteria	Sphingomonadales	Sphingomonadaceae	Sphingomonas	Sphingomonas_yabuuchiae	0	0	0	0	0	0	0	0	0.000959156	0	0.000559508	0.000159859	0.000239789	0	7.99297e-05	0.000479578	0	0.000159859	0	0.00151866	0.00319719	0.000239789	0.0129486	0.0180641	0.000799297	0.00255775	0.000879226	0.000239789	0.000319719	0.000159859	0	0.000639437	0.000159859	7.99297e-05	7.99297e-05	0	0.000639437	0	0.000239789	0.000159859	0	0.000719367
OTU_79	79	Actinobacteria	unidentified_Actinobacteria	Micrococcales	Microbacteriaceae	Rathayibacter		0	0	0	0	0	0.000159859	0.000399648	0	0.00183838	0.00303733	7.99297e-05	0.000879226	0.00303733	0	0.000959156	0.00759332	0.000799297	0.00791304	0.000319719	0.000159859	7.99297e-05	7.99297e-05	0	0.000159859	0.000319719	0.000239789	0	0	0.000159859	0.000159859	0.000159859	0.000159859	0.000159859	0	0.000159859	0	0.000239789	7.99297e-05	0.00223803	0.00111902	0.000559508	0.000399648
OTU_52	52	Proteobacteria						0	0	0	0	0	0	0	0	0	0	0	0	0	0	0.000719367	0	0	0	0	0.000239789	0	0	0	0.000239789	0.000159859	0.000319719	0.000159859	0.000319719	0.000239789	0	7.99297e-05	0	0.000399648	0.0385261	0	0.000159859	0	0	0	0	7.99297e-05	0
OTU_89	89	Proteobacteria	Alphaproteobacteria	Rhizobiales	Bradyrhizobiaceae	Rhodopseudomonas		0	0	0	0	0	0	0.00359683	0	0	0	0	0.0217409	0.000239789	0.000159859	0.00423627	0	0.000159859	7.99297e-05	0.00159859	0.00167852	0.00239789	7.99297e-05	0.000159859	0	0.00143873	0.000799297	0.000719367	0.000319719	0	0	0	0.000239789	0.000799297	0.000159859	0.000319719	0	0	7.99297e-05	0.000319719	0.000399648	7.99297e-05	0.000239789
OTU_131	131	Actinobacteria	unidentified_Actinobacteria	Micrococcales	Micrococcaceae	Arthrobacter		0	0	0	0	0	0	0	0	0	0	0	0.000559508	0.000719367	0	0	0.00199824	0	0	0	0	7.99297e-05	0	0	0	7.99297e-05	0.000319719	0	7.99297e-05	0	0	0	0	0	0	0	0	0	0.0236592	7.99297e-05	0	0	0.000239789
OTU_3813	3813	Actinobacteria	unidentified_Actinobacteria	Micrococcales	Micrococcaceae	Arthrobacter	Arthrobacter_pascens	0	0	0	0	0	0	0.000639437	0	0	0	0.00279754	0	0	0	0	0	0	7.99297e-05	0	0	0	0	0	0	0	0	0	0	7.99297e-05	0	7.99297e-05	0	0	0	0	0	0	7.99297e-05	0.00167852	0.000959156	0.00231796	0.000639437
OTU_3542	3542	Proteobacteria	Alphaproteobacteria	Rhizobiales	Rhizobiaceae	Rhizobium		0	0	0	0	0	0	0	0	0	0	7.99297e-05	7.99297e-05	0	0	0	0	7.99297e-05	7.99297e-05	0	0.000639437	0.000239789	7.99297e-05	0	0.000159859	0.00167852	0.00103909	7.99297e-05	0.000559508	0.000559508	0.00343698	0.00311726	0.00159859	0.000559508	0.000799297	0.000399648	0	0	0.00519543	0.000319719	0.000159859	0.000239789	0.000399648
OTU_1048	1048	Proteobacteria	Alphaproteobacteria	Rhizobiales	Xanthobacteraceae	Variibacter		0	0	0	0	0.00575494	0	0	0	0	0	0	0	0.000159859	0	0.000159859	0	0	0	0	0	0	0	0	7.99297e-05	0	7.99297e-05	0	7.99297e-05	0	0	0	0	0	0	0	0	0	7.99297e-05	0.00183838	0.00167852	0.00143873	0.00119894
OTU_291	291	Actinobacteria	unidentified_Actinobacteria	Propionibacteriales	Nocardioidaceae	Marmoricola	Marmoricola_aurantiacus	0	0	0	0	0	0	0	0.00175845	0.000559508	0	0	7.99297e-05	7.99297e-05	0	7.99297e-05	0	0.00191831	0	0.000159859	0	0	0	0	0	7.99297e-05	0	7.99297e-05	7.99297e-05	7.99297e-05	7.99297e-05	0	0	7.99297e-05	0	0	0	0	0	0.00143873	0.00111902	0.000799297	0.000639437
OTU_2460	2460	Actinobacteria	unidentified_Actinobacteria	Micrococcales	Sanguibacteraceae	Sanguibacter		0	0	0	0	0.000239789	7.99297e-05	7.99297e-05	0.000319719	0	0.0173447	0	0.000159859	0	0	0	0	0	0	0	0	0	7.99297e-05	0	7.99297e-05	0	0	0	0	7.99297e-05	0	0.000159859	0.000239789	0.000159859	7.99297e-05	0.000479578	0.000159859	0	0.00207817	0	0	0.000159859	0
OTU_233	233	Proteobacteria	Alphaproteobacteria	Rhizobiales	Bradyrhizobiaceae	Afipia		0	0	0	0	0	0	0	0.00247782	0	0	0	0.00303733	0.000719367	0.000399648	0.000719367	0.00423627	7.99297e-05	0.00335705	0.000559508	0	0	0	7.99297e-05	0	0.000159859	0	0	7.99297e-05	0	0	0	0.000239789	0.000479578	0	7.99297e-05	0	0	7.99297e-05	0.000159859	0	0	7.99297e-05
OTU_1136	1136	Actinobacteria	unidentified_Actinobacteria	Micrococcales	Intrasporangiaceae	Aquipuribacter		0	0	0	0	0	0	0	0.0112701	0	0	0	0	0	0	0	0	0.00311726	0.000319719	0	0	0	0	0	0	0	0	0	0	0	0	0	0.000319719	0	0	0	0	0	0	0.000239789	0	0	0
OTU_102	102	Proteobacteria	Alphaproteobacteria	Rhodospirillales	Acetobacteraceae	Roseomonas		0	0	0	0	0	0	0	0	0	0	0	0.000239789	7.99297e-05	0	7.99297e-05	7.99297e-05	0.0155863	0	0	0	0	0	0	0	0	0	0	0	0	0.000159859	0	0	0	0	0	0	0	0	0.000639437	0.000319719	0	0.000319719
OTU_722	722	Actinobacteria	unidentified_Actinobacteria	Corynebacteriales	Mycobacteriaceae	Mycobacterium		0	0	0	0	0	0	0	0	0.000959156	0	0	0	0.00279754	7.99297e-05	0	0	0	0	0	0	0	7.99297e-05	0	0	0.000159859	7.99297e-05	0.00183838	0.000399648	0	0	0.000159859	0.000159859	0	0.000239789	0	0	0	0	0.000719367	0.000959156	0.000639437	0.000399648
OTU_311	311	Proteobacteria	Betaproteobacteria	SC-I-84				0	0	0	0	0	0	0	0	0	0	0	0	0	0	0	0	0	0	0	0	0	7.99297e-05	0	0	0	0	0	0	0	0	0	0	0	0	0	0	0	0	0.000319719	0.000559508	0.000159859	0.00231796
OTU_323	323	Actinobacteria	Thermoleophilia	Gaiellales	Gaiellaceae	Gaiella		0	0	0	0	0	0	0	0	0	0	0	0.000159859	7.99297e-05	0	0.000479578	0	0	7.99297e-05	0	0	0	0	0	0	0	0	0	0.000159859	0	0	0	0	0	0	0	0	0	7.99297e-05	0.00167852	0.00143873	0.0013588	0.000879226
OTU_269	269	Actinobacteria	Acidimicrobiia	Acidimicrobiales	Iamiaceae	Iamia		0	0	0	0	0	0	0	0	0	0	0	7.99297e-05	0	0.000479578	7.99297e-05	0	0	0	0	0	0	0	0	0	0	7.99297e-05	0	0	0	0	0	0.000159859	0	0	0	0	0	0	0.000879226	0.00103909	0.00119894	0.000719367
OTU_461	461	Proteobacteria	Betaproteobacteria	Nitrosomonadales	Nitrosomonadaceae			0	0	0	0	0	0	0	0	0	0	0	0	7.99297e-05	0	0	0	0	0	0	0	0	0	0	0	0	7.99297e-05	0	0	7.99297e-05	0	0	0	0	0	0	0	0	0	0.000959156	0.000479578	0.00255775	0.00127887
OTU_1287	1287	Proteobacteria	Betaproteobacteria	Nitrosomonadales	Nitrosomonadaceae			0	0	0	0	0	0	0	0	0	0	0	0	0	0	7.99297e-05	0	0	0	0	0	0	0	0	0	0	0	0.000159859	0	0	0	0	0	0	0	0	0	7.99297e-05	7.99297e-05	0.00127887	0.00103909	0.00119894	0.00167852
OTU_314	314	Proteobacteria	Alphaproteobacteria	Rhodospirillales	Acetobacteraceae	Roseomonas		0	0	0	0	0	0	0	0	0.000719367	0	0	0.000159859	7.99297e-05	0	0	0.00111902	7.99297e-05	0	0	0	0.000319719	0	0	0	0	0	0.000159859	0.000479578	0	0	0	0	0	0	0	0	7.99297e-05	7.99297e-05	0.00127887	0.000559508	0.000239789	0.000639437
OTU_340	340	Actinobacteria	MB-A2-108					0	0	0	0	0	0	0	0	0	0	0	0	7.99297e-05	0	0	0	0	7.99297e-05	0	0	0	0	0	0	0	7.99297e-05	0	7.99297e-05	0	0	0	0	7.99297e-05	0	0	0	0	7.99297e-05	0.000639437	0.000959156	0.000559508	0.000879226
OTU_410	410	Actinobacteria	unidentified_Actinobacteria	Micrococcales	Microbacteriaceae	Agrococcus		0	0	0	0	0	0	0	0.00719367	7.99297e-05	0	0	0	7.99297e-05	0	0	7.99297e-05	0	0	0	0	0.000319719	0	0	0	0	0.000159859	0	0	0	0	0	0	0	0	0	0	0	0	0	0.000239789	7.99297e-05	7.99297e-05
OTU_4270	4270	Proteobacteria	Alphaproteobacteria	Rhizobiales	Methylobacteriaceae	Microvirga		0	0	0	0	0	0	0	0	0	0	0	7.99297e-05	0	0	0	0	0	0	0	0	0	0	0	0	0	7.99297e-05	0	0.000159859	0	0	0	0	0	0	0	0	7.99297e-05	7.99297e-05	0.000239789	0.000639437	0.000719367	0.000319719
OTU_3688	3688	Actinobacteria	unidentified_Actinobacteria	Propionibacteriales	Nocardioidaceae	Marmoricola		0	0	0.00855247	0	0	0	0	0	0.000559508	0	0	0	0	0	0	0	0	0	0	0	0	0	0	0	0	0	0	0	0	0	0	0	0	0	0	0	0	0	0.000159859	0.000319719	0.000159859	7.99297e-05
OTU_2939	2939	Actinobacteria	unidentified_Actinobacteria	Pseudonocardiales	Pseudonocardiaceae	Pseudonocardia		0	0	0	0	0	0	0	0	0	0	0	0	0	7.99297e-05	0	7.99297e-05	0	0	0	0	0.000159859	0	0	0	0	0	0	7.99297e-05	7.99297e-05	0	0	0	0.000399648	0	0	0	0	0	0.000559508	0.000479578	0.000319719	0.000319719
OTU_324	324	Proteobacteria	Alphaproteobacteria	Rhodobacterales	Rhodobacteraceae	Rubellimicrobium		0	0	0	0.00639437	0	0	0	0	0.000239789	0	0	0	0	0	7.99297e-05	0.00119894	0.00247782	0	0	0	0	0	0	0	0	0	0	7.99297e-05	0	0	0	0	0	0	0	0	0	0	0	0	0	0
OTU_245	245	Proteobacteria	Alphaproteobacteria	Rhizobiales	Xanthobacteraceae	Pseudolabrys		0	0	0	0	0	0	0	0	0	0	0	0	0	0	0	0	0	0	0.000159859	0	0	0	0	0	0	0.000159859	0	0	0	0	0	0	0	0	0	0	0	0	0.000799297	0.000879226	0.000799297	0.000719367
OTU_1124	1124	Proteobacteria	Alphaproteobacteria	Rhizobiales	Methylobacteriaceae	Methylobacterium		0	0	0	0	0	0	0	0	0.00407641	0	0	0.00151866	0.000239789	0	0	0	0	0	0	0.000319719	7.99297e-05	0	0	0	0.000959156	7.99297e-05	0	0	0.000239789	0	0.000399648	0	0.000559508	0.000239789	0	0	0	0	0.000159859	0.000239789	0	0
OTU_370	370	Actinobacteria	Thermoleophilia	Gaiellales	Gaiellaceae	Gaiella		0	0	0	0	0	0	0	0	0	0	0	0	7.99297e-05	0	7.99297e-05	0	0	0	0	0	0	0	0	0	0	7.99297e-05	0	7.99297e-05	0	0	0	0	0	0	0	0	0	7.99297e-05	0.000559508	0.000399648	0.000399648	0.000319719
OTU_177	177	Proteobacteria	Gammaproteobacteria	Acidithiobacillales	KCM-B-112			0	0	0	0	0	0	0	0	0	0	0	0	0	0	0	0	0	0	0	0	0	0	0	0	0.000159859	0	0	0	0	0	0	0	0	0	0	0	0	0	0	0	0	0
OTU_310	310	Proteobacteria	Alphaproteobacteria	Caulobacterales	Caulobacteraceae	Caulobacter	Caulobacter_sp.	0	0	0	0	0	0	0.000159859	0.0013588	0	0	0	0.00287747	0	0	0.000959156	0	0	0.000159859	0.000319719	0	0.000159859	0	0.000239789	0.000399648	0.000159859	0	0	0.000239789	0.000239789	0	0	7.99297e-05	0.000319719	0.000239789	0	0	0	0	0	0.000159859	0.000159859	0.000159859
OTU_1359	1359	Proteobacteria	Alphaproteobacteria	Rhizobiales				0	0	0	0	0	0	0	0	0	0	0	0	0	0	0	0	0	7.99297e-05	0	0	0	0	0	0	7.99297e-05	0	7.99297e-05	0	0	0	0	0	0	0	0	0	0	0	0.000319719	0.000719367	0.000639437	0.000319719
OTU_570	570	Proteobacteria	Deltaproteobacteria	GR-WP33-30				0	0	0	0	0	0	0	0	0	0	0	0	0.000319719	0	0	0	0	0	0	0	0	0	0	0	0	7.99297e-05	0	7.99297e-05	0	0	0	0	0	0	0	0	0	0	0.000959156	0.00103909	0.00127887	0.00111902
OTU_3741	3741	Proteobacteria	Betaproteobacteria	Nitrosomonadales	Nitrosomonadaceae			0	0	0	0	0	0	0	0	0	0	0	0	0	0	0	0	0	0	0	0	0	0	0	0	0	0.000159859	0	0	0	0	0	0	0	0	0	0	0	0	0.000639437	0.000159859	0.00119894	0.000879226
OTU_336	336	Proteobacteria	Alphaproteobacteria	Sphingomonadales	Ellin6055			0	0	0	0	0	0	0	0	0	0	0	0	0	0	0	0	0	0	0	0	0	0	0	0	0	7.99297e-05	0	0	0	0	0	0	7.99297e-05	0	0	0	0	0	7.99297e-05	0.000239789	7.99297e-05	0.000399648
OTU_1140	1140	Bacteroidetes	Flavobacteriia	Flavobacteriales	Flavobacteriaceae			0	0	0	0	0	0	0	0	0	0	0	0	0	0	7.99297e-05	0	0	0	0	0	0.000159859	0	0	0	0.000159859	0.00191831	0.000559508	0.000879226	0	0	0.000159859	0.000239789	0.00151866	0	0.000879226	0	0.000239789	0	7.99297e-05	7.99297e-05	7.99297e-05	0
OTU_293	293	Proteobacteria	Alphaproteobacteria	Rhodospirillales	Acetobacteraceae	Roseomonas		0	0	0	0	0	0	0	0	0	0	0	0.00519543	0.000639437	0	0	0	0	0	0	0	0	0	0	0	7.99297e-05	0	0	0	0	0	0	0	7.99297e-05	0	0	0	0	0	0	0	7.99297e-05	0
OTU_619	619	Proteobacteria	Alphaproteobacteria	Rhizobiales	Phyllobacteriaceae	Mesorhizobium		0	0	0	0	0	0	0	0	0	0	0	0	7.99297e-05	0	7.99297e-05	0	0	0	0	0	0	0	0	0	0	7.99297e-05	0	7.99297e-05	0	0	0	0	0	0	0	0.000159859	0	0	0.000319719	0.000559508	0.000879226	0.000399648
OTU_1341	1341	Actinobacteria	unidentified_Actinobacteria	Pseudonocardiales	Pseudonocardiaceae	Pseudonocardia		0	0	0	0	0	0	0	0	0	0	0	0	0	0	0	0	0	0	0	0	7.99297e-05	0	0	0	0	0	0	0	0	0	0	0	0	0	0	0	0	0	0.000399648	0.000719367	0.000319719	0.000399648
OTU_312	312	Firmicutes	Erysipelotrichia	Erysipelotrichales	Erysipelotrichaceae	Turicibacter		0	0	0	0	0.00671409	0	0	0	0	0	0	0	0	0	0	0	0	0	0	7.99297e-05	0	0.000159859	0	0	0	0	0	0	0	0	0	0	0	0	0	0	0	0	0	7.99297e-05	0.000239789	0
OTU_1417	1417	Verrucomicrobia	OPB35_soil_group					0	0	0	0	0	0	0	0	0	0	0	0.000159859	0	0	0	0	0	0	0	0	0	0	0	0	0	0	0	0	0	0	0	0	0	0	0	0	7.99297e-05	0	0.000479578	0.00119894	7.99297e-05	0.000479578
OTU_582	582	Proteobacteria	Alphaproteobacteria	Rhizobiales	Neo-b11			0	0	0	0	0	0	0	0	0	0	0	0	0	0	7.99297e-05	0	0	0	0	0	0	0	0	0	0	0	0.00103909	0	0	0	0	0	0	0.000239789	0	0	0	0	0.000319719	0.000239789	0.000319719	0.000239789
OTU_1412	1412	Proteobacteria	Gammaproteobacteria	Xanthomonadales	Xanthomonadaceae			0	0	0	0	0	0	0	0	0	0	0	0	0	0	0	0	0	0	0	0	0	7.99297e-05	0	0	0.000159859	0	0	0	0	0	0	0	0	0	0	0	0	0	0.000159859	0.000159859	0.000479578	0.000319719
OTU_2025	2025	Proteobacteria	Alphaproteobacteria	Rhodospirillales	Acetobacteraceae	Roseomonas		0	0	0	0	0	0	0	0	0	0	0	0	0	0	0	0	0	0	0	0	0	0	0	0	0	0	0	7.99297e-05	0	0	0	0	0	0	0	0	0	0	0.000239789	0.000159859	0.000559508	0.000239789
OTU_625	625	Proteobacteria	Alphaproteobacteria	Rhodospirillales	Rhodospirillaceae	Skermanella		0	0	0	0	0	0	0	0	0	0	0	0	7.99297e-05	0	0	0	0	0	0	0	0	0	0	0	7.99297e-05	0.000399648	0	7.99297e-05	0	0	0	0	0	0	0	0	0	0	0.000239789	0.000319719	0.000159859	7.99297e-05
OTU_348	348	Actinobacteria	Thermoleophilia	Solirubrobacterales				0	0	0	0	0	0	0	0	0	0	0	0	0	0	0	0	0	0	0	0	0	0	0	0	7.99297e-05	0	0	0	0	0.000239789	7.99297e-05	7.99297e-05	0	0	0	0	0	0	0.000319719	0.000239789	0.000239789	0.000239789
OTU_285	285	Proteobacteria	Deltaproteobacteria	Myxococcales	Sandaracinaceae			0	0	0	0	0	0	0	0	0	0	0	0	0	0	0	0	0	0	0	0	0	0	0	0	0	0	0	0	0	0	7.99297e-05	0	0.000159859	0	0	0	0	0	0.000239789	0.000159859	0.000239789	0.000159859
OTU_626	626	Proteobacteria	Alphaproteobacteria	Sphingomonadales	Sphingomonadaceae	Sphingomonas		0	0	0	7.99297e-05	0	0	0	0	0.000239789	0	0	0.000159859	0	0	0.000159859	0	0	7.99297e-05	0	0	0	0	0	0	0	0	0	0	0	0	0	0	0	0	0	0	7.99297e-05	0	0.000639437	0.000319719	7.99297e-05	0.000239789
OTU_3192	3192	Actinobacteria	unidentified_Actinobacteria	Micrococcales	Bogoriellaceae	Georgenia	Georgenia_muralis	0	0	0	0	0	0	0	0	0	0	0	0.000239789	0	0	7.99297e-05	0	0	0	0	0	0	0	0	0	0	0	0	0	0	0	0	0	0	0	0	0	0	0.00639437	0	0	0	0
OTU_426	426	Proteobacteria	Deltaproteobacteria	Myxococcales	Haliangiaceae	Haliangium		0	0	0	0	0	0	0	0	0	0	0	0	0	0	0	0	0	7.99297e-05	0	0	0.000159859	7.99297e-05	0	0	0	0	0	0	0.000239789	0	7.99297e-05	0.000159859	0	7.99297e-05	7.99297e-05	0	0	0	0.000479578	0.000239789	0.000159859	0.000399648
OTU_2417	2417	Bacteroidetes	Sphingobacteriia	Sphingobacteriales	AKYH767			0	0	0	0	0	0	0	0	0	0	0	0	7.99297e-05	7.99297e-05	0.000159859	0	0	0	0	0	0	0	0	0	0	7.99297e-05	0	7.99297e-05	0	0	0	0	7.99297e-05	0	0	0	7.99297e-05	7.99297e-05	0.000399648	0.000399648	0.000559508	0.000719367
OTU_949	949	Bacteroidetes	Sphingobacteriia	Sphingobacteriales	Saprospiraceae			0	0	0	0	0	0	0	0	0	0	0	0	0	0	0	0	0	0	0	0	0	0	0	7.99297e-05	0	0	0	0	0	0	0	0	0	0	0	0	0	0	0.000319719	0.000239789	0.000159859	0.000399648
OTU_3172	3172	Proteobacteria	Alphaproteobacteria	Rhizobiales	Hyphomicrobiaceae			0	0	0	0	0	0	0	0	0	0	0	0	0	0	0	0	0	0	0	0	0	0	0	0	0	0	0	0	0	0	0	0	0	0	0	0	0	0	0.000239789	7.99297e-05	7.99297e-05	0.00111902
OTU_759	759	Proteobacteria	Betaproteobacteria	Burkholderiales	Alcaligenaceae			0	0	0	0	0	0.00151866	0	0	0	0	0	0	0	7.99297e-05	0	0	0	0	0	0.000399648	0	0.000159859	0	7.99297e-05	0.00111902	0	0.00111902	0	7.99297e-05	0	0	0.000159859	0.00111902	0	0	0	0	0	0	0	7.99297e-05	0
OTU_345	345	Proteobacteria	Alphaproteobacteria	Rhodobacterales	Rhodobacteraceae	Amaricoccus		0	0	0	0	0	0	0	0	0	0	0	0	0	0	0	0	0	0	0	0	0	0	0	0	0	0.000719367	0.000159859	0	7.99297e-05	0	0	0	0	0	0.000159859	0	0	0	0	7.99297e-05	0	0
OTU_725	725	Verrucomicrobia	OPB35_soil_group					0	0	0	0	0	0	0.0013588	0	0	0	0	0	0	0	0	0	0	0	0	0	0	0	0	0	0	0.000159859	0	0	0	0	0	0	0	0	0	0	0	0	0.000479578	0.000399648	0.000239789	0.000319719
OTU_394	394	Actinobacteria	Thermoleophilia	Solirubrobacterales	0319-6M6			0	0	0	0	0	0	0	0	0	0	0	0	0	0	0	0	0.000159859	0	0	0	0	0	0	0	0	0	0	0	0	0.0013588	0	7.99297e-05	0	0	0	0	0	7.99297e-05	7.99297e-05	0.000239789	7.99297e-05	0.000399648
OTU_774	774	Actinobacteria	unidentified_Actinobacteria	Frankiales	Cryptosporangiaceae	Fodinicola		0	0	0	0	0	0	0	0	0	0	0	0	0	0	7.99297e-05	0	0	0	0	0	0	0	0	0	0	0	0	0	0	0	0	0	0	0	0	0	0	0	7.99297e-05	7.99297e-05	0.000479578	0.000159859
OTU_508	508	Proteobacteria	Alphaproteobacteria	Rhizobiales	alphaI_cluster			0	0	0	0	0	0	0	0	0	0	0	0	7.99297e-05	0	0	0	0	0	0	0	0	0	0	0	7.99297e-05	0	0	0	0	0	0	0	7.99297e-05	0	0	0	0	0	0.000479578	0.000159859	0.000159859	0.000159859
OTU_289	289	Chlorobi	Chlorobia	Chlorobiales	OPB56			0	0	0	0	0	0	0	0	0	0	0	0	0	0	0	0	0	0	0	0	0	0	0	0	0	7.99297e-05	0	0	0	0	0	0	0	0	0	0	0	0	0.000239789	0.000479578	0.000319719	0.000559508
OTU_354	354	Actinobacteria	Acidimicrobiia	Acidimicrobiales				0	0	0	0	0	0	0	0	0	0	0	0	0	0	0	0	0	0	0	7.99297e-05	0.000479578	0	0	0	0	0	0	0	0	0	0	0	0	0	0	0	0	7.99297e-05	0.000239789	7.99297e-05	0.000399648	0
OTU_416	416	Proteobacteria	Deltaproteobacteria	Bdellovibrionales	Bdellovibrionaceae	Bdellovibrio		0	0	0	0	0	0	0	0	0.00127887	0	0	0.000159859	0	0	0	0	0	0	0	0	0	0	0	0	0	0	0	7.99297e-05	0	0	0	0	0	0	0	0	0	0	0.000399648	0.000239789	0.000159859	0.000239789
OTU_799	799	Proteobacteria	Deltaproteobacteria	Myxococcales	Haliangiaceae	Haliangium		0	0	0	0	0	0	0	0	0	0	0	0	0	0	0	7.99297e-05	0	0	0	0	0	0	0	0	0	0	0	0	0	0	0	0	0	0	0	0	0	0	7.99297e-05	7.99297e-05	0	0.000239789
OTU_585	585	Proteobacteria	Gammaproteobacteria	Pseudomonadales	Pseudomonadaceae	Pseudomonas		0	0	0	0	0	0	0	0	0	0	0	0	0	0	0	0	0	0	0	0.000239789	0	7.99297e-05	7.99297e-05	0	0.000399648	0	0	0	7.99297e-05	0.000879226	0.000239789	0.000239789	0	0	0.000639437	0	0	0	0	0	0.000159859	0.000239789
OTU_483	483	Proteobacteria	Deltaproteobacteria	Myxococcales	Sandaracinaceae			0	0	0	0	0	0	0	0	0	0	0	0	0	7.99297e-05	0	0	0	0	0	7.99297e-05	0	0	0	0	0	0	0	0	0	0	0	0	0	0	0	0	0	0	0.000399648	0.000319719	0.000479578	0.000239789
OTU_366	366	Gemmatimonadetes	unidentified_Gemmatimonadetes	Gemmatimonadales	Gemmatimonadaceae			0	0	0	0	0	0	0	0	0	0	0	0	0	0	0	0	0	0	0	0	0	0	0	0	0	0	0	0	0	0	0	0	0	0	0	0	0	0	7.99297e-05	0.000159859	0.000479578	0.000559508
OTU_805	805	Bacteroidetes	Cytophagia	Order_II	Rhodothermaceae	Rubrivirga		0	0	0	0	0	0.00103909	0	0	0	0	0	0	0	0	0	0	0	0	0	0	0	0	0	0	0	0	7.99297e-05	0	0	0	0	0	0	0	0	0	0	0	0	0.000159859	7.99297e-05	0.000239789
OTU_3661	3661	Proteobacteria	Betaproteobacteria	Neisseriales	Neisseriaceae			0	0	0	0	0	0	0	0	0	0	0	0	0	0	0	0	0	0.000159859	0	0	0	0	0	0	0	0	0	0	0	0	7.99297e-05	0	0	0	0	0	0	0	0.000319719	0	0.000559508	0
OTU_517	517	Proteobacteria	Alphaproteobacteria	Rhodobacterales	Rhodobacteraceae	Rubellimicrobium		0	0	0	0	0	0	0	0	0	0	0	0	0	7.99297e-05	7.99297e-05	0	0	0	0	0	0	0	0	0	0	0.000159859	0.00199824	0	0	0	0	0	0	0	0	0	0	0	0	7.99297e-05	0	0
OTU_409	409	Proteobacteria	Alphaproteobacteria	Rhizobiales	Beijerinckiaceae	Methylorosula		0	0	0	0	0	0	0	0	0	0	0	0	0	0	0	0	0	0	0	0	0	0	0	0	0	0	0	0	0	0	0	0	0	0	0	0	7.99297e-05	0	0.000239789	0.000559508	7.99297e-05	0.000319719
OTU_789	789	Chloroflexi	KD4-96					0	0	0	0	0	0	0	0	0	0	0	7.99297e-05	0	0.000239789	0	0	0	0	0	0	0	0	0	7.99297e-05	0	0	0	0	0	0	0	0	0	0	0	0	0	0	0	7.99297e-05	7.99297e-05	0
OTU_379	379	Bacteroidetes	Sphingobacteriia	Sphingobacteriales	PHOS-HE51			0	0	0	0	0	0	0	0	0	0	0	0	0	0	0	7.99297e-05	0	0	0	0	0	0	0	7.99297e-05	0	0	0	7.99297e-05	0	0	0	0	7.99297e-05	0	0	0	0	7.99297e-05	0.000159859	0.000159859	0.000159859	0.000239789
OTU_1123	1123	Proteobacteria	Alphaproteobacteria	Rhizobiales	JG34-KF-361			0	0	0	0	0	0	0	0	0	0	0	0	0	0	0	0	0	0	0	0	0	0	0	0	7.99297e-05	0	0	0	0	0	0	0	0	0	0	0	0	0	0.000319719	0.000319719	0	0.000159859
OTU_562	562	Verrucomicrobia	OPB35_soil_group					0	0	0	0	0	0	0	0	0	0	0	0	0	0	0	0	0	0	0	0	0	0	0	7.99297e-05	0	0	0	0	0	0	0	0	7.99297e-05	0	0	0	0	0	7.99297e-05	0.000319719	0.000239789	0.000159859
OTU_1971	1971	Proteobacteria	Alphaproteobacteria	Rhodospirillales	Rhodospirillaceae	Dongia		0	0	0	0	0	0	0	0	0	0	0	7.99297e-05	0	0	0	0	0	0	0	0	0.000319719	0	0	7.99297e-05	0	0	0	0.000399648	0.000239789	0	0	0.000159859	0	0	0	0	0	0	0	7.99297e-05	0.000719367	0.000479578
OTU_540	540	Proteobacteria	Gammaproteobacteria					0	0	0	0	0	0	0	0	0	0	0	0	0	0	0.000799297	0	0	0	0	0	0	0	0	0	0	7.99297e-05	0	0	0	0	7.99297e-05	0	0	0	0	0	0	7.99297e-05	0.000159859	0	0	0
OTU_910	910	Proteobacteria	Deltaproteobacteria	Myxococcales	mle1-27			0	0	0	0	0	0	0	0	0	0	0	0	0	0	0	0	0	0	0	0	0	0	0	0	0	0	0	0	0	0	0.000159859	0	0	0	0	0	0	0	0.000639437	0.000319719	0.000319719	0.000319719
OTU_4601	4601	Proteobacteria	Deltaproteobacteria	Myxococcales	Haliangiaceae	Haliangium		0	0	0	0	0	0	0	0	0	0	0	0	0	0	0	0	0	0	0	0	0	0	0	7.99297e-05	0	7.99297e-05	0	0	7.99297e-05	0	0	0	0	0	0	0	0	7.99297e-05	0.000159859	0.000399648	0.000159859	0.000239789
OTU_2210	2210	Actinobacteria	unidentified_Actinobacteria	Micrococcales	Cellulomonadaceae	Cellulomonas		0	0	0	0	0	0	0	7.99297e-05	0	0	0	0	0	0	0	0	0.000319719	0	0	0	0	0	0	0	0	0	0	0	0	0	0	0	0	0	0	0	0	0.000159859	0.000159859	0.000159859	0.000239789	7.99297e-05
OTU_467	467	Proteobacteria	Gammaproteobacteria	Xanthomonadales	Xanthomonadaceae			0	0	0	0	0	0	0	0	0	0	0	0	0	0	0	0	0	0	0	0	0	0	0	0	0	7.99297e-05	0.000159859	0	0	0	0	0	0	0	0	0	0	0	0	0	0	7.99297e-05
OTU_4300	4300	Proteobacteria	Betaproteobacteria	Burkholderiales	Oxalobacteraceae			0	0	0	0	0	0	0	0	7.99297e-05	0	0	0	0	7.99297e-05	0	0	0	0	0	0	0	0.000159859	0	0	0	0	0	0	7.99297e-05	0	0	0	0	0	0	7.99297e-05	7.99297e-05	0	0.000319719	7.99297e-05	7.99297e-05	7.99297e-05
OTU_2391	2391	Bacteroidetes	Flavobacteriia	Flavobacteriales	Flavobacteriaceae	Chryseobacterium		0.000479578	0.000159859	0.000159859	0	7.99297e-05	0	0.000239789	0	7.99297e-05	0	0	0	0	0	0	0	7.99297e-05	7.99297e-05	0	7.99297e-05	0	0	0.000159859	0.000159859	7.99297e-05	0.000159859	0	0	0	0	0	0	0	7.99297e-05	7.99297e-05	0.000719367	0	0	0	0.000159859	0	0
OTU_3153	3153	Proteobacteria	Alphaproteobacteria	Rhodospirillales	Acetobacteraceae	Roseomonas		0	0	0	0	0	0	0	0	0	0	0	0	0	0	0	0	0	0	0	0	0	0	0	0	0	0	0	0	0	0	0	0	0	0	0	0	0	0	7.99297e-05	0	0.000159859	7.99297e-05
OTU_946	946	Proteobacteria	Gammaproteobacteria	NKB5				0	0	0	0	0	0	0	0	0	0	0	0	0	0	0	0	0	0	0	0	0	0	0	0.000159859	0	0	0	0	0	0	0	7.99297e-05	0	0	0	0	7.99297e-05	0.000159859	0.000159859	0	0	7.99297e-05
OTU_1816	1816	Gemmatimonadetes	unidentified_Gemmatimonadetes	BD2-11_terrestrial_group				0	0	0	0	0	0	0	0	0	0	0	0	0	0	0	0	0	0	0	0	0	0	0	0	0	0	0	0	0	0	0	0	0	0	0	0	0	0	7.99297e-05	0.000319719	0.000239789	0.000159859
OTU_577	577	Proteobacteria	Gammaproteobacteria	NKB5				0	0	0	0	0	0	0	0	0	0	0	0.000399648	0	0	0	0	0	0	0	0	0	0	0	0	7.99297e-05	0	0	0	0	0	0	0	0	0	0	0	0	0	0.000159859	7.99297e-05	7.99297e-05	7.99297e-05
OTU_1014	1014	Proteobacteria	Deltaproteobacteria	Myxococcales	Haliangiaceae	Haliangium		0	0	0	0	0	0	0	0	0	0	0	0	0	0	0.000159859	0	0	0	0	0	0	0	0	0	0	0	0	0	0	0	0	0	0	0	0	0	0	0	0.000239789	0.000159859	0.000159859	0.000319719
OTU_624	624	Proteobacteria	Alphaproteobacteria	Rhodobacterales	Rhodobacteraceae	Amaricoccus		0	0	0	0	0	0	0	0	0	0	0	0	0	0	0	0	0	0	0	0	0	0	0	0	0	0	0	0.000159859	0	0	0	0	0	0	0	0	0	0	0.000159859	0.000239789	0.000159859	7.99297e-05
OTU_891	891	Acidobacteria	Holophagae	Subgroup_7				0	0	0	0	0	0	0	0	0	0	0	0	0	0	0	0	0	0	0	0	0	0	0	0	0	0	0	0	0	0	0	0	0	0	0	0	0	0	0	0.000159859	0	0.000559508
OTU_747	747	Bacteroidetes	Flavobacteriia	Flavobacteriales	Flavobacteriaceae	Flavobacterium		0	0	0	0	0	0	0	0	0	0	0	0	0	0	0	0	0	0	0	0	0	0	0	0	0	7.99297e-05	0	7.99297e-05	0	0	0	0	0	0	0	0	0	0	0.000239789	7.99297e-05	0.000239789	0.000159859
OTU_815	815	Bacteroidetes	Sphingobacteriia	Sphingobacteriales	env.OPS_17			0	0	0	0	0	0	0	0	0	0	0	0	0	0	0	0	0	0	0	0.000159859	0	0	0	0	7.99297e-05	0	0	0	0	0	0	7.99297e-05	7.99297e-05	0	0	0	0	0	0	0.000159859	0	7.99297e-05
OTU_922	922	Bacteroidetes	Sphingobacteriia	Sphingobacteriales	PHOS-HE51			0	0	0	0	0	0	0.00111902	0	0	0	0	0	0	0	0	0	0	0	0	0	0	0	0	0	0	0	0	0	0	0	0	0	0	0	0	0	0	0	0.000319719	0	0.000319719	0.000639437
OTU_1777	1777	Proteobacteria	Alphaproteobacteria	Caulobacterales	Hyphomonadaceae	Woodsholea		0	0	0	0	0	0	0	0	0	0	0	0	0	0	0	0	0	0	0	0	0	0	0	0	0	0	0	0	0	0	0	0	0	0	0	0	0	0	0.000159859	7.99297e-05	0.000239789	0.000159859
OTU_682	682	Proteobacteria	Deltaproteobacteria	Myxococcales	P3OB-42			0	0	0	0	0	0	0	0	0	0	0	0	0	0	0	0	0	0	0	0	0	0	0	0	0	0	0	0	0	0	0	0	0	0	0	0	0	0	7.99297e-05	0.000159859	0	7.99297e-05
OTU_1307	1307	Planctomycetes	vadinHA49					0	0	0	0	0	0	0	0	0	0	0	0	0	7.99297e-05	7.99297e-05	0	0	0	0	0	0	0	0	0	0	0	7.99297e-05	7.99297e-05	7.99297e-05	0	0	0	0	0	0	0	0.000159859	0	0	7.99297e-05	0.000239789	0.000319719
OTU_4251	4251	Gemmatimonadetes	unidentified_Gemmatimonadetes	Gemmatimonadales	Gemmatimonadaceae			0	0	0	0	0	0	0	0	0	0	0	0	0	0	0	0	0	0	0	0	0	0	0	0	0	0	0	0	0	0	0	0	0	0	0	0	0	0	0.000159859	0.000159859	7.99297e-05	0.000239789
OTU_793	793	Proteobacteria	Alphaproteobacteria	Rhizobiales	A0839			0	0	0	0	0	0	0	0	0	0	0	0	0	0	0	0	0	0	0	0	0	0	0	0	0	0	0	0	0	0	0	0	0	0	0	0	0	0	7.99297e-05	0.000159859	0.000239789	0.000479578
OTU_1245	1245	Acidobacteria	unidentified_Acidobacteria	Subgroup_6	unidentified_Acidobacteria	unidentified_Acidobacteria		0	0	0	0	0	0	0	0	0	0	0	0	0	0	0	0	0	0	0	0	0	0	0	0	0	0	0	0	0	0	0	0	0	0	7.99297e-05	0	0	0	0	0	0	0
OTU_3421	3421	Acidobacteria	unidentified_Acidobacteria	Subgroup_6				0	0	0	0	0	0	0	0	0	0	0	0	0	0	0	0	0	0	0	0	0	0	0	0	0	0	0	0	0	0	0	0	0	0	0	0	0	0	7.99297e-05	0	7.99297e-05	0
OTU_755	755	Proteobacteria	Deltaproteobacteria	Myxococcales	Sandaracinaceae			0	0	0	0	0	0	0	0	0	0	0	7.99297e-05	0	0	7.99297e-05	0	0	7.99297e-05	0	0	0	0	0	7.99297e-05	0	0	0	0	0	0	0	0	0	0	0	0	0	0	7.99297e-05	0	0	7.99297e-05
OTU_2382	2382	Verrucomicrobia	OPB35_soil_group					0	0	0	0	0	0	0	0	0	0	0	0	0	0	0	0	0	0	0	0	0	0	0	0	0	0	0	0	0	0	0	0	0	0	0	0	0	0	0.000159859	0.000159859	0.000559508	0.000399648
OTU_1592	1592	Bacteroidetes	Sphingobacteriia	Sphingobacteriales	KD3-93			0	0	0	0	0	0	0	0	0	0	0	0	0	0	0	0	0	0	0	0	0	0	0	0	0	7.99297e-05	0	0	0	0	0	0	0	7.99297e-05	0	0	0	0	0	0.000159859	7.99297e-05	0.000159859
OTU_916	916	Proteobacteria	Deltaproteobacteria	Myxococcales	Polyangiaceae	Sorangium		0	0	0	0	0	0	0	0	0	0	0	0	0	0	0	0	0	0	0	0	0	0	0	0	0	0	0	0	0	0	0	0	0	0	0	0	0	0	0.000559508	0.000319719	0.000159859	0.000559508
OTU_756	756	Planctomycetes	vadinHA49					0	0	0	0	0	0	0	0	0	0	0	0.000159859	0	0	7.99297e-05	0	0	0	0	0	0	0	0	7.99297e-05	0	0	0	7.99297e-05	0	0	0	0	0	0	0	0	0	0	7.99297e-05	0.000159859	0.000239789	0.000239789
OTU_1185	1185	Bacteroidetes	Sphingobacteriia	Sphingobacteriales	Saprospiraceae			0	0	0	0	0	0	0	0	0	0	0	7.99297e-05	0	0	0	0	0	0	0	0	0	0	0	0	0	0	0	0	0	0	0	0	0	0	0	0	0	0	0.000239789	0.000159859	0.000159859	0.000559508
OTU_1314	1314	Proteobacteria	Gammaproteobacteria	Xanthomonadales	Xanthomonadaceae			0	0	0	0	0	0	0	0	0	0	0	0	7.99297e-05	0	0	0	0	0	0	0	0	0	0	0	0	0	0	0	0	0	0	7.99297e-05	0	0	7.99297e-05	7.99297e-05	0	0	0.000159859	0.000239789	0	7.99297e-05
OTU_1246	1246	Proteobacteria	Deltaproteobacteria	Myxococcales	Blfdi19			0	0	0	0	0	0	0	0	0	0	0	0	0	0	0	0	0	0	0	0	0	0	0	0	0	0	0	0	0	0	0	0	0	0	0	0	0	0	0.000239789	0.000159859	7.99297e-05	0.000159859
OTU_834	834	Planctomycetes	Planctomycetacia	Planctomycetales	Planctomycetaceae	Pirellula		0	0	0	0	0	0	0	0	0	0	0	7.99297e-05	7.99297e-05	0	0	0	0	0	0	0	0	0	0	0	0	0	7.99297e-05	7.99297e-05	0	0	0.000319719	0	0	0	0	0	0	7.99297e-05	0	0	7.99297e-05	0
OTU_1528	1528	Gemmatimonadetes	unidentified_Gemmatimonadetes	Gemmatimonadales	Gemmatimonadaceae			0	0	0	0	0	0	0	0	0	0	0	0	0	0	0	0	0	0	0	0	0	0	0	0	0	0	0	0	0	0	0	0	0	0	0	0	0	0	0.000559508	0.000319719	0.000239789	0.000239789
OTU_1896	1896	Proteobacteria	Deltaproteobacteria	Bdellovibrionales	Bdellovibrionaceae			0	0	0	0	0	0	0	0	0	0	0	0	0	0	0	0	0	0	0	0	0	0	0	0	0	0	0	0	0	0	0	0	0	0	0	0	0	0	0.000239789	7.99297e-05	7.99297e-05	0.000159859
OTU_4729	4729	Proteobacteria	Deltaproteobacteria	Bdellovibrionales	Bdellovibrionaceae	Bdellovibrio		0	0	0	0	0	0	0	0	0	0	0	0	0	0	0	0	0	0	0	0	0	0	0	0	0	0	0	0	0	0	0	0	0	0	0	0	0	0	7.99297e-05	7.99297e-05	0.000319719	0.000159859
OTU_3145	3145	Bacteroidetes	Flavobacteriia	Flavobacteriales	NS9_marine_group			0	0	0	0	0	0	0	0	0	0	0	0	7.99297e-05	0	7.99297e-05	0	0	0	0	0	0	0	0	0	0	0	0	0	0	0	0	0	0	0	0	0	0	7.99297e-05	0.000159859	0	0.000239789	0
OTU_758	758	Planctomycetes	vadinHA49					0	0	0	0	0	0	0	0	0	0	0	0	0	0	0	0	0	0	0	0	0	0	0	0	0	0	0	0	0	0	0	0	0.000159859	0	0	0	0.000159859	7.99297e-05	0	7.99297e-05	7.99297e-05	7.99297e-05
OTU_657	657	Actinobacteria	Acidimicrobiia	Acidimicrobiales				0	0	0	0	0	0	0	0	0	0	0	0	0	0	0	0	0	0	0	0	0	0	0	0	0	0	0	0	0	0	0	0	0	7.99297e-05	0	0	0	0	0.000239789	7.99297e-05	0.000159859	7.99297e-05
OTU_803	803	Proteobacteria	Deltaproteobacteria	Myxococcales	Phaselicystidaceae	Phaselicystis		0	0	0	0	0	0	0	0	0	0	0	0	0	7.99297e-05	0	0	0	0	0	0	0	0	0	0	0	0	7.99297e-05	0	0	0	0	0	0	0	0	0	0	0	0.000319719	7.99297e-05	0.000239789	0.000319719
OTU_780	780	Proteobacteria	Alphaproteobacteria	Rhizobiales	Hyphomicrobiaceae	Rhodoplanes		0	0	0	0	0	0	0	0	0	0	0	0	0	0	0	0	0	0	0	0	0	7.99297e-05	0	0	0	0	0	0	0	0	0	0	0	0	0	0	0	0	0	0	0.000239789	7.99297e-05
OTU_806	806	Proteobacteria	Deltaproteobacteria	Bdellovibrionales	Bdellovibrionaceae			0	0	0	0	0	0	0	0	0	0	0	0	0	0	0	0	0	0	0	0	0	0	0	0	0	0	0	0	0	0	0	0	0	0	0	7.99297e-05	7.99297e-05	0	0.000159859	7.99297e-05	0	7.99297e-05
OTU_1103	1103	Verrucomicrobia	Spartobacteria	Chthoniobacterales	Chthoniobacteraceae	Chthoniobacter		0	0	0	0	0	0	0	0	0	0	0	0	0	0	0	0	0	0	0	0	0	0	0	0	0	0	0	0	0	0	0	0	0	0	0	0	0	0	0	0.000159859	0	0
OTU_594	594	Verrucomicrobia	Opitutae	Opitutales	Opitutaceae			0	0	0	0	0	0	0	0	0	0	0	0	0	0	0	0	0	0	0	0	0	0	0	0	0.000159859	0.000319719	0	0	0	0	0	0	0.000319719	0.00151866	0	7.99297e-05	0	0	0	0	0	0
OTU_3666	3666	Acidobacteria	unidentified_Acidobacteria	Subgroup_6				0	0	0	0	0	0	0	0	0	0	0	0	0	7.99297e-05	0	0	0	0	0	0	0	0	0	0	0	0	0	0	0	0	0	0	0	0	0	0	0	0	0	7.99297e-05	0	7.99297e-05
OTU_2568	2568	Acidobacteria	unidentified_Acidobacteria	Subgroup_3	unidentified_Acidobacteria	Bryobacter		0	0	0	0	0	0	0	0	0	0	0	0	0	0	0	0	0	0	0	0	0	0	0	0	0	0	0	0	0	0	0	0	0	0	0	0	0	0	0.000159859	0.000239789	0.000159859	0
OTU_812	812	Proteobacteria	Deltaproteobacteria	Myxococcales	Polyangiaceae	Sorangium		0	0	0	0	0	0	0	0	0	0	0	0.000159859	0.000159859	0	0	0	0	0	0	0	0	0	0	0	0.000319719	0	0	7.99297e-05	0	0	0	0	0	0	0	0	0	0	0.000399648	0.000159859	0	0
OTU_673	673	Proteobacteria	Alphaproteobacteria	Rhizobiales				0	0	0	0	0	0	0	0	0	0	0	0	0	0	0	0	0	0	0	7.99297e-05	0	0	0	0	0	0	7.99297e-05	0	0	0	0	0	0	0	0	0	0	0	0.000239789	0.000239789	0	0
OTU_1000	1000	Proteobacteria						0	0	0	0	0	0	0	0	0	0	0	0	0	0	0	0	0	0	0	0	0	0	0	0	0	0	0	0.000399648	0	0	0	0	0	0	0	0	0	0	0.000159859	0	0.000319719	7.99297e-05
OTU_919	919	Proteobacteria	Alphaproteobacteria	Rhodospirillales	Acetobacteraceae			0	0	0	0	0	0	0	0	0	0	0	0	0	0	0	0	0	0	0	0	0	0	0	0	0	0	0	0	0	0	0	0	0	0	0	0	0	7.99297e-05	0	0	0.000159859	0.000239789
OTU_3516	3516	Proteobacteria	Deltaproteobacteria	Oligoflexales				0	0	0	0	0	0	0	0	0	0	0	0	0	0	0	0	0.000159859	0	0	0.000239789	0	0	0	0	0	0	0	0	0	0	0	0	0	0.000159859	0	7.99297e-05	7.99297e-05	0	0	0	7.99297e-05	0
OTU_870	870	Bacteroidetes	Flavobacteriia	Flavobacteriales	Cryomorphaceae	Crocinitomix		0	0	0	0	0	0	0	0	0	0	0	0	0	0	7.99297e-05	0	0	0	0	0	0	0	0	0	0	0	0	0	0.000239789	0	0	0	0	0	0	0	0	0	0.000159859	0.000639437	0	0
OTU_927	927	Actinobacteria	Thermoleophilia	Solirubrobacterales	480-2			0	0	0	0	0	0	0	0	0	0	0	0	0	0	0	0	0	0	0	0	0	0	0	0	0	0	0	0	0	0	0	0.000159859	0.000239789	0	0	0	0	0	0	0	0	0
OTU_1378	1378	Proteobacteria	Deltaproteobacteria	Myxococcales	KD3-10			0	0	0	0	0	0	0	0	0	0	0	0	0	0	0	0	0	0	0	0	0	0	0	0	0	0	0	0	0	0	0	0	0	0	0	0	0	0	0.000319719	0.000239789	0.000159859	0.000239789
OTU_1666	1666	Actinobacteria	Thermoleophilia	Gaiellales	Gaiellaceae	Gaiella		0	0	0	0	0	0	0	0	0	0	0	0	0	0	0	0	0	0	0	0	0	0	0	0	0	0	0	0	0	0	0	0	0	0	0	0	0	0	7.99297e-05	0	0	0
OTU_584	584							0	0	0	0	0	0	0	0	0	0	0	0	0	0	0	0	0	0	7.99297e-05	0	0	0	0	0	0	0	0	0	0	0	0	0	0	0	0	0	0	7.99297e-05	0.000159859	0	0.000399648	7.99297e-05
OTU_1071	1071	Proteobacteria	Deltaproteobacteria	Myxococcales	Sandaracinaceae			0	0	0	0	0	0	0	0	0	0	0	0	0	0	0	0	0	0	0	0	0	0	0	0	0	0	0	0	0	0	0	0	0	0	0	0	0	0	0.000159859	7.99297e-05	0	7.99297e-05
OTU_1121	1121	Bacteroidetes	Sphingobacteriia	Sphingobacteriales	PHOS-HE51			0	0	0	0	0	0	0	0	0	0	0	0	0	0	7.99297e-05	0	0	0	0	0	0	0	0	0	0	0	0	0	0	0	0	0	0	0	0	0	0	7.99297e-05	0.000159859	7.99297e-05	0.000479578	0.000239789
OTU_733	733	Proteobacteria	Alphaproteobacteria	Rhizobiales	Hyphomicrobiaceae	Hyphomicrobium		0	0	0	0	0	0	0	0	0	0	0	7.99297e-05	0.000239789	0	0	0.0013588	0	0	7.99297e-05	0	0	0	0	0	0	0	0	0	0	0	0	0	0	0	0	0	0	0	0	0	0	0
OTU_1028	1028	Proteobacteria	Alphaproteobacteria	Rhodobacterales	Rhodobacteraceae	Amaricoccus		0	0	0	0	0	0	0	0	0	0	0	0	7.99297e-05	0	0	0	0	0	0	0	0.000159859	0	0	0	0	0	0	0	0	0	0	0	0	0	0	0	0	0	0	0.000319719	0	0
OTU_1449	1449	Bacteroidetes	Cytophagia	Cytophagales	Cytophagaceae			0	0	0	0	0	0	0	0	0	0	0	0	0	0	0	0	0	0	0	0	0	0	0	0	0	0	0	0	0	0	0	0	0	0	0	0	0	0	0.000239789	0.000159859	0	0.000159859
OTU_993	993	Proteobacteria	Deltaproteobacteria	Myxococcales	Phaselicystidaceae	Phaselicystis		0	0	0	0	0	0	0	0	0	0	0	0	0	0	0	0	0	0	0	0	7.99297e-05	0	0	0	0	0	0	0	0	0	0	0	0	0	0	0	0	0	0	7.99297e-05	0	0
OTU_1211	1211	Planctomycetes	Phycisphaerae	Phycisphaerales	Phycisphaeraceae	SM1A02		0	0	0	0	0	0	0	0	0	0	0	0	0	0	0	0	0	0	0	0	0	0	0	0	0	0	0	0	0	0	0	0	0	0	0	0	0	0	0.000239789	7.99297e-05	7.99297e-05	0.000159859
OTU_849	849	Armatimonadetes						0	0	0	0	0	0	0	0	0	0	0	0	0	0	0	0	0	0	0	0	0	0	0	0	0	7.99297e-05	0	0	0	0	0	0	0	0	0	0	0.000159859	0	0.000159859	7.99297e-05	0	7.99297e-05
OTU_1856	1856	Proteobacteria	Deltaproteobacteria	Myxococcales	Blfdi19			0	0	0	0	0	0	0	0	0	0	0	0	0	0	0	0	0	0	0	0	0.000159859	0	0	7.99297e-05	0.000319719	0	0	0	0	0	0	0	0	7.99297e-05	0	0	0	0	0	0	0	0
OTU_1432	1432	Proteobacteria	Deltaproteobacteria	Myxococcales	KD3-10			0	0	0	0	0	0	0	0	0	0	0	0	0	0	0	0	0	0	0	0	0	0	0	0	0	0	0	0	0	0	0	0	0	0	0	0	0	0	0.000399648	0	7.99297e-05	7.99297e-05
OTU_1207	1207	Bacteroidetes	Sphingobacteriia	Sphingobacteriales	Chitinophagaceae	Terrimonas		0	0	0	0	0	0	0	0	0	0	0	0	0	0	0	0	0	0	0	0	0	0	7.99297e-05	0	0	0	0	0	0	0	0	0.000159859	0	0	0	0	0	7.99297e-05	7.99297e-05	7.99297e-05	7.99297e-05	0.000159859
OTU_766	766	Chloroflexi	Anaerolineae	Anaerolineales	Anaerolineaceae			0	0	0	0	0	0	0	0	0	0	0	0	0	0	0	0	0	0	0	0	0	0	0	0	0	0	0	0	0	0	0	0	0	0	0	0	0	0	0	0	7.99297e-05	0.000239789
OTU_1749	1749	Bacteroidetes	Sphingobacteriia	Sphingobacteriales	Sphingobacteriaceae			0	0	0	0	0	0	7.99297e-05	0	0	0	0	7.99297e-05	7.99297e-05	0	0	0	0	0	0	0	7.99297e-05	0	0	0	0.000319719	0	0	0	0	0	7.99297e-05	7.99297e-05	0.000319719	0	7.99297e-05	0	0	0	0	0	0	0
OTU_943	943	Verrucomicrobia	OPB35_soil_group					0	0	0	0	0	0	0	0	0	0	0	7.99297e-05	0	0	0	0	0	0	0	0	0	0	0	0	0	0	0	0	0	0	0	0	0	0	0	0	0	0	0.000159859	0	0.000319719	7.99297e-05
OTU_965	965	Actinobacteria	unidentified_Actinobacteria	Micrococcales	Microbacteriaceae			0	0	0	0	0	0	0	0	0	0	0	0	0	0	0	0	0	0	0	0	0	0	0	0	0	0	0	0	0	0	0	0	0.000159859	0	0	0	0	0	0	0	0	0
OTU_632	632							0	0	0	0	0	0	0	0	0	0	0	0	0	0	0	0	0	7.99297e-05	0	0	0	0	0	0	0	0	0	0	0	0	0	0	0	0	0	0	0	0	0	0	0	0
OTU_986	986	Bacteroidetes	Flavobacteriia	Flavobacteriales	NS9_marine_group			0	0	0	0	0	0	0	0	0	0	0	0	0	0	0	0	0	0	0	0	0	0	0	0	0	0	0	0	0	0	0	0	0	0	0	0	0	0	0	0	7.99297e-05	7.99297e-05
OTU_1772	1772	Planctomycetes	OM190					0	0	0	0	0	0	0	0	0	0	0	0	0.000239789	7.99297e-05	0	0	0	0	0	0	0	0	0	0	0	0	0	0	0	0	0	0	0	0	0	0	7.99297e-05	0	7.99297e-05	7.99297e-05	7.99297e-05	0
OTU_798	798	Bacteroidetes	Sphingobacteriia	Sphingobacteriales	Saprospiraceae			0	0	0	0	0	0	0	0	0	0	0	0	0	0	0	0	0	0	0	0	0	0	0	0	0	0	0	0	0	0	0	0	0	0	0	0	0	0	7.99297e-05	7.99297e-05	0	0.000239789
OTU_871	871	Proteobacteria	Gammaproteobacteria	Xanthomonadales	unidentified_Xanthomonadales	Acidibacter		0	0	0	0	0	0	0	0	0	0	0	0	0	0	0	0	0	0	0	0	0	0	0	0	0	0	0	0	0	0	0	0	0	0	0	0	0	0	7.99297e-05	0.000159859	7.99297e-05	0.000159859
OTU_1074	1074	Acidobacteria	unidentified_Acidobacteria	Subgroup_3	unidentified_Acidobacteria	Bryobacter		0	0	0	0	0	0	0	0	0	0	0	0	0	0	0	0	0	0	0	0	0	0	0	0	0	0	0	0	0	0	0	0	0	0	0	0	0	0	0	7.99297e-05	7.99297e-05	0
OTU_1880	1880	Acidobacteria	unidentified_Acidobacteria	Subgroup_6				0	0	0	0	0	0	0	0	0	0	0	0	0	0	0	0	0	0	0	0	0	0	0	0	0	0	0	0	0	0	0	0	0	0	0	0	0	0	0	7.99297e-05	0	0
OTU_2012	2012	Proteobacteria	Betaproteobacteria	Burkholderiales				0	0	0	0	0	0	0	0	0	0	0	0	0	0	0	0	0	0	0	0	0	0	0	0	0	0	0	0	0	0	0	0	0	0	0	0	0	0	0	0	0	0
OTU_1374	1374	Bacteroidetes	Sphingobacteriia	Sphingobacteriales	env.OPS_17			0	0	0	0	0	0	0	0	0	0	0	0	0	0	0	0	0	0	0.000159859	0	0	0	0	0	0	0	0	0.000159859	0	0	0	0	0	0	0	0	0	0	0	0	0	0
OTU_1186	1186	Proteobacteria	Deltaproteobacteria					0	0	0	0	0	0	0	0	0	0	0	0	0	0	0	0	0	0	0	0	0	0	0	0	0	0	0	0	0	0	0	0	0	0	0	0	0	0	0	7.99297e-05	0.000159859	0
OTU_2019	2019	Elusimicrobia	unidentified_Elusimicrobia	Lineage_IIa				0	0	0	0	0	0	0	0	0	0	0	0	0	0	0	0	0	0	0	0	0	0	0	7.99297e-05	0	0	0	0	0	0	0	0	0	0	0	0	0	0	7.99297e-05	7.99297e-05	7.99297e-05	7.99297e-05
OTU_1420	1420	Proteobacteria	Deltaproteobacteria	Oligoflexales				0	0	0	0	0	0	0	0	0	0	0	0	0	0	0	0	0	0	0	0	0	0	0	0	0	0	0	0	0	0	0	0	0	0	0	0	0	0	0.000159859	7.99297e-05	0	0.000159859
OTU_2183	2183	Proteobacteria	Alphaproteobacteria	Rhodobacterales	Rhodobacteraceae	Amaricoccus		0	0	0	0	0	0	0	0	0	0	0	0	0	0	0	0	0	0	0	0	0	0	0	0	0	0	0	0	0	0	0	0	0	0	0	0	0	7.99297e-05	0	0	0	0
OTU_920	920	Proteobacteria	Deltaproteobacteria	Myxococcales	Phaselicystidaceae	Phaselicystis		0	0	0	0	0	0	0	0	0	0	0	0	0	0	0	0	0	0	0	0	0	0	0	0	0	0	0	0	0	0	0	0	0	0	0	0	0	0	0.000159859	0	7.99297e-05	0
OTU_1183	1183	Bacteroidetes	Sphingobacteriia	Sphingobacteriales				0	0	0	0	0	0	0	0	0	0	0	0	0	0	0	0	0	0	0	0	0	0	0	0	0	0	0	0	0	0	0	0	0	0	0	0	0	0	7.99297e-05	7.99297e-05	0	0.000159859
OTU_1322	1322	Proteobacteria	Alphaproteobacteria	Rhizobiales	Bradyrhizobiaceae			0	0	0	0	0	0	0	0	0	0	0	0	0	0	0	0	0	0	0	0	0	0	0	0	0	0	0	0	0	0	0	0	0	0	0	0	0	0	0	0	0	0
OTU_1646	1646	Verrucomicrobia	Verrucomicrobiae	Verrucomicrobiales	Verrucomicrobiaceae			0	0	0	0	0	0	0	0	0	0	0	0	0	7.99297e-05	0	0	0	0	0	0	0	0	0	0	0	0	0	0	0	0	0	0	0	0	0	0	0	7.99297e-05	0	0	0	0
OTU_2376	2376	Bacteroidetes	Flavobacteriia	Flavobacteriales	Flavobacteriaceae	Flavobacterium		0	0	0	0	0	0	0	0	0	0	0	0	0	0	0	0	0	0	0	0	0	0	0	0	0	0	0	0	0	0	0	0	0	0	0	0	0	0	0	0	0	0
OTU_2528	2528	Bacteroidetes	Sphingobacteriia	Sphingobacteriales	Saprospiraceae			0	0	0	0	0	0	0	0	0	0	0	0	0	0	0	0	0	0	0	0	0	0	0	0	0	0	0	0	0	0	0	0	0	0	0	0	0	0	7.99297e-05	7.99297e-05	7.99297e-05	0.000239789
OTU_2062	2062	Proteobacteria	Alphaproteobacteria	Sphingomonadales				0	0	0	0	0	0	0	0	0	0	0	0	0	0	0	7.99297e-05	0	0	0	0	0	0	0	0	0	0	0	0	0	0	0	0	0	0	0	0	0	0	0	7.99297e-05	7.99297e-05	7.99297e-05
OTU_1127	1127	Verrucomicrobia	Spartobacteria	Chthoniobacterales	Chthoniobacteraceae	Chthoniobacter		0	0	0	0	0	0	0	0	0	0	0	0	0	0	0	0	0	0	0	0	0	0	0	0	0	0	0	0	0	0	0	0	0	0	0	0	0	0	0	7.99297e-05	0	0
OTU_826	826	Proteobacteria	Gammaproteobacteria	Cellvibrionales				0	0	0	0	0	0	0	0	0	0	0	0	0	0	0	0	0	0	0	0	0	0	0	0	0	0	0	0	0	0	0	0	0	0	0	0	0	0	0	0	0.000159859	7.99297e-05
OTU_914	914	Bacteroidetes	Sphingobacteriia	Sphingobacteriales				0	0	0	0	0	0	0	0	0	0	0	0	0	0	0	0	0	0	0	0	0	0	0	0	0	0	0	0	0	0	0	0	0	0	0	0	0	0	7.99297e-05	7.99297e-05	0	0
OTU_1024	1024	Proteobacteria	Alphaproteobacteria	Rhizobiales	A0839			0	0	0	0	0	0	0	0	0	0	0	0	0	0	0	0	0	0	0	0	0	0	0	0	0	0	0	0	0	0	0	0	0	0	0	0	0	0	0	0	0	0
OTU_1467	1467	Proteobacteria	Deltaproteobacteria	Myxococcales	Sandaracinaceae			0	0	0	0	0	0	0	0	0	0	7.99297e-05	0	0	0	0	0	0	0	0	0	0	0	0	0	0	0	0	0	0	0	0	0	0	0	0	0	0	0	7.99297e-05	0	0.000159859	7.99297e-05
OTU_1610	1610	Proteobacteria	Alphaproteobacteria	Rhodobacterales	Rhodobacteraceae	Gemmobacter		0	0	0	0	0	0	0	0	0	0	0	0	0	0	0	0	0	0	0	0	0	0	0	0	0	0.000159859	0	0	0	0	0	0	0	0	0	0	0	0	0.000239789	0	0	0
OTU_1354	1354	Proteobacteria	TA18					0	0	0	0	0	0	0	0	0	0	0	0	0	0	0	0	0	0	0	0	0	0	0	0	0	0	0	0	0	0	0	0	0	0	0	0	0	0	0.000239789	0	0	7.99297e-05
OTU_1298	1298	Proteobacteria	Alphaproteobacteria	Rhodospirillales	I-10			0	0	0	0	0	0	0	0	0	0	0	0	0	0	0	0	0	0	0	0	0	0	0	0	0	0	0	0	0	0	0	0	0	0	0	0	0	0	0	7.99297e-05	0	7.99297e-05
OTU_1978	1978	Proteobacteria	Deltaproteobacteria	Oligoflexales				0	0	0	0	0	0	0	0	0	0	0	0	0	0	0	0	0	0	0	0	0	0	0	0	0	0	0	7.99297e-05	0	0	0	0	0	0	0	0	0	0	7.99297e-05	7.99297e-05	0	7.99297e-05
OTU_4592	4592	Planctomycetes	vadinHA49					0	0	0	0	0	0	0	0	0	0	0	0	7.99297e-05	0	0	0	0	0	0	0	0	0	0	0	7.99297e-05	0	0	0	0	7.99297e-05	0	0	0	0	0	0	0	0	7.99297e-05	0.000159859	0	0
OTU_2830	2830	Proteobacteria	Deltaproteobacteria	Oligoflexales				0	0	0	0	0	0	0	0	0	0	0	0	0	0	0	0	7.99297e-05	0	0	0	0	0	0	0	0	0	0	0	0	0	0	0	0	0	0	0	0	0	0.000319719	7.99297e-05	0	0
OTU_1792	1792	Actinobacteria	Acidimicrobiia	Acidimicrobiales				0	0	0	0	0	0	0	0	0	0	0	0	0	0	0	0	0	0	0	0	0	0	0	0	0	0	0	0	0	7.99297e-05	0	0	0	0	0	0	0	0	0	0	0	0
OTU_2589	2589	Armatimonadetes						0	0	0	0	0	0	0	0	0	0	0	0	0	0	0	0	0	0	0	0	0	0	0	0	0	0	0	0	0	0	0	0	0	0	0	0	0	0	0	0	0	7.99297e-05
OTU_1456	1456	Proteobacteria	Deltaproteobacteria	Oligoflexales				0	0	0	0	0	0	0	0	0	0	0	0	0	0	0	0	0	0	0	0	0	0	0	0	0	0	0	0	0	0	0	0	0	0	0	0	7.99297e-05	0	0	0	7.99297e-05	0
OTU_1603	1603	Proteobacteria	Deltaproteobacteria					0	0	0	0	0	0	0	0	0	0	0	0	0	7.99297e-05	0	0	0	0	0	0	0	0	0	0	0	0	0	0	0	0	0	0	0	0	0	0	0	0	0	0	0	0
OTU_1437	1437	Proteobacteria	Deltaproteobacteria	Oligoflexales				0	0	0	0	0	0	0	0	0	0	0	0	0	7.99297e-05	7.99297e-05	0	0	0	0	0	0	0	0	0	0	0	0	0	0	0	0	0	0	0	0	0	0	0	7.99297e-05	0	0	0
OTU_983	983	Latescibacteria						0	0	0	0	0	0	0	0	0	0	0	0	0	0	0	0	0	0	0	0	0	0	0	0	0	0	0	0	0	0	0	0	0	0	0	0	0	0	0.000159859	0	7.99297e-05	0.000319719
OTU_1166	1166	Proteobacteria	Deltaproteobacteria	Myxococcales	Haliangiaceae	Haliangium		0	0	0	0	0	0	0	0	0	0	0	0	0	0	0	0	0	0	0	0	0	7.99297e-05	0	0	0	0	0	0	0	0	0	0	0	0	0	0	0	0	0	0	0	0
OTU_3805	3805	Proteobacteria	Deltaproteobacteria	Myxococcales	Polyangiaceae	Sorangium		0	0	0	0	0	0	0	0	0.000159859	0	0	0	0	0	0	0	0	0	0	0	0	0	0	0	0	0	0	0	0	0	0	0	0	0	0	0	0	0	7.99297e-05	7.99297e-05	0	0
OTU_2160	2160	Bacteroidetes	Cytophagia	Cytophagales	Cytophagaceae	Ohtaekwangia		0	0	0	0	0	0	0	0	0	0	0	0	0	0	0	0	0	0	0	0	0	0	0	0	0	0	0	0	0	0	0	7.99297e-05	0	0	0	0	0	0	7.99297e-05	7.99297e-05	0.000159859	7.99297e-05
OTU_2321	2321	Proteobacteria	Alphaproteobacteria	Rhizobiales	Hyphomicrobiaceae	Prosthecomicrobium		0	0	0	0	0	0	0	0	0	0	0	0	0	0	0	0	0	0	0	0	0	0	0	0	0	0	0	0	0	0	0	0	0	0	0	0	0	0	0.000159859	0	7.99297e-05	7.99297e-05
OTU_1252	1252	Verrucomicrobia	Verrucomicrobiae	Verrucomicrobiales	Verrucomicrobiaceae	Verrucomicrobium		0	0	0	0	0	0	0	0	0	0	0	0	0	0	0	0	0	0	0	0	0.000159859	0	0	0	7.99297e-05	7.99297e-05	0	0	0	0	0	0	0	0	0	0	0	0	0	0	0	0
OTU_1215	1215	Proteobacteria						0	0	0	0	0	0	0	0	0	0	0	0	0	0	0	0	0	0	0	0	0	0	0	0	0	0	0	0	0	0	0	0	0	0	0	0	0	0	0	0	0.000399648	0
OTU_2098	2098	Proteobacteria	Deltaproteobacteria	Myxococcales	Phaselicystidaceae	Phaselicystis		0	0	0	0	0	0	0	0	0	0	0	0	0	0	0	0	0	0	0	0	0	0	0	0	0	0	0	0	0	0	0	0	0	0	0	0	0	0	7.99297e-05	7.99297e-05	0	7.99297e-05
OTU_2243	2243	Bacteroidetes	Sphingobacteriia	Sphingobacteriales	Chitinophagaceae			0	0	0	0	0	0	0	0	0	0	0	0	0	0	0	0	0	0	0	0	0	0	0	0	0	0	0	7.99297e-05	0	0	0	0	0	0.000319719	0	0	0	0	7.99297e-05	0	0	0
OTU_3767	3767	Verrucomicrobia	OPB35_soil_group					0	0	0	0	0	0	0	0	0	0	0	0	0	0	0	0	0	0	0	0	0	0	0	0	0	0	0	0	0	0	0	0	0	0	0	0	0	7.99297e-05	0.000159859	7.99297e-05	7.99297e-05	0.000159859
OTU_1060	1060	Spirochaetes	unidentified_Spirochaetes	Spirochaetales	Leptospiraceae	Turneriella	Turneriella_parva	0	0	0	0	0	0	0	0	0	0	0	0	0	0	0	0	0	0	0	0	0	0	0	0	0	0	0	0	0	7.99297e-05	0	0	0	0	0	0	0	0	7.99297e-05	7.99297e-05	0	0
OTU_1376	1376	Verrucomicrobia	Spartobacteria	Chthoniobacterales	Chthoniobacteraceae	Chthoniobacter		0	0	0	0	0	0	0	0	0	0	0	0	0	0	0	0	0	0	0	0	0	0	0	0	0	0	0	0	0.000239789	0	0	0	0	0	0	0	0	0	0	0	0	0
OTU_2276	2276	Bacteroidetes						0	0	0	0	0	0	0	0	0	0	0	0	0	0	0	0	0	0	0	0	0	0	0	0	0	0	0	0	0	0	0	0	0	0	0	0	0	0	7.99297e-05	0	0	0
OTU_2285	2285	Verrucomicrobia	OPB35_soil_group					0	0	0	0	0	0	0	0	0	0	0	0	0	0	0	0	0	0	0	0	0	0	0	0	0	0	0	0	0	0	0	0	0	0	0	0	0	0	0	0	7.99297e-05	0
OTU_1442	1442	Proteobacteria	Deltaproteobacteria	Bdellovibrionales	Bdellovibrionaceae			0	0	0	0	0	0	0	0	0	0	0	0	0	0	0	0	0	0	0	0	0	0	0	0	0	0	0	0	0	0	0	0	0	0	0	0	0	0	0	0	0	0
OTU_1361	1361	Proteobacteria	Deltaproteobacteria	Myxococcales	Polyangiaceae	Sorangium		0	0	0	0	0	0	0	0	0	0	0	0	0	0	0	0	0	0	0	0	0	0	0	0	0	0	0	0	0	0	0	0	0	0	0	0	0	0	7.99297e-05	0	0	0
OTU_1259	1259	Gemmatimonadetes	unidentified_Gemmatimonadetes	AT425-EubC11_terrestrial_group				0	0	0	0	0	0	0	0	0	0	0	0	0	0	0	0	0	0	0	0	0	0	0	0	0	0	0	0	0	0	0	0	0	0	0	0	0	0	0	0	0	0
OTU_1294	1294	Proteobacteria	Gammaproteobacteria	Pseudomonadales	Moraxellaceae			0	0	0	0	0	0	0	0	0	0	0	0	0	0	0	0	0	0	0	0	0	0	0	0	0	0	0	0	0	0	0	0	0	0	0	0	0	0	0	0	0	0
OTU_2314	2314	Proteobacteria	Gammaproteobacteria	NKB5				0	0	0	0	0	0	0	0	0	0	0	0	0	0	0	0	0	0	0	0	0	0	0	0	0	0	0	0	0	0	0	0	0	0	0	0	0	0	0	0	0	0
OTU_2073	2073	Fibrobacteres	Fibrobacteria	Fibrobacterales	Fibrobacteraceae			0	0	0	0	0	0	0	0	0	0	0	0	0	0	0	0	0	0	0	0	0	0	0	0	0	0	0	0	0	0	0	0	0	0	0	0	0	0	0	7.99297e-05	0	0
OTU_3719	3719	Gemmatimonadetes	unidentified_Gemmatimonadetes	unidentified_Gemmatimonadetes	S0134_terrestrial_group			0	0	0	0	0	0	0	0	0	0	0	0	0	0	0	0	0	0	0	0	0	0	0	0	0	0	0	0	0	0	0	0	0	0	0	0	0	0	0	0	7.99297e-05	0
OTU_1286	1286	Proteobacteria	Betaproteobacteria					0	0	0	0	0	0	0	0	0	0	0	0	0	0	0	0	0	0	0	0	0	0	0	0	0	0	0	0	0	0	0	0	0	0	0	0	0	0	0	7.99297e-05	0	0.000159859
OTU_2286	2286	Proteobacteria	TA18					0	0	0	0	0	0	0	0	0	0	0	0	0	0	0	0	0	0	0	0	0	0	0	0	0	0	0	7.99297e-05	0	0	0	0	0	0	0	0	0	0	0	7.99297e-05	0	0
OTU_2878	2878	Proteobacteria	Alphaproteobacteria	Rhizobiales	Hyphomicrobiaceae	Hyphomicrobium		0	0	0	0	0	0	0	0	0	0	0	0	0	0	0	0	0	0	0	0	0	0	0	0	0	0	0	0	0	0	0	0	0	0	0	0	0	0	0	0	0	0
OTU_2380	2380	Proteobacteria	Deltaproteobacteria	Myxococcales	27F-1492R			0	0	0	0	0	0	0	0	0	0	0	0	0	0	0	0	0	0	0	0	0	0	0	0	0	0	0	0	0	0	0	0	0	0	0	0	0	0	0	0	0	7.99297e-05
OTU_2214	2214	Proteobacteria	Deltaproteobacteria	Bdellovibrionales	Bdellovibrionaceae	Bdellovibrio		0	0	0	0	0	0	0	0	0	0	0	0	0	0	0	0	0	0	0	0	0	0	0	0	0	0	0	0	0	0	0	0	0	0	0	0	0	0	0	0	7.99297e-05	0
OTU_1231	1231	Bacteroidetes	Sphingobacteriia	Sphingobacteriales	Sphingobacteriaceae	Sphingobacterium	Sphingobacterium_faecium	0	0	0	0	0	0	0	0	0	0	0	0	0	0	0	0	0	0	0	0	0.000239789	0	7.99297e-05	0	0	0	0	0	0	0	0	0	0	0	0	0	0	0	0	0	0	0
OTU_2439	2439	Acidobacteria	unidentified_Acidobacteria	Subgroup_4	unidentified_Acidobacteria	Blastocatella		0	0	0	0	0	0	0	0	0	0	0	0	0	0	0	0	0	0	0	0	0	0	0	0	0	0	0	0	0	0	0	0	0	0	0	0	0	0	0	0	0	0
OTU_3063	3063	Proteobacteria	Betaproteobacteria	Nitrosomonadales	Nitrosomonadaceae			0	0	0	0	0	0	0	0	0	0	0	0	0	0	0	0	0	0	0	0	0	0	0	0	0	0	0	0	0	0	0	0	0	0	0	0	0	0	0	0	0	0
OTU_1692	1692	Acidobacteria	unidentified_Acidobacteria	Subgroup_4	43063			0	0	0	0	0	0	0	0	0	0	0	0	0	0	0	0	0	0	0	0	0	0	0	0	0	0	0	0	0	0	0	0	0	0	0	0	0	0	0	0	0	0
OTU_2266	2266	Bacteroidetes	Cytophagia	Cytophagales	Cytophagaceae			0	0	0	0	0	0	0	0	0	0	0	0	0	0	0	0	0	0	0	0	0	0	0	0	0	0.000159859	0	0	0	0	0	0	0	0	0	0	0	0	7.99297e-05	0	7.99297e-05	0
OTU_3018	3018	Proteobacteria	Deltaproteobacteria	Myxococcales	Haliangiaceae	Haliangium		0	0	0	0	0	0	0	0	0	0	0	0	0	0	0	0	0	0	0	0	0	0	0	0	0	0	0	0	0	0	0	0	0	0	0	0	0	0	0	0	0	0
OTU_4388	4388	Actinobacteria	unidentified_Actinobacteria	Micrococcales	Cellulomonadaceae	Actinotalea		0	0	0	0	0	0	0	0	0	0	0	0	0	0	0	0	7.99297e-05	0	0	0	0	0	0	0	0	0	0	0	0	0	0	0	0	0	0	0	0	0	0	0	0	0
OTU_1170	1170	Proteobacteria	Gammaproteobacteria	Cellvibrionales	Cellvibrionaceae	Simiduia		0	0	0	0	0	0	0	0	0	0	0	0	0	0	0	0	0	0	0	0	0	0	0	0	0	0	0	0	0	0	0	0	0	0	0	0	0	0	0	0	0	0
OTU_2671	2671	Proteobacteria	Deltaproteobacteria	Bdellovibrionales	Bdellovibrionaceae	Bdellovibrio		0	0	0	0	0	0	0	0	0	0	0	0	0	0	0	0	0	0	0	0	0	0	0	0	0	0	0	0	0	0	0	0	0	0	0	0	0	0	7.99297e-05	0	0	0
OTU_1189	1189	Proteobacteria	Alphaproteobacteria					0	0	0	0	0	0	0	0	0	0	0	0	0	0	0	0	0	0	0	0	0	0	0	0	0	0	0	0	0	0	0	0	0	0	0	0	0	0	0	0	0	0
OTU_1967	1967	Proteobacteria	Deltaproteobacteria					0	0	0	0	0	0	0	0	0	0	0	0	0	0	0	0	0	0	0	0	0	0	0	0	0	0	0	0	0	0	0	0	0	0	0	0	0	0	0	0	0	0
OTU_3628	3628	Proteobacteria	Alphaproteobacteria	Rhizobiales	DUNssu044			0	0	0	0	0	0	0	0	0	0	0	0	0	0	0	0	0	0	0	0	0	0	0	0	0	0	0	0	0	0	0	0	0	0	0	0	0	0	0	0	0	0
OTU_1782	1782	WCHB1-60						0	0	0	0	0	0	0	0	0	0	0	0	0	0	0	0	0	0	0	0	0	0	0	0	0	0	0	0	0	0	0	0	0	0	0	0	0	0	0	0	0	0
OTU_2242	2242	Proteobacteria	Alphaproteobacteria	Rickettsiales				0	0	0	0	0	0	0	0	0	0	0	0	0	0	0	0	0	0	0	0	0	0	0	0	0	0	0	0	0	0	0	0	0	0	0	0	0	0	0	7.99297e-05	0	0
OTU_1803	1803							0	0	0	0	0	0	0	0	0	0	0	0	0	0	0	0	0	0	0	0	0	0	0	0	0	0	0	0	0	0	0	0	7.99297e-05	0	0	0	0	0	7.99297e-05	0	7.99297e-05	0
OTU_2365	2365	Proteobacteria	Betaproteobacteria	Burkholderiales	Comamonadaceae			0	0	0	0	0	0	0	0	0	0	0	0	0	0	0	0	0	0	0	0	0	0	0	0	0	0	0	0	0	0	0	0	0	0	0	0	0	0	0	7.99297e-05	0	0
OTU_2457	2457	Elusimicrobia	unidentified_Elusimicrobia	Lineage_IIb				0	0	0	0	0	0	0	0	0	0	0	0	0	0	0	0	0	0	0	0	0	0	0	0	0	0	0	0	0	0	0	0	0	0	0	0	0	0	0	7.99297e-05	7.99297e-05	7.99297e-05
OTU_2722	2722	Verrucomicrobia	OPB35_soil_group					0	0	0	0	0	0	0	0	0	0	0	0	0	0	7.99297e-05	0	0	0	0	0	0	0	0	0	0	0	0	7.99297e-05	0	0	0	0	0	0	0	0	0	0	0	0	0	0
OTU_1981	1981	Bacteroidetes	Sphingobacteriia	Sphingobacteriales	Sphingobacteriaceae			0	0	0	0	0	0	0	0	0	0	0	0	0	0	0	0	0	0	0	0	0	0	0	0	0	0	0	0	0	0	0	0	0	0	0	0	0	0	0	0	0	0
OTU_2234	2234	Gemmatimonadetes	unidentified_Gemmatimonadetes	AT425-EubC11_terrestrial_group				0	0	0	0	0	0	0	0	0	0	0	0	0	0	0	0	0	0	0	0	0	0	0	0	0	0	0	0	0	0	0	0	0	0	0	0	0	0	0	0	0	0
OTU_3462	3462	Proteobacteria	Deltaproteobacteria	Myxococcales	Haliangiaceae	Haliangium		0	0	0	0	0	0	0	0	0	0	0	0	0	0	0	0	0	0	0	0	0	0	0	0	0	0	0	0	0	0	0	0	0	0	0	0	0	0	0	0	0	0
OTU_2022	2022	Actinobacteria						0	0	0	0	0	0	0	0	0	0	0	0	0	0	0	0	0	0	0	0	0	0	0	0	0	0	0	0	0	0	0	0	0	0	0	0	0	0	0	0	0	0
OTU_2101	2101	Elusimicrobia	unidentified_Elusimicrobia	Lineage_IV				0	0	0	0	0	0	0	0	0	0	0	0	0	0	0	0	0	0	0	0	0	0	0	0	0	0	0	0	0	0	0	0	0	0	0	0	0	0	0	7.99297e-05	0	0
OTU_2174	2174	Planctomycetes	Planctomycetacia	Planctomycetales	Planctomycetaceae	Gemmata		0	0	0	0	0	0	0	0	0	0	0	0	0	0	0	0	0	0	0	0	0	0	0	0	0	0	0	0	0	0	0	0	0	0	0	0	0	0	0	0	0	0
OTU_2970	2970	Acidobacteria	unidentified_Acidobacteria	Subgroup_17				0	0	0	0	0	0	0	0	0	0	0	0	0	0	0	0	0	0	0	0	0	0	0	0	0	0	0	0	0	0	0	0	0	0	0	0	0	0	0	0	0	0
OTU_4134	4134	Acidobacteria	unidentified_Acidobacteria	Subgroup_4	43063			0	0	0	0	0	0	0	0	0	0	0	0	0	0	0	0	0	0	0	0	0	0	0	0	0	0	0	0	0	0	0	0	0	0	0	0	0	0	0	0	7.99297e-05	0
OTU_2094	2094	Bacteroidetes	Cytophagia	Order_II	Rhodothermaceae			0	0	0	0	0	0	0	0	0	0	0	0	0	0	0	0	0	0	0	0	0	0	0	0	0	0	0	7.99297e-05	0	0	0	0	0	0	0	0	0	0	0	0	0	0
OTU_2135	2135	Bacteroidetes	Sphingobacteriia	Sphingobacteriales	env.OPS_17			0	0	0	0	0	0	0	0	0	0	0	0	0	0	0	0	0	0	0	0	0	0	0	0	0	0	0	0	0	0	0	0	0	0	0	0	0	0	0	7.99297e-05	0	0
OTU_2229	2229	Proteobacteria	Deltaproteobacteria	Oligoflexales				0	0	0	0	0	0	0	0	0	0	0	0	0	0	0	0	0	0	0	0	0	0	0	0	0	0	0	0	0	0	0	0	0	0	0	0	0	0	0	0	0	0
OTU_2564	2564	Chlorobi	Chlorobia	Chlorobiales	OPB56			0	0	0	0	0	0	0	0	0	0	0	0	0	0	0	0	0	0	0	0	0	0	0	0	0	0	0	0	0	0	0	0	0	0	0	0	0	0	0	0	7.99297e-05	0
OTU_4723	4723	Bacteroidetes	Sphingobacteriia	Sphingobacteriales	NS11-12_marine_group			0	0	0	0	0	0	0	0	0	0	0	0	0	0	0	0	0	0	0	0	0	0	0	0	0	0	0	7.99297e-05	0	0	0	0	0	0	0	0	0	0	0	0	0	0
OTU_3146	3146	Proteobacteria	Deltaproteobacteria	Myxococcales	Polyangiaceae	Sorangium		0	0	0	0	0	0	0	0	0	0	0	0	0	0	0	0	0	0	0	0	0	0	0	0	0	0	0	0	0.000159859	0	0	0	0	0	0	0	0	0	0	0	0	0
OTU_3369	3369	Proteobacteria	Betaproteobacteria	Rhodocyclales	Rhodocyclaceae	Azoarcus		0	0	0	0	0	0	0	0	0	0	0	0	0	0	0	0	0	0	0	0	0	0	0	0	0	0	0	0	0	0	0	0	0	0	0	0	0	0	0	0	0	0
OTU_2550	2550	Planctomycetes	Phycisphaerae	Phycisphaerales	Phycisphaeraceae	SM1A02		0	0	0	0	0	0	0	0	0	0	0	0	0	0	0	0	0	0	0	0	0	0	0	0	0	0	0	0	0	0	0	0	0	0	0	0	0	0	0	0	0	0
OTU_2754	2754	Lentisphaerae	DEV055					0	0	0	0	0	0	0	0	0	0	0	0	0	0	0	0	0	0	0	0	0	0	0	0	0	0	0	0	0	0	0	0	0	0	0	0	0	0	0	0	0	0
OTU_3174	3174	Proteobacteria	Alphaproteobacteria	DB1-14				0	0	0	0	0	0	0	0	0	0	0	0	0	0	0	0	0	0	0	0	0	0	0	0	0	0	0	0	0	0	0	0	0	0	0	0	0	0	0	0	0	0
OTU_3899	3899	Proteobacteria	Deltaproteobacteria	Desulfuromonadales				0	0	0	0	0	0	0	0	0	0	0	0	0	0	0	0	0	0	0	0	0	0	0	0	0	0	0	0	0	0	0	0	0	0	0	0	0	0	0	0	0	0
OTU_4094	4094	Planctomycetes	Pla4_lineage					0	0	0	0	0	0	0	0	0	0	0	0	0	0	0	0	0	0	0	0	0	0	0	0	0	0	0	0	0	0	0	0	0	0	0	0	0	0	0	0	0	0
OTU_4172	4172	Proteobacteria	Deltaproteobacteria	Myxococcales	Sandaracinaceae			0	0	0	0	0	0	0	0	0	0	0	0	0	0	0	0	0	0	0	0	0	0	0	0	0	0	0	0	0	0	0	0	0	0	0	0	0	0	0	0	0	0
OTU_4273	4273	Proteobacteria	Deltaproteobacteria	Myxococcales	P3OB-42			0	0	0	0	0	0	0	0	0	0	0	0	0	0	0	0	0	0	0	0	0	0	0	0	0	0	0	0	0	0	0	0	0	0	0	0	0	0	0	0	0	0
OTU_4523	4523	Proteobacteria						0	0	0	0	0	0	0	0	0	0	0	0	0	0	0	0	0	0	0	0	0	0	0	0	0	0	0	0	0	0	0	0	0	0	0	0	0	0	0	0	0	0
OTU_4725	4725	Proteobacteria						0	0	0	0	0	0	0	0	0	0	0	0	0	0	0	0	0	0	0	0	0	0	0	0	0	0	0	0	0	0	0	0	0	0	0	0	0	0	0	0	0	0
OTU_11	11	Proteobacteria	Alphaproteobacteria	Rhizobiales	Rhizobiaceae	Rhizobium	Rhizobium_leguminosarum	0	0	0	0	0	0	0	0	0	0	0	0.000159859	0	7.99297e-05	7.99297e-05	0.00127887	0	7.99297e-05	0.000159859	0.00247782	0.000559508	0.000319719	0	0.00143873	0.00319719	0.00335705	0.00103909	0.00423627	0.137159	0.00119894	0.0313324	0.000239789	0.0021581	0.449285	0.000959156	0.000479578	0	0	0.000479578	0.000559508	0.000639437	0.00199824
OTU_28	28	Actinobacteria	unidentified_Actinobacteria	Propionibacteriales	Propionibacteriaceae	Propionibacterium		0.0120694	0.0460395	0.0281352	0.00343698	0.00895212	0.012549	0.0692191	0.0928783	0.00519543	0.0248581	0.00839261	0.00735353	0.0168652	0.00415634	0.00223803	0.00159859	0.00119894	0.00719367	0.00167852	0.00143873	0.00303733	0.000159859	0.000159859	0.000239789	0.000239789	0.00311726	0.000559508	0.00103909	7.99297e-05	0.00207817	0.000239789	0.000959156	0.00247782	0.00247782	0.000479578	7.99297e-05	0.000719367	0.00127887	0	7.99297e-05	0	7.99297e-05
OTU_15	15	Proteobacteria	Betaproteobacteria	Burkholderiales	Burkholderiaceae	Limnobacter	bacterium_Ellin5074	0.000239789	0.000159859	0.000399648	0.319879	0.000479578	0	0	0	0.000479578	0	0	0	0	0	0	0	0	0	0	0	0	0	0	0	0	0	0	0	0	0	0	0	0	0	0	0	0	0	0	0	7.99297e-05	0
OTU_59	59	Proteobacteria	Betaproteobacteria	SC-I-84				0	0	0	0	0	0	7.99297e-05	0	0.00175845	0	0	0.000239789	0.000159859	0	0.000159859	0.000159859	7.99297e-05	0.000159859	0	0	0	0	0	0	0	0.000159859	7.99297e-05	0.000159859	0	7.99297e-05	0	0	0	0	0	0.000159859	0.000239789	0.000479578	0.00719367	0.00519543	0.00623451	0.0080729
OTU_42	42	Firmicutes	Bacilli	Bacillales	Bacillaceae	Bacillus	Bacillus_phage_phBC6A52	0	0	0	0	0	0.000479578	0.0115099	0	0.00119894	0	0.000159859	0.0165454	0.0100711	0.00679402	0.0013588	7.99297e-05	0.0233395	0.0029574	0.0120694	0.000639437	0.000719367	0.000239789	0.000239789	0.000159859	7.99297e-05	0.000479578	0.000399648	0	0.000559508	7.99297e-05	0.00327712	0.0021581	0.00119894	0.000719367	0.000319719	0	0.000159859	7.99297e-05	0.000799297	0.000639437	0.000879226	0.000399648
OTU_2436	2436	Proteobacteria	Betaproteobacteria	Burkholderiales	Oxalobacteraceae	Massilia		0	0.00759332	0	0	0	7.99297e-05	0	7.99297e-05	0	0.00695388	0.000239789	0.000399648	0.000319719	0.000239789	0.000239789	0.000159859	0.00719367	0	0.000159859	0.00663416	0.00735353	0.000799297	0.00775318	0.00463592	0.0013588	0.00151866	0.00375669	0.000719367	7.99297e-05	7.99297e-05	0	0.000559508	7.99297e-05	0.000319719	7.99297e-05	0.000879226	0.000399648	7.99297e-05	0	7.99297e-05	0	0
OTU_63	63	Actinobacteria	unidentified_Actinobacteria	Corynebacteriales	Mycobacteriaceae	Mycobacterium	Mycobacterium_abscessus	0	0	0	0	0	0	0.0064743	0.00887219	0	0.000159859	7.99297e-05	0.00543522	0.000239789	0.000399648	0.00455599	0.0013588	0	0.0222204	0.00391655	7.99297e-05	0	7.99297e-05	7.99297e-05	0	7.99297e-05	0	0	0	0.000159859	0	0	7.99297e-05	0	0	0	0	0	0	7.99297e-05	0	0	0
OTU_99	99	Gemmatimonadetes	unidentified_Gemmatimonadetes	Gemmatimonadales	Gemmatimonadaceae			0	0	0	0	0	0	0	0	0	0	0	0	7.99297e-05	0.000239789	0	0	0	0	0	7.99297e-05	0	0	0	0	0	0	7.99297e-05	0	7.99297e-05	0	0	0	0	7.99297e-05	0	0	0.000239789	7.99297e-05	0.00423627	0.00423627	0.00167852	0.00383662
OTU_4381	4381	Bacteroidetes	Flavobacteriia	Flavobacteriales	Flavobacteriaceae	Cloacibacterium		0	0.00671409	0	0	0	0	0	0	0	0.00543522	7.99297e-05	0.000319719	0.000239789	7.99297e-05	7.99297e-05	7.99297e-05	0.00751339	0	0	0	0	0	0	0	7.99297e-05	7.99297e-05	0	0	0	0	0	0	0.000159859	0.000159859	0	0	0	0.0306131	0	0	7.99297e-05	0
OTU_132	132	Proteobacteria	Alphaproteobacteria	Rhodospirillales	unidentified_Rhodospirillales	Reyranella		0	0	0	0	0	0	0	0	0	0	0	0.000159859	0.00263768	0	0	0	0	0.00191831	0	0	7.99297e-05	0	0	0	0	0.000879226	0	0	0	0	0	7.99297e-05	0	0	0	7.99297e-05	0	7.99297e-05	0.00191831	0.00223803	0.00119894	0.00207817
OTU_180	180	Actinobacteria	unidentified_Actinobacteria	Streptomycetales	Streptomycetaceae	Streptomyces		0	0	0	0	0	0	0	0	0	0	7.99297e-05	0.000239789	0.000159859	7.99297e-05	0.000319719	7.99297e-05	0.000159859	0.000159859	7.99297e-05	0.00239789	0.00975142	0.000159859	7.99297e-05	0.000639437	0.000239789	7.99297e-05	0.000959156	0.000319719	0.000879226	0	0.00103909	0.000559508	0.00207817	0.000159859	0.000239789	0	0	0	0.000399648	0.00111902	0.000319719	0.000639437
OTU_137	137	Actinobacteria	unidentified_Actinobacteria	Micrococcales	Microbacteriaceae	Curtobacterium	Curtobacterium_luteum	0	0.00367676	0	0	0	0	0.00311726	0	0	0	0	0.000719367	0.000239789	7.99297e-05	0.000319719	7.99297e-05	0	7.99297e-05	7.99297e-05	0.00711374	0	0	0.00447606	0.00271761	0.000799297	0.000799297	0.000959156	0.000559508	7.99297e-05	7.99297e-05	0	0.000559508	0.0013588	0.000159859	7.99297e-05	0	0	7.99297e-05	7.99297e-05	0	0	0
OTU_375	375	Proteobacteria	Betaproteobacteria	Burkholderiales	Comamonadaceae			0	0	0	0	0	0	0	0	0	0	0	0	7.99297e-05	0	7.99297e-05	0	0	7.99297e-05	0	0	0	0	0	0	0	0	7.99297e-05	0	0	0	0	0	7.99297e-05	0	0	0	7.99297e-05	7.99297e-05	0.00159859	0.00199824	0.00327712	0.00159859
OTU_148	148	Actinobacteria	unidentified_Actinobacteria	Micrococcales				0	0	0	0	0	0	0	0.0260571	0	7.99297e-05	0	0	0	0	0	0	0	0	0	0	0	0	0	0	0	0	0	0	0	0	0	0	0	0	0	0	0	0	0	0	0	0
OTU_172	172	Proteobacteria	Betaproteobacteria	Nitrosomonadales	Nitrosomonadaceae			0	0	0	0	0	0	0	0	0	0	0	0	0	0	0.000159859	0.000239789	0	0	0	0	0	0	0	0.000159859	0	0	0	7.99297e-05	0	0	0	0	0	0	0	0	0	0	0.000399648	0.000319719	0.00439613	0.000719367
OTU_1068	1068	Proteobacteria	Alphaproteobacteria	Sphingomonadales				0	0	0	0	0	0	0	0	0	0	0.000159859	0	0	0	7.99297e-05	0	0	0	0	0	0	0	0	0	0	7.99297e-05	0	7.99297e-05	0	0	0	0	0.000159859	0	0	0	0	7.99297e-05	0.00127887	0.00119894	0.00111902	0.0021581
OTU_691	691	Actinobacteria	unidentified_Actinobacteria	Corynebacteriales	Mycobacteriaceae	Mycobacterium		0	0	0	0	0	0	0	0	0	0.00399648	0	0	0.000319719	0	7.99297e-05	0.000319719	0	0.00127887	0.000319719	0	7.99297e-05	0	0	0	7.99297e-05	7.99297e-05	0	0.000239789	0	0	0	0	0	0	0	0	0	0.000239789	0.000879226	0.00175845	0.00175845	0.00111902
OTU_174	174	Acidobacteria	Holophagae	Subgroup_7				0	0	0	0	0	0	0	0	0	0	0	0	7.99297e-05	0	0	0	0	7.99297e-05	0.000159859	0	0	0	0	0	0	0	0	0.000159859	0	0	0	0	7.99297e-05	0	0	7.99297e-05	0	0	0.000639437	0.000959156	0.000399648	0.00103909
OTU_124	124	Proteobacteria	Betaproteobacteria	B1-7BS				0	0	0	0	0	0	0	0	0	0	0	0	0	0.000159859	7.99297e-05	0	0	7.99297e-05	0	0	0	0	0	0	0	0	7.99297e-05	0	0	0.000159859	0	0	0	0	0	0	0	0	0.00159859	0.00119894	0.00359683	0.00311726
OTU_144	144	Gemmatimonadetes	unidentified_Gemmatimonadetes	Gemmatimonadales	Gemmatimonadaceae			0	0	0	0	0	0	0	0	0	0	0	0	0	0	0	7.99297e-05	0	0	0.000159859	0	0	0	0	0	0	7.99297e-05	0	0	0	0	0	0	0	0	0	0	0	0.000239789	0.00111902	0.00151866	0.00127887	0.00199824
OTU_515	515	Actinobacteria	unidentified_Actinobacteria	Frankiales	Geodermatophilaceae	Modestobacter		0	0	0	0	0	0	7.99297e-05	0	0.00391655	0.00767325	0	0.000159859	0.000399648	0	7.99297e-05	0	0	7.99297e-05	0	0.000399648	0	0	0	0	0	7.99297e-05	0	7.99297e-05	0	0	0	7.99297e-05	0	0	0	0	0	0	0.000799297	0.000319719	7.99297e-05	0
OTU_3222	3222	Actinobacteria	unidentified_Actinobacteria	Micrococcales	Microbacteriaceae	Microbacterium	Microbacterium_insulae	0	0	0.0127088	0	0	0	0	0	0	7.99297e-05	0	0.000319719	0	0	0	0	0	0	0	0	0	0	0	0	0	0	0	0	0	0	7.99297e-05	0	0	0.000319719	0	0	0	0	0.000159859	0.000239789	0.000239789	0
OTU_343	343	Proteobacteria	Deltaproteobacteria	GR-WP33-30				0	0	0	0	0	7.99297e-05	0	0	0.000719367	0	0	0	0	0	7.99297e-05	0	0	0	0	0	0	0	0	0	0	0	0	0	0	0	7.99297e-05	7.99297e-05	0	0	0	0	0.000239789	7.99297e-05	0.00127887	0.000639437	0.00119894	0.00127887
OTU_392	392	Bacteroidetes	Flavobacteriia	Flavobacteriales	Flavobacteriaceae	Chryseobacterium		7.99297e-05	7.99297e-05	0	0.00671409	7.99297e-05	0	0	0	0.00159859	0	0	0.00159859	0.000159859	0	0.00455599	0	0	7.99297e-05	7.99297e-05	0	0.000319719	0	7.99297e-05	0.000159859	0	0	0	0	0	0	0	0	7.99297e-05	0	0	0	7.99297e-05	0	7.99297e-05	0	0.000159859	7.99297e-05
OTU_550	550	Actinobacteria	unidentified_Actinobacteria	Micromonosporales	Micromonosporaceae			0	0	0	0	0	0	0	0	0	0	0	0	7.99297e-05	0	0.000239789	0.000159859	0	7.99297e-05	0	0.000399648	0.00271761	0	0.000159859	0.000239789	7.99297e-05	0	0.00143873	0.000639437	0.000319719	0	7.99297e-05	7.99297e-05	0.000479578	7.99297e-05	0	0.000399648	0	7.99297e-05	0.000959156	0.000639437	0.000159859	0.000319719
OTU_171	171	Actinobacteria	unidentified_Actinobacteria	Actinomycetales	Actinomycetaceae	Actinomyces	Actinomyces_oris	0	7.99297e-05	0	0	0.00535529	0	0.000399648	0	0	0	0	0.00343698	0.000799297	0.00407641	0	0.000879226	0	0	0	0	0	0	0	0	0	0	0	0	0	0	0.000159859	7.99297e-05	0.000239789	0	7.99297e-05	0	0	0	0	7.99297e-05	0	0
OTU_539	539	Proteobacteria	Alphaproteobacteria	Rhizobiales	Rhodobiaceae			0	0	0	0	0	0	0	0	0	0	0	0	0	0	0	0	0	0	0	0	0	0	0	0	0	0.000319719	0	0	0	0	0	0	0	0	0	0	0	0.000159859	0.000959156	0.00103909	0.00175845	0.000879226
OTU_3898	3898	Proteobacteria	Betaproteobacteria					0	0	0	0	0	0	0	0	0	0	0	0	0	0	0	0	7.99297e-05	0	0	0	0	0	0	0	0	7.99297e-05	0	0	0	0	0	0	0	0	0	0.000159859	7.99297e-05	0	0.000799297	0.000639437	0.000399648	0.000639437
OTU_365	365	Gemmatimonadetes	unidentified_Gemmatimonadetes	AT425-EubC11_terrestrial_group				0	0	0	0	0	0	0	0	0	0	0	0	0	0	7.99297e-05	0	0	0	0	0	0	0	0	0	0	7.99297e-05	0	0	0	0	7.99297e-05	0	0	0	0	0	0	0	0.00175845	0.000719367	0.00119894	0.000799297
OTU_2353	2353	Proteobacteria	Alphaproteobacteria	Sphingomonadales				0	0	0	0	0	0	0	0	0	0	0	0	0	0	0.000159859	0.00191831	0	0	0	0	0	0	0	0	0	0	0	0	0	0	0	0	0	0	0	0	0	0.00927184	0	0.000159859	0	0
OTU_479	479	Actinobacteria	unidentified_Actinobacteria	Propionibacteriales	Nocardioidaceae	Marmoricola		7.99297e-05	0.00759332	0	0	0	0	0	0.00247782	0	0	0	0	0	0	0	0	0	0	0	0	0	0	0	0	0	0	0	0	0	0	0	0	0	0	0	0	0	0	0.000159859	0	0.000319719	0.000239789
OTU_400	400	Proteobacteria	Alphaproteobacteria	Rhizobiales				0	0	0	0	0	0	0	0	0	0	0	7.99297e-05	0	0	7.99297e-05	0	0	0	0	0	0	0	0	7.99297e-05	0	7.99297e-05	0	0	0	0	0	0	0	0	0	0	7.99297e-05	7.99297e-05	0.000639437	0.000559508	0.00111902	0.000879226
OTU_196	196	Proteobacteria	Betaproteobacteria	Burkholderiales	Alcaligenaceae			0	0	0	0	0	0	0	0	0	0	0	0	0	0	0	0	0	0	7.99297e-05	0	0	0	0	0	7.99297e-05	7.99297e-05	0	0	0	0	0	0	0	0	0	0	0	0	0.0013588	0.00111902	0.00175845	0.00119894
OTU_568	568	Gemmatimonadetes	unidentified_Gemmatimonadetes	Gemmatimonadales	Gemmatimonadaceae	Gemmatimonas		0	0	0	0	0	0	0	0	0	0	0	0	0	0	0	0	0	0	0	0	0	0	0	0	0	0	0	0	0	0	0	0	0	7.99297e-05	0	0	0	0	0.00127887	0.00143873	0.000959156	0.00103909
OTU_877	877	Acidobacteria	Subgroup_22					0	0	0	0	0	0	0	0	0	0	0	0	0	0	0	0	0	0	0	0	0	0	0	0	0	0	0	0.000159859	7.99297e-05	7.99297e-05	0	0	0	0	0	0	0	7.99297e-05	0.00111902	0.000639437	0.00127887	0.000959156
OTU_194	194	Actinobacteria	Thermoleophilia	Gaiellales				0	0	0	0	0	0	0	0	0	0	0	0	7.99297e-05	0	0	7.99297e-05	0	0	0	0	0	0	0	0	0	0	0	0	0	0	0	0	0	7.99297e-05	0	0	7.99297e-05	0.000239789	0.00103909	0.000959156	0.000559508	0.000639437
OTU_3387	3387	Gemmatimonadetes	unidentified_Gemmatimonadetes	Gemmatimonadales	Gemmatimonadaceae			0	0	0	0	0	0	0	0	0	0	0	0	0	0	0	0	0	0	0	0	0	0	0	0	0	0	0	0	0	0	0	0	0	0	0	0	0	0	0.00111902	0.000639437	0.000799297	0.00111902
OTU_200	200	Proteobacteria	Gammaproteobacteria	Chromatiales	Chromatiaceae	Rheinheimera	Rheinheimera_soli	0	0.00159859	0	0	0	0	0	0	0	0	0	0	0	0.000479578	0	0	0	0	0	0	0	0	0.000239789	0	0	0	0	0	0	0	0.000319719	0.00623451	0	0	0.000239789	0	0.000319719	0	0	0	0	0
OTU_917	917	Proteobacteria	Betaproteobacteria	Nitrosomonadales	Nitrosomonadaceae			0	0	0	0	0	0	0	0	0	0	0	0	0	0	0	0	0	0	0	0	0	0	0	0	0	0	0	0	7.99297e-05	0	0	0	0	0	0	0	0	0	0.00103909	0.00151866	0.000639437	0.00119894
OTU_907	907	Actinobacteria	Thermoleophilia	Solirubrobacterales	480-2			0	0	0	0.000399648	0	0	0	0	0	0	0	0	7.99297e-05	0	0	0	0	0	0	0	0	0	0	0	0	0	0	7.99297e-05	0	0	0	0.000239789	0	0	0	0	0	0	0.000479578	0.000799297	0.000319719	0.000399648
OTU_1699	1699	Proteobacteria	Deltaproteobacteria	GR-WP33-30				0	0	0	0	0	0	0	0	0	0	0	7.99297e-05	0	0	7.99297e-05	0	0	0	0	0	0	0	0	0	0	0	0	7.99297e-05	0	0	0	0	0	0	0	0	0	0	0.000639437	0.000719367	0.000719367	0.000879226
OTU_257	257	Proteobacteria	Alphaproteobacteria	Sphingomonadales	Sphingomonadaceae	Sphingomonas	Sphingomonas_sp._Cra20	0	0	0	0	0	0	0	0	0	0	0.000239789	7.99297e-05	0.000159859	0	7.99297e-05	0	0	0.000159859	0	0.00455599	0.000239789	0	0	7.99297e-05	0.000399648	0	0	0.000319719	7.99297e-05	0	0	0.000399648	0	0	0	7.99297e-05	0	0	0.000319719	7.99297e-05	7.99297e-05	0
OTU_369	369	Proteobacteria	Alphaproteobacteria	Rhodobacterales	Rhodobacteraceae	Paracocccus		0	0	0	0	0	0	0	0.00855247	0	0	0	0	0	0	0	7.99297e-05	0	0	0	0	0	0	0	0	0	0	0	0	0	0	0	0	0	0	0	0	0	0	0	0	0	0
OTU_441	441	Bacteroidetes	Sphingobacteriia	Sphingobacteriales	Saprospiraceae			0	0	0	0	0	0	0	0	0	0	0	7.99297e-05	0	0	0.000239789	0	0	0	0	0	0	0	0	0	0.000159859	7.99297e-05	0	0	0	0	0	0	0	0	0	7.99297e-05	0	7.99297e-05	0.000479578	0	0.00167852	0.000239789
OTU_440	440	Proteobacteria	Alphaproteobacteria	Rhizobiales				0	0	0	0	0	0	0	0	0	0	0	0	0	0	0	0	0	0	0	0	0	0	0	0	0	7.99297e-05	0	0	0.000159859	0	0	0	0	0	0	0	0	0	0.000239789	0.000159859	7.99297e-05	0.000239789
OTU_1459	1459	Proteobacteria	Alphaproteobacteria	Rhodospirillales	Rhodospirillaceae	Dongia		0	0	0	0	0	0	0	0	0	0	0	7.99297e-05	0	0	0	0	0	0	0	0.000879226	0.000239789	0	0	7.99297e-05	0.000399648	0.000879226	0	0.000879226	7.99297e-05	0	0	0.000159859	0	0	0	0	0	0.00351691	7.99297e-05	7.99297e-05	0.000319719	0
OTU_636	636	Gemmatimonadetes	unidentified_Gemmatimonadetes	Gemmatimonadales	Gemmatimonadaceae			0	0	0	0	0	0	0	0	0	0	0	0	0.000159859	0	7.99297e-05	0	0	0	0	0	0	0	0	0	0	7.99297e-05	0	0	0	0	7.99297e-05	0	0	0	0	0	0	0	0.00127887	0.000479578	0.00103909	0.00111902
OTU_813	813	Actinobacteria	unidentified_Actinobacteria	Micromonosporales	Micromonosporaceae	Virgisporangium		0	0	0	0	0	0	0	0	0	0	0	7.99297e-05	0	0	0	0	0	0	0	0.000239789	0	0	7.99297e-05	0	0	0	0	0	0	0	0	7.99297e-05	0	0	0	0	0	0	0.000639437	0.000639437	0.000399648	0.000479578
OTU_2351	2351	Actinobacteria	Thermoleophilia	Gaiellales				0	0	0	0	0	0	0	0	0	0	0	0	0.00175845	0	0	0	0	0.000159859	0	0	0	0	0	0	0	7.99297e-05	0	0	0	0	0	0	0	0	7.99297e-05	0	0	0	0	7.99297e-05	0	0.000159859
OTU_2334	2334	Proteobacteria	Betaproteobacteria	TRA3-20				0	0	0	0	0	0	0	0	0	0	0	0	0	0	0	0	0	0	0	0	0	0	0	0	0	0	0	0	0	0	0	0	0	0	0	0	0	0	0.000879226	0.000559508	0.00151866	0.000479578
OTU_4901	4901	Proteobacteria	Deltaproteobacteria	Myxococcales				0	0	0	0	0	0	0	0	0	0	0	0	0	7.99297e-05	0	0	0	0	0	0	0	0	0	0	0	0	0.000959156	0	0	0	0	0	0	0	0	0	0	0	0.000399648	0.00103909	0.000559508	0.000159859
OTU_4915	4915	Actinobacteria	Acidimicrobiia	Acidimicrobiales	Acidimicrobiaceae	CL500-29_marine_group		0	0	0	0	0	0	0	0	0	0	0	0	0	0	0	0	0	0	0	0	0	0	0	7.99297e-05	0	0	7.99297e-05	0	0	0	0	0	0	0	0	0	7.99297e-05	0	7.99297e-05	0.000239789	0.000239789	0.000319719
OTU_447	447	Firmicutes	Bacilli	Bacillales	Planococcaceae	Paenisporosarcina		0	0	0	0	0	0	0.000239789	0	0	0	0	0.000479578	0	0	0	0.00127887	0	0.000159859	0	0	0	0.000159859	0	0	7.99297e-05	0	0	0	0	0	0	0.000559508	0	7.99297e-05	0	0	0	0	0.000159859	0.000159859	0.00127887	7.99297e-05
OTU_404	404	Actinobacteria	unidentified_Actinobacteria	Propionibacteriales	Nocardioidaceae	Nocardioides		0	0	0	0	0	0	0	0	0	0	7.99297e-05	0	0.000159859	0	0	0	0	0	0	0	0	0	0	7.99297e-05	0	0	0	0	0	0	0	0	0	7.99297e-05	0	0	0	0	7.99297e-05	0.000159859	0.000159859	0.000319719
OTU_478	478	Verrucomicrobia	OPB35_soil_group					0	0	0	0	0	0	0	0	0	0	0	0	7.99297e-05	0	0	0	0	0	0	0	0	0	0	0	0	0	0	0	0	0	0	0	0	0	0	0	0	0.000159859	0.00119894	0.000719367	0.000879226	0.000559508
OTU_1681	1681	Actinobacteria	unidentified_Actinobacteria	Corynebacteriales	Corynebacteriaceae	Corynebacterium_1		0	0	0	0	0	0	0.000799297	0.00239789	0	0	0	7.99297e-05	7.99297e-05	0	7.99297e-05	0	0	0	0	0.000319719	0.000959156	0	0	0	0	0.00119894	0	0	0	7.99297e-05	7.99297e-05	0	0.000479578	7.99297e-05	0	0	0	0	0	0	0	0
OTU_701	701	Chlorobi	Chlorobia	Chlorobiales	SJA-28			0	0	0	0	0	0	0	0	0	0	0	0	0.000159859	0	0	0	0	0	0	0	0	0	0	0	0	7.99297e-05	0	0	0	7.99297e-05	0	0	0	0	0	0	0	7.99297e-05	0.000639437	0.000399648	0.000159859	0.000479578
OTU_498	498	Proteobacteria	Deltaproteobacteria	Myxococcales				0	0	0	0	0	0	0	0	0	0	0	0	0	0	0	0	0	0	0	0	0	0	0	0	0	0.000159859	0.000159859	0	0	0	0	0	0	0	0	0	0	0	0.000559508	0.000399648	0.000239789	0.000319719
OTU_1184	1184	Proteobacteria	Alphaproteobacteria	Caulobacterales	Caulobacteraceae	Asticcacaulis	Asticcacaulis_biprosthecium	0	0	0	0	0	0	0	0	0	0	0	0	0	0	0	0	0	0	0	7.99297e-05	0	0	0	0.000879226	0.000399648	0	0.000399648	0.000239789	0.000879226	0	0	0.000399648	0	0.000559508	0	0	0	0	0.000239789	0.000479578	0	7.99297e-05
OTU_2007	2007	Actinobacteria	Acidimicrobiia	Acidimicrobiales				0	0	0	0	0	0	0	0	0	0	0	0	0	0	0	0	0	0	0	0	0	0	0	0	0	0	0	0	0	0	0	0	0	0	0	0	0	0	0.000239789	0.000559508	0.000479578	0.000319719
OTU_272	272	Proteobacteria	Gammaproteobacteria	Pseudomonadales	Moraxellaceae			0	0	0	0	0	0	0	0	0	0	0	0	0	0	7.99297e-05	0	0	7.99297e-05	0	0	0.00207817	0	0	0	0	0	0	0	0	0	7.99297e-05	0	0	0	0	0	0	0	0	0	7.99297e-05	0
OTU_667	667	Acidobacteria	unidentified_Acidobacteria	Subgroup_3	unidentified_Acidobacteria	Candidatus_Solibacter		0	0	0	0	0	0	0	0	0	0	0	0	0	0	0	0	0	0	0	0	0	7.99297e-05	0	0	0	0	0	0	0	0	0	0	0	0	0	0	0	7.99297e-05	0.000399648	0.000239789	0.000159859	0
OTU_1153	1153	Gemmatimonadetes	unidentified_Gemmatimonadetes	Gemmatimonadales	Gemmatimonadaceae	Gemmatimonas		0	0	0	0	0	0	0	0	0	0	0	0	0	0	0	0	0	7.99297e-05	0	0	0	0	0	0	0	0	0	0	0	0	0	0	0	0	0	0	0	0	0.000559508	0.000479578	0.000319719	0.000159859
OTU_313	313	Proteobacteria	Deltaproteobacteria	Myxococcales	Haliangiaceae	Haliangium		0	0	0	0	0	0	0	0	0	0	0	0	0	0	0	0	0	0	0	0	0	0	0	0	0	0	0	0	0	0	0	0	0	0	0	0	0	0	0.000399648	0.000639437	0.000559508	0.000399648
OTU_1652	1652	Bacteroidetes	Cytophagia	Cytophagales	Cytophagaceae	Ohtaekwangia		0	0	0	0	0	0	0	0	0	0	0	0	0	0	0	0	0	0	0	0	0	0	0	0	0	0	0	7.99297e-05	0	0	0	0	0	0	0	0	0	7.99297e-05	7.99297e-05	0.000159859	0.00191831	7.99297e-05
OTU_439	439	Proteobacteria	Alphaproteobacteria	Rhodospirillales	MNC12			0	0	0	0	0	0	0	0	0	0	0	0	0	0	0	0	0	0	0	0	0	0	0	0	0	0	0	0	0	0	0	0	0	0	0	0	0	0	0.000399648	0.000159859	0.000239789	0.000479578
OTU_4178	4178	Proteobacteria	Deltaproteobacteria	Myxococcales	BIrii41			0	0	0	0	0	0	0	0	0	0	0	0	0	0	7.99297e-05	0	0	0	0	0	7.99297e-05	0	0	0	0	0	7.99297e-05	0	0	0	0	0	0	0	0	7.99297e-05	7.99297e-05	0	0.000319719	0.000239789	0.00175845	7.99297e-05
OTU_482	482	Actinobacteria	Acidimicrobiia	Acidimicrobiales				0	0	0	0	0	0	0	0	0	0	0	0	0	0	0	0	0	0	0	0	0	0	0	0	0	0	0	0	7.99297e-05	0	0	0	0	0	0	0	7.99297e-05	0	0.000479578	0.000479578	0.000239789	0.000719367
OTU_832	832	Proteobacteria	Alphaproteobacteria	Rhizobiales	Hyphomicrobiaceae	Pedomicrobium		0	0	0	0	0	0	0	0	0	0	0	0	0	0	0	0	0	0	0	0	0	0	0	7.99297e-05	0	7.99297e-05	0	0	0	0	0	0	0	0	0	0	7.99297e-05	0	0.000239789	0.000319719	0.000399648	0.000479578
OTU_390	390	Proteobacteria	Gammaproteobacteria	Chromatiales	Chromatiaceae	Rheinheimera		0	0	0	0	0	0	0	0	0	0	0	0	7.99297e-05	0.00463592	0	0	0	0	0	0	0.000479578	0	0	0	0	0.000159859	7.99297e-05	0	0	0	0	0	0	0	0	0	0	0	0	0	0	0
OTU_315	315	Actinobacteria	unidentified_Actinobacteria	Kineosporiales	Kineosporiaceae	Kineococcus		0	0	0	0	0	0	0	0	0.00487571	0	0	0	0	7.99297e-05	0	0	0	0	0	0	0	0	0	0	0	0	0	0	0	0	0	0	0	0	0	0	0	0	0.000159859	7.99297e-05	0	0
OTU_1015	1015	Proteobacteria	Deltaproteobacteria	GR-WP33-30				0	0	0	0	0	0	0	0	0	0	0	0	0	0	0	0	0	0	0	0	0	0	0	0	0	0	0	0	0	0	0	0	0	0	0	0	0	0	0.000239789	0.000479578	0.000479578	0.000479578
OTU_1444	1444	Actinobacteria	unidentified_Actinobacteria	Propionibacteriales	Nocardioidaceae	Nocardioides		0	0	0	0	0	0	0	0	0	0	0	0	0	0	0.000399648	0	0	0	0	0	0	0	0	0	0	0	0	0	0	0	0	0	0	0	0	0	0	0	0.000639437	0.000479578	0.000639437	0.000239789
OTU_730	730	Actinobacteria	Thermoleophilia	Gaiellales	unidentified_Gaiellales	unidentified_Gaiellales	Gaiella_sp._EBR4-R2	0	0	0	0	0	0	0	0	0	0	0	0	0	0	0	0	0	0	0	0	0	0	0	0	0	0	0	0	7.99297e-05	0	0	0	0	0	0	0	0	0	0.000319719	0.000559508	0.000479578	0.000239789
OTU_300	300	Proteobacteria	Alphaproteobacteria	Caulobacterales	Caulobacteraceae	Asticcacaulis		0	0	0	0	0	0	0	0	0	0	0	7.99297e-05	0	0	0.000319719	7.99297e-05	0	0	0	0.000239789	7.99297e-05	0	0	0	0.000159859	0	0	0.000399648	0.000479578	0	0	0.000159859	0	0	0	0.000319719	0	0	0	0.000159859	0	0.000239789
OTU_615	615	Proteobacteria	Deltaproteobacteria	Myxococcales	Haliangiaceae	Haliangium		0	0	0	0	0	0	0	0	0	0	0	0	0	0	0	0	0	0	0	0	0	0	0	0	0	0	0	0	7.99297e-05	0	0	0	0	0	0	0	0	0	0.000319719	0.000239789	0	0.000399648
OTU_1533	1533	Actinobacteria	Acidimicrobiia	Acidimicrobiales	Iamiaceae	Iamia		0	0	0	0	0	0	0	0	0	0	0	0	7.99297e-05	0	0	0	0	0	0	0	0	0	0	0	0	0	7.99297e-05	0	0	0	0	0	0	0	0	0	0	0	0.000399648	0.000399648	0.000159859	0.000319719
OTU_2458	2458	Proteobacteria	Alphaproteobacteria	Sphingomonadales	Sphingomonadaceae			0	0	0	0	0	0	0	0	0	0	0	0	0	0	0	0	0	0	0	7.99297e-05	0	0	0	0	0.000159859	0	0	0	0	0	0	0	0	0	0	0	0	0	0.000479578	0.000239789	0.000159859	0.000479578
OTU_1174	1174	Actinobacteria	unidentified_Actinobacteria	Frankiales	Sporichthyaceae			0	0	0	0	0	0	0	0	0	0	0	0	0	0	0	0	0	0	0	0	0	0	0	0	0	7.99297e-05	0	7.99297e-05	0	0	0	0	0	0	0	0	0	7.99297e-05	0	0.000239789	0.000319719	0.000239789
OTU_455	455	Proteobacteria	Gammaproteobacteria	KI89A_clade				0	0	0	0	0	0	0	0	0	0	0	0	0	0	0	0	0	0	0	0	0	0	0	7.99297e-05	0	0	0	0	0	0	0	0	0	0	0	0	0	0	0.000399648	0.000239789	0.000799297	7.99297e-05
OTU_2397	2397	Gemmatimonadetes	unidentified_Gemmatimonadetes	Gemmatimonadales	Gemmatimonadaceae	Gemmatimonas		0	0	0	0	0	0	0	0	0	0	0	0	0	0	7.99297e-05	0	0	0	0	0	0	0	0	0	0	0	0	0	0	0	0	0	0	0	0	0	0	0	7.99297e-05	0.000239789	0.000159859	0.000399648
OTU_861	861	Planctomycetes	Pla4_lineage					0	0	0	0	0	0	0	0	0	0	0	0	7.99297e-05	0	0	0	0	0	0	0	0	0	0	0	0	7.99297e-05	0	0	0	0	0	0	0	0	0	0	0	7.99297e-05	0.000879226	0.000559508	0.000399648	0.000319719
OTU_420	420	Armatimonadetes						0	0	0	0	0	0	0	0	0	0	0	0	0	0	0	0	0	0	0	0	0	0	7.99297e-05	0	0	0	0	0	0	0	0	7.99297e-05	0	0	0	0	0	0	0.000159859	0.000479578	7.99297e-05	0.000159859
OTU_1093	1093	Proteobacteria	Betaproteobacteria					0	0	0	0	0	0	0	0	0	0	0	0	7.99297e-05	0	0	0	0	0	0	0	0	0	0	0	0	0	0	0	0	0	0	0	0	0	0	0	0	0	0.000239789	0.000239789	0.000239789	7.99297e-05
OTU_2993	2993	Actinobacteria	Thermoleophilia	Solirubrobacterales				0	0	0	0	0	0	0	0	0	0	0	0	0	0	0	0	0	0	0	0	0	0	0	0	0	0	0	0	0	0	0	0	0	7.99297e-05	0	0	0	0	0.000239789	0.000399648	0.000239789	0.000239789
OTU_3608	3608	Actinobacteria	unidentified_Actinobacteria	Corynebacteriales	Nocardiaceae	Rhodococcus	Rhodococcus_fascians	0	0	0	0	0	0	0	0	0	0	0	0.000399648	0	0	0.000239789	0	0	0	0.000239789	0	0	0	0	0	0.000159859	0	0	0	0	0	0	0.000159859	0	0	0	7.99297e-05	0	0	0.000399648	7.99297e-05	7.99297e-05	0
OTU_386	386	Acidobacteria	Holophagae	Subgroup_10	CA002	unidentified_CA002	Holophaga_sp._WY42	0	0	0	0	0	0	0	0	0	0	0	0	0	0	0	0	0	0	0	0	0	0	0	0	0	0	0	0.000239789	0	0	0	0	0	0	0	0	0	7.99297e-05	0	7.99297e-05	7.99297e-05	0
OTU_556	556	Proteobacteria	Gammaproteobacteria	Xanthomonadales	Xanthomonadaceae			0	0	0	0	0	0	0	0	0	0	0	0	0	0	0	0	0	0	0	0	0	0	0	0	0	0	0	7.99297e-05	0	0	0	0	0	0	0	0	0	0	0.000239789	0.000159859	0.000399648	0.000559508
OTU_661	661	Proteobacteria	Deltaproteobacteria	Myxococcales	Sandaracinaceae			0	0	0	0	0	0	0	0	0	0	0	0	0	0	0	0	0	0	0	0	0	0	0	0	0	0	0	0	0	0	0	0	0	0.000159859	0	0	0	0	0	0	0.000319719	7.99297e-05
OTU_458	458	Proteobacteria	Alphaproteobacteria	Rhizobiales	Aurantimonadaceae	Aureimonas		0	0	0	0	0	0	0	0	0.00119894	0	0	0.000239789	0	0	0	0.000639437	0	0	0	0	0	0	0	7.99297e-05	0	0	0	0	0	0	0	7.99297e-05	0	0	0	0	0	0	7.99297e-05	0.000159859	0	7.99297e-05
OTU_438	438	Proteobacteria	Deltaproteobacteria	Bdellovibrionales	Bdellovibrionaceae	Bdellovibrio		0	0	0	0	0	0	0	0	0	0	0	0	0	0	0	0	0	0	0	0	0	0	0	0	0	0	7.99297e-05	0.000159859	0.000239789	0	0	7.99297e-05	0	0	0	0	0	0	0.000159859	0.000239789	0	7.99297e-05
OTU_322	322	Proteobacteria	Alphaproteobacteria	Caulobacterales	Caulobacteraceae	Asticcacaulis		0	0	0	0	0	0	0	0	0	0	0	0	0	0	0	0	0	0	0	0	0	0	7.99297e-05	0	0	7.99297e-05	0	0	0	0	0.000399648	0.000719367	0	0.00255775	0	0	0	0	0	0	0	0
OTU_606	606	Acidobacteria	unidentified_Acidobacteria	Subgroup_3	unidentified_Acidobacteria	Bryobacter		0	0	0	0	0	0	0	0	0	0	0	0	0	0	0	0	0	0	0	0	0	0	0	0	0	0	0	0	0	0	0	0	0	0	0	0	0	0	0.000319719	0.000239789	0.000239789	0
OTU_475	475	Proteobacteria	Alphaproteobacteria	Sphingomonadales	7B-8			0	0	0	0	0	0	0	0.000159859	0	0	0	0.000239789	0	0	0	0	0	0.00111902	0	0	0	0	0	0	0	0	0	0	0	0	0	0	0	0	0	0	0	7.99297e-05	0	0	0	7.99297e-05
OTU_4313	4313	Proteobacteria	Gammaproteobacteria	Xanthomonadales	Xanthomonadaceae	Lysobacter		0	0	0	0	0	0	0	0	0	0	0	0	0	0	0	0	0	7.99297e-05	0	0	0	0	0	0	0	0	0	0	0	0	0	0	0	0	0	0	0.000159859	0	0.000319719	0.000239789	0.000479578	0.000319719
OTU_748	748	Proteobacteria	Alphaproteobacteria	Rhizobiales	Methylobacteriaceae	Microvirga		0	0	0	0	0	0	0	0	0	0	0	0	0	0	0	0	0	0	0.000159859	0	0	0	0	0	0	0	7.99297e-05	0	0	0	0	0	0	0	0	0	0	0	0.000319719	0.000399648	0.000159859	0.000159859
OTU_1763	1763	Proteobacteria	Alphaproteobacteria	Sphingomonadales	Sphingomonadaceae	Sphingobium		0	0	0	0	0	0	0	0	0	0	0	0	0	0	0	0	0	0	0	0	0	0	0	0	0	0	0	0	0	0	7.99297e-05	0	0	0	0	0	0	0	0.000239789	0.000159859	0	7.99297e-05
OTU_926	926	Proteobacteria	Betaproteobacteria	Nitrosomonadales	Nitrosomonadaceae			0	0	0	0	0	0	0	0	0	0	0	0	0	0	0	0	0	0	0	0	0	0	0	0	0	0	0	0	0	0	0	0	0	0	0	0	0	0	0.000319719	0.000159859	0.000959156	0.000159859
OTU_650	650	Bacteroidetes	Bacteroidia	Bacteroidales	Rikenellaceae	Alistipes		0	0	0	0	0	0	0	0	0	0	0	0	0	0	0	0	0	7.99297e-05	0	0	0	0	0	0	0	0	0	0	0	0	7.99297e-05	0	0	0	0	0	7.99297e-05	0	0	7.99297e-05	7.99297e-05	0
OTU_2518	2518	Proteobacteria	Betaproteobacteria	Burkholderiales	Comamonadaceae	Ramlibacter		0	0	0	0	0	0	0	0	0	0	0	0	0	0	0	0	0	0	0	0	0	0	0	0	0	0	0	0	0	0	0	0	0	0	0	0	0	0	0.000159859	0.000239789	7.99297e-05	0.000559508
OTU_784	784	Proteobacteria	Gammaproteobacteria	Xanthomonadales				0	0	0	0	0	0	0	0	0	0	0	0	0	0	0	0	0	0	0	0	0	0	0	0	0	0	0	0	0	0	0	0	0	0	0	7.99297e-05	0	0	7.99297e-05	0.000239789	0.000319719	0.000239789
OTU_611	611	Proteobacteria	Alphaproteobacteria	Rhodospirillales	unidentified_Rhodospirillales	Geminicoccus		0	0	0	0	0	0	0	0	0	0	0	0	0	0	0	0.0021581	0	0	0	0	0	0	0	0	0	0	0	0	0	0	0	0	0	0	0	0	0	0	7.99297e-05	0	0	7.99297e-05
OTU_551	551	Firmicutes	Clostridia	Clostridiales	Clostridiaceae_1	Clostridium_sensu_stricto_13	Clostridium_subterminale	0	0	0	0	0	0	0	0	0	0	0	0	0.00287747	0	0	0	0	0	0	0	0	0	0	0	0	0	0	0	0	0	0	7.99297e-05	0	0	0	0	0	0	0	0	0	0
OTU_1738	1738	Actinobacteria	unidentified_Actinobacteria	Propionibacteriales	Nocardioidaceae	Nocardioides		0	0	0	0	0	0	0	0	0	0	0	0	0	0	0	0	0	7.99297e-05	0	0	0	0	0	0	0	0	0	0	0	0	0	0	0	0	0	0	0	0	0.000159859	0.000399648	7.99297e-05	0.000159859
OTU_4801	4801	Proteobacteria	Deltaproteobacteria	Myxococcales	Haliangiaceae	Haliangium		0	0	0	0	0	0	0	0	0	0	0	0	0	0	0	0	0	0	0	0	0.000159859	0	0	0	0	0	7.99297e-05	7.99297e-05	0	0	0	0	0	0	0	0	0	0	0.000239789	0.000159859	0.000239789	0.000159859
OTU_851	851	Proteobacteria	Alphaproteobacteria	Rhizobiales	unidentified_Rhizobiales	Bauldia		0	0	0	0	0	0	0	0	0	0	0	0	0	0	0	0	0	0	0	0	0	0	0	0	0	0	0	0	0	0	7.99297e-05	0	0	0	0	0	0	0	0.000159859	0.000159859	0.000479578	0.000159859
OTU_1145	1145	Armatimonadetes						0	0	0	0	0	0	0	0	0	0	0	0	7.99297e-05	0	0	7.99297e-05	0	0	0	0	0	0	0	0	0	7.99297e-05	0	0	0	0	0	0	0	0	0	0	7.99297e-05	0	0.000319719	7.99297e-05	0.000319719	0.000479578
OTU_1380	1380	Fibrobacteres	Fibrobacteria	Fibrobacterales	Fibrobacteraceae	possible_genus_04		0	0	0	0	0	0	0	0	0	0	0	0	0	0	0	0	0	0	0	0	0	0	0	0	0	0	0	0	0	0	0	0	0	0	0	0	0	0	0.000159859	0.000159859	0.000159859	0.000319719
OTU_753	753							0	0	0	0	0	0	0	0	0	0	0	0.000159859	0	0	0	0	0	0	0	0	0	0	0	0	0.00159859	7.99297e-05	0	0.000159859	7.99297e-05	0	0	0	0.000319719	0	0	0	0	0.000159859	7.99297e-05	0	0	0
OTU_448	448	Bacteroidetes	Bacteroidia	Bacteroidales	Rikenellaceae	Alistipes		0	0	0	0	0	0	0	0	0	0	0	0	0	0	0	0	0	0.000159859	0	0	0	0	0	0	0	0	0	0	0	0	7.99297e-05	0	0	0	0	0	0	0	0	0	0	0
OTU_3368	3368	Actinobacteria	unidentified_Actinobacteria	Micrococcales	Micrococcaceae	Arthrobacter	Arthrobacter_sulfureus	0	0	0	0	0	0	0	0	0	0	0	0	0.00255775	0	0	0	0	0	0	0	0	0	0	0	0	0	0	0	0	0	0	0	0	0	0	0	0	0	0	0	0	0
OTU_4436	4436	Actinobacteria	unidentified_Actinobacteria	Propionibacteriales	Nocardioidaceae	Nocardioides		0	0	0	0	0	0	0	0	0.000719367	0	0	0.000159859	0	0	0	0	0	0	0	0	0	0	0	0	0	0	0	0	0	0	0	0	0	0	0	7.99297e-05	0	0	0.000479578	0	0.000159859	7.99297e-05
OTU_1268	1268	Firmicutes	Clostridia	Clostridiales	Clostridiaceae_1	Clostridium_sensu_stricto_1		0	0	0	0	0	0	0	0	0	0	0	0	0	0	0	0	0	0	0	0	0	0	0	0	0	0	0	0	0.000159859	0	0	0	0	0	0	0	0	7.99297e-05	7.99297e-05	0.000239789	0.000239789	7.99297e-05
OTU_1858	1858	Proteobacteria	Deltaproteobacteria	Myxococcales	Haliangiaceae	Haliangium		0	0	0	0	0	0	0	0	0	0	0	0	0	0	0	0	0	0	0	0	0	0	0	0	0	0	0	0	0	0	0	0	0	0	0	0	0	0	0.000639437	0.000239789	0	0.000399648
OTU_537	537	Proteobacteria	Gammaproteobacteria	KI89A_clade				0	0	0	0	0	0	0	0	0	0	0	0	0	0	0	0	0	0	0	0	0	0	0	0	0	0	0	0	0	0	0	0	0	0	0	0	0	0	0.000239789	0.000159859	0.000239789	0.000159859
OTU_1147	1147	Proteobacteria	Alphaproteobacteria	Sphingomonadales	Sphingomonadaceae			0	0	0	0	0	0	0	0	0	0	0	0	0	0	0	0	0	0	0	0	0	0	0	0.000159859	0	0	0	0	0	0	0	0	0	0	0	0	0	0	0.000239789	7.99297e-05	0	7.99297e-05
OTU_1040	1040	Proteobacteria	Deltaproteobacteria	Myxococcales	BIrii41			0	0	0	0	0	0	0	0	0	0	7.99297e-05	0	0	0	7.99297e-05	0	0	0	0	0	0	0	0	0	0	0	0	7.99297e-05	0	0	0	0	0	0	0	0	0	0	7.99297e-05	0.000239789	0.000479578	7.99297e-05
OTU_1497	1497	Proteobacteria	Gammaproteobacteria	Xanthomonadales				0	0	0	0	0	0	0	0	0	0	0	0	0	0	0	0	0	0	0	0.000159859	0	0	0	0	0	0	0	0	0	0	0.000319719	0	0.000159859	0	0	0	0	0	0	0.000159859	0.000399648	0.000159859
OTU_666	666	Proteobacteria	Gammaproteobacteria	Enterobacteriales	Enterobacteriaceae	Buchnera	Buchnera_aphidicola	0	0	0	0	0	0	0	0	0	0	0	0	0.0021581	0	0	0	0	0	0	0	0	0	0	0	0	0	0	0	0	0	0	7.99297e-05	0	0	0	0	0	0	0	0	0	0
OTU_658	658	Proteobacteria	Deltaproteobacteria	Myxococcales	Phaselicystidaceae	Phaselicystis		0	0	0	0	0	0	0	0	0	0	0	0	0	0	0	0	0	0	0	0	0	0	0	0	0	0	0	0	0	0	0	7.99297e-05	0	0	0	0	0	0	7.99297e-05	0	0.000319719	7.99297e-05
OTU_779	779	Proteobacteria	Deltaproteobacteria	Bdellovibrionales	Bdellovibrionaceae			0	0	0	0	0	0	0	0	0	0	0	0	0	0	7.99297e-05	0	0	0	0	0	0	0	0	0	0	0	0	0	0	0	0	0	0	0	0	0	0	0	0.000239789	0.000319719	0.000559508	0.000239789
OTU_1831	1831	Gemmatimonadetes	unidentified_Gemmatimonadetes	AT425-EubC11_terrestrial_group				0	0	0	0	0	0	0	0	0	0	0	0	0	0	0	0	0	0	0	0	0	0	0	0	0	0	0	0	0	0	0	0	0	0	0	0	0	0	7.99297e-05	7.99297e-05	0	0.000159859
OTU_1156	1156	Proteobacteria	Alphaproteobacteria	Sphingomonadales	Sphingomonadaceae	Sphingomonas		0	0	0	0	0	0	0	0	0	0	0	0	0	0	0	0	0	0	0	0	0	0	0	7.99297e-05	0	0	0	0	7.99297e-05	0	0	0	0	7.99297e-05	0	0	0	0	0.000399648	0.000159859	7.99297e-05	7.99297e-05
OTU_4519	4519	Acidobacteria	unidentified_Acidobacteria	Subgroup_6				0	0	0	0	0	0	0	0	0	0	0	0	0	0	0	0	0	0	0	0	0	0	0	0	0	0	0	0	0	0	0	0	0	0	0	0	0	0	0	7.99297e-05	7.99297e-05	0
OTU_823	823	Proteobacteria	Alphaproteobacteria	Sphingomonadales	Plot4-2H12			0	0	0	0	0	0	0	0	0	0	0	0	0	0	0	0	0	0	0	0	0	0	0	0	0	0	0	0	0	0	0	0	0	0	0	0	0	0	7.99297e-05	0	0.000159859	0.000239789
OTU_656	656	Proteobacteria	Deltaproteobacteria	Myxococcales	Haliangiaceae	Haliangium		0	0	0	0	0	0	0	0	0	0	0	0	0	0	0	0	0	0	0	0	0.000159859	0	0	0	0	0	0	0	0	0.000479578	0	7.99297e-05	0.000159859	0.000319719	0	0	7.99297e-05	0	0	7.99297e-05	0	0
OTU_689	689	Acidobacteria	unidentified_Acidobacteria	Subgroup_3	unidentified_Acidobacteria	Bryobacter		0	0	0	0	0	0	0	0	0	0	0	0	0	0	0	0	7.99297e-05	0	0	0	0	0	0	0	0	7.99297e-05	0	0	0	0	0	0	7.99297e-05	0	0	0	0	0	0.000159859	0	7.99297e-05	0
OTU_3489	3489	Proteobacteria	Gammaproteobacteria	Xanthomonadales	Xanthomonadaceae			0	0	0	0	0	0	0	0	0	0	0	0	0	0	0	0	0	0	0	0	0	0	0	0	0.000239789	0	0	0	0	0	0	0	0	0.000159859	0	0	0	0	7.99297e-05	0	0	7.99297e-05
OTU_643	643	Armatimonadetes						0	0	0	0	0	0	0	0	0	0	0	0	0	0	0	0	0	0	0	0	0	0	0	0	0	0	0	0	0	0	0	0	0	0	0	0	0	0	0.000239789	0.000239789	0	0.000239789
OTU_1756	1756							0	0	0	0	0	0	0	0	0	0	0	0	0	0	7.99297e-05	0	0	0.000159859	0	0	0	0	0	0	0	0.000399648	7.99297e-05	0	0	0	0	0	0	0	0	0	0	7.99297e-05	0.000239789	0	0	0.000159859
OTU_1342	1342	Proteobacteria	Deltaproteobacteria	Myxococcales	Haliangiaceae	Haliangium		0	0	0	0	0	0	0	0	0	0	0	0	0	0	0	0	0	0	0	0	0	0	0	0	0	0	0	0	0	0	0	0	0	0	7.99297e-05	0	0	0	7.99297e-05	0	0.000239789	0.000239789
OTU_825	825	Proteobacteria	Alphaproteobacteria	Rhodospirillales	unidentified_Rhodospirillales	Candidatus_Alysiosphaera		0	0	0	0	0	0	0	0	0	0	0	0	7.99297e-05	0	0	0	0	0	0	0	0	0	0	0	0	0	0	0	0	0	0	0	0	0	0	0	0	0	7.99297e-05	7.99297e-05	0.000239789	0.000239789
OTU_1065	1065	Proteobacteria	Deltaproteobacteria	Bdellovibrionales	Bdellovibrionaceae	Bdellovibrio		0	0	0	0	0	0	0	0	0	0	0	0	0	0	0	0	0	0	0	0	0	0	0	0	0	0	0	0	0	0	0	0	0	0	0	0	0	0	0	0	7.99297e-05	0
OTU_1410	1410	Firmicutes	Bacilli	Bacillales	Paenibacillaceae	Paenibacillus		0	0	0	0	0	0	0	0	0	0	0	0	0	0	0	0	0	0	0	0	0	0	0	0	0	0	7.99297e-05	7.99297e-05	0	0	7.99297e-05	0	0	0	0	0	0	0	7.99297e-05	0.000479578	7.99297e-05	7.99297e-05
OTU_637	637	Proteobacteria	Alphaproteobacteria	4-Org1-14				0	0	0	0	0	0	0	0	0	0	0	0	0	0	0	0	0	0	0	0	0	0	0	0	0	0	0	0	0	0	0	0	0	0	0	0	0	0	0	0	0	0
OTU_1043	1043	Proteobacteria	Deltaproteobacteria	Myxococcales	Phaselicystidaceae	Phaselicystis		0	0	0	0	0	0	0	0	0	0	0	0	0	0	0	0	0	0	0	0	0	0	0	0	0	0	0	0	0	0	0	0	0	0	0	0	0	0	7.99297e-05	0	0	0
OTU_1451	1451	Proteobacteria	Alphaproteobacteria	Rickettsiales	Anaplasmataceae	Wolbachia		0	0	0	0	0	0	0	0	0	0	0	0	7.99297e-05	0	7.99297e-05	0	0	7.99297e-05	0.00207817	0	0	0	0	0	0	0	0	0	0	0	0	0	7.99297e-05	0	0	0	0	0	0	0	0	0
OTU_1251	1251	Planctomycetes						0	0	0	0	0	0	0	0	0	0	0	0	0	0	0	0	0	0	7.99297e-05	0	0	0	0	0	0	0	0	0	0	7.99297e-05	0	0	0	0	0	0	0	7.99297e-05	7.99297e-05	7.99297e-05	7.99297e-05	0.000159859
OTU_1276	1276							0	0	0	0	0	0	0	0	0	0	0	0	7.99297e-05	0	0	0	0	0	0	0	0	0	0	0	0	0	0	0	0	0	0	0	0	0	0	0	7.99297e-05	7.99297e-05	0.000159859	7.99297e-05	0	0.000239789
OTU_609	609	Firmicutes	Clostridia	Clostridiales	Ruminococcaceae			0	0	0	0	0	0	0	0	0	0	0	0	0	0	0	0	0	0	0	0	0	0	0	0	0	0	0	0	0	0	7.99297e-05	0	0	0	0	0	0	0	0	7.99297e-05	0	0
OTU_974	974	Chlorobi	Chlorobia	Chlorobiales	SJA-28			0	0	0	0	0	0	0	0	0	0	7.99297e-05	0	0	0	0	0	7.99297e-05	0	0	0	0	0	0	0	0.000159859	0	0	0	0	0.000239789	0	0	0	0	0	0	0	0	7.99297e-05	7.99297e-05	7.99297e-05	7.99297e-05
OTU_836	836	Proteobacteria	Deltaproteobacteria	Myxococcales	Polyangiaceae	Sorangium		0	0	0	0	0	0	0	0	0	0	0	0	0	0	0	0	0	0	0.000159859	0	0	0	0	0	0	0	0	0	0	0	0	0	0	0	0	0	7.99297e-05	0	7.99297e-05	7.99297e-05	7.99297e-05	0.000159859
OTU_1206	1206	Proteobacteria	Gammaproteobacteria					0	0	0	0	0	0	0	0	0	0	0	0	0	0	0	0	0	0	0	0	0	0	0	0	0	0	0	0	0	0	0	0	0	0	0	0	0	0	0.000239789	7.99297e-05	0.000159859	0.000239789
OTU_2879	2879	Proteobacteria	Betaproteobacteria	Methylophilales	Methylophilaceae	Methylotenera		0	0	0	0	0	0	0	0	0	0	0	0	0	0	0	7.99297e-05	0	0	0	0	0	0	0	0	0	0	0	7.99297e-05	0.000479578	0	0	0	0	7.99297e-05	0	0	0	0	0	0	0	0
OTU_1534	1534	Proteobacteria	Betaproteobacteria	Nitrosomonadales	Nitrosomonadaceae	Nitrosomonas		0	0	0	0	0	0	0	0	0	0	0	0	0	0	0	0	0	0	0	0	0	0	0	0	0	0	0	0	0	0	0	0	0	0	0	0	0	0	0.000159859	7.99297e-05	0.000159859	0
OTU_865	865	Bacteroidetes	Sphingobacteriia	Sphingobacteriales	Saprospiraceae			0	0	0	0	0	0	0	0	0	0	0	0	0	0	0	0	0	0	0	0	0	0	0	0	0	0	0	0	0	0	0	0	7.99297e-05	0	0	0	0	0	7.99297e-05	0	0	0
OTU_1445	1445	Proteobacteria	Alphaproteobacteria	Rhodospirillales	Acetobacteraceae			0	0	0	0	0	0	0	0	0	0	0	0	0	0	0	0	0	0	0	0	0	0	0	0	0	0	0	7.99297e-05	0	0	0	0	0	0	0	0	0	0	0.000239789	0.000159859	0.000239789	0.000159859
OTU_2069	2069	Actinobacteria	unidentified_Actinobacteria	Corynebacteriales	Nocardiaceae	Rhodococcus	Rhodococcus_maanshanensis	0	0	0	0	0	0	0	0	0	0	0	0	0	0	0	0	0	0.000159859	0	0	0	0	0	0	0	0	0	0	0	0	0	0	0	0	0	0	0	7.99297e-05	0	7.99297e-05	0	7.99297e-05
OTU_908	908	Acidobacteria	unidentified_Acidobacteria	Subgroup_17				0	0	0	0	0	0	0	0	0	0	0	0	0	0	0	0	0	0	0	0	0	0	0	0	0	0	0	0	0	0	0	0	0	0	0	0	0	0	0	0	0	0
OTU_4866	4866	Proteobacteria	Deltaproteobacteria	Bdellovibrionales	Bdellovibrionaceae	Bdellovibrio		0	0	0	0	0	0	0	0	0	0	0	0	0	0	0	0	0	0	0	0	0	0	0	7.99297e-05	0.000159859	0	0	0	0	0	0	0	0	0	0	0	0	0	7.99297e-05	0	0	7.99297e-05
OTU_2405	2405	Proteobacteria	Alphaproteobacteria	Rhodospirillales				0	0	0	0	0	0	0	0	0	0	0	0	0	0	0	0	0	0	0	0	0	0	0	0	0	0	0	7.99297e-05	0	0	0	0	0	0	0	0	0	0	0.000159859	7.99297e-05	0.000159859	0.000159859
OTU_1638	1638	Proteobacteria	Deltaproteobacteria	Bdellovibrionales	Bdellovibrionaceae			0	0	0	0	0	0	0	0	0	0	0	0	0	0	0	0	0	0	0	0	0	0	0	0	7.99297e-05	0	0	0	0	0	0	0	0	0	0	0	0	0	7.99297e-05	0.000159859	7.99297e-05	0.000239789
OTU_2734	2734	Bacteroidetes	Sphingobacteriia	Sphingobacteriales	Chitinophagaceae	Terrimonas		0	0	0	0	0	0	0	0	7.99297e-05	0	0	0	7.99297e-05	0	0	0	0	0	0	0	0	0	0	0	0	7.99297e-05	0	0	0	0	7.99297e-05	7.99297e-05	0	0	0	0	0	0	0.000159859	0	0	7.99297e-05
OTU_1334	1334	Proteobacteria	Alphaproteobacteria	Rhizobiales				0	0	0	0	0	0	0	0	0	0	0	0	0	0	0	0	0	0	0	0	0	0	0	0	0	0	0	0	0	0	0	0	0	0	0	0	0	0	0	0	0	0
OTU_1084	1084	Chlorobi	Chlorobia	Chlorobiales	OPB56			0	0	0	0	0	0	0	0	0	0	0	0	0	0	0	0	0	0	0	0	0	0	0	0	0	0	0	0	0	0	0	0	0	0	0	0	0	0	0.000159859	0.000159859	0	0.000239789
OTU_2540	2540	Actinobacteria	Acidimicrobiia	Acidimicrobiales				0	0	0	0	0	0	0	0	0	0	0	0	0	0	0	0	0	0	0	0	0	0	0	0	0	0	0	0	0	0	0	0	0	0	0	0	0	0	0.000159859	7.99297e-05	7.99297e-05	0.000559508
OTU_3401	3401	Proteobacteria	Deltaproteobacteria	Myxococcales				0	0	0	0	0	0	0	0	0	0	0	0	0	0	7.99297e-05	0	0	0	0	0	0	0	0	0	0	0	0	0	0	0	0	0	0	0	0	0	0	0	0.000159859	0.000239789	0.000559508	7.99297e-05
OTU_1228	1228	Proteobacteria	Alphaproteobacteria	Rhodobacterales	Rhodobacteraceae	Rubellimicrobium		0	0	0	0	0	0	0	0	0	0	0	0	0	0	0	0	0	0	0	0	0	0	0	7.99297e-05	0	0	0	0.000159859	0	0	0	0	0	0	0	0	0	0	0	0	0	0
OTU_757	757	Proteobacteria	Deltaproteobacteria	Bdellovibrionales	Bdellovibrionaceae	Bdellovibrio	Bdellovibrio_sp._JSF2	0	0	0	0	0	0	0	0	0	0	0	0	0	0	0	0	0	0	0	0	0	0	0	0	0	0	0	0	7.99297e-05	0	0	7.99297e-05	0	0	0	0	0	0	0	7.99297e-05	0	0.000159859
OTU_698	698	Gemmatimonadetes	unidentified_Gemmatimonadetes	Gemmatimonadales	Gemmatimonadaceae			0	0	0	0	0	0	0	0	0	0	0	0	0	0	0	0	0	0	0	0	0	0	0	0	0	0.000159859	0	0	0	0	0	0	0	0	0	0	0	0	0.000239789	0.000159859	0.000159859	0.000239789
OTU_1212	1212	Proteobacteria	Alphaproteobacteria					0	0	0	0	0	0	0	0	0	0	0	0	0	0	0	0	0	0	0	0	0	0	0	0	0	7.99297e-05	0	0	0	0	0	0	0	0	0	0	0	7.99297e-05	0	0	0.000159859	0.000159859
OTU_749	749	Planctomycetes	vadinHA49					0	0	0	0	0	0	0	0	0	0	0	0.000159859	0	0	0	0	0	0	0	0	0	0	0	0	0	0	0	0	7.99297e-05	0	0	0	0	0	0	0	7.99297e-05	0.000159859	0.000159859	7.99297e-05	7.99297e-05	0.000159859
OTU_706	706	Proteobacteria	Alphaproteobacteria	Rhodospirillales	AKYH478			0	0	0	0	0	0	0	0	0	0	0	0	0	0	0	0	0	0	0	0	0	0	0	0	0	0	0	0	0	0	0	0	0	0	0	0	0	0	0	0	7.99297e-05	0
OTU_1275	1275	Elusimicrobia	unidentified_Elusimicrobia	Lineage_IIb				0	0	0	0	0	0	0	0	0	0	0	0	0	0	0	0	0	0	0	0	0	0	0	0	0	0	0	0	0	0	0	0	0	0	0	0	0	0	0.000239789	0	7.99297e-05	0.000239789
OTU_842	842	Proteobacteria	Deltaproteobacteria	Myxococcales	Sandaracinaceae			0	0	0	0	0	0	0	0	0	0	0	0	0	0	0	0	0	0	0	0	0	0	0	0	0	0	0	0	0	0	0	0	0	0	0	0	0	0	0	0	7.99297e-05	0
OTU_839	839	Bacteroidetes	Bacteroidia	Bacteroidales	Rikenellaceae	Alistipes		0	0	0	0	0	0	0	0	0	0	0	0	0	0	0	0	0	0.000159859	0	0	0	0	0	0	0	0	0	0	0	0	0	0	0	0	0	0	0	0	0	0	0	0
OTU_892	892	Proteobacteria	Alphaproteobacteria	Rhizobiales				0	0	0	0	0	0	0	0	0	0	0	0	0	0	0	0	0	0	0	0	0	0	0	0	0	0	0	0	0	0	0	0	0	0	0	0	7.99297e-05	0	0.000159859	0	7.99297e-05	0.000159859
OTU_1002	1002	Proteobacteria	Alphaproteobacteria	Rhodospirillales	Rhodospirillaceae			0	0	0	0	0	0	0	0	0	0	0	0	0	0	0	0	0	0	0	0	0	0	0	0	0	0	0	0	0	0	0	0	0	0	0	0	0	0	0.000159859	0.000159859	0.000159859	0
OTU_1427	1427	Bacteroidetes	Cytophagia	Cytophagales	Cytophagaceae			0	0	0	0	0	0	0	0	0	0	0	0	0	0	0	0	0	0	7.99297e-05	0	0	0	0	0	0	0	0	0	0	0	0	0	0	0	0	0	0	0	0	7.99297e-05	0.000319719	7.99297e-05
OTU_1454	1454	Gemmatimonadetes	unidentified_Gemmatimonadetes	unidentified_Gemmatimonadetes	S0134_terrestrial_group			0	0	0	0	0	0	0	0	0	0	0	0	0	0	0	0	0	0	0	0	0	0	0	0	0	0	0	0	0	0	0	0	0	0	0	0	0	0	0.000239789	7.99297e-05	0.000159859	7.99297e-05
OTU_1563	1563	Gemmatimonadetes	unidentified_Gemmatimonadetes	Gemmatimonadales	Gemmatimonadaceae			0	0	0	0	0	0	0	0	0	0	0	0	0	0	0	0	0	0	0	0	0	0	0	0	0	0	0	0	0	0	0	0	0	0	0	0	0	0	0.000159859	0.000319719	7.99297e-05	7.99297e-05
OTU_2379	2379	Bacteroidetes	Sphingobacteriia	Sphingobacteriales	Saprospiraceae			0	0	0	0	0	0	0	0	0	0	0	0	0	0	0	0	0	7.99297e-05	0	0	0	7.99297e-05	0	0	0	0	7.99297e-05	0	0	0	0	0	0	0	0	0	0	0	0	0	0	7.99297e-05
OTU_1273	1273	Proteobacteria	Deltaproteobacteria					0	0	0	0	0	0	0	0	0	0	0	0	0	0	0	0	0	0	0	0	0	0	0	0	0	0	0	0	0	0	0	0	0	0	0	0	0	0	0	7.99297e-05	0	0
OTU_4536	4536	Proteobacteria	Gammaproteobacteria	Xanthomonadales	Xanthomonadaceae			0	0	0	0	0	0	0	0	0	0	0	0	0	0	0	0	0	0	0	0	0	0	0	0	0	0	0	0	0	0	0	0	0	0	0	0	0	0	0.000239789	0	0	0.000239789
OTU_3994	3994							0	0	0	0	0	0	0	0	0	0	0	0	0	0	0	0	0	0	0	0	0	0	0	0	0	0	0	0	0	0	0	0	7.99297e-05	0	0	0	0	0	0	7.99297e-05	0.000159859	7.99297e-05
OTU_1110	1110	Proteobacteria	Deltaproteobacteria	Myxococcales	Polyangiaceae	Sorangium		0	0	0	0	0	0	0	0	0	0	0	0	0	0	0	0	0	0	0	0	0	0	0	0	0	0	0	0	0	0	0	0	7.99297e-05	0	0	0	0	0	7.99297e-05	0	0	7.99297e-05
OTU_1785	1785	Proteobacteria	Deltaproteobacteria					0	0	0	0	0	0	0	0	0	0	0	7.99297e-05	0	0	0	0	0	0	0	0	0	0	0	0	0	7.99297e-05	0	0	0	0	0	0	0	0	0	0	0	0	0.000159859	7.99297e-05	0	0.000239789
OTU_2954	2954	Proteobacteria	Alphaproteobacteria	Sphingomonadales	Sphingomonadaceae	Novosphingobium		0	0	0	0	0	0	0	0	0	0	0	0	0	0	0	0	0	0	0	0	0	0	0	0	0	0	0	0	0	0	0	0	7.99297e-05	0	0	0	0	0	0	0	0	0
OTU_1813	1813	Armatimonadetes						0	0	0	0	0	0	0	0	0	0	0	0	0	0	7.99297e-05	0	0	7.99297e-05	0	0	0	0	0	0	0	0	0	0	0	0	0	0	0	0	0	0	0	0	0	0	7.99297e-05	0.000159859
OTU_2136	2136	Actinobacteria	unidentified_Actinobacteria	Frankiales	Frankiaceae	Jatrophihabitans		0	0	0	0	0	0	0	0	0	0	0	0	0	0	0	0	0	0	0	0	0	0.000239789	0	0	0	0	0	0	0	0	0	0	0	0	0	0	0	0	7.99297e-05	7.99297e-05	7.99297e-05	0
OTU_2982	2982	Proteobacteria	Alphaproteobacteria	Sphingomonadales	Sphingomonadaceae			0	0	0	0	0	0	0	0	0	0	0	0	0	0	0	0	0	0	0	0	0	0	0	0	0	0	0	0	0	0	0	0.000159859	0	0	0	0	0	0	0	0	0	7.99297e-05
OTU_2013	2013	Proteobacteria	Deltaproteobacteria	Sh765B-TzT-29				0	0	0	0	0	0	0	0	0	0	0	0	0	0	0.000159859	0	0	0	0	0.000479578	0	0	0	0	0	0	0	0	0	0	0	0	0	0	0	0	0	0	7.99297e-05	0	0.000159859	7.99297e-05
OTU_985	985	Proteobacteria	Deltaproteobacteria	Oligoflexales				0	0	0	0	0	0	0	0	0	0	0	0	0	0	0	0	0	0	0	0	0	0	0	0	0	0	0	0	0	0	7.99297e-05	0	0	0	0	0	0	0	7.99297e-05	0	0	0.000239789
OTU_1523	1523	Proteobacteria	Deltaproteobacteria	Bdellovibrionales	Bdellovibrionaceae	Bdellovibrio	Bdellovibrio_sp._JSF2	0	0	0	0	0	0	0	0	0	0	0	0	0	0	0	0	0	0	0	0	0	0	0	0	0	0	0	0	0	0	0	0	0	0	0	0	0	0	0.000159859	0.000159859	0	7.99297e-05
OTU_1723	1723	Armatimonadetes						0	0	0	0	0	0	0	0	0	0	0	0	0	0	0	0	0	0	0	0	0	0	0	0	0	7.99297e-05	0	0	0	0	0	0	0	0	0	0	0	0	0.000159859	0.000159859	0	7.99297e-05
OTU_2010	2010	Proteobacteria	Deltaproteobacteria	Bdellovibrionales	Bdellovibrionaceae	Bdellovibrio		0	0	0	0	0	0	0	0	0	0	0	0	0	0	0	0	0	0	0	0	0	0	0	0	0	0	0	7.99297e-05	0	0	0	0	0	0	0	0	0	0	7.99297e-05	0.000159859	7.99297e-05	7.99297e-05
OTU_1783	1783	Proteobacteria	Alphaproteobacteria	Sphingomonadales	Erythrobacteraceae	Altererythrobacter		0	0	0	0	0	0	0	0	0	0	0	0	0	0	0	0	0	0	0	0	0	0	0	0	0	0	0	0	0	0	0	0	0	0	0	0	0	0	0	0	0	0
OTU_1751	1751	Proteobacteria						0	0	0	0	0	0	0	0	0	0	0	0	0	0	0	0	0	0	0	0	0	0	0	7.99297e-05	0	0	7.99297e-05	0	0	0	0	0	0	0	0.000159859	0	0	7.99297e-05	0	0	0	7.99297e-05
OTU_2187	2187	Proteobacteria	Deltaproteobacteria	Myxococcales				0	0	0	0	0	0	0	0	0	0	0	0	0	0	0	0	0	0	0	0	0	0	0	0	0	0	0	0	0	0	0	0	0	0	0	0	0	0	0.000159859	0.000159859	0	7.99297e-05
OTU_3308	3308	Proteobacteria	Alphaproteobacteria	Rhodospirillales	Rhodospirillaceae			0	0	0	0	0	0	0	0	0	0	0	0	0	0	0	0	0	0	0	0	0	0	0	0	0	0	0	0	0	0	0	0	0	0	0	0	0	0	7.99297e-05	0	7.99297e-05	0
OTU_1549	1549	Gemmatimonadetes	unidentified_Gemmatimonadetes	unidentified_Gemmatimonadetes	S0134_terrestrial_group			0	0	0	0	0	0	0	0	0	0	0	0	0	0	0	0	0	0	0	0	0	0	0	0	0	0	0	0	0	0	0	0	0	0	0	0	0	0	0	7.99297e-05	0	7.99297e-05
OTU_3879	3879	Gemmatimonadetes	unidentified_Gemmatimonadetes	unidentified_Gemmatimonadetes	S0134_terrestrial_group			0	0	0	0	0	0	0	0	0	0	0	0	7.99297e-05	0	0	0	0	0	0	0	0	0	0	0	0	0	0	0	0	0	0	0	0	0	0	0	0	0	7.99297e-05	0.000239789	0	7.99297e-05
OTU_1818	1818	Gemmatimonadetes	unidentified_Gemmatimonadetes	AT425-EubC11_terrestrial_group				0	0	0	0	0	0	0	0	0	0	0	0	0	0	0	0	0	0	0	0	0	0	0	0	7.99297e-05	0	0	0	0	0	0	0	0	0	0	0	0	0	7.99297e-05	7.99297e-05	7.99297e-05	0
OTU_1482	1482	Bacteroidetes	Cytophagia	Cytophagales	Cytophagaceae	Rhodocytophaga		0	0	0	0	0	0	0	0	0	0	0	0	0	0	0	0	0	0	0	0	0	0	0	0	0	0	0	0	0	0	0	0	0	0	0	0	0	0	0	0	0	0
OTU_1728	1728	Bacteroidetes	Sphingobacteriia	Sphingobacteriales	Sphingobacteriaceae	Pedobacter		0	0	0	0	0	0	0	0	7.99297e-05	0	0	0	0.000159859	0	0	0	0	0	0	7.99297e-05	0	0	0	0	0.000319719	0	0	0	7.99297e-05	0	0	7.99297e-05	0	0	0	0	0	0	0	0	0	7.99297e-05
OTU_2227	2227	Proteobacteria	Deltaproteobacteria	Myxococcales	Polyangiaceae	Sorangium		0	0	0	0	0	0	0	0	0	0	0	0	0	0	0	0	0	0	0	0	0	0	0	0	0	0	0	0	7.99297e-05	0	0	0	0	0	0	0	0	0	7.99297e-05	7.99297e-05	0	7.99297e-05
OTU_1489	1489	Proteobacteria	Deltaproteobacteria	Myxococcales				0	0	0	0	0	0	0	0	0	0	0	0	0	0	0	0	0	0	0	0	0	0	0	0	0	0	0	0	0	0	0	0	0	0	0	0	0	0	7.99297e-05	0	0	7.99297e-05
OTU_4730	4730	Bacteroidetes	Cytophagia	Cytophagales	Cytophagaceae			0	0	0	0	0	0	0	0	0	0	0	0	0	0	0	0	0	0	0	0	0	0	0	0	0	0	0	0.000159859	0	0	7.99297e-05	0.000159859	0	0	0	0.000159859	0	0	0	0	7.99297e-05	0
OTU_2590	2590	Acidobacteria	unidentified_Acidobacteria	Subgroup_4	43063			0	0	0	0	0	0	0	0	0	0	0	0	0.000159859	0	0	0	0	0	0	0	0	0	0	0	0	0	7.99297e-05	0	0	0	0	0	0	0	0	0	0	0	0	0	0	0
OTU_3083	3083	Proteobacteria	Betaproteobacteria	Nitrosomonadales	Nitrosomonadaceae			0	0	0	0	0	0	0	0	0	0	0	0	0	0	0	0	0	0	0	0	0	0	0	0	0	0	0	0	0	0	0	0	0	0	0	0	0	0	0	0	0.000239789	0.000239789
OTU_838	838	Proteobacteria	Alphaproteobacteria	Rickettsiales	Rickettsiaceae			0	0	0	0	0	0	0	0	0	0	0	0	0	0	0	0	0	0	0	0	0	0	0	0	0	0	0	0	0	0	0	0	0	0	0	0	0	0	0.000959156	7.99297e-05	0	0
OTU_1088	1088	Bacteroidetes	Cytophagia	Order_II	Rhodothermaceae			0	0	0	0	0	0	0	0	0	0	0	0	0	0	0	0	0	0	0	0	0	0	0	0	0	0	0	0	0	0	0	0	0	0	0	0	0	0	0	0	7.99297e-05	7.99297e-05
OTU_3906	3906	Proteobacteria	Deltaproteobacteria	Oligoflexales				0	0	0	0	0	0	0	0	0	0	0	0	0	0	7.99297e-05	0	0	0	0	0	0	0	0	0	0	0	0	0	7.99297e-05	0	0	0	0	0	0	0	0	7.99297e-05	0	7.99297e-05	0	0
OTU_1117	1117	Acidobacteria	Holophagae	Subgroup_7				0	0	0	0	0	0	0	0	0	0	0	0	0	0	0	0	0	0	0	0	0	0	0	0	0	0	0	0	0	0	0	0	0	0	0	0	0	0	7.99297e-05	0	0.000319719	7.99297e-05
OTU_1842	1842	Proteobacteria						0	0	0	0	0	0	0	0	0	0	0	0	0	0	0	0	0	0	0	0	0	0	0	0	0	0	0	0	0	0	0	0	0	0	0	0	0	0	0.000159859	0	0	0
OTU_933	933	Bacteroidetes	Cytophagia	Cytophagales	Cytophagaceae			0	0	0	0	0	0	0	0	0	0	0	0	0	0	0	0	0	0	0	0	0	0	0	0	0	0	0	0	0	7.99297e-05	0	0	0	0	0	0	0	0	0	0	0	7.99297e-05
OTU_763	763	Proteobacteria	Alphaproteobacteria	Rhizobiales	MNG7			0	0	0	0	0	0	0	0	0	0	0	0	0	0	0	0	0	0	0	0	0	0	0	0	0	0	0	0	0	0	0	0	0	0	0	0	0	0	0	7.99297e-05	0	0
OTU_1531	1531	Proteobacteria	Deltaproteobacteria	Myxococcales	Haliangiaceae	Haliangium		0	0	0	0	0	0	0	0	0	0	0	0	0	0	0	0	0	0	0	0	0	0	0	0	0	0	0	0	7.99297e-05	0	0	0.000159859	0	0	0	0	0	7.99297e-05	7.99297e-05	0	7.99297e-05	0
OTU_1318	1318	Acidobacteria	unidentified_Acidobacteria	Subgroup_4	43063			0	0	0	0	0	0	0	0	0	0	0	0	0	0	0	0	0	0	0	0	0	0	0	0	0	0	0	0	0	0	0	0	0	0	0	0	0	0	0	0	0	0
OTU_2967	2967	Proteobacteria	Deltaproteobacteria	Bdellovibrionales	Bacteriovoracaceae	Peredibacter		0	0	0	0	0	0	0	0	0	0	0	0	0	0	0	0	0	0	0	0	0	0	0	0	0	0	0	0	0	0	0	0	0	0	0	0	0	0	0	0	7.99297e-05	0
OTU_4226	4226	Planctomycetes	vadinHA49					0	0	0	0	0	0	0	0	0	0	0	0	0	7.99297e-05	0	0	0	0	0	0	7.99297e-05	0	0	0	0	0	0	0	0	0	0	0	0	0	0	0	0	0	0.000319719	0	7.99297e-05	0
OTU_3957	3957	Proteobacteria	Alphaproteobacteria	Rickettsiales	SM2D12			0	0	0	0	0	0	0	0	0	0	0	0	0	0	0	0	0	0	0	0	0	0	0	0	0	0	0	0	0	0	0	0	0	0	0	0	0	0	0	0	0	7.99297e-05
OTU_2198	2198	Proteobacteria	Deltaproteobacteria	Oligoflexales				0	0	0	0	0	0	0	0	0	0	0	0	0	0	0	0	0	0	0	0	0	0	0	0	0	0	0	0	0	0	0	0.000159859	0	0	0	0	0	0	7.99297e-05	0.000159859	7.99297e-05	0.000159859
OTU_1032	1032	Proteobacteria	Gammaproteobacteria	Xanthomonadales	Xanthomonadaceae			0	0	0	0	0	0	0	0	0	0	0	0	0	0	0	0	0	0	0	0	0	0	0	0	0	0	0	0	0	0	0	0	0	0	0	0	0	0	7.99297e-05	0.000159859	0	7.99297e-05
OTU_1574	1574	Armatimonadetes						0	0	0	0	0	0	0	0	0	0	0	0	0	0	0	0	0	0	0	0	0	0	0	0	0	0.000159859	0	0	0	0	0	0	0	0	0	0	0	0	7.99297e-05	0.000159859	0	0.000159859
OTU_1082	1082	Proteobacteria	Deltaproteobacteria	Desulfuromonadales	GR-WP33-58			0	0	0	0	0	0	0	0	0	0	0	0	0	0	0	0	0	0	0	0	0	0	0	0	0	0	0	0	0	0	0	0	0	0	0	0	0	0	0	7.99297e-05	0.000239789	7.99297e-05
OTU_2682	2682	Proteobacteria	Alphaproteobacteria	Rhodospirillales	Rhodospirillaceae	Skermanella		0	0	0	0	0	0	0	0	0	0	0	0	0	0	0	0	0	0	0	0	0	0	0	7.99297e-05	0	0	0	0	0	0	0	0	0	0	0	0	0	0	0	0	0	7.99297e-05
OTU_4559	4559	Proteobacteria	Alphaproteobacteria	Rhodobacterales	Rhodobacteraceae	Amaricoccus		0	0	0	0	0	0	0	0	0	0	0	0	0	0	0	0	0	0	0	0	0	0	0	0	0	0	0	0	0	0	0	0	0	0	0	0	0	0	0	0	7.99297e-05	7.99297e-05
OTU_1018	1018	Proteobacteria	Alphaproteobacteria	Rhodospirillales	Acetobacteraceae	Roseomonas	Roseomonas_frigidaquae	0	0	0	0	0	0	0	0	0	0	0	0	0	0	0	0	0	0	0	0	0	0	0	0	0	0	0	0	0	0	0	0	0	0	0	7.99297e-05	0	0	0	0	0	0
OTU_1337	1337	Bacteroidetes	Bacteroidia	Bacteroidales				0	0	0	0	0	0	0	0	0	0	0	0	0	0	0	0	0	0	0	0	0	0	0	0	0	0	0	0	0	7.99297e-05	0	0	0	0	0	0	0	0	0	0	0.000479578	0
OTU_1791	1791	Planctomycetes	OM190					0	0	0	0	0	0	0	0	0	0	0	0	0	0	0	0	0	0	0	0	0	0	0	0	0	0	0	0	0	0	0	0	0	0	0	0	0	0	7.99297e-05	0	0.000239789	0.000159859
OTU_1266	1266	Bacteroidetes	Sphingobacteriia	Sphingobacteriales	Chitinophagaceae	Parafilimonas		0	0	0	0	0	0	0	0	0	0	0	0	0	0	0	0.000239789	0	0	0	0	0	0	0	0	7.99297e-05	0	0	0	0	0	0	0	0	0	0	0	0	0	0.000159859	0	0	0
OTU_1383	1383	Actinobacteria	Acidimicrobiia	Acidimicrobiales				0	0	0	0	0	0	0	0	0	0	0	0	0	0	0	0	0	0	0	0	0	0	0	0	0	0	0	0	0	0	0	0	0	0	0	0	0	0	0	7.99297e-05	7.99297e-05	0
OTU_1045	1045	Acidobacteria	unidentified_Acidobacteria	Subgroup_3	unidentified_Acidobacteria	Bryobacter		0	0	0	0	0	0	0	0	0	0	0	0	0	0	0	0	0	0	0	0	0	0	0	0	0	0	0	0	0	0	0	0	0	0	0	0	0	0	0	0	0	0
OTU_4074	4074	Proteobacteria	Alphaproteobacteria	Rhizobiales				0	0	0	0	0	0	0	0	0	0	0	0	0	0	0	0	0	0	0	0	0	0	0	0	0	0	0	0	0	0	0	0	0	0	0	0	0	0	0	0	0	0
OTU_1871	1871	Proteobacteria	Deltaproteobacteria	Oligoflexales				0	0	0	0	0	0	0	0	0	0	0	0	7.99297e-05	0	0	0	0	0	0	0	0	0	0	0	0	0	0	7.99297e-05	0	0	0	0	0	0	0	0	0	0	0	0	7.99297e-05	0
OTU_1081	1081	Bacteroidetes	Sphingobacteriia	Sphingobacteriales	NS11-12_marine_group			0	0	0	0	0	0	0	0	0	0	0	0	0	0	0	0	0	0	0	0	0	0	0	0	0	0	0	0	0	0	0	0	0	0	0	0	0	0	0	0	7.99297e-05	7.99297e-05
OTU_1292	1292	Proteobacteria	Alphaproteobacteria	Rhizobiales	Xanthobacteraceae			0	0	0	0	0	0	0	0	0	0	0	0	0	0	0	0	0	0	0	0	0	0	0	0	0	0	0	0	0	0	0	0	0	0	0	0	0	0	0	0	7.99297e-05	0
OTU_1479	1479	Proteobacteria	Alphaproteobacteria	Rhodospirillales	Acetobacteraceae			0	0	0	0	0	0	0	0	0	0	0	0	0	0	0	0	0	0	0	0	0	0	0	0	0	0	0	0	0	0	0	0	0	0	0	0	0	0	0	0	0	0.000239789
OTU_2005	2005	Proteobacteria	Deltaproteobacteria	Bdellovibrionales	Bdellovibrionaceae	Bdellovibrio		0	0	0	0	0	0	0	0	0	0	0	0	0	0	7.99297e-05	0	0	0	0	0	0	0	0	0	0	0	0	0	0	0	0	0	0	0	0	0	0	0	0	0	0.000159859	0
OTU_1134	1134	TM6						0	0	0	0	0	0	0	0	0	0	0	0	0	0	0	0	0	0	0	0	0	0	0	0	0	0	0	0	0	0	0	0	0	0	0	0	0	0	7.99297e-05	0	0	0
OTU_1430	1430	Proteobacteria	Alphaproteobacteria	Rhodospirillales	Rhodospirillaceae			0	0	0	0	0	0	0	0	0	0	0	0	0	0	0	0	0	0	0	0	0	0	0	0	0	0	0	0	0	0	0	0	0	0	0	0	0	0	0	0	0	0
OTU_1594	1594	Proteobacteria	Deltaproteobacteria	Myxococcales	Cystobacteraceae	Anaeromyxobacter		0	0	0	0	0	0	0	0	0	0	0	0	0	0	0	0	0	0	0	0	0	0	0	0	0	0	0	0	0	0	0	0	0	0	0	0	0	0	7.99297e-05	7.99297e-05	0	7.99297e-05
OTU_1530	1530	Proteobacteria	Alphaproteobacteria	Rhizobiales	unidentified_Rhizobiales	Bauldia		0	0	0	0	0	0	0	0	0	0	0	0	0	0	0	0	0	0	0	0	0	0	0	0	0	0	0	0	0	0	0	0	0	0	0	0	0	0	0	0	0	0
OTU_3090	3090	Proteobacteria	Deltaproteobacteria	Oligoflexales	Oligoflexaceae			0	0	0	0	0	0	0	0	0	0	0	0	7.99297e-05	0	0	0	0	0	0	0	0	0	0	0	0	0	0	0	0	0	0	0	0	0	0	0	0	0	0	0.000159859	0	0
OTU_4295	4295	Verrucomicrobia	OPB35_soil_group					0	0	0	0	0	0	0	0	0	0	0	0	0	0	0	0	0	0	0	0	0	0	0	0	0	0	0	0	0	0	0	0	0	0	7.99297e-05	0	0	0	7.99297e-05	0	0	7.99297e-05
OTU_1401	1401	Bacteroidetes	Cytophagia	Order_II	Rhodothermaceae			0	0	0	0	0	0	0	0	0	0	0	0	0	0	0.000159859	0	0	0	0	0	0	0	0	0	0	0	0	0	0	0	0	0	0	0	0	0	0	0	0	0.000159859	0	0.000159859
OTU_1457	1457	Armatimonadetes						0	0	0	0	0	0	0	0	0	0	0	0	0	0	0	0	0	0	0	0	0	0	0	0	7.99297e-05	0	0	0	0	0	0	0	0	0	0	0	0	7.99297e-05	0	0	0	0.000239789
OTU_3015	3015	Verrucomicrobia	Verrucomicrobiae	Verrucomicrobiales	Verrucomicrobiaceae			0	0	0	0	0	0	0	0	0	0	0	0	0	0	0	0	0	0	0	0	0	0	0	0	0	0	0	0	0	0	0	0	0	0	0	0	0	0	0	0	0	0
OTU_887	887	Planctomycetes	Phycisphaerae	Phycisphaerales	Phycisphaeraceae	SM1A02		0	0	0	0	0	0	0	0	0	0	0	0	0	0	0	0	0	0	7.99297e-05	0	0	0	0	0	7.99297e-05	0	0	7.99297e-05	7.99297e-05	0	0	0	0	0	0	0	0	7.99297e-05	0	0	0	7.99297e-05
OTU_1405	1405	Chloroflexi	Ktedonobacteria	C0119				0	0	0	0	0	0	0	0	0	0	0	0	0	0	0	0	0	0	0	0	0	0	0	0	0	0	0	0	0	0	0	0	0	0	0	0	0	0	0.000239789	0.000159859	0	0.000159859
OTU_3054	3054	Actinobacteria	Acidimicrobiia	Acidimicrobiales				0	0	0	0	0	0	0	0	0	0	0	0	0	0	0	0	0	0	0	0	0	0	0	0	0	7.99297e-05	0	0	0	0	0	0	0	0	0	0	0	0	0	0	0	0
OTU_1848	1848	Proteobacteria	Alphaproteobacteria	Rickettsiales	SM2D12			0	0	0	0	0	0	0	0	0	0	0	0	0	0	0	0	0	0	0	0	0	0	0	0	7.99297e-05	0	0	0	0	0	0	0	0	0	0	0	0	0	7.99297e-05	7.99297e-05	0	0.000159859
OTU_2001	2001	Proteobacteria	TA18					0	0	0	0	0	0	0	0	0	0	0	0	0	0	0	0	0	0	0	0	0	0	0	0	0	0	0	0	0	0	0	0	0	0	0	0	0	0	0	7.99297e-05	0.000159859	7.99297e-05
OTU_1861	1861	Planctomycetes	OM190	unidentified_OM190	unidentified_OM190	unidentified_OM190	planctomycete_A-2	0	0	0	0	0	0	0	0	0	0	0	0	0	0	0	0	0	0	0	0	0	0	0	0	0	0.000159859	0	0	0	0	0	0	0	0	0	0	0	0	7.99297e-05	0	0.000159859	7.99297e-05
OTU_1625	1625	Armatimonadetes	Armatimonadia	Armatimonadales				0	0	0	0	0	0	0	0	0	0	0	0	0	0	0	0	0	0	0	0	0	0	0	0	0	0	0	0	0	0	0	0	0	0	0	0	0	0	0	7.99297e-05	0	7.99297e-05
OTU_2484	2484	Armatimonadetes						0	0	0	0	0	0	0	0	0	0	0	0	0	0	0	0	0	0	0	0	0	0	0	0	0	0	0	0	0	0	0	0	0	0	0	0	0	0	7.99297e-05	0	0	0
OTU_1634	1634	Proteobacteria	Alphaproteobacteria					0	0	0	0	0	0	0	0	0	0	0	0	0	0	0	0	0	0	0	0	0.000239789	0	0	0	7.99297e-05	7.99297e-05	0	0	0	0	0	7.99297e-05	0	0.000159859	0	0	0	0	0	0	0	0
OTU_1707	1707	Firmicutes	Clostridia	Clostridiales	Peptostreptococcaceae	Sporacetigenium		0	0	0	0	0	0	0	0	0	0	0	0	0	0	0	0	0	0	0	0	0	0	0	0	7.99297e-05	0	0	0	0	0	0	0	0	0	0	0	0	0	0	0	7.99297e-05	7.99297e-05
OTU_4135	4135	Proteobacteria	Alphaproteobacteria	Rhodospirillales	Acetobacteraceae			0	0	0	0	0	0	0	0	0	0	0	0	0	0	0	0	0	0	0	0	0	0	0	0	0	0	0	0	0	0	0	0	0	0	0	0	0	0	7.99297e-05	0.000239789	0	0
OTU_1952	1952	Acidobacteria	unidentified_Acidobacteria	Subgroup_4	unidentified_Acidobacteria	Blastocatella		0	0	0	0	0	0	0	0	0	0	0	0	0	0	0	0	0	0	0	0	0	0	0	0	0	0	0.000159859	0	0	0	0	0	0	0	0	0	0	0	0	7.99297e-05	0	0
OTU_2095	2095	Proteobacteria	Deltaproteobacteria	Myxococcales				0	0	0	0	0	0	0	0	0	0	0	0	0	0	0	0	0	0	0	0	0	0	0	0	0	0	0	0	0	0	0	0	0	0	0	0	0	0	0.000159859	0	0.000159859	0
OTU_1439	1439	Proteobacteria	Deltaproteobacteria	Oligoflexales				0	0	0	0	0	0	0	0	0	0	0	0	0	0	0	0	0	0	0	0	0	0	0	0	0	0	0	0	0	0	0	0	0	0	0	0	0	0	0.000159859	7.99297e-05	0	0
OTU_1141	1141	Armatimonadetes						0	0	0	0	0	0	0	0	0	0	0	0	0	0	0	0	0	0	0	0	0	0	0	0	0	0	0	0	0	0	0	0	0	0	0	0	0	0	7.99297e-05	0	7.99297e-05	7.99297e-05
OTU_1241	1241	Planctomycetes	vadinHA49					0	0	0	0	0	0	0	0	0	0	0	7.99297e-05	0	0	0	0	0	0	0	0	0	0	0	0	0	7.99297e-05	0	0	0	0	0	0	0	0	0	0	7.99297e-05	0	7.99297e-05	0	0	0
OTU_2336	2336	Proteobacteria						0	0	0	0	0	0	0	0	0	0	0	0	0	0	0	0	0	0	0	0	0	0	0	0	0	0	0	0	0	0	0	0	0	0	0	0	0	0	0	0	0	0
OTU_1729	1729	Proteobacteria	Deltaproteobacteria	Bdellovibrionales	Bdellovibrionaceae	Bdellovibrio		0	0	0	0	0	0	0	0	0	0	0	0	0	0	0	0	0	0	0	0	0	0	0	0	0	0	0	0	0	0	0	0.000319719	0	0	0	0	0	0	7.99297e-05	0	0	0
OTU_3498	3498	Chloroflexi	KD4-96					0	0	0	0	0	0	0	0	0	0	0	0	0	0	0	7.99297e-05	0	0	0	0	0	0	0	0	0	0	0	0	0	0	0	0	0	0	0	0	0	0	0	0	0	0
OTU_1042	1042	Proteobacteria	Deltaproteobacteria	Myxococcales	Haliangiaceae	Haliangium		0	0	0	0	0	0	0	0	0	0	0	0	0	7.99297e-05	0	0	0	0	0	0	0	0	0	0	0	0	0	7.99297e-05	0	0	0	0	0	0	0	0	0	0	0	0	7.99297e-05	0
OTU_3755	3755	Bacteroidetes	Flavobacteriia	Flavobacteriales	Flavobacteriaceae	Flavobacterium		0	0	0	0	0	0	0	0	0	0	0	0	0	0	0	0	0	0	0	0	0	0	0	0.000159859	0	0	0	7.99297e-05	0	0	0	0	0	0	0	0	7.99297e-05	0	0.000319719	0	0	0
OTU_1546	1546	Acidobacteria	unidentified_Acidobacteria	Subgroup_3				0	0	0	0	0	0	0	0	0	0	0	0	0	0	0	0	0	0	0	0	0	0	0	0	0	0	0	0	0	0	0	0	0	0	0	0	0	0	0	0	7.99297e-05	7.99297e-05
OTU_1943	1943	Proteobacteria	Deltaproteobacteria	Oligoflexales				0	0	0	0	0	0	0	0	0	0	0	0	0	0	0	0	0	0	0	0	0	0	0	0	0	0	0	0	0	7.99297e-05	0	0	0	0	0	0	0	0	7.99297e-05	0	0	0
OTU_1553	1553	Gemmatimonadetes	unidentified_Gemmatimonadetes	AT425-EubC11_terrestrial_group				0	0	0	0	0	0	0	0	0	0	0	0	0	0	0	0	0	0	0	0	0	0	0	0	0	0	0	0	0	0	0	0	0	0	0	0	0	0	7.99297e-05	0	0.000159859	0
OTU_2084	2084	Actinobacteria	Acidimicrobiia	Acidimicrobiales				0	0	0	0	0	0	0	0	0	0	0.000159859	0	0	0	0	0	0	0	0	0	0	0	0	0	0	0	0	0	0	0	0	0	0	0	0	0	0	0	0	0	0	7.99297e-05
OTU_3768	3768	Elusimicrobia	unidentified_Elusimicrobia	Lineage_IIb				0	0	0	0	0	0	0	0	0	0	0	0	0	0	0	0	0	0	0	0	0	0	0	0	0	0	0	0	0	0	0	0	0	0	0	0	0	0	7.99297e-05	7.99297e-05	0	7.99297e-05
OTU_882	882	Proteobacteria	Alphaproteobacteria	Rhodospirillales				0	0	0	0	0	0	0	0	0	0	0	0	0	0	0	0	0	0	0	0	0	0	0	0	0	0	0	0	0	0	0	0	0	0	0	0	0	0	0	0	0	0
OTU_2853	2853	Elusimicrobia	unidentified_Elusimicrobia	Lineage_IV				0	0	0	0	0	0	0	0	0	0	0	0	0	0	0	0	0	0	0	0	0	0	0	0	0	0	0	0	0	0	0	0	0	0	0	0	0	0	0.000239789	0.000239789	7.99297e-05	0
OTU_2269	2269	Proteobacteria	Deltaproteobacteria	Bdellovibrionales	Bdellovibrionaceae	Bdellovibrio		0	0	0	0	0	0	0	0	0	0	0	0	0	0	0	0	0	0	0	0	0	0	0	0	0	0	0	0	0	0	0	0.000239789	0	0	0	0	0	0	0	0	0	0
OTU_2820	2820	Actinobacteria	unidentified_Actinobacteria	Propionibacteriales	Nocardioidaceae	Nocardioides		0	0	0	0	0	0	0	0	0	0	0	0	0	0	0	0	0	0	0	0	0	0	0	0	0	0	0	0	0	0	0	0	0	0	0	0	0	0	7.99297e-05	0	0	0
OTU_1918	1918	Proteobacteria	Alphaproteobacteria	Rhodospirillales	Rhodospirillaceae			0	0	0	0	0	0	0	0	0	0	0	0	0	0	0	0	0	0	0	0	0	0	0	0	0	0	0	0	0	0	0	0	0	0	0	0	0	0	0	0	0	0
OTU_960	960	Proteobacteria	Deltaproteobacteria	Myxococcales	Sandaracinaceae	Sandaracinus		0	0	0	0	0	0	0	0	0	0	0	0	0	0	0	0	0	0	0	0	0	0	0	0	0	0	0	0	0	0	0	0	0	0	0	0	0	0	0	0	0	0
OTU_1833	1833	Proteobacteria	Deltaproteobacteria	Oligoflexales	Oligoflexaceae	unidentified_Oligoflexaceae		0	0	0	0	0	0	0	0	0	0	0	0	0	0	0	0	0	0	0	0	0	0	0	0	0	0	0	0	0	0	0	0.000239789	0	0	0	0	0	0	0	0	0	0
OTU_2964	2964	Chloroflexi	Caldilineae	Caldilineales	Caldilineaceae			0	0	0	0	0	0	0	0	0	0	0	0	0	0	0	0	0	0	0	0	0	0	0	0	0	0	0	0	0	0	0	0	0	0	0	0	0	0	0	0	0	0
OTU_2319	2319	Proteobacteria	Deltaproteobacteria	Oligoflexales	unidentified_Oligoflexales	unidentified_Oligoflexales	Geobacter_sp._enrichment_culture_clone_VanCtr1	0	0	0	0	0	0	0	0	0	0	0	0	0	0	0	0	0	0	0	0	0	0	0	0	0	0	7.99297e-05	0	0	0	0	0	0	0	0	0	0	0	0	0	0	7.99297e-05
OTU_2502	2502	Proteobacteria	Alphaproteobacteria	Rhodospirillales	unidentified_Rhodospirillales	Candidatus_Alysiosphaera		0	0	0	0	0	0	0	0	0	0	0	0	0	0	0	0	0	0	0	0	0	0	0	0	0	0	0	0	0	0	0	0	0	0	0	0	0	0	0.000159859	7.99297e-05	0	0
OTU_1321	1321	Proteobacteria	Gammaproteobacteria	unidentified_Gammaproteobacteria	unidentified_Gammaproteobacteria	Marinicella		0	0	0	0	0	0	0	0	0	0	0	0	0	0	0	0	0	0	7.99297e-05	0	0	0	0	0	0	0	0	0	0	0	0	0	0	0	0	0	0	0	0	7.99297e-05	7.99297e-05	7.99297e-05
OTU_1882	1882	Acidobacteria	unidentified_Acidobacteria	Subgroup_3				0	0	0	0	0	0	0	0	0	0	0	0	0	0	0	0	0	0	0	0	0	0	0	0	0	0	0	0	0	0	0	0	0	0	0	0	0	0	0	0	0	0
OTU_4066	4066	Proteobacteria	Deltaproteobacteria					0	0	0	0	0	0	0	0	0	0	0	0	0	0	0	0	0	0	0	0	0	0	0	0	0	0	0	0	0	0	0	0	0	0	0	0	0	0	0	7.99297e-05	0	0
OTU_2327	2327	Proteobacteria	Deltaproteobacteria	Myxococcales	Cystobacteraceae	Anaeromyxobacter		0	0	0	0	0	0	0	0	0	0	0	0	0	0	0	0	0	0	0	0	0	0	0	0	0	0	0	0	0	0	0	0	0	0	7.99297e-05	0	0	0	0	0	0	0
OTU_2543	2543	Proteobacteria	Gammaproteobacteria	Pseudomonadales	Pseudomonadaceae	Pseudomonas	Pseudomonas_caeni	7.99297e-05	0	0	0	0	0	0	0	0	0	0	0	0	0	0	0	0	0	0	0	0	0	0	0	0	0	0	0	7.99297e-05	0	0	0	0	0	0	0	0	0	7.99297e-05	0	0	0
OTU_3679	3679	Proteobacteria	Alphaproteobacteria	Rickettsiales	SM2D12			0	0	0	0	0	0	0	0	0	0	0	0	0	0	0	0	0	0	0	0	0	0	0	0	0.000239789	0	0	7.99297e-05	0	0	0	0	0	0	0	0	0	7.99297e-05	0	0	0	0
OTU_3164	3164	Gemmatimonadetes	unidentified_Gemmatimonadetes	AT425-EubC11_terrestrial_group				0	0	0	0	0	0	0	0	0	0	0	0	0	0	0	0	0	0	0	0	0	0	0	0	0	0	0	7.99297e-05	0	0	0	0	0	0	0	0	0	0	0	0	7.99297e-05	0
OTU_1667	1667	WCHB1-60						0	0	0	0	0	0	0	0	0	0	0	0	0	0	0	0	0	0	0	0	0	0	0	0	0	0	0	0	0	0	0	0	0	0	0	0	0	0	0	0.000239789	0	0.000159859
OTU_2030	2030							0	0	0	0	0	0	0	0	0	0	0	0	0	0	0	0	0	0	0	0	0	0	0	0	0	0	0	0	0	0	0	0	0	0	0	0	0	0	7.99297e-05	0.000159859	0	0
OTU_4572	4572	Proteobacteria	Alphaproteobacteria	Rhizobiales				0	0	0	0	0	0	0	0	0	0	0	0	0	0	0	0	0	0	0	0	0	0	0	0	0	0	0	0	0	0	7.99297e-05	0	0	0	0	0	0	0	0	0	0	0
OTU_1019	1019	Proteobacteria	Deltaproteobacteria	Bdellovibrionales	Bdellovibrionaceae			0	0	0	0	0	0	0	0	0	0	0	0	0	0	0	0	0	0	0	0	0	0	0	7.99297e-05	0	0	0	0	0	0	0	0	0	0	0	0	0	0	0	0	0	7.99297e-05
OTU_2435	2435	Elusimicrobia	unidentified_Elusimicrobia	Lineage_IIb				0	0	0	0	0	0	0	0	0	0	0	0	0	0	0	0	0	0	0	0	0	0	0	0	0	0	0	0	0	0	0	0	0	0	0	0	0	0	0	0	7.99297e-05	0
OTU_2038	2038	Acidobacteria	unidentified_Acidobacteria	Subgroup_4	unidentified_Acidobacteria	Blastocatella		0	0	0	0	0	0	0	0	0	0	0	0	0	0	0	0	0	0	0	0	0	0	0	0	0	0	0	0	0	0	0	0	0	0	0	0	0	0	0	0	0	0
OTU_1195	1195	Proteobacteria	Alphaproteobacteria	DB1-14				0	0	0	0	0	0	0	0	0	0	0	0	0	0	0	0	0	0	0	0	0	0	0	0	0	0	0	0	0	0	0	0	0	0	0	0	0	0	0	0	0	0
OTU_1641	1641	Proteobacteria						0	0	0	0	0	0	0	0	0	0	0	0	0	0	0	0	0	0	0	0	0	0	0	0	0	0	0	0	0	0	0	0	0	0	0	0	0	0	0	0	0	0
OTU_1907	1907	Chlorobi	Chlorobia	Chlorobiales				0	0	0	0	0	0	0	0	0	0	0	0	0	0	0	0	0	0	0	0	0	0	0	0	0	0	0	0	0	0	0	0	0	0	0	0	7.99297e-05	0	0	0	7.99297e-05	0
OTU_2897	2897	Planctomycetes						0	0	0	0	0	0	0	0	0	0	0	0	0	0	0	0	0	0	0	0	0	0	0	0	0	0	0	0	0	0	0	0	0	0	0	0	0	0	0	0	7.99297e-05	0
OTU_4638	4638	Proteobacteria	Alphaproteobacteria	Rhodospirillales	Acetobacteraceae	Roseomonas		0	0	0	0	0	0	0	0	0	0	0	0	0	0	0	0	0	0	0	0	0	0	0	0	0	0	0	0	0	0	0	0	0	0	0	0	0	0	0	0	0	0
OTU_2192	2192	Proteobacteria	Deltaproteobacteria	Bdellovibrionales	Bdellovibrionaceae			0	0	0	0	0	0	0	0	0	0	0	0	0	0	0	0	0	0	0	0	0	0	0	0	0	0	0	0	7.99297e-05	0	0	0	0	7.99297e-05	0	0	0	0	0	0	7.99297e-05	7.99297e-05
OTU_1731	1731	Proteobacteria	Deltaproteobacteria	Oligoflexales				0	0	0	0	0	0	0	0	0	0	0	0	0	0	0	0	0	0	0	0	0	0	0	0	0	0	0	0	0	0	0	0	0	0	0	0	0	0	0	0	0	0
OTU_3159	3159	Chloroflexi	KD4-96					0	0	0	0	0	0	0	0	0	0	0	0	0	0	0	0	0	0	0	0	0	0	0	0	0	0	0	0	0	0	0	0	0	0	0	0	0	0	0	0	0	0
OTU_3340	3340	Proteobacteria	Alphaproteobacteria	Rhodobacterales	Rhodobacteraceae	Rubellimicrobium		0	0	0	0	0	0	0	0	0	0	0	0	0	0	0	0	0	0	0	0	0	0	0	0	0	0	0	0	0	0	0	0	0	0	0	0	0	0	0	0	0	0
OTU_1706	1706	Proteobacteria	Deltaproteobacteria	Myxococcales	Nannocystaceae			0	0	0	0	0	0	0	0	0	0	0	0	0	0	0	0	0	0	0	0	0	0	0	0	0	0	0	0	0	0	0	0	0	0	0	0	0	0	0	0	0	0
OTU_2270	2270	Proteobacteria	Deltaproteobacteria	Oligoflexales				0	0	0	0	0	0	0	0	0	0	0	0	0	0	0	0	0	0	0	0	0	0	0	0	0	0	0	0	0	0	0	0	0	0	0	0	0	0	0	7.99297e-05	0	0
OTU_2463	2463	Proteobacteria	Deltaproteobacteria	Myxococcales	BIrii41			0	0	0	0	0	0	0	0	0	0	0	0	0	0	0	0	0	0	0	0	0	0	0	0	0	0	0	0	0	0	0	0	0	0	0	0	0	0	0	7.99297e-05	0	0
OTU_1453	1453	Proteobacteria	Gammaproteobacteria	Oceanospirillales	Halomonadaceae	Halomonas	Candidatus_Halomonas_phosphatis	0	0	0	0	0	0	0	0	0	0	0	0	0	0	0	0	0	0	0	0	0	0	0	0	0	0	0	0	0	0	0	0	0	0	0	0	0	0	0	0	0.000239789	0
OTU_2195	2195	Proteobacteria	Alphaproteobacteria	Rhodobacterales	Rhodobacteraceae	Rubellimicrobium		0	0	0	0	0	0	0	0	0	0	0	0	0	0	0	0	0	0	0	0	0	0	0	0	0	0	0	0	0	0	0	0	0	0	0	0	0	0	0	0	0	7.99297e-05
OTU_2206	2206	SHA-109						0	0	0	0	0	0	0	0	0	0	0	0	0	0	0	0	0	0	0	0	0	0	0	0	0	0	0	0	0	0	0	0	0	0	0	0	0	0	0	0	0	0
OTU_1362	1362	Bacteroidetes	Sphingobacteriia	Sphingobacteriales	NS11-12_marine_group			0	0	0	0	0	0	0	0	0	0	0	0	0	0	0	0	0	0	0	0	0	0	0	0	7.99297e-05	0	0	0	0	0	0	0	0	0	0	0	0	0	0	0	0	0
OTU_1438	1438	Bacteroidetes	Sphingobacteriia	Sphingobacteriales	NS11-12_marine_group			0	0	0	0	0	0	0	0	0	0	0	0	0	0	0	0	0	0	0	0	0	0	0	0	0	0	0	0	0	0	0	0	0	0	0	0	0	0	0	0	0	0
OTU_1484	1484	Proteobacteria	Deltaproteobacteria	Bdellovibrionales	Bacteriovoracaceae	Peredibacter		0	0	0	0	0	0	0	0	0	0	0	0	0	0	0	0	0	0	0	0.000159859	0	0	0	0	0	0	0	0	0	0	0	0	0	0.000239789	0	0	0	0	0	0	0	0
OTU_1719	1719	Proteobacteria	Alphaproteobacteria	Rhizobiales	A0839			0	0	0	0	0	0	0	0	0	0	0	0	0	0	0	0	0	0	0	0	0	0	0	0	0	0	0	0	0	0	0	0	0	0	0	0	0	0	0	0	0	0
OTU_2145	2145	Bacteroidetes	Cytophagia	Cytophagales	Cytophagaceae			0	0	0	0	0	0	0	0	0	0	0	0	0	0	0	0	0	0	0	0	0	0	0	0	0	0	0	0	0	0	0	0	0	0	0	0	0	0	0	0	0	0
OTU_2832	2832	Acidobacteria	unidentified_Acidobacteria	Subgroup_4	unidentified_Acidobacteria	Blastocatella		0	0	0	0	0	0	0	0	0	0	0	0	0	0	0	0	0	0	0	0	0	0	0	0	0	0	0	0	0	0	0	0	0	0	0	0	0	0	0	0	0	0
OTU_1358	1358	Planctomycetes	Phycisphaerae	WD2101_soil_group				0	0	0	0	0	0	0	0	0	0	0	0	0	0	0	0	0	0	0	0	0	0	0	0	0	0	0	0	0	0	0	0	0	0	0	0	0	0	0	0	0	0
OTU_1866	1866	Gemmatimonadetes	unidentified_Gemmatimonadetes	AT425-EubC11_terrestrial_group				0	0	0	0	0	0	0	0	0	0	0	0	0	0	0	0	0	0	0	0	0	0	0	0	0	0	0	0	0	0	0	0	0	0	0	0	0	0	0	0	0	0
OTU_2185	2185	Verrucomicrobia	Spartobacteria	Chthoniobacterales	Chthoniobacteraceae	Chthoniobacter		0	0	0	0	0	0	0	0	0	0	0	0	0	0	0	0	0	0	0	0	0	0	0	0	0	0	0	0	0	0	0	0	0	0	0	0	0	0	0	7.99297e-05	7.99297e-05	7.99297e-05
OTU_2339	2339	Bacteroidetes	Sphingobacteriia	Sphingobacteriales	Chitinophagaceae	Ferruginibacter		0	0	0	0	0	0	0	0	0	0	0	0	0	0	0	0	0	0	0	0	0	0	0	0	0	0	0	0	0	0	0	0	0	0	0	0	0	0	7.99297e-05	0	0	0
OTU_2952	2952	Proteobacteria	Deltaproteobacteria	Myxococcales	BIrii41			0	0	0	0	0	0	0	0	0	0	0	0	0	0	0	0	0	0	0	0	0	0	0	0	0	0	0	7.99297e-05	0	0	0	0	0	0	0	0	0	0	0.000159859	0	0	0
OTU_1558	1558	Proteobacteria	Alphaproteobacteria	Rhizobiales				0	0	0	0	0	0	0	0	0	0	0	0	0	0	0	0	0	0	0	0	0	0	0	0	0	0	0	0	0	0	0	0	0	0	0	0	0	0	0	0	0	0
OTU_4531	4531	Proteobacteria	Deltaproteobacteria	Oligoflexales				0	0	0	0	0	0	0	0	0	0	0	0	0	0	0	0	0	0	0	0	0	0	0	0	0	0	0	0	0	0	0	0	0	0	0	0	0	0	7.99297e-05	0	0	0
OTU_1535	1535	Proteobacteria	Alphaproteobacteria	Rickettsiales	unidentified_Rickettsiales	Candidatus_Odyssella		0	0	0	0	0	0	0	0	0	0	0	0	0	0	0	0	0	0	0	0	0.000319719	0	0	0	0	0	0	0	0	0	0	0	0	0	0	0	0	0	0	0	0	0
OTU_4856	4856	Verrucomicrobia	OPB35_soil_group					0	0	0	0	0	0	0	0	0	0	0	0	0	0	0	0	0	0	0	0	0	0	0	0	0	0	0	0	0	0	0	0	0	0	0	0	0	0	0	0	0.000319719	0
OTU_1500	1500	Armatimonadetes						0	0	0	0	0	0	0	0	0	0	0	0	0	0	0	0	0	0	0	0	0	0	0	0	0	0	0	0	0	0	0	0	0	0	0	0	0	0	0	0	0	0
OTU_2501	2501	Gemmatimonadetes	unidentified_Gemmatimonadetes	BD2-11_terrestrial_group				0	0	0	0	0	0	0	0	0	0	0	0	0	0	0	0	0	0	0	0	0	0	0	0	0	0	0	0	0	0	0	0	0	0	0	0	0	0	0	7.99297e-05	7.99297e-05	0
OTU_1267	1267	Proteobacteria	Deltaproteobacteria	Myxococcales	Sandaracinaceae			0	0	0	0	0	0	0	0	0	0	0	0	0	0	0	0	0	0	0	0	0	0	0	0	0	0	0	0	0	0	0	0	0	0	0	0	0	0	0	0	0	0
OTU_1565	1565	Acidobacteria	unidentified_Acidobacteria	Subgroup_3				0	0	0	0	0	0	0	0	0	0	0	0	0	0	0	0	0	0	0	0	0	0	0	0	0	0	7.99297e-05	0	0	0	7.99297e-05	0	0	0	0	0	0	0	0	0	0	0
OTU_1875	1875	Proteobacteria	Deltaproteobacteria	Myxococcales	Haliangiaceae	Haliangium		0	0	0	0	0	0	0	0	0	0	0	0	0	0	0	0	0	0	0	0	0	0	0	0	0	0	0	0	0	0	0	0	0	0	0	0	0	0	0	0	0	7.99297e-05
OTU_2205	2205	Proteobacteria	Deltaproteobacteria	Bdellovibrionales	Bdellovibrionaceae			0	0	0	0	0	0	0	0	0	0	0	0	0	0	0	0	0	0	0	0	0	0	0	0	0	0	0	0	0	0	0	0	0	0	0	0	0	0	7.99297e-05	0	0	7.99297e-05
OTU_2383	2383	Proteobacteria	Alphaproteobacteria	Sphingomonadales	7B-8			0	0	0	0	0	0	0	0	0	0	0	0	0	0	0	0	0	0	0	0	0	0	0	0	0	0	0	0	0	0	0	0	0	0	0	0	0	0	7.99297e-05	0	0	0
OTU_2873	2873	Proteobacteria	Deltaproteobacteria	Bdellovibrionales	Bdellovibrionaceae	Bdellovibrio		0	0	0	0	0	0	0	0	0	0	0	0	0	0	0	0	0	0	0	0	0	0	0	0	7.99297e-05	0	0	0	0	0	0	0	0	0	0.000159859	0	0	0	0	0	0	0
OTU_1295	1295	Acidobacteria	unidentified_Acidobacteria	Subgroup_4	DS-100			0	0	0	0	0	0	0	0	0	0	0	0	0	0	0	0	0	0	0	0	0	0	0	0	0	0	0	0	0	0	0	0	0	0	0	0	0	0	0	0	0	0
OTU_4576	4576	Proteobacteria	Alphaproteobacteria	Rickettsiales	SM2D12			0	0	0	0	0	0	0	0	0	0	0	0	0	0	0	0	0	0	0	0	0	0	0	0	0	0	0	0	0	0	0	0	0	0	0	0	0	0	0	0	0	0
OTU_2309	2309	Acidobacteria	unidentified_Acidobacteria	Subgroup_4	unidentified_Acidobacteria	Blastocatella		0	0	0	0	0	0	0	0	0	0	0	0	0	0	0	0	0	0	0	0	0	0	0	0	0	0	0	0	0	0	0	0	0	0	0	0	0	0	0	0	0	0
OTU_1356	1356	Chlorobi	Chlorobia	Chlorobiales	OPB56			0	0	0	0	0	0	0	0	0	0	0	0	0	0	0	0	0	0	0	0	0	0	0	0	0	0	0	7.99297e-05	0	0	0	0	0	0	0	0	0	0	0	0	0	0
OTU_1446	1446	Proteobacteria	Deltaproteobacteria	Bdellovibrionales	Bdellovibrionaceae	Bdellovibrio		0	0	0	0	0	0	0	0	0	0	0	0	0	0	0	0	0	0	0	0	0	0	0	0	0	0	0	0	0	0	0	0	0	0	0	0	0	0	0	0	0	0
OTU_1556	1556	Proteobacteria	Deltaproteobacteria	Myxococcales	Polyangiaceae	Sorangium		0	0	0	0	0	0	0	0	0	0	0	0	0	0	0	0	0	0	0	0	0	0	0	0	0	0	0	0	0	0	0	0	0	0	0	0	0	0	0	0	0	7.99297e-05
OTU_1597	1597	Proteobacteria	TA18					0	0	0	0	0	0	0	0	0	0	0	0	0	0	0	0	0	0	0	0	0	0	0	0	0	0	0	0	0	0	0	0	0	0	0	0	0	0	7.99297e-05	7.99297e-05	0	0
OTU_2233	2233	Planctomycetes	OM190					0	0	0	0	0	0	0	0	0	0	0	0	0	0	0	0	0	0	0	0	0	0	0	0	0	0	0	0	0	0	0	0	0	0	0	0	0	0	0	0	0	0
OTU_2511	2511	Verrucomicrobia	Verrucomicrobiae	Verrucomicrobiales	Verrucomicrobiaceae	Prosthecobacter		0	0	0	0	0	0	0	0	0	0	0	0	0	0	0	0	0	0	0	0	0	0	0	0	0	0	0	0	0	0	0	0	0	0	0	0	0	0	0	0	0	0
OTU_3107	3107	Armatimonadetes						0	0	0	0	0	0	0	0	0	0	0	0	0	0	0	0	0	0	0	0	0	0	0	0	0	7.99297e-05	0	0	0	0	0	0	0	0	0	0	0	0	0	0	0	0
OTU_2828	2828	Proteobacteria	Alphaproteobacteria	DB1-14				0	0	0	0	0	0	0	0	0	0	0	0	0	0	0	0	0	0	0	0	0	0	0	0	0	0	0	0	0	0	0	0	0	0	0	0	7.99297e-05	0	0	0	0	0
OTU_3071	3071	Proteobacteria	Deltaproteobacteria	Oligoflexales				0	0	0	0	0	0	0	0	0	0	0	0	0	0	0	0	0	0	0	0	0	0	0	0	0	0	0	0	0	0	0	0	0	0	0	0	0	0	7.99297e-05	0	7.99297e-05	0
OTU_2328	2328	Proteobacteria	TA18					0	0	0	0	0	0	0	0	0	0	0	0	0	0	0	0	0	0	0	0	0	0	0	0	0	0	0	0	0	0	0	0	0	0	0	0	0	0	0	0	0	7.99297e-05
OTU_1573	1573	Gemmatimonadetes	unidentified_Gemmatimonadetes	Gemmatimonadales	Gemmatimonadaceae			0	0	0	0	0	0	0	0	0	0	0	0	0	0	0	0	0	0	0	0	0	0	0	0	0	0	0	0	0	0	0	0	0	0	0	0	0	0	0	7.99297e-05	0	0
OTU_1664	1664	WCHB1-60						0	0	0	0	0	0	0	0	0	0	0	0	0	0	0	0	0	0	0	0	0	0	0	0	0	0	0	0	0	0	0	0	0	0.000159859	0	0	0	0	0	0	7.99297e-05	0
OTU_1712	1712	Proteobacteria	Alphaproteobacteria	DB1-14				0	0	0	0	0	0	0	0	0	0	0	0	0	0	7.99297e-05	0	0	0	0	0	0	0	0	0	0	0	0	0	0	0	0	0	0	0	0	0	0	0	0	0	0	0
OTU_1717	1717	Chlamydiae	unidentified_Chlamydiae	Chlamydiales	Simkaniaceae	Candidatus_Rhabdochlamydia		0	0	0	0	0	0	0	0	0	0	0	0	0	0	0	0	0	0	0	0	0	0	0	0	0	0	0	0	0	0	0	0	0	0	0	0	0	0	0	0	0	0
OTU_1780	1780	Proteobacteria	Betaproteobacteria					0	0	0	0	0	0	0	0	0	0	0	0	0	0	0	0	0	0	0	0	0	0	0	0	0	0	0	0	0	0	0	0	0	0	0	0	0	0	0	0	7.99297e-05	0
OTU_2003	2003							0	0	0	0	0	0	0	0	0	0	0	0	0	0	0	0	0	0	0	0	0	0	0	0	0	0	0	0	0	0	0	0	0	0	0	0	0	0	0	0	0	0
OTU_2085	2085	Acidobacteria	unidentified_Acidobacteria	Subgroup_4	43063			0	0	0	0	0	0	0	0	0	0	0	0	0	0	0	0	0	0	0	0	0	0	0	0	0	0	0	0	0	0	0	0	0	0	0	0	0	0	0	0	0	0
OTU_2488	2488	Proteobacteria						0	0	0	0	0	0	0	0	0	0	0	0	0	0	0	0	0	0	0	0	0	0	0	0	0	0	0	0	0	0	0	7.99297e-05	0	0	0	0	0	0	0	0	0	0
OTU_2672	2672	Actinobacteria	Acidimicrobiia	Acidimicrobiales	Acidimicrobiaceae			0	0	0	0	0	0	0	0	0	0	0	0	0	0	0	0	0	0	0	0	0	0	0	0	0	0	0	0	0	0	0	0	0	0	0	0	0	0	0	0	0	0
OTU_3020	3020	Planctomycetes	Phycisphaerae	WD2101_soil_group				0	0	0	0	0	0	0	0	0	0	0	0	0	0	0	0	0	7.99297e-05	0	0	0	0	0	0	0	0	0	0	0	0	0	0	0	0	0	0	0	0	0	0	0	0
OTU_1616	1616	Bacteroidetes	Sphingobacteriia	Sphingobacteriales	Saprospiraceae			0	0	0	0	0	0	0	0	0	0	0	0	0	0	0	0	0	0	0	0	0	0	0	0	0	0	0	0	0	0	0	0	0	0	0	0	0	0	0	0	0	0
OTU_1852	1852	Proteobacteria						0	0	0	0	0	0	0	0	0	0	0	0	0	0	0	0	0	0	0	0	0	0	0	0	0	0	0	0	0	0	0	0	0	0	0	0	0	0	0	0	0	0
OTU_2112	2112	Hydrogenedentes						0	0	0	0	0	0	0	0	0	0	0	0	0	0	0	0	0	0	0	0	0	0	0	0	0	0	0	0	0	0	0	0	0	0	0	0.000159859	0	0	0	0	0	0
OTU_2310	2310	Latescibacteria						0	0	0	0	0	0	0	0	0	0	0	0	0	0	0	0	0	0	0	0	0	0	0	0	0	0	0	0	0	0	0	0	0	0	0	0	0	0	7.99297e-05	0	0	0
OTU_2990	2990	Verrucomicrobia	Spartobacteria	Chthoniobacterales	Chthoniobacteraceae	Chthoniobacter		0	0	0	0	0	0	0	0	0	0	0	0	0	0	0	0	0	0	0	0	0	0	0	0	0	0	0	0	0	0	0	0	0	0	0	0	0	0	0	0	0	7.99297e-05
OTU_1589	1589	Acidobacteria	unidentified_Acidobacteria	Subgroup_3	unidentified_Acidobacteria	Bryobacter		0	0	0	0	0	0	0	0	0	0	0	0	0	0	0	0	0	0	0	0	0	0	0	0	0	0	0	0	0	0	0	0	0	0	0	0	0	0	0	0	0	0
OTU_1829	1829	Proteobacteria	Alphaproteobacteria	Rickettsiales				0	0	0	0	0	0	0	0	0	0	0	0.000239789	0	0	0	0	0	0	0	0	0	0	0	0	0	0	0	0	0	0	0	0	0	0	0	0	0	0	0	0	0	0
OTU_2018	2018	Proteobacteria	Alphaproteobacteria	Rhodospirillales	JG37-AG-20			0	0	0	0	0	0	0	0	0	0	0	0	0	0	0	0	0	0	0	0	0	0	0	0	0	0	0	0	0	0	0	0	0	0	0	0	0	0	0	0	0	0
OTU_2817	2817	Proteobacteria	Alphaproteobacteria	Rhizobiales	Bradyrhizobiaceae	unidentified_Bradyrhizobiaceae	Bradyrhizobium_sp._Shinshu-th2	0	0	0	0	0	0	0	0	0	0	0	0	0	0	0	0	0	0	0	0	0	0	0	0	0	0	0	0	0	0	0	0	0	0	0	0	0	0	0	0	0	0
OTU_4097	4097	Proteobacteria	Betaproteobacteria	SC-I-84				0	0	0	0	0	0	0	0	0	0	0	0	0	0	0	0	0	0	0	0	0	0	0	0	0	0	0	0	0	0	0	0	0	0	0	0	0	0	0	0	0	0
OTU_1393	1393	Proteobacteria	Betaproteobacteria					0	0	0	0	0	0	0	0	0	0	0	0	0	0	0	0	0	0	0	0	0	0	0	0	0	0	0	0	0	0	0	0	0	0	0	0	0	0	0	0	0	0
OTU_1720	1720	Firmicutes	Clostridia	Clostridiales	Clostridiaceae_1	Clostridium_sensu_stricto_13		0	0	0	0	0	0	0	0	0	0	0	0	0	0	0	0	0	0	0	0	0	0	0	0	0	0	0	0	0	0	0	0	0	0	0	0	0	0	0	0	0	0
OTU_1828	1828	Proteobacteria	Deltaproteobacteria	Oligoflexales				0	0	0	0	0	0	0	0	0	0	0	0	0	0	0	0	0	0	0	0	0	0	0	0	0	0	0	0	0	0	0	0	0	0	0	0	0	0	0	0	7.99297e-05	0
OTU_1849	1849	Planctomycetes	Phycisphaerae	WD2101_soil_group				0	0	0	0	0	0	0	0	0	0	0	0	0	0	0	0	0	0	0	0	0	0	0	0	0	0	0	0	0	0	0	0	0	0	0	0	0	0	0	0	0	0
OTU_1864	1864	Bacteroidetes						0	0	0	0	0	0	0	0	0	0	0	0	0	0	0	0	0	0	0	0	0	0	0	0	0	0	0	0	0	0	0	0	0	0	0	0	0	0	0	0	7.99297e-05	0
OTU_1939	1939	Proteobacteria	Alphaproteobacteria					0	0	0	0	0	0	0	0	0	0	0	0	0	0	0	0	0	0	0	0	0	0	0	0	0	0	0	0	0	0	0	0	0	0	0	0	0	0	0	0	0	0
OTU_2170	2170	Proteobacteria	Alphaproteobacteria	Rickettsiales	SM2D12			0	0	0	0	0	0	0	0	0	0	0	0	0	0	0	0	0	0	0	0	0	0	0	0	0	0	0	0	0	0	0	0	0	0	0	0	0	0	0	0	0	0
OTU_2201	2201	Verrucomicrobia	Verrucomicrobiae	Verrucomicrobiales	Verrucomicrobiaceae	Prosthecobacter		0	0	0	0	0	0	0	0	0	0	0	0	0	0	0	0	0	0	0	0	0	0	0	0	0	0	0	7.99297e-05	0	0	0	0	0	0	0	0	0	0	0	0	0	0
OTU_2719	2719	Actinobacteria	Acidimicrobiia	Acidimicrobiales				0	0	0	0	0	0	0	0	0	0	0	0	0	0	0	0	0	0	0	0	0	0	0	0	0	0	0	0	0	0	0	0	0	0	0	0	0	0	0	0	0	0
OTU_2797	2797	Planctomycetes	Planctomycetacia	Planctomycetales	Planctomycetaceae	Gemmata		0	0	0	0	0	0	0	0	0	0	0	0	0	0	0	0	0	0	0	0	0	0	0	0	0	0	0	0	0	0	0	0	0	0	0	0	7.99297e-05	0	0	0	0	0
OTU_3066	3066	Proteobacteria	Deltaproteobacteria	Myxococcales	Cystobacteraceae	Anaeromyxobacter		0	0	0	0	0	0	0	0	0	0	0	0	0	0	0	0	0	0	0	0	0	0	0	0	0	0	0	0	0	0	0	0	0	0	0	0	0	0	7.99297e-05	0	7.99297e-05	0
OTU_3635	3635	Proteobacteria	Deltaproteobacteria	Myxococcales	Polyangiaceae			0	0	0	0	0	0	0	0	0	0	0	0	0	0	0	0	0	0	0	0	0	0	0	0	0	0	0	0	0	0	0	0	0	0	0	0	0	0	7.99297e-05	7.99297e-05	0	0
OTU_3759	3759	Proteobacteria	Deltaproteobacteria	Oligoflexales	Oligoflexaceae			0	0	0	0	0	0	0	0	0	0	0	0	0	0	0	0	0	0	0	0	0	0	0	0	0	0	0	0	0	0	0	0	0	0	0	0	0	0	7.99297e-05	0	0	0
OTU_3809	3809	Planctomycetes	Phycisphaerae	WD2101_soil_group				0	0	0	0	0	0	0	0	0	0	0	0	0	7.99297e-05	0	0	0	0	0	0	0	0	0	0	0	0	0	0	0	0	0	0	0	0	0	0	0	0	0	0	0	0
OTU_4766	4766	Gemmatimonadetes	unidentified_Gemmatimonadetes	BD2-11_terrestrial_group				0	0	0	0	0	0	0	0	0	0	0	0	0	0	0	0	0	0	0	0	0	0	0	0	0	0	0	0	0	0	0	0	0	0	0	0	0	0	0	0	0	0
OTU_1416	1416	Proteobacteria	Alphaproteobacteria	Rhodospirillales				0	0	0	0	0	0	0	0	0	0	0	0	0	0	0	0	0	0	0	0	0	0	0	0	0	0	0	0	0	0	0	0	0	0	0	0	0	0	0	0	0	0
OTU_1651	1651	Acidobacteria	unidentified_Acidobacteria	Subgroup_4	unidentified_Acidobacteria	Blastocatella		0	0	0	0	0	0	0	0	0	0	0	0	0	0	0	0	0	0	0	0	0	0	0	0	0	0	0	0	0	0	0	0	0	0	0	0	0	0	0	0	0	0
OTU_2356	2356	Planctomycetes	vadinHA49					0	0	0	0	0	0	0	0	0	0	0	0	0	0	0	0	0	0	0	0	0	0	0	0	0	0	0	0	0	0	0	0	0	0	0	0	0	0	0	7.99297e-05	0	0
OTU_3121	3121	Proteobacteria	Deltaproteobacteria	Bdellovibrionales	Bdellovibrionaceae			0	0	0	0	0	0	0	0	0	0	0	0	0	0	0	0	0	0	0	0	0	0	0	0	0	0	0	0	0	0	0	0	0	0	0	0	0	0	0	0	0	0
OTU_3803	3803	Proteobacteria	Deltaproteobacteria	Myxococcales	Haliangiaceae	Haliangium		0	0	0	0	0	0	0	0	0	0	0	0	0	0	0	0	0	0	0	0	0	0	0	0	0	0	0	0	0	0	0	0	0	0	0	0	0	0	0	0.000159859	0	0
OTU_2362	2362	Proteobacteria	Gammaproteobacteria	Legionellales	Coxiellaceae	Aquicella		0	0	0	0	0	0	0	0	0	0	0	0	0	0	0	0	0	0	0	0	0	0	0	0	0	0	0	0	0	0	0	0	0	0	0	0	0	0	0	0	0	0
OTU_3408	3408	Proteobacteria	Deltaproteobacteria					0	0	0	0	0	0	0	0	0	0	0	0	0	0	0	0	0	0	0	0	0	0	0	0	0	0	0	0	0	0	0	0	0	0	0	0	0	0	0	0	0	0
OTU_1619	1619	Bacteroidetes	Cytophagia	Order_II	Rhodothermaceae			0	0	0	0	0	0	0	0	0	0	0	0	0	0	0	0	0	0	0	0	0	0	0	0	0	0	0	0	0	0	0	0	0	0	0	0	0	0	0	0	0	0
OTU_1809	1809	Actinobacteria	unidentified_Actinobacteria	Micrococcales	Demequinaceae	Demequina		0	0	0	0	0	0	0	0	0	0	0	0	0	0	0	0	0	0	0	0	0	0	0	0	0	0	0	0	0	0	0	0	0	0	0	0	0	0	0	0	7.99297e-05	0
OTU_2026	2026	Proteobacteria	Alphaproteobacteria					0	0	0	0	0	0	0	0	0	0	0	0	0	0	0	0	0	0	0	0	0	0	0	0	0	0	0	0	0	0	0	0	0	0	0	0	0	0	0	7.99297e-05	0	0
OTU_2537	2537	Elusimicrobia	unidentified_Elusimicrobia	MVP-88				0	0	0	0	0	0	0	0	0	0	0	0	0	0	0	0	0	0	0	0	0	0	0	0	0	0	0	0	0	0	0	0	0	0	0	0	0	0	0	0	0	0
OTU_2844	2844	Elusimicrobia	unidentified_Elusimicrobia	MVP-88				0	0	0	0	0	0	0	0	0	0	0	0	0	0	0	0	0	0	0	0	0	0	0	0	0	0	0	0	0	0	0	0	0	0	0	0	0	0	7.99297e-05	0	0	0
OTU_3104	3104	Firmicutes	Clostridia	Clostridiales	Clostridiaceae_1	Clostridium_sensu_stricto_12		0	0	0	0	0	0	0	0	0	0	0	0	7.99297e-05	0	0	0	0	0	0	0	0	0	0	0	0	0	0	0	0	0	0	0	0	0	0	0	0	0	0	7.99297e-05	0	0
OTU_3125	3125	Proteobacteria						0	0	0	0	0	0	0	0	0	0	0	0	0	0	0	0	0	0	0	0	0	0	0	0	0	0	0	0	0	0	0	0	0	0	0	0	0	0	0	0	0	0
OTU_3704	3704	Proteobacteria	Deltaproteobacteria	Bdellovibrionales	Bacteriovoracaceae	Peredibacter		0	0	0	0	0	0	0	0	0	0	0	0	0	0	0	0	0	0	0	0	0	0	0	0	0	0	0	0	0	0	0	0	0	0	0	0	0	0	0	0	0	0
OTU_3840	3840	Proteobacteria	Alphaproteobacteria					0	0	0	0	0	0	0	0	0	0	0	0	0	0	0	0	0	0	0	0	0	0	0	0	0	0	0	0	0	0	0	0	0	0	0	0	0	0	0	0	0	0
OTU_4057	4057	Saccharibacteria						0	0	0	0	0	0	0	0	0	0	0	7.99297e-05	0	0	0	0	0	0	0	0	0	0	0	0	0	0	0	0	7.99297e-05	0	0	0	0	0	0	0	0	0	0	0	0	0
OTU_4076	4076	Saccharibacteria						0	0	0	0	0	0	0	0	0	0	0	7.99297e-05	0	0	0	0	0	0	0	0	0	0	0	0	0	0	0	0	0	0	0	0	0	0	0	0	0	0	0	0	7.99297e-05	0
OTU_4416	4416	Proteobacteria	Deltaproteobacteria	Bdellovibrionales	Bacteriovoracaceae			0	0	0	0	0	0	0	0	0	0	0	0	0	0	0	0	0	0	0	0	0	0	0	0	0	0	0	0	0	0	0	0	0	0	0	0	7.99297e-05	0	0	0	0	0
OTU_4541	4541	Proteobacteria	Deltaproteobacteria	Myxococcales	Blfdi19			0	0	0	0	0	0	0	0	0	0	0	0	0	0	0	0	0	0	0	0	0	0	0	0	0	0	0	0	0	0	0	0	0	0	0	0	0	0	0	0	0	0
OTU_1759	1759	Bacteroidetes	Cytophagia	Cytophagales	Cytophagaceae	Ohtaekwangia		0	0	0	0	0	0	0	0	0	0	0	0	0	0	0	0	0	0	0	0	0	0	0	0	0	0	0	0	0	0	0	0	0	0	0	0	0	0	0	0	0	0
OTU_1906	1906	Proteobacteria	Betaproteobacteria	Burkholderiales				0	0	0	0	0	0	0	0	0	0	0	0	0	0	0	0	0	0	0	0	0	0	0	0	0	0	0	0	0	0	0	0	0	0	0	0	0	0	0	0	0	7.99297e-05
OTU_1949	1949	Proteobacteria	Alphaproteobacteria					0	0	0	0	0	0	0	0	0	0	0	0	0	0	0	0	0	0	0	0	0	0	0	0	0	0	0	0	0	0	0	0	0	0	0	0	0	0	0	0	0	0
OTU_1970	1970	Proteobacteria	Alphaproteobacteria	DB1-14				0	0	0	0	0	0	0	0	0	0	0	0	0	0	0	0	0	0	0	0	0	0	0	0	0	0	0	0.000159859	0	0	0	0	0	0	0	0	0	0	0	0	0	0
OTU_2035	2035	Proteobacteria						0	0	0	0	0	0	0	0	0	0	0	0	0	0	0	0	0	0	0	0	0	0	0	0	0	0	0	0	0	0	0	0	0	0	0	0	0	0	0	7.99297e-05	0.000159859	0
OTU_2237	2237	Proteobacteria	Deltaproteobacteria	Bdellovibrionales	Bacteriovoracaceae			0	0	0	0	0	0	0	0	0	0	0	0	0	0	0	0	0	0	0	0	0	0	0	0	0	0	0	0	0	0	0	0	0	0	0	0	0	0	0	0	0	0
OTU_2294	2294	Saccharibacteria						0	0	0	0	0	0	0	0	0	0	0	0	0	0	0	0	0	0	0	0	0	0	0	0	0	0	0	0	0	0	0	0	0	0	0	0	0	0	0	0	0	0
OTU_2363	2363	Verrucomicrobia	Verrucomicrobiae	Verrucomicrobiales	Verrucomicrobiaceae			0	0	0	0	0	0	0	0	0	0	0	0	0	0	0	0	0	0	0	0	0	0	0	0	0	0	0	0	0	0	0	0	0	0	0	0	0	0	0	0	0	0
OTU_2548	2548	Acidobacteria	unidentified_Acidobacteria	Subgroup_17				0	0	0	0	0	0	0	0	0	0	0	0	0	0	0	0	0	0	0	0	0	0	0	0	0	0	0	0	0	0	0	0	0	0	0	0	0	0	0	0	0	0
OTU_2679	2679	Proteobacteria	Alphaproteobacteria	DB1-14				0	0	0	0	0	0	0	0	0	0	0	0	0	0	0	0	0	0	0	0	0	0	0	0	0	0	0	0	0	0	0	0	0	0	0	0	0	0	0	0	0	0
OTU_3099	3099	Proteobacteria	Gammaproteobacteria					0	0	0	0	0	0	0	0	0	0	0	0	0	0	0	0	0	0	0	0	0	0	0	0	0	0	0	0	0	0	0	0	0	0	0	0	0	0	0	0	0	0
OTU_3336	3336	Proteobacteria	Alphaproteobacteria	Rhodospirillales	Rhodospirillaceae			0	0	0	0	0	0	0	0	0	0	0	0	0	0	0	0	0	0	0	0	0	0	0	0	0	0	0	0	0	0	0	0	0	0	0	0	0	0	0	0	0	0
OTU_4061	4061	Planctomycetes	OM190					0	0	0	0	0	0	0	0	0	0	0	0	0	0	0	0	0	0	0	0	0	0	0	0	0	0	0	0	0	0	0	0	0	0	0	0	0	0	0	7.99297e-05	0	0
OTU_1838	1838	Bacteroidetes	Sphingobacteriia	Sphingobacteriales	Sphingobacteriaceae	Solitalea		0	0	0	0	0	0	0	0	0	0	0	0	0	0	0	0	0	0	0	0	0	0	0	0	0	0	0	0	0	0	0	0	0	0	0	0	0	0	0	0	0	0
OTU_2178	2178	Elusimicrobia	unidentified_Elusimicrobia	Lineage_IIb				0	0	0	0	0	0	0	0	0	0	0	0	0	0	0	0	0	0	0	0	0	0	0	0	0	0	0	0	0	0	0	0	0	0	0	0	0	0	7.99297e-05	0	7.99297e-05	0
OTU_2337	2337	Proteobacteria	Deltaproteobacteria	Oligoflexales				0	0	0	0	0	0	0	0	0	0	0	0	0	7.99297e-05	0	0	0	0	0	0	0	0	0	0	0	0	0	0	0	0	0	0	0	0	0	0	0	0	0	0	0	0
OTU_2409	2409	Spirochaetes	unidentified_Spirochaetes	Spirochaetales	Spirochaetaceae	Spirochaeta_2	Spirochaeta_aurantia	0	0	0	0	0	0	0	0	0	0	0	0	0	0	0	0	0	0	0	0	0	7.99297e-05	0	0	0	0	0	0	0	0	0	0	0	0	0	0	7.99297e-05	0	0	0	0	0
OTU_2483	2483	Proteobacteria	Deltaproteobacteria	Myxococcales	Polyangiaceae	Sorangium		0	0	0	0	0	0	0	0	0	0	0	0	0	0	0	0	0	0	0	0	0	0	0	0	0	0	0	0	0	0	0	0	0	0	0	0	0	0	0	0	0	0
OTU_2560	2560	Proteobacteria	Alphaproteobacteria	Rickettsiales	SM2D12			0	0	0	0	0	0	0	0	0	0	0	0	0	0	0	0	0	0	0	0	0	0	0	0	0	0	0	0	0	0	0	0	0	0	0	0	0	0	0	0	0	7.99297e-05
OTU_2612	2612	Proteobacteria	Gammaproteobacteria	NKB5				0	0	0	0	0	0	0	0	0	0	0	0	0	0	0	0	0	0	0	0	0	0	0	0	0	0	0	0	0	0	0	0	0	0	0	0	0	0	0	0	0	7.99297e-05
OTU_2737	2737	Proteobacteria	Deltaproteobacteria	Oligoflexales				0	0	0	0	0	0	0	0	0	0	0	0	0	0	0	0	0	0	0	0	0	0	0	0	0	0	0	0	0	0	0	0	0	0	0	0	0	0	0	0	0	0
OTU_2786	2786	Proteobacteria	Alphaproteobacteria					0	0	0	0	0	0	0	0	0	0	0	0	0	0	0	0	0	0	0	0	0	0	0	0	0	0	0	0	0	0	0	0	0	0	0	0	0	0	0	0	0	0
OTU_2942	2942	Proteobacteria	Deltaproteobacteria	Oligoflexales				0	0	0	0	0	0	0	0	0	0	0	0	0	0	0	0	0	0	0	0	0	0	0	0	0	0	0	0	0	0	0	0	0	0	0	0	0	0	0	0	0	0
OTU_2951	2951	Gemmatimonadetes	unidentified_Gemmatimonadetes	Gemmatimonadales	Gemmatimonadaceae			0	0	0	0	0	0	0	0	0	0	0	0	0	0	0	0	0	0	0	0	0	0	0	0	0	0	0	0	0	0	7.99297e-05	0	0	0	0	0	0	0	7.99297e-05	0	0	0
OTU_3091	3091	Proteobacteria	Gammaproteobacteria	unidentified_Gammaproteobacteria	unidentified_Gammaproteobacteria	Marinicella		0	0	0	0	0	0	0	0	0	0	0	0	0	0	0	0	0	0	0	0	0	0	0	0	0	0	0	0	0	0	0	0	0	0	0	0	0	0	0	0	7.99297e-05	0
OTU_4004	4004	Proteobacteria	Deltaproteobacteria					0	0	0	0	0	0	0	0	0	0	0	0	0	0	0	0	0	7.99297e-05	0	0	0	0	0	0	0	0	0	0	0	0	0	0	0	0	0	0	0	0	0	0	0	0
OTU_4484	4484	Chlorobi	Chlorobia	Chlorobiales	OPB56			0	0	0	0	0	0	0	0	0	0	0	0	0	0	0	0	0	0	0	0	0	0	0	0	0	0	0	0	0	0	0	0	0	0	0	0	0	0	0	7.99297e-05	0	0
OTU_4512	4512							0	0	0	0	0	0	0	0	0	0	0	0	0	0	0	0	0	0	0	0	0	0	0	0	0	0	0	0	0	0	0	0	0	0	0	0	0	0	0	0	0	0
OTU_1977	1977	Bacteroidetes	Sphingobacteriia	Sphingobacteriales	AKYH767			0	0	0	0	0	0	0	0	0	0	0	0	0	0	0	0	0	0	0	0	0	0	0	0	0	0	0	0	0	0	0	0	0	0	0	0	0	0	0	0	0	0.000159859
OTU_2565	2565	Chlamydiae	unidentified_Chlamydiae	Chlamydiales	Parachlamydiaceae			0	0	0	0	0	0	0	0	0	0	0	0	0	0	0	0	0	0	0	0	0	0	0	0	0	0	0	0	0	0	0	0	0	0	0	0	0	0	0	0	0	0
OTU_4401	4401	Actinobacteria	unidentified_Actinobacteria	Frankiales	Acidothermaceae	Acidothermus		0	0	0	0	0	0	0	0	0	0	0	0	0	0	0	0	0	0	0	0	0	0	0	0	0	0	0	0	0	0	0	0	0	0	0	0	0	0	0	0	0	0
OTU_4677	4677	Chlamydiae	unidentified_Chlamydiae	Chlamydiales				0	0	0	0	0	0	0	0	0	0	0	0	0	0	0	0	0	0	0	0	0	0	0	0	0	0	0	0	0	0	0	0	0	0	0	0	0	0	0	0	0	0
OTU_2009	2009	Bacteroidetes	Sphingobacteriia	Sphingobacteriales	NS11-12_marine_group			0	0	0	0	0	0	0	0	0	0	0	0	0	0	0	0	0	0	0	0	0	0	0	0	0	0	0	0	0	0	0	0	0	0	0	0	0	0	0	0	0	7.99297e-05
OTU_2058	2058	Bacteroidetes						0	0	0	0	0	0	0	0	0	0	0	0	0	0	0	0	0	0	0	0	0	0	0	0	0	0	0	0	0	0	0	0	0	0	0	0	0	0	0	0	0	0
OTU_2248	2248	Proteobacteria	Alphaproteobacteria	Rhizobiales	Methylocystaceae	Pleomorphomonas		0	0	0	0	0	0	0	0	0	0	0	0	0	0	0	0	0	0	0	0	0	0	0	0	0	0	0	0	0	0	0	0	0	0	0	0	0	0	0	0	0	0
OTU_2257	2257	Proteobacteria	Deltaproteobacteria	Myxococcales				0	0	0	0	0	0	0	0	0	0	0	0	0	0	0	0	0	0	0	0	0	0	0	0	0	0	0	0	0	0	0	0	0	0	0	0	0	0	0	0	0	0
OTU_2686	2686	Proteobacteria	Deltaproteobacteria	Bdellovibrionales	Bacteriovoracaceae	Peredibacter		0	0	0	0	0	0	0	0	0	0	0	0	0	0	0	0	0	0	0	0	0	0	0	0	0	0	0	0	0	0	0	0	0	0	0	0	0	0	0	0	0	0
OTU_2695	2695	Proteobacteria	Deltaproteobacteria	Myxococcales				0	0	0	0	0	0	0	0	0	0	0	0	0	0	0	0	0	0	0	0	0	0	0	0	0	0	0	0	0	0	0	0	0	0	0	0	0	0	7.99297e-05	0	0	0
OTU_2811	2811	Proteobacteria	Gammaproteobacteria	Legionellales	Coxiellaceae			0	0	0	0	0	0	0	0	0	0	0	0	0	0	0	0	0	0	0	0	0	0	0	0	7.99297e-05	0	0	0	0	0	0	0	0	0	0	0	0	0	0	0	0	0
OTU_2881	2881							0	0	0	0	0	0	0	0	0	0	0	0	0	0	0	0	0	0	0	0	0	0	0	0	0	0	0	0	0	0	0	0	0	0	0	0	0	0	0	0	0	0
OTU_3242	3242	Proteobacteria	Alphaproteobacteria					0	0	0	0	0	0	0	0	0	0	0	0	0	0	0	0	0	0	0	0	0	0	0	0	0	0	0	0	0	0	0	0	0	0	0	0	0	0	0	0	0	0
OTU_3256	3256	Acidobacteria	unidentified_Acidobacteria	Subgroup_3	PAUC26f			0	0	0	0	0	0	0	0	0	0	0	0	0	0	0	0	0	0	0	0	0	0	0	0	0	0	0	0	0	0	0	0	0	0	0	0	0	0	0	0	0	0
OTU_3284	3284	Proteobacteria	Deltaproteobacteria	Oligoflexales				0	0	0	0	0	0	0	0	0	0	0	0	0	0	0	0	0	0	0	0	0	0	0	0	0	0	0	0	0	0	0	0	0	0	0	0	0	0	0	0	0	0
OTU_3365	3365	Planctomycetes	Phycisphaerae	WD2101_soil_group	unidentified_WD2101_soil_group	unidentified_WD2101_soil_group	planctomycete_WY108	0	0	0	0	0	0	0	0	0	0	0	0	0	0	0	0	0	0	0	0	0	0	0	0	0	0	0	0	0	0	0	0	0	0	0	0	0	0	0	0	0	0
OTU_3390	3390	Proteobacteria	Deltaproteobacteria					0	0	0	0	0	0	0	0	0	0	0	0	0	0	0	0	0	0	0	0	0	0	0	0	0	0	0	0	0	0	0	0	0	0	0	0	0	0	0	0	0	0
OTU_3528	3528	Proteobacteria	Deltaproteobacteria	Bdellovibrionales	Bdellovibrionaceae			0	0	0	0	0	0	0	0	0	0	0	0	0	0	0	0	0	0	0	0	0	0	0	0	0	0	0	0	0	0	0	0	0	0	0	0	0	0	0	0	0	0
OTU_3582	3582	Proteobacteria	Alphaproteobacteria	Rickettsiales	SM2D12			0	0	0	0	0	0	0	0	0	0	0	0	0	0	0	0	0	0	0	0	0	0	0	0	0	0	0	0	0	0	0	0	0	0	0	0	0	0	0	0	0	0
OTU_3835	3835	Elusimicrobia	unidentified_Elusimicrobia	Lineage_IIb				0	0	0	0	0	0	0	0	0	0	0	0	0	0	0	0	0	0	0	0	0	0	0	0	0	0	0	0	0	0	0	0	0	0	0	0	0	0	0	0	0	0
OTU_4096	4096	Proteobacteria	Deltaproteobacteria	Bdellovibrionales	Bdellovibrionaceae			0	0	0	0	0	0	0	0	0	0	0	0	0	0	0	0	0	0	0	0	0	0	0	0	0	7.99297e-05	0	0	0	0	0	0	0	0	0	0	0	0	0	0	0	0
OTU_4230	4230	Proteobacteria	Gammaproteobacteria	Legionellales	Coxiellaceae	Coxiella		0	0	0	0	0	0	0	0	0	0	0	0	0	0	0	0	0	0	0	0	0	0	0	0	0	0	0	0	0	0	0	0	0	0	0	0	0	0	0	0	0	0
OTU_4311	4311	Bacteroidetes	Sphingobacteriia	Sphingobacteriales	Chitinophagaceae			0	0	0	0	0	0	0	0	0	0	0	0	0	0	0	0	0	0	0	0	0	0	0	0	0	0	0	0	0	0	0	0	0	0	0	0	0	0	0	0	0	0
OTU_4438	4438	Proteobacteria	Betaproteobacteria	Rhodocyclales	Rhodocyclaceae	Azoarcus		0	0	0	0	0	0	0	0	0	0	0	0	0	0	0	0	0	0	0	0	0	0	0	0	0	0	0	0	0	0	0	0	0	0	0	0	0	0	0	0	0	0
OTU_4458	4458	Proteobacteria	Deltaproteobacteria	Oligoflexales				0	0	0	0	0	0	0	0	0	0	0	0	0	0	0	0	0	0	0	0	0	0	0	0	0	0	0	0	0	0	0	0	0	0	0	0	0	0	0	0	0	0
OTU_4532	4532	Proteobacteria	Deltaproteobacteria	Oligoflexales				0	0	0	0	0	0	0	0	0	0	0	0	0	0	0	0	0	0	0	0	0	0	0	0	0	0	0	0	0	0	0	0	0	0	0	0	0	7.99297e-05	0	0	0	0
OTU_4550	4550	Proteobacteria	Deltaproteobacteria	GR-WP33-30				0	0	0	0	0	0	0	0	0	0	0	0	0	0	0	0	0	0	0	0	0	0	0	0	0	0	0	0	0	0	0	0	0	0	0	0	0	0	0	0	0	0
OTU_1870	1870	Proteobacteria	TA18					0	0	0	0	0	0	0	0	0	0	0	0	0	0	0	0	0	0	0	0	0	0	0	0	0	0	0	0	0	0	0	0	0	0	0	0	0	0	0	0	0	0
OTU_1894	1894	Planctomycetes	Phycisphaerae	Phycisphaerales	Phycisphaeraceae	SM1A02		0	0	0	0	0	0	0	0	0	0	0	0	0	0	0	0	0	0	0	0	0	0	0	0	0	0	0	0	0	0	0	0	0	0	0	0	0	0	0	0	0	0
OTU_2148	2148	Proteobacteria	TA18					0	0	0	0	0	0	0	0	0	0	0	0	0	0	0	0	0	0	0	0	0	0	0	0	0	0	0	0	0	0	0	0	0	0	0	0	0	0	0	0	0	0
OTU_2454	2454	Acidobacteria	unidentified_Acidobacteria	Subgroup_6				0	0	0	0	0	0	0	0	0	0	0	0	0	0	0	0	0	0	0	0	0	0	0	0	0	0	0	0	0	0	0	0	0	0	0	0	0	0	0	0	0	0
OTU_2514	2514	Proteobacteria	TA18					0	0	0	0	0	0	0	0	0	0	0	0	0	0	0	0	0	0	0	0	0	0	0	0	0	0	0	0	0	0	0	0	0	0	0	0	0	0	0	0	0	0
OTU_2596	2596	Proteobacteria						0	0	0	0	0	0	0	0	0	0	0	0	0	0	0	0	0	0	0	0	0	0	0	0	0	0	0	0	0	0	0	0	0	0	0	0	0	0	0	0	0	0
OTU_2723	2723	Proteobacteria	Alphaproteobacteria	Rickettsiales				0	0	0	0	0	0	0	0	0	0	0	0	0	0	0	0	0	0	0	0	0	0	0	0	0	0	0	0	0	0	0	0	0	0	0	0	0	0	0	0	0	0
OTU_2749	2749	Proteobacteria	Deltaproteobacteria	Myxococcales	Blfdi19			0	0	0	0	0	0	0	0	0	0	0	0	0	0	0	0	0	0	0	0	0	0	0	0	0	0	0	0	0	0	0	0	0	0	0	0	0	0	0	0	0	0
OTU_2758	2758	Proteobacteria	Alphaproteobacteria	Rickettsiales				0	0	0	0	0	0	0	0	0	0	0	0	0	0	0	0	0	0	0	0	0	0	0	0	0	0	0	0	0	0	0	0	0	0	0	0	0	0	0	0	0	0
OTU_2805	2805	Chloroflexi	Ardenticatenia	Ardenticatenales				0	0	0	0	0	0	0	0	0	0	0	0	0	0	0	0	0	0	0	0	0	0	0	0	0	0	0	0	0	0	0	0	0	0	0	0	0	0	0	0	0	0
OTU_2874	2874	Proteobacteria	TA18					0	0	0	0	0	0	0	0	0	0	0	0	0	0	0	0	0	0	0	0	0	0	0	0	0	0	0	0	0	0	0	0	0	0	0	0	0	0	0	0	0	0
OTU_2911	2911	Gemmatimonadetes	unidentified_Gemmatimonadetes	Gemmatimonadales	Gemmatimonadaceae			0	0	0	0	0	0	0	0	0	0	0	0	0	0	0	0	0	0	0	0	0	0	0	0	0	0	0	0	0	0	0	0	0	0	0	0	0	0	0	0	0	0
OTU_2926	2926	Planctomycetes	Phycisphaerae	Phycisphaerales	Phycisphaeraceae	SM1A02		0	0	0	0	0	0	0	0	0	0	0	0	0	0	0	0	0	0	0	0	0	0	0	0	0	0	0	0	0	0	0	0	0	0	0	0	0	0	0	0	0	0
OTU_2959	2959	Proteobacteria	Deltaproteobacteria					0	0	0	0	0	0	0	0	0	0	0	0	0	0	0	0	0	0	0	0	0	0	0	0	0	0	0	0	0	0	0	0	0	0	0	0	0	0	0	0	0	0
OTU_3111	3111	Planctomycetes	Phycisphaerae	Phycisphaerales	Phycisphaeraceae	SM1A02		0	0	0	0	0	0	0	0	0	0	0	0	0	0	0	0	0	0	0	0	0	0	0	0	0	0	0	0	0	0	0	0	0	0	0	0	0	0	0	0	0	0
OTU_3157	3157	Chloroflexi	Ardenticatenia	Ardenticatenales				0	0	0	0	0	0	0	0	0	0	0	0	0	0	0	0	0	0	0	0	0	0	0	0	0	0	0	0	0	0	0	0	0	0	0	0	0	0	0	0	0	0
OTU_3175	3175	Proteobacteria	Deltaproteobacteria	Bdellovibrionales	Bdellovibrionaceae	Bdellovibrio		0	0	0	0	0	0	0	0	0	0	0	0	0	0	0	0	0	0	0	0	0	0	0	0	0	0	0	0	0	0	0	0	0	0	0	0	0	0	0	0	0	0
OTU_3490	3490	Saccharibacteria						0	0	0	0	0	0	0	0	0	0	0	0	0	0	0	0	0	0	0	0	0	0	0	0	0	0	0	0	0	0	0	0	0	0	0	0	0	0	0	0	0	0
OTU_3632	3632	Proteobacteria	Deltaproteobacteria					0	0	0	0	0	0	0	0	0	0	0	0	0	0	0	0	0	0	0	0	0	0	0	0	0	0	0	0	0	0	0	0	0	0	0	0	0	0	0	0	0	0
OTU_3675	3675	Bacteroidetes						0	0	0	0	0	0	0	0	0	0	0	0	0	0	0	0	0	0	0	0	0	0	0	0	0	0	0	0	0	0	0	0	0	0	0	0	0	0	0	0	0	0
OTU_3715	3715	Proteobacteria	Gammaproteobacteria	Xanthomonadales	Solimonadaceae			0	0	0	0	0	0	0	0	0	0	0	0	0	0	0	0	0	0	0	0	0	0	0	0	0	0	0	0	0	0	0	0	0	0	0	0	0	0	0	0	0	0
OTU_3757	3757	Proteobacteria	Deltaproteobacteria	Bdellovibrionales	Bacteriovoracaceae	Peredibacter		0	0	0	0	0	0	0	0	0	0	0	0	0	0	0	0	0	0	0	0	0	0	0	0	0	0	0	0	0	0	0	0	0	0	0	0	0	0	0	0	0	0
OTU_3897	3897	Bacteroidetes	Sphingobacteriia	Sphingobacteriales	Chitinophagaceae			0	0	0	0	0	0	0	0	0	0	0	0	0	0	0	0	0	0	0	0	0	0	0	0	0	0	0	0	0	0	0	0	0	0	0	0	0	0	0	0	0	0
OTU_4151	4151	Proteobacteria						0	0	0	0	0	0	0	0	0	0	0	0	0	0	0	0	0	0	0	0	0	0	0	0	0	0	0	0	0	0	0	0	0	0	0	0	0	0	0	0	0	0
OTU_4231	4231	Bacteroidetes	Flavobacteriia	Flavobacteriales	NS9_marine_group			0	0	0	0	0	0	0	0	0	0	0	0	0	0	0	0	0	0	0	0	0	0	0	0	0	0	0	0	0	0	0	0	0	0	0	0	0	0	0	0	0	0
OTU_4244	4244							0	0	0	0	0	0	0	0	0	0	0	0	0	0	0	0	0	0	0	0	0	0	0	0	0	0	0	0	0	0	0	0	0	0	0	0	0	0	0	0	0	0
OTU_4334	4334	Proteobacteria	Deltaproteobacteria	Oligoflexales				0	0	0	0	0	0	0	0	0	0	0	0	0	0	0	0	0	0	0	0	0	0	0	0	0	0	0	0	0	0	0	0	0	0	0	0	0	0	0	0	0	0
OTU_4412	4412	Proteobacteria	Alphaproteobacteria	Rickettsiales	SM2D12			0	0	0	0	0	0	0	0	0	0	0	0	0	0	0	0	0	0	0	0	0	0	0	0	0	0	0	0	0	0	0	0	0	0	0	0	0	0	0	0	0	0
OTU_4549	4549	Proteobacteria	Alphaproteobacteria	Rickettsiales	Rickettsiaceae			0	0	0	0	0	0	0	0	0	0	0	0	0	0	0	0	0	0	0	0	0	0	0	0	0	0	0	0	0	0	0	0	0	0	0	0	0	0	0	0	0	0
OTU_4667	4667	Chlorobi	Chlorobia	Chlorobiales	OPB56			0	0	0	0	0	0	0	0	0	0	0	0	0	0	0	0	0	0	0	0	0	0	0	0	0	0	0	0	0	0	0	0	0	0	0	0	0	0	0	0	0	0
OTU_4669	4669	Proteobacteria	Gammaproteobacteria					0	0	0	0	0	0	0	0	0	0	0	0	0	0	0	0	0	0	0	0	0	0	0	0	0	0	0	0	0	0	0	0	0	0	0	0	0	0	0	0	0	0
OTU_4733	4733	Verrucomicrobia						0	0	0	0	0	0	0	0	0	0	0	0	0	0	0	0	0	0	0	0	0	0	0	0	0	0	0	0	0	0	0	0	0	0	0	0	0	0	0	0	0	0
OTU_4860	4860	Proteobacteria	Deltaproteobacteria	Myxococcales	Nannocystaceae			0	0	0	0	0	0	0	0	0	0	0	0	0	0	0	0	0	0	0	0	0	0	0	0	0	0	0	0	0	0	0	0	0	0	0	0	0	0	0	0	0	0
OTU_4903	4903	Proteobacteria	Gammaproteobacteria	Oceanospirillales	Halomonadaceae			0	0	0	0	0	0	0	0	0	0	0	0	0	0	0	0	0	0	0	0	0	0	0	0	0	0	0	0	0	0	0	0	0	0	0	0	0	0	0	0	0	0
OTU_12	12	Proteobacteria	Alphaproteobacteria	Rhizobiales	Rhizobiaceae	Ensifer		0	0	0	0	0	0	0	0	0	0.000319719	0	0.000159859	7.99297e-05	0	0	0	7.99297e-05	0.00375669	0.000239789	0	0	0	0	0.000239789	0.000319719	0.000559508	0.000479578	0.000399648	0.000239789	0.000159859	0.422828	0.000159859	0.000479578	0.000479578	0.000159859	7.99297e-05	0	0	0	0	0	0
OTU_29	29	Proteobacteria	Gammaproteobacteria	Pseudomonadales	Moraxellaceae	Acinetobacter		0.0086324	0.00519543	0.00183838	0.00143873	0.00423627	0.100472	0.0407641	0.0158261	0.00223803	0.00503557	0.00167852	0.00119894	0.000159859	0.000399648	0.000239789	0	0.00759332	0.000319719	0.00175845	0.000879226	0.00239789	7.99297e-05	0.00159859	0.000719367	0.00119894	0.000959156	0.000399648	0.000319719	0	0.000159859	0.00359683	0.0152666	0.00119894	0.000719367	0.000319719	0	0.000399648	0.00495564	0	0	7.99297e-05	0
OTU_35	35	Firmicutes	Bacilli	Bacillales	Planococcaceae			7.99297e-05	0	7.99297e-05	0.227959	0.000239789	0	0	0	0.000479578	0	0	0	0	0	0	0.00111902	0.000239789	0.000799297	0.000319719	0	0	0	0	0	0	0	0	0	0	0	0	0	0.000239789	0	0	0	0	0	0	0	0	0
OTU_60	60	Firmicutes	Bacilli	Bacillales	Staphylococcaceae	Staphylococcus	Staphylococcus_epidermidis	0.00631444	0.0274958	0.00719367	0.00583487	0.000159859	7.99297e-05	0.0208616	0.0167053	0.00487571	0.0109504	0.0108704	0.00319719	0.0072736	0.0021581	0.00639437	0.000639437	0.0110303	0.00519543	0.00319719	0.00191831	0.00191831	7.99297e-05	0	0.000159859	7.99297e-05	0.00487571	0.000959156	0.000159859	0.000239789	7.99297e-05	0.0229398	0	0.0013588	7.99297e-05	0.000639437	0.000719367	0.00175845	7.99297e-05	0.000159859	0	0.000159859	7.99297e-05
OTU_31	31	Actinobacteria	unidentified_Actinobacteria	Corynebacteriales	Mycobacteriaceae	Mycobacterium		0	0	0	0.0029574	0	0.0013588	0.00791304	0.0233395	0.00455599	0.0287747	0.00503557	0.0256574	0.0111902	0.00607465	0.0270162	0.0151866	0.0111902	0.00951163	0.00207817	7.99297e-05	7.99297e-05	0.000159859	7.99297e-05	0	7.99297e-05	7.99297e-05	7.99297e-05	0.000159859	0.000159859	7.99297e-05	0	7.99297e-05	0	0.000239789	0	0	0	0.000239789	0.000239789	0.000239789	0.000159859	0.000319719
OTU_33	33	Proteobacteria	Alphaproteobacteria	Sphingomonadales	Sphingomonadaceae	Sphingomonas	Sphingomonas_echinoides	0	0.0127887	0.0391655	0.00199824	0.00407641	0.000319719	0.00959156	0.0115099	0.00519543	0.00639437	0.00231796	0.000719367	0.00719367	0.00495564	0.000879226	0.000319719	0.00375669	0.00263768	0.000319719	0.000959156	0.00103909	0.000719367	0	7.99297e-05	0.000159859	7.99297e-05	0.00503557	0.000159859	0.000479578	0.00311726	0.000159859	0	0.000559508	0.000719367	0	0	0	0	0.00103909	0.000159859	0	7.99297e-05
OTU_37	37	Proteobacteria	Betaproteobacteria	Burkholderiales	Comamonadaceae	Delftia		0.0141476	0	0	0	0	0	0	0	0	0	0.00343698	0.000399648	0.000479578	0.000239789	0.000639437	0.000239789	7.99297e-05	0.000559508	0.000159859	0.0229398	0.0276557	0.00111902	0.0103109	0.00871233	0.00263768	0.00375669	0.0029574	0.000479578	0.000399648	7.99297e-05	0.00159859	0.000639437	0.000319719	0.000159859	0.000639437	7.99297e-05	0.000719367	7.99297e-05	0	7.99297e-05	0	0
OTU_4308	4308	Proteobacteria	Alphaproteobacteria					0.00359683	0.0086324	0.000719367	0.00343698	0.00423627	0.00127887	0.00351691	0.00535529	0.00439613	0.00479578	0.0132683	0.0151067	0.00599472	0.00327712	0.0148669	0.0021581	0.000959156	0.00607465	0.00103909	0	7.99297e-05	0	0	0	0	0.000159859	7.99297e-05	0	0	7.99297e-05	0	7.99297e-05	0.000319719	0	0	0	0	0	0	0	0	0
OTU_1391	1391	Proteobacteria	Gammaproteobacteria	Pseudomonadales	Pseudomonadaceae	Pseudomonas	Pseudomonas_asturiensis	7.99297e-05	0	0	0	0.00319719	0.00383662	0.00255775	7.99297e-05	0	0.000239789	0.000159859	0.00279754	0.000959156	0.000559508	0.00111902	0.00231796	0	0.00551515	0	0.000719367	0.00263768	0.000799297	0.000159859	0.000239789	0.00887219	0.000639437	0.000159859	0.0315722	0.000319719	0.000159859	7.99297e-05	0.00983135	0.000399648	0.00167852	0.000399648	0.00815283	0.000399648	0.000559508	7.99297e-05	0	0.00127887	0.000239789
OTU_73	73	Proteobacteria	Gammaproteobacteria	Enterobacteriales	Enterobacteriaceae	Pantoea	Pantoea_agglomerans	0	0	0.0305331	0.00199824	0	0.00711374	0.00783311	0.000559508	0	0	7.99297e-05	0.00103909	0.000159859	0.000159859	0.000399648	0.00119894	0	0.000559508	7.99297e-05	0.00151866	0.00207817	0.000159859	0.00463592	0.0112701	0.00175845	0.00159859	0.00167852	0.00103909	7.99297e-05	7.99297e-05	7.99297e-05	0.000399648	7.99297e-05	7.99297e-05	0	0.000319719	7.99297e-05	0	7.99297e-05	0.000719367	7.99297e-05	0.000399648
OTU_77	77	Actinobacteria	unidentified_Actinobacteria	Corynebacteriales	Corynebacteriaceae	Corynebacterium_1	Corynebacterium_tuberculostearicum	0.0211014	0.00119894	0.0157461	0.000879226	0	0.00471585	0.00351691	0.0123092	0.0021581	0	0.00263768	0.000319719	0.000639437	0.0043162	0.000239789	0	0.00391655	0.000639437	0.000239789	0	7.99297e-05	0.000159859	0	0	7.99297e-05	0	0	0.000719367	0	0	0.000399648	0	0	0.000159859	0	0	0	0	0	7.99297e-05	0.000159859	7.99297e-05
OTU_45	45	Bacteroidetes	Sphingobacteriia	Sphingobacteriales	Sphingobacteriaceae	Sphingobacterium	Sphingobacterium_multivorum	0	0	0	0	0	0	0	0	0.00103909	0	0.000399648	0.000319719	0.000319719	0.000239789	7.99297e-05	0	0	7.99297e-05	0	0.00207817	0.00159859	0	0.0311726	0.0164655	0.00351691	0.00783311	0.00375669	0.000719367	0.000559508	0.000159859	0.000159859	0.00311726	0.000319719	7.99297e-05	0.000159859	7.99297e-05	0.000399648	7.99297e-05	0.000159859	0.000319719	0	0
OTU_46	46	Proteobacteria	Gammaproteobacteria	Xanthomonadales	Nevskiaceae	Hydrocarboniphaga		0	0	0	0	0	7.99297e-05	7.99297e-05	0.000799297	7.99297e-05	0	0.00127887	0.0107905	0.000319719	0.000639437	0.00159859	0.00223803	0	0.0438814	0.00127887	0.0013588	0.00271761	0.000879226	0.00319719	7.99297e-05	0.000159859	0.000159859	0.000239789	0	0	0.000239789	0.000159859	0.000319719	0	0.000159859	0.000159859	0	0.000319719	7.99297e-05	7.99297e-05	0	0	7.99297e-05
OTU_113	113	Actinobacteria	unidentified_Actinobacteria	Micrococcales	Brevibacteriaceae	Brevibacterium	Brevibacterium_casei	0.0244585	0.00695388	7.99297e-05	0.000799297	0	0.0107106	0.0043162	0.00231796	0.00119894	0.0133483	0.00527536	0.000959156	0.000959156	0	0.000559508	0	0	0	7.99297e-05	0	0	7.99297e-05	0	7.99297e-05	0	0.00143873	7.99297e-05	0	7.99297e-05	0	0	7.99297e-05	0	0	0.000239789	0	0	0	0	0	0	0
OTU_49	49	Firmicutes	Bacilli	Lactobacillales	Carnobacteriaceae	Trichococcus	Trichococcus_collinsii	0	0.00327712	0	0.00351691	0	0	0	0	0.000159859	0	0	0.000479578	0.0183039	0.000239789	0.000159859	7.99297e-05	0	0.000159859	0	0	0	0.000319719	0	0	0.000319719	0	0	0	0.000159859	0	0	0	0	0	0	0	7.99297e-05	0.0422828	7.99297e-05	0	0	7.99297e-05
OTU_43	43	Proteobacteria	Alphaproteobacteria	Rhizobiales	Methylobacteriaceae	Microvirga		0	0	0	0	0	0	0	0	0	0	7.99297e-05	0	0	0.0591479	0.000159859	0	0	0	0	7.99297e-05	0	0	0	0	0	0	0.00247782	0	0	0	0	0	0	0	0	0	0	0	0	0.000399648	0	0
OTU_4546	4546	Proteobacteria	Betaproteobacteria	SC-I-84				0	0	0	0	0	0	0	0	0	0	0	0	0	0	7.99297e-05	0	0	0.000159859	0	0	0	0	0	0	0	7.99297e-05	0	0	0	0	0	0	0	0.000159859	7.99297e-05	0	7.99297e-05	7.99297e-05	0.00175845	0.00167852	0.00199824	0.0043162
OTU_212	212	Proteobacteria	Gammaproteobacteria	Enterobacteriales	Enterobacteriaceae			0	0.00487571	0.00231796	0	0.00791304	0.000159859	0.00839261	0.00543522	0.00103909	0.00391655	0.00191831	0.0013588	0.00271761	0.00599472	0.00159859	0.000399648	0.00143873	0.00247782	0	0	0.000959156	7.99297e-05	0.000479578	0.000239789	0.000159859	0.000479578	7.99297e-05	0.000239789	7.99297e-05	0	7.99297e-05	7.99297e-05	0.000479578	7.99297e-05	0.000239789	0	0.000399648	0	0	0.000159859	0	0
OTU_90	90	Actinobacteria	unidentified_Actinobacteria	Micrococcales	Brevibacteriaceae	Brevibacterium		0	0	0	0	0	0.000319719	0	7.99297e-05	0	0.0525138	0	0	0	0	0	0	0	0	0	0	0	0	0	0	0	0	0	0	0	0	0	0	0	0	0	0	0	0	0	0	0	0
OTU_75	75	Proteobacteria	Alphaproteobacteria	Rhizobiales	Brucellaceae	Ochrobactrum	Ochrobactrum_anthropi	0.00375669	0	0	0	0	0.00159859	0.00543522	0.00247782	0.00111902	0	0.00495564	0.000159859	0.00183838	0.00535529	0.000639437	0.00791304	0.000639437	0.00855247	0.00111902	0.0021581	7.99297e-05	0	7.99297e-05	0.000159859	0	0.000719367	0.000239789	0	0.000239789	0	0	7.99297e-05	7.99297e-05	0	0.000159859	0	0	0.00167852	0	7.99297e-05	0	0.000159859
OTU_138	138	Proteobacteria	Gammaproteobacteria	Enterobacteriales	Enterobacteriaceae			0	0	7.99297e-05	0	0	0	7.99297e-05	0.00111902	0	7.99297e-05	0.000319719	0.000159859	0.000399648	7.99297e-05	0.00191831	0	0	0.00623451	7.99297e-05	0.000399648	0.0013588	0.000239789	0.0139078	0.0131085	0.00111902	0.00207817	0.00287747	0.000399648	0.000159859	0	7.99297e-05	0.000479578	0.00103909	0.000239789	0.000159859	0	0.00199824	0	0	0	7.99297e-05	0
OTU_48	48	Acidobacteria	unidentified_Acidobacteria	Subgroup_4	unidentified_Acidobacteria	Blastocatella		0	0	0	0	0	0	0	0	0	0	0	0	0	0.000639437	0	0	0	0	0	0	0	0	0	0.000319719	0.000319719	0.000239789	0.0438814	0.000319719	7.99297e-05	0	0.000319719	0	7.99297e-05	7.99297e-05	0.000159859	0	0	0	0	0.000879226	0	0
OTU_3919	3919	Firmicutes	Bacilli	Bacillales	Planococcaceae	Sporosarcina		0	0	0.000239789	0.0112701	0	0	0.00423627	7.99297e-05	7.99297e-05	0	0	0.00183838	0.00287747	0.000239789	0.00183838	0.00143873	0.0148669	7.99297e-05	0.000319719	0	0.000319719	7.99297e-05	0	7.99297e-05	0	0.000559508	0.000559508	0.000159859	0.000399648	7.99297e-05	0	7.99297e-05	0.000319719	0.00119894	0	0	0	0	0.000559508	0.000399648	0.000559508	7.99297e-05
OTU_69	69	Deinococcus-Thermus	Deinococci	Deinococcales	Deinococcaceae	Deinococcus		0.00519543	0.00519543	0.0161458	0	0.0183039	0	0	0	0	7.99297e-05	0	0	0	0	0	0	0	0	0	0.000239789	0.000319719	0	0	0	0	0	0	0	0	0	0	0	0	0	7.99297e-05	0	0	0	0	0	0	0
OTU_125	125	Firmicutes	Bacilli	Lactobacillales	Streptococcaceae	Streptococcus		0	0.00239789	0.0177444	7.99297e-05	0	0	0.0103109	0	0.00239789	0	0.00247782	0.000879226	7.99297e-05	0	0.00127887	0.000959156	0	0.000799297	7.99297e-05	0	0.000239789	0	0	0	0.000159859	0.000719367	0	0	0	0	0	0.000559508	0.000559508	0.000799297	0	0	0	0	0	0	0	0
OTU_1264	1264	Firmicutes	Bacilli	Bacillales	Bacillaceae	Bacillus		0	0	0	0	0	0	0.00319719	0	0	0	0.0123092	0.000239789	0.00383662	0.0127887	0.00127887	0	0	0	0	0	0	0	0	0	7.99297e-05	0	0	0	0	0.0021581	0	0	0	0	0	0	0	0	7.99297e-05	0	7.99297e-05	0
OTU_1630	1630	Proteobacteria	Betaproteobacteria	Burkholderiales	Comamonadaceae	Comamonas	Comamonas_koreensis	0	0	0	0	0	0	0	0	0	0	7.99297e-05	7.99297e-05	7.99297e-05	7.99297e-05	0	0	0	0	0	0	0.000879226	0	0.0179042	0.00695388	0.00175845	0.00127887	0.00447606	0.000879226	0.000159859	0	0	0.000799297	0	7.99297e-05	0	0	0	0	0	0	0	0
OTU_82	82	Proteobacteria	Alphaproteobacteria	Rhodobacterales	Rhodobacteraceae	Paracocccus	Paracoccus_yeei	0	0	0	0	0	0	0	0	0	0	0.00159859	7.99297e-05	0.000159859	0	0	0	7.99297e-05	0.0322916	7.99297e-05	7.99297e-05	0	0	0	0	0	0	0	0	0	0	0.000239789	7.99297e-05	0	0	0	0	7.99297e-05	0	0	0	0	0
OTU_111	111	Actinobacteria	unidentified_Actinobacteria	Micrococcales	Intrasporangiaceae	Janibacter		0.0111102	0	0.00591479	0.00471585	0	0	0	7.99297e-05	0.000959156	0	0.00599472	0.00239789	0.000159859	0	7.99297e-05	0	0	0.000639437	0.000319719	0	0	0	0	0	0.000159859	0.000239789	0	0	7.99297e-05	0.00127887	7.99297e-05	0	0	0.000399648	0	0	0	0	0	0	0	0
OTU_80	80	Actinobacteria	unidentified_Actinobacteria	Micrococcales	Micrococcaceae	Arthrobacter	Arthrobacter_oryzae	0	0	0	0	0	0	0	0	0	0	0	0	7.99297e-05	7.99297e-05	7.99297e-05	0	0	7.99297e-05	0	0	0.000319719	0	0	0	0	7.99297e-05	0	7.99297e-05	0	0	7.99297e-05	0	0	0	0	0	7.99297e-05	0.000159859	0.00159859	0.00239789	0.00463592	0.000959156
OTU_109	109	Actinobacteria	unidentified_Actinobacteria	Corynebacteriales	Corynebacteriaceae	Corynebacterium_1		0	0.00223803	0	0.00359683	0.00231796	0	0.00191831	7.99297e-05	0	0	0	0.00119894	0.00223803	0	0.00735353	0	0	0.00271761	0.000159859	0.000959156	0	0	0	0	0	0	0.000559508	0.000239789	7.99297e-05	0.0043162	0.000159859	0	0	7.99297e-05	0	0	0	0.00183838	0	0	7.99297e-05	0
OTU_83	83	Proteobacteria	Alphaproteobacteria	Rhizobiales	Phyllobacteriaceae	Phyllobacterium	Phyllobacterium_myrsinacearum	0	0.00847254	0	0	0.0108704	0	7.99297e-05	0	0	0	0	0	0	0	7.99297e-05	0	0.00263768	0.00191831	0.000319719	0	0	0	0	7.99297e-05	0.000719367	0.00111902	0.000559508	0.000159859	0.000159859	0	0.00231796	0.000159859	0	0.000159859	0.000319719	7.99297e-05	0	0	7.99297e-05	7.99297e-05	0.000159859	0.000159859
OTU_71	71	Firmicutes	Bacilli	Lactobacillales	Enterococcaceae	Enterococcus		0	0	0	0	0	0	0	0	0	0	7.99297e-05	0.000159859	0.0013588	0	7.99297e-05	7.99297e-05	0.0297338	0	0	0	0	0	0	0	0	0	0	0	0	7.99297e-05	0	0	0	0	0	0	0	7.99297e-05	0	0	0	0
OTU_127	127	Proteobacteria	Betaproteobacteria					0	0	0	0	0	0	0	0	0	0	0	0	0	0	0	0	0	0	0	0	7.99297e-05	0	0	0	0	0	7.99297e-05	0	0	0	0	0	0	0	0	0	7.99297e-05	7.99297e-05	7.99297e-05	0.000239789	0	7.99297e-05
OTU_170	170	Actinobacteria	unidentified_Actinobacteria	Corynebacteriales	Corynebacteriaceae	Corynebacterium		0.0104708	0	0	0	0	0	0	0.00423627	0	0.00471585	0.00199824	0.00111902	0.000159859	0	7.99297e-05	0.00263768	7.99297e-05	0.00319719	0	0	0	0	0	0	0	0	0	0	0	0	0.00143873	0	0	0.000239789	0	0	0	0	0	0	0	0
OTU_163	163	Firmicutes	Clostridia	Clostridiales	Peptostreptococcaceae	Terrisporobacter		0	0.0251778	0	0	0	0	7.99297e-05	0	0	0	0	0	0	7.99297e-05	0	0	0	0	0	0	0	0	0	0	7.99297e-05	0	0.00119894	0	0.000159859	0	0	0	0	0	0	0	0	0	0	0.000239789	0.000159859	0.000159859
OTU_84	84	Proteobacteria	Betaproteobacteria	SC-I-84				0	0	0	0	0	0	0	0	0	0	0	0	0	0	0.000479578	0	0	7.99297e-05	0	0	0	0	0	0	0	0	7.99297e-05	7.99297e-05	0	0	0	0	0	0	0	0	7.99297e-05	0	0.00279754	0.00247782	0.0029574	0.00359683
OTU_91	91	Proteobacteria	Betaproteobacteria	Burkholderiales	Comamonadaceae	Tepidimonas		0	0	0.000319719	0	0	0	0	0	0	0	0	0.0021581	0.00399648	0.000879226	7.99297e-05	7.99297e-05	0.0174247	0.00199824	0	7.99297e-05	0	0	0	0	0	0	0	0	7.99297e-05	0	0	0	0	0	0	0	0	0	0	0	0	0
OTU_154	154	Proteobacteria	Alphaproteobacteria	Rhizobiales	Brucellaceae	Ochrobactrum	Ochrobactrum_pseudogrignonense	0	0	0.0267764	0	0	7.99297e-05	7.99297e-05	0.000239789	0	0	0	0	0	0	7.99297e-05	0	0	7.99297e-05	0	0	0	0	0	0	0	0	0	0	0	0	0	0	0	0	0	0	0	0	0	0	0	0
OTU_106	106	Proteobacteria	Betaproteobacteria	Burkholderiales	Burkholderiaceae	Cupriavidus		0	0.00359683	0	0	0.0115898	0	0.00199824	0.000879226	0	7.99297e-05	7.99297e-05	0.00343698	7.99297e-05	0	7.99297e-05	0	0	0.0021581	0	0.000559508	0	0	0	0	0.000159859	0.000639437	0	0	0	0	7.99297e-05	0	0	0.000159859	0	0	0.000479578	7.99297e-05	0	7.99297e-05	0	0.000159859
OTU_94	94	Actinobacteria	unidentified_Actinobacteria	Corynebacteriales	Corynebacteriaceae			0	0.00559508	0	0	0.00991128	0	0	0	0	0	0	0.00447606	0.00343698	0	0.000799297	0.000319719	0	0	0.000239789	7.99297e-05	0	0	0	7.99297e-05	0	0	0.000399648	0	7.99297e-05	0	0.000399648	0.000319719	0	0.000319719	0.000159859	7.99297e-05	0	0	0	7.99297e-05	0	0
OTU_204	204	Acidobacteria	unidentified_Acidobacteria	Acidobacteriales	Acidobacteriaceae_.Subgroup_1.			0	0	7.99297e-05	0	0.0219007	0	0	0	0	0	0	0	0	0	0	0	0	0	0	0	0	0	0	0	0	0	0	0	0	0	0	0	0	0	0	0	0	0	0	0	0	0
OTU_118	118	Proteobacteria	Gammaproteobacteria	Xanthomonadales	Nevskiaceae	Nevskia		0	0	0	0.0013588	0	0.000879226	0.00359683	0.00239789	0	0	0.0043162	0.00279754	0.00751339	0.000959156	0.000719367	0.000559508	0	0.000159859	0	0	0	0	0	0	0	0	0	0	0	0	0	0	0	0	0	0	0	7.99297e-05	0	0	0	0
OTU_105	105	Firmicutes	Bacilli	Bacillales	Bacillaceae	Anoxybacillus		0	0	0.0199025	0	0	0.00183838	0	0	0	0	0	0	0	0	0.000319719	0	0.00335705	0	0	0	0	0	0	0	0	0	0	0	0	0	0	0	0	0	0	0	0	0	0	0	0	0
OTU_2177	2177	Actinobacteria	unidentified_Actinobacteria	Corynebacteriales	Corynebacteriaceae	Corynebacterium_1	Corynebacterium_segmentosum	0	0	0.000159859	0	0	0	7.99297e-05	0.0103909	0	0.013668	0	0.000399648	0	7.99297e-05	0	0	0	7.99297e-05	0	0	0	0	0	0	0	0	0	0	0	0	0	7.99297e-05	0	0	0	0	0	7.99297e-05	0	0	0	0
OTU_998	998	Actinobacteria	Thermoleophilia	Solirubrobacterales	Solirubrobacteraceae	Solirubrobacter		0	0	0	0	0	0	0	0	0.000559508	0	0	0.000799297	7.99297e-05	0	0	0	7.99297e-05	0.00151866	0	0	0	0	0	0	0	7.99297e-05	0	0.000239789	0	0	0	0	0	7.99297e-05	0	0	0	0	0.0013588	0.00143873	0.000799297	0.000719367
OTU_155	155	Firmicutes	Bacilli	Lactobacillales	Streptococcaceae	Streptococcus	Streptococcus_salivarius_subsp._thermophilus	0.00487571	0	0	0.000159859	7.99297e-05	0	0.0114299	0	0.00207817	0	0	0.000239789	0	0	0	0	0	0	7.99297e-05	0	0	0	0	0	0	7.99297e-05	0	0	0	0.00239789	0	7.99297e-05	7.99297e-05	0.000479578	0	0	0	0	0	0	0	0
OTU_121	121	Actinobacteria	Thermoleophilia	Solirubrobacterales	Q3-6C1			0	0	0	0	0	0	0	0	0	0	0	0	0.000159859	0	0.00311726	7.99297e-05	0	0	0	7.99297e-05	0	0	0	0	0	0	0	0.000159859	0	0	0	0.000159859	0	0	0	0	7.99297e-05	0	0.00175845	0.00255775	0.000799297	0.000959156
OTU_145	145	Bacteroidetes	Flavobacteriia	Flavobacteriales	Flavobacteriaceae	Chryseobacterium	Chryseobacterium_hominis	0	0	0	0	0	0.000159859	0	0	0.00391655	7.99297e-05	0.000239789	0.000159859	0.000159859	0.000159859	0	0.00175845	0	7.99297e-05	0	0.000239789	0.000319719	0	0.00415634	0.0029574	0.000559508	0.00119894	0.00151866	0.000319719	0	0	0	0.000479578	7.99297e-05	0	0	0	0.000159859	0	0	0.000319719	0	0
OTU_126	126	Actinobacteria	unidentified_Actinobacteria	Micrococcales	Micrococcaceae	Rothia		0.00935177	0	0	0	0	0	0	0	0	0	0	0.000399648	0	0	0.000159859	0	0	0.00167852	0.000639437	0	0	0	7.99297e-05	7.99297e-05	0	0	0	0	0	0	0	0	0	0	0	0	0	0.00687395	0	7.99297e-05	0	0
OTU_2215	2215	Actinobacteria	unidentified_Actinobacteria	Propionibacteriales	Propionibacteriaceae	Propionibacterium		7.99297e-05	0.00103909	7.99297e-05	0	0	0	0.00351691	0.00287747	0.000479578	0.000719367	0.000639437	0.00247782	0.00207817	0.00175845	0.00287747	0.000559508	0	0.000159859	0	0	0	0	0	0	0	0	0	0	0	0	0	0	0	0	0	0	0	0	0	0	0	0
OTU_330	330	Actinobacteria	Thermoleophilia	Solirubrobacterales	Solirubrobacteraceae	Solirubrobacter		0	0	0	0.00191831	0	0	0	0	0	0	0	0	0	0	0	0	0	7.99297e-05	0	0.000159859	7.99297e-05	0	0	0	0	7.99297e-05	0	0	7.99297e-05	0	0	0	0	0	0	0	0	0	0.00175845	0.00151866	0.000559508	0.000799297
OTU_149	149	Firmicutes	Bacilli	Lactobacillales	Aerococcaceae	Aerococcus		0	0	0	0	0	0	0	0	0	0.00223803	0.00167852	7.99297e-05	7.99297e-05	0.00159859	7.99297e-05	0	0.00783311	0.000719367	0.000479578	0	0	0.000959156	0.000159859	0	0	0.00207817	0	0	0	7.99297e-05	0	0	0	0	0	0	0	0	7.99297e-05	0	0	0
OTU_271	271	Actinobacteria	unidentified_Actinobacteria	Propionibacteriales	Nocardioidaceae	Aeromicrobium		0	0	0	0.000239789	0	0	0	0	0.00423627	0	0	0.00183838	0.000159859	0.000159859	7.99297e-05	0.00167852	0	0.00239789	0.000319719	0.00287747	0	0	0	0	0.000319719	0	0.000319719	7.99297e-05	7.99297e-05	0	0	0	7.99297e-05	0	0	0	0.000159859	7.99297e-05	0.000479578	0.000399648	0	0.000159859
OTU_142	142	Acidobacteria	unidentified_Acidobacteria	Subgroup_2				0	0	7.99297e-05	0	0.0171049	0	0	0	0	0	0	0	0	0	0	0	0	0	0	0	0	0	0	0	0	0	0	0.000159859	0	0	0	0	0	0	0	0	0	0	0	7.99297e-05	7.99297e-05	0
OTU_188	188	Bacteroidetes	Flavobacteriia	Flavobacteriales	Flavobacteriaceae	Gillisia		0	0	0	0.00167852	0	0	0	0	0	0	0	7.99297e-05	7.99297e-05	0.00255775	0.000239789	0	0.012549	7.99297e-05	0	0	0	0	0	0	0	0	0	0	0	0	0	0	0	0	7.99297e-05	0	0	0	0	0	0	0
OTU_141	141	Actinobacteria	unidentified_Actinobacteria	Micrococcales	Intrasporangiaceae	Terrabacter		0	0	0	0	0	0	0	0	0	0	0	0	0	0	7.99297e-05	0	0	0	0	0	0	0	0	0	0	7.99297e-05	7.99297e-05	7.99297e-05	0	0	0	0	0	0	0	0	7.99297e-05	7.99297e-05	0.000639437	0.000639437	0.000399648	0.000719367
OTU_4450	4450	Gemmatimonadetes	unidentified_Gemmatimonadetes	AT425-EubC11_terrestrial_group				0	0	0	0	0	0	0	0	0	0	0	0	0.000159859	0	0	0	0	0	0	7.99297e-05	0	0	0	0	0	0	0	0	0	0	0	0	0	0	0	0	0	0	0.0013588	0.000799297	0.000399648	0.0021581
OTU_4258	4258	Actinobacteria	unidentified_Actinobacteria	Corynebacteriales	Corynebacteriaceae	Corynebacterium_1	Corynebacterium_singulare	0	0	0	0	0	0	0.00551515	0	0	0	0	0	0	0.00703381	0	0	0.00415634	0.000399648	0	0	0	0	0	0	0	0	0	0	0	0	0	0	7.99297e-05	0	0	0	0	0	0	0	0	0
OTU_384	384	Proteobacteria	Alphaproteobacteria	Rhizobiales	Xanthobacteraceae			0	0	0	0	0.00535529	0	0	0	0	0	0	0	0	0	7.99297e-05	0	0	0	0	0	0	0	0	0	7.99297e-05	0	0	0	0	0	0	0	0	0	0	0	0	7.99297e-05	0.000799297	0.000799297	0.000559508	0.000319719
OTU_259	259	Firmicutes	Clostridia	Clostridiales	Peptostreptococcaceae	Filifactor		0	0	0	0	0	0	7.99297e-05	0	0	0.0155863	0	0	0	0	0	0	0	0	0	0	0	0	0	0	0	0	0	0	0	0	0	0	0	0	0	0	0	0	0	0	0	0
OTU_4858	4858	Proteobacteria	Gammaproteobacteria	Pseudomonadales	Pseudomonadaceae	Pseudomonas		0.000239789	0.000559508	0	7.99297e-05	0.000239789	0.000799297	0.00103909	0.000399648	0	0	7.99297e-05	0	0	0.00143873	7.99297e-05	0.000159859	0	0.000959156	0.000159859	0.000399648	0.000639437	7.99297e-05	0.00383662	0.00199824	0.000559508	0.000639437	0.000559508	7.99297e-05	7.99297e-05	7.99297e-05	7.99297e-05	0.000159859	7.99297e-05	7.99297e-05	7.99297e-05	0	0	0	0	0	0	0
OTU_249	249	Proteobacteria	Alphaproteobacteria	Rhizobiales	Methylobacteriaceae	Methylobacterium	Methylobacterium_mesophilicum	0	0.00271761	0	0	0	0	0	0	0.00799297	0	7.99297e-05	0.000319719	0	0.000399648	0.000159859	0	0	7.99297e-05	0.000159859	0	0	0	0.000239789	0	7.99297e-05	0	0	0.000159859	0.000159859	0	0	0	0	7.99297e-05	0	0	0	0	0.000319719	7.99297e-05	7.99297e-05	7.99297e-05
OTU_1746	1746	Proteobacteria	Betaproteobacteria	Burkholderiales	Alcaligenaceae			0	0	0	0	0	0	0	0	0	0	0	0	0	0	7.99297e-05	0	0	0	0	0	0	0	0	0	0	0	0	0	0	0	0	0	0	0	0	0	0.000159859	0	0.00111902	0.000879226	0.00263768	0.00303733
OTU_213	213	Firmicutes	Bacilli	Bacillales	Paenibacillaceae	Paenibacillus		0	0	0	0	0	0.00879226	0	7.99297e-05	0	0	7.99297e-05	7.99297e-05	0	0	0	0.00471585	0	7.99297e-05	0	0	0	0	0	0	0	0	0	0	7.99297e-05	0	0	0	0	0	0.000319719	0	0	0	7.99297e-05	0	0	0
OTU_424	424	Proteobacteria	Betaproteobacteria					0	0	0	0	0	0	0	0	0	0	0	0	7.99297e-05	0	0	0	0	0	0	7.99297e-05	0	0	0	0	0	0	0	0	0	0.000159859	0	0	0	0	0	0	0	7.99297e-05	0.000399648	0.00119894	0.000399648	0.000959156
OTU_1369	1369	Gemmatimonadetes	unidentified_Gemmatimonadetes	Gemmatimonadales	Gemmatimonadaceae	Gemmatimonas		0	0	0	0	0	0	0	0	0	0	0	0	0	0	0	0	0	0	0	0	0	0	0	0	0	0	7.99297e-05	0	0	0.000159859	0	0	0	0	0	0	0	0	0.00159859	0.00207817	0.000959156	0.00159859
OTU_239	239	Proteobacteria	Alphaproteobacteria	Rhizobiales	Xanthobacteraceae	Pseudolabrys		0	0	0	0	0	0	0	0	0	0	0	0	7.99297e-05	0	7.99297e-05	0.000399648	0	0.00887219	7.99297e-05	0	0	0	0	0	0	0	0	0	0	0	0	0	0	0	0	0	0	0	7.99297e-05	7.99297e-05	7.99297e-05	7.99297e-05
OTU_4483	4483	Proteobacteria	Alphaproteobacteria					0.000239789	0.000159859	0	0	0.000239789	0	0.000239789	7.99297e-05	7.99297e-05	0	0	7.99297e-05	7.99297e-05	0	7.99297e-05	0.000159859	7.99297e-05	0.000319719	0	0.000159859	0.000159859	0	0	0	0	0.000159859	0	0.000159859	0.00175845	0.000159859	0.000319719	0	0.000159859	0.00903205	0	0	0	0	0	0	0	0
OTU_169	169	Acidobacteria	unidentified_Acidobacteria	Acidobacteriales	Acidobacteriaceae_.Subgroup_1.	Telmatobacter		0	0	0.000159859	0	0.0134282	0	0	0	0	0	0	0	0	0	0	0	0	0	0	0	0	0	0	0	0	0	0	0	0	0	0	0	0	0	0	0	0	0	0	0	0	0
OTU_140	140	Acidobacteria	unidentified_Acidobacteria	Subgroup_11				0	0	0	0	0	0	0	0	0	0	0	0	0.000159859	0	7.99297e-05	0	0	0	0	0	0	0	0	0	0	0	0	0	0	0	0	0	0	0	0	0	0	0	0.000959156	0.00103909	0.00167852	0.00159859
OTU_182	182							0	7.99297e-05	0	0	0.0134282	0	0	0	0	0	0	0	0	0	0	0	0	0	0	0	0	0	0	0	0	0	0	0	0	0	0	0	0	0	0	0	0	0	0	0	0	0
OTU_317	317	Proteobacteria	Betaproteobacteria	Neisseriales	Neisseriaceae	Neisseria		0	0.00231796	0	0	0	0	0	0	0	0	0.00775318	0.00167852	0	0	7.99297e-05	0	0	7.99297e-05	0.00103909	0	0.000159859	0	0	7.99297e-05	0	0	0	0	0	0	0	0	0	0	0	0	0	0	0	0	0	0
OTU_197	197	Proteobacteria	Alphaproteobacteria	Rhizobiales	Rhodobiaceae			0	0	0	0	0	0	0	0	0	0	0	0	0	0	0	0	0	0	0	0	0	0	0	0	0	7.99297e-05	0	0	0	0	0	0	0	0	0	0	0	0	0.000479578	0.000959156	0.000799297	0.000559508
OTU_279	279	Actinobacteria	unidentified_Actinobacteria	Corynebacteriales	Corynebacteriaceae	Corynebacterium	Corynebacterium_durum	0	0	0	0	0	0	0.00487571	0	0	0	0	0.000319719	0.000159859	0.00399648	0.000559508	0	0	0.0029574	0	0	0	0	0	0	0	0	0	0	0	0	0	0	0	0	0	0	0	0	0	7.99297e-05	0	0
OTU_168	168	Proteobacteria	Alphaproteobacteria	Rhodobacterales	Rhodobacteraceae			0	0	0.00223803	0	0	0	0	0	0	0.000319719	7.99297e-05	0.00151866	0.00223803	0.000799297	0.000639437	0.000639437	0.00383662	0	7.99297e-05	0	0	0	0	0	0	0	0	0	0	7.99297e-05	0	0	0	0	0	0	0	0	0	0	0	0.000159859
OTU_1397	1397	Proteobacteria	Alphaproteobacteria	Rhizobiales	Phyllobacteriaceae	Mesorhizobium		0	0	0	0	0	0	0	0	0	0	0	0	0	0	0	0	0	0	0	0	0	0	0	0	0.000159859	0.000159859	0	0.000159859	0	0	0	7.99297e-05	0	0	0	0	0	7.99297e-05	0.000479578	0.000399648	0.000879226	0.000479578
OTU_1312	1312	Proteobacteria	Alphaproteobacteria	Rhizobiales	Rhizobiaceae	Rhizobium		0	0	0.00839261	0	0	0	0	0	0	0	0	7.99297e-05	0	0	7.99297e-05	0	0	0	0.000319719	0.00183838	0.000479578	7.99297e-05	0.000639437	0.000159859	0.000159859	0	0	0	0	0	7.99297e-05	0	0	7.99297e-05	0	7.99297e-05	0	0	0	0	0	0
OTU_256	256	Proteobacteria	Deltaproteobacteria					0	0	0	0	0	0	0	0	0.0110303	0	0	0	0	0	0	0	0	0	0	0	0	0	0	0	0	0	0	0	0	0	0	0	0	0	0	0	7.99297e-05	0	0.00111902	0	0	0
OTU_4071	4071	Bacteroidetes	Flavobacteriia	Flavobacteriales	Flavobacteriaceae	Chryseobacterium		0.000159859	0	0	0	0.000159859	0	0	0	0	0	0	0.000239789	0.000159859	0.000159859	7.99297e-05	0	0	0.000319719	0.000399648	0	0.000399648	7.99297e-05	0	0	7.99297e-05	7.99297e-05	7.99297e-05	0.000479578	7.99297e-05	0	0.000159859	7.99297e-05	0.000239789	0	7.99297e-05	7.99297e-05	7.99297e-05	0	0.000319719	0.000639437	7.99297e-05	0.000399648
OTU_187	187	Actinobacteria	unidentified_Actinobacteria	Corynebacteriales	Dietziaceae	Dietzia	Dietzia_maris	0	0.00367676	0	0	0	0	7.99297e-05	0	0	0	0.00439613	7.99297e-05	0	0	0	7.99297e-05	0.00375669	0	0	0	7.99297e-05	0	0	0	7.99297e-05	0	0	0	0	0	0	0	0	0	0	0	7.99297e-05	0	0	0	0	0
OTU_583	583	Proteobacteria	Betaproteobacteria	SC-I-84				0	0	0	0	0	0	0	0	0	0	0	0	0	0	0	0	0	0	0	0	0	0	0	0	0	7.99297e-05	0	0	0	0	0	0	0	0	0	0	0	7.99297e-05	0	0	7.99297e-05	0
OTU_237	237	Actinobacteria	Thermoleophilia	Solirubrobacterales	Patulibacteraceae	Patulibacter		0	0	0	0	0	0	0.000479578	0	0.000479578	0	0.000479578	0.00111902	0.00111902	0	0.00127887	0	0	0.0051155	0.00143873	0	0	0.000239789	0	0	0	0	0	0	0	0	0	0	0	0	0	0	0	0	0	0	7.99297e-05	0
OTU_652	652	Proteobacteria	Betaproteobacteria	SC-I-84				0	0	0	0	0	0	0	0	0	0	0	0.000159859	7.99297e-05	0	7.99297e-05	0	0	0	0	0	0	0	0	0	0	0	0	0	0	0	7.99297e-05	0	0	7.99297e-05	0	0	0	0	0.000479578	0.000479578	0.000159859	0.000879226
OTU_396	396	Firmicutes	Bacilli	Bacillales	Bacillaceae	Bacillus	Bacillus_cohnii	0.000159859	0	0	0.000639437	0.00143873	0	0.000719367	0.000959156	0	0.00151866	0	0.000159859	7.99297e-05	0.00487571	0	0	0	0	0	0	0.000239789	0	0	0	0	0	0.000159859	0	0	0	0	0.000159859	0	0	0	0	0	0	0	7.99297e-05	0.000239789	0.000159859
OTU_215	215	Actinobacteria	unidentified_Actinobacteria	Pseudonocardiales	Pseudonocardiaceae	Crossiella		0	0	0	0	0	0.00223803	0.000479578	0	0	0	0.000559508	0	0.00127887	0	0.00119894	0	0.00167852	0.00143873	7.99297e-05	0	7.99297e-05	0	0	0	0	0.000239789	7.99297e-05	0.00191831	7.99297e-05	0	0	0	7.99297e-05	0	0	0	0.000479578	0	0	7.99297e-05	0	7.99297e-05
OTU_2549	2549	Firmicutes	Clostridia	Clostridiales	Peptostreptococcaceae	Romboutsia		0	0	0.00567501	0	0	0	0.00327712	0	0	0	0	7.99297e-05	0	0	0	0	7.99297e-05	0	0	0	0	7.99297e-05	0	0	0	0	0	0.000159859	0.000319719	0.000639437	0	0	0	0.000319719	0	0	0	0	0	0.000159859	0	7.99297e-05
OTU_135	135	Actinobacteria	unidentified_Actinobacteria	Corynebacteriales	Corynebacteriaceae	Corynebacterium_1	Corynebacterium_jeikeium	0	0	0	0	0	0	0	0	0.00143873	0	0	0	0	0	0	0	0.00999121	0	0	0	0	0	0	0	0	0	0	0	0	7.99297e-05	0	0	0	0.000239789	0	0	0	0	0	0	7.99297e-05	0
OTU_304	304	Firmicutes	Bacilli	Bacillales	Paenibacillaceae	Aneurinibacillus		0	0	0	0	0	0	0.00223803	0	0	0	7.99297e-05	7.99297e-05	0.000479578	0	0.00383662	0.00199824	0	0.00223803	0.000239789	0	0.000399648	7.99297e-05	0	0	7.99297e-05	0	0	0	7.99297e-05	0	0	0	0	0	0	0	0	0	0	0	0	0
OTU_4088	4088	Proteobacteria	Gammaproteobacteria	Enterobacteriales	Enterobacteriaceae	Rahnella		0	0	0	0	0	0	0	0	0	0	0.000159859	0	0	0	0	0	0	0.000479578	0	0.000239789	0.000959156	0.000159859	0.00351691	0.00311726	0.000399648	0.00143873	0.000799297	0	0	0	0	0.000159859	7.99297e-05	0	0	0	7.99297e-05	0	0	7.99297e-05	0	0
OTU_205	205	Gemmatimonadetes	unidentified_Gemmatimonadetes	AT425-EubC11_terrestrial_group				0	0	0	0	0	0	0	0	0	0	0	0	0	0	0	0	0	7.99297e-05	0	0	0	0	0	0	0	7.99297e-05	0	0	0	0	0	0	0	0	0	0	0	0.000159859	0.000399648	0.000559508	0.000159859	0.000799297
OTU_1154	1154	Actinobacteria	unidentified_Actinobacteria	Corynebacteriales	Corynebacteriaceae	Corynebacterium_1		0.00839261	0	0	0	0	0	0	0	0	0	0.00119894	0.000319719	7.99297e-05	0.00119894	0	0	0	0	0	0	0	0	0	0	0	0	0	0	0	0	0	0	0	0.000479578	0	0	0	0	0	0	0	0
OTU_329	329	Proteobacteria	Betaproteobacteria					0	0	0	0	0	0	0	0	0	0	0	0	0	0	7.99297e-05	0	0	0	0	0	0	0	0	0	0	0	0	0	0	0	0	0	0	0	0	0	7.99297e-05	0	0.00191831	0.00143873	0.0013588	0.00175845
OTU_1288	1288	Proteobacteria	Betaproteobacteria	Burkholderiales	Oxalobacteraceae	Massilia		0	0	0	7.99297e-05	0	0	0	0.000159859	7.99297e-05	0	7.99297e-05	0	0	0	0	0	0	0	7.99297e-05	0.000319719	0.000319719	0.0021581	0	0.000319719	0.000559508	0.000159859	0.000479578	0.000799297	0.000399648	0.000559508	7.99297e-05	0.000239789	0.000799297	0.000159859	0.00103909	0.00119894	0.000719367	7.99297e-05	0	0	0	0.000159859
OTU_521	521	Acidobacteria	unidentified_Acidobacteria	Subgroup_5				0	0	0	0	0	0	0	0	0	0	0	0	7.99297e-05	0	0	0	0	0	0	0	0	0	0	0	0	7.99297e-05	0	0	0	0	0	0	0	0	0	0	0	0	0.000959156	0.00103909	0.00151866	0.000159859
OTU_224	224	Actinobacteria	unidentified_Actinobacteria	Corynebacteriales	Nocardiaceae	Rhodococcus		0	0	0	0	0	0	0	0	0.00351691	0.00175845	0	0.000159859	0	0	0	0	0	0	0	7.99297e-05	0.00143873	0	0	0	0	0	0.00151866	0	0	0	0	7.99297e-05	0	0	0	0	0	0	0.000399648	0.000319719	0	7.99297e-05
OTU_321	321	Actinobacteria	Acidimicrobiia	Acidimicrobiales				0	0	0	0	0.00695388	0	0	0	0	0	0	0	0	0	0	0.000239789	0.00103909	0	0	7.99297e-05	0	0	0	0	0	0	0	0	0	0	0	0	0	0	0	0	0	0	0.000159859	0.000239789	7.99297e-05	0.000159859
OTU_225	225	Firmicutes	Clostridia	Clostridiales	Lachnospiraceae	Lachnospiraceae_NK3A20_group		0	0.0111902	0	7.99297e-05	0	0	0	0	0	0	0	0	0	0	0	0	0	0	0	0	0	0	0	0	0	0	0	0	0	0	0	0	0	0	0	0	0	0	0	0	0	0
OTU_331	331	Proteobacteria	Gammaproteobacteria	Enterobacteriales	Enterobacteriaceae	Ewingella		0	7.99297e-05	0	0	0.00399648	7.99297e-05	7.99297e-05	0.00567501	0	0.00111902	0	0	0	0	0	0	0	0	0	0	0	0	0	0	0	0	0	0	0	0	0	0	0	0	0	0	0	0	0	0	0	0
OTU_2732	2732	Proteobacteria	Alphaproteobacteria	Rhizobiales	JG34-KF-361			0	0	0	0	0	0	0	0	0	0	0	0	0	0	0	0	0	0	0	0	0	0	0	0	0	0	0	7.99297e-05	0	0	0	0	0	0	0	0	0	0	0.000639437	0.00103909	0.000479578	0.000479578
OTU_218	218	Proteobacteria	Alphaproteobacteria	Rhodospirillales	Acetobacteraceae	Acidisoma		0.00199824	0	0	0	0	0.000159859	0	0.00175845	0	0	0	0	0	0	0	0	0.00679402	0	0	0	0	0	0	0	0	0	0	7.99297e-05	0	0	0	0	0	0	0	0	0	0	0	0	0	0
OTU_244	244	Gemmatimonadetes	unidentified_Gemmatimonadetes	Gemmatimonadales	Gemmatimonadaceae	Gemmatimonas		0	0	0	0	0	0	0	0	0	0	0	0	0	0.000159859	0	7.99297e-05	0	0	0	0	0.000239789	0	0	0	0	0	0	0	0	0	0	0	0	0	0	0	0	7.99297e-05	0.00119894	0.00191831	0.000799297	0.00151866
OTU_328	328	Firmicutes	Bacilli	Lactobacillales	Carnobacteriaceae	Atopostipes		0	0	0	0	0	0	0	0	0	0	0	7.99297e-05	0	0	0	0	0	0.0105507	0	0	0	0	0	0	0	0	0	0	0	0	0	0	0	0	0	0	0	0	0	0	0	0
OTU_217	217	Bacteroidetes	Sphingobacteriia	Sphingobacteriales	Sphingobacteriaceae	Pedobacter		0	0	0	0	0	0	0	0	0	0	0	0.000319719	0.000159859	0	7.99297e-05	0	0	0	7.99297e-05	0	0	0	0	0	0.0029574	0.000399648	7.99297e-05	0.000479578	0.000159859	0	0	0.000399648	0.000479578	0.000159859	0.000239789	7.99297e-05	0.000639437	0.00351691	0	0	0	0
OTU_423	423	Acidobacteria	unidentified_Acidobacteria	Acidobacteriales	Acidobacteriaceae_.Subgroup_1.	Candidatus_Koribacter		0	0	0	0	0.00999121	0	0	0	0	0	0	0	0	0	0	0	0	0	0	0	0	0	0	0	0	0	0	0	0	0	0	0	0	0	0	0	0	0	0	0	0	0
OTU_427	427	Firmicutes	Bacilli	Bacillales	Family_XI	Gemella		0	0	0	0	0	0	0	0	0	0.00799297	0	0	0	0	0	0	0	0	0	0	0	0	0	0	0	0.00127887	0.000559508	0	0	0.000719367	7.99297e-05	7.99297e-05	7.99297e-05	0	0	0	0	0	0	0	0	0
OTU_281	281	Actinobacteria	Thermoleophilia	Gaiellales				0	0	0.00591479	0	0	0	0	0	0	0	0	0	0	0	0	0	0	0	0	0	0	0	0	0	0	0	0	0	0	0	0	0	0	0	0	0	0	7.99297e-05	0	0	7.99297e-05	0
OTU_2444	2444	Actinobacteria	unidentified_Actinobacteria	Frankiales	Geodermatophilaceae			0	0	0	0	0	0	0	0	0	0	0	0	0.0051155	0	7.99297e-05	0	0.000159859	0	0	0	0	0	0	0	7.99297e-05	0.000159859	0	0	0	0	0	0	0	0	0	0	0	0	0.000319719	0.000319719	0.000239789	7.99297e-05
OTU_1096	1096	Actinobacteria	unidentified_Actinobacteria	Micrococcales	Micrococcaceae	Kocuria		0	0	0	0	0.00887219	0	0	0	0.0013588	0	0.000319719	7.99297e-05	0	0	0	0	0	0	0	0	0	0	0	0	0	0	0	0	0	0	0	0	0	0	0	0	0	0	0	0	0	0
OTU_451	451	Proteobacteria	Alphaproteobacteria	Rhizobiales	Hyphomicrobiaceae	Rhodoplanes		0	0	0	0	0	0	0	0	0	0	0	0	0	0	0	0	0	7.99297e-05	0	0	0	0	0	0	0	0	0	0	0	0	0	0	0	0	0	0	0	0	0.000559508	0.00111902	0.000719367	0.000879226
OTU_408	408	Proteobacteria	Alphaproteobacteria	Rhodobacterales	Rhodobacteraceae	Stappia		0.00455599	0	0	0	0	0	0	0	0	0	0.000719367	0.000879226	0	0.0013588	0.00111902	0	0.00199824	0	0	0	0	0	0	0	0	0	0	0	0	0	0	0	0	0	0	0	0	0	0	0	0	0
OTU_4540	4540	Proteobacteria						0.000319719	0.000319719	0	0	0.000159859	7.99297e-05	0.000159859	0	0.000319719	0.000399648	0.00199824	0.000879226	0.000159859	7.99297e-05	7.99297e-05	0.00303733	0.000159859	0.000799297	0.000719367	0	0.000159859	0.000239789	0	0	0	0	0	7.99297e-05	0	0.000159859	0	7.99297e-05	7.99297e-05	0	0	0	0	0	0	0	0	7.99297e-05
OTU_297	297	Firmicutes	Clostridia	Clostridiales	Family_XI			0	0.00719367	0	0	0	0	0	0	0	0	0	0	0.00311726	0	0	0	0	0	0	0	0	7.99297e-05	0	0	0	0	0	0	0	0	0	0	0	0	0	0	0	0	0	0	0	0
OTU_510	510	Proteobacteria	Deltaproteobacteria	Desulfobacterales	Nitrospinaceae	Candidatus_Entotheonella		0	0	0	0	0	0	0	0	0	0	0	0	0	0	0	7.99297e-05	0	0	0	0	0	0	0	0	0	0	7.99297e-05	0	0	0	0	0	0	0	0	0	0	7.99297e-05	0.00103909	0.00199824	0.000799297	0.00119894
OTU_274	274	Firmicutes	Bacilli	Bacillales	Paenibacillaceae	Paenibacillus	Paenibacillus_hunanensis	0	0	0	0	0	0	0	0	0	0	0	0	7.99297e-05	0	0	0	0	0	0	0.00159859	0.000479578	0.000159859	0.00447606	0.00191831	0.000239789	0.000399648	7.99297e-05	7.99297e-05	0	7.99297e-05	0	0.000479578	0	0	0	0	0	0	0	7.99297e-05	0	0
OTU_309	309	Actinobacteria	Acidimicrobiia	Acidimicrobiales				0	0	0	0	0	0	0	0	0	0	0	0	7.99297e-05	0	0	0	0	0	0	0	0	0	0	0	0	7.99297e-05	0	0	0	0	0	0	0	0	0	0	0	7.99297e-05	0.000799297	0.000799297	0.000239789	0.000639437
OTU_783	783	Actinobacteria	Thermoleophilia	Solirubrobacterales	480-2			0	0	0	0	0	0	0	0	0	0	0	0	0	0	0	0.000159859	0	0	0	0	0	0	0	0	0	0	7.99297e-05	0	0	0	0	0	7.99297e-05	0	0	0	0	0	0.000879226	0.00103909	0.000639437	0.000479578
OTU_232	232	Proteobacteria	Deltaproteobacteria	Myxococcales	Phaselicystidaceae	Phaselicystis		0	0	0	0	0	0	0	0	0	0	0	0	7.99297e-05	0	7.99297e-05	0	0	0	0	0	0	0	0	0	0	0	0	0	0	0	0	0	0	0	0	0	0	0	0.000559508	0.000559508	0.00439613	7.99297e-05
OTU_503	503	Acidobacteria	unidentified_Acidobacteria	Subgroup_3	unidentified_Acidobacteria	Candidatus_Solibacter		0	0	0	0	0	0	0	0	0	0	0	0	7.99297e-05	0	7.99297e-05	0	0	0.000319719	0	0	0	0	0	0	0	0	0	7.99297e-05	0	0	0	0	0	7.99297e-05	0	0	0	0	0.000879226	0.000719367	0.000799297	0.000159859
OTU_494	494	Proteobacteria	Alphaproteobacteria	Rhizobiales	alphaI_cluster			0	0	0	0	0.00951163	0	0	0	0	7.99297e-05	0	0	0	0	0	0	0	0	0	0	0	0	0	0	0	0	0	0	0	0	0	0	0	0	0	0	0	0	0	0	0	0
OTU_4849	4849	Actinobacteria	unidentified_Actinobacteria	Micrococcales	Intrasporangiaceae	Phycicoccus		0	0	0	0	0	0	0	0	0.00247782	0	0	0	0	0	0	0	7.99297e-05	0	0	0	0	0	0	0	7.99297e-05	0	0	0	0	0	0	0	0	0	0	0	0	0.000159859	0.000639437	0.000479578	0.000239789	0.000319719
OTU_207	207	Proteobacteria	Betaproteobacteria	Hydrogenophilales	Hydrogenophilaceae	Hydrogenophilus		0	0	0	0	0	0	0	7.99297e-05	0.000479578	0	0	0.0021581	0.000799297	0	0.00143873	0.00127887	0.00311726	7.99297e-05	0	0	0	0	0	0	0	0	0	0	0	7.99297e-05	0	0	0	0	0	0	0	0	0	0	0	0
OTU_1355	1355	Actinobacteria	Thermoleophilia	Gaiellales				0	0	0	0	0	0	0	0	0	0	0	0	0	0	0	0	0	0.000159859	0	0	0	0	0	0	0	0	0	0	0	0	0	0	0	7.99297e-05	0	0	7.99297e-05	7.99297e-05	0.00111902	0.000639437	0.000639437	0.000799297
OTU_184	184	Firmicutes	Bacilli	Lactobacillales	Streptococcaceae	Lactococcus	Lactococcus_lactis	0	0	0	0	0	0	0	0	0	0	0	0	7.99297e-05	0	7.99297e-05	0	0	0	0	0	0	0	0.00503557	0.00231796	0.000399648	0.000719367	0.000239789	0.000159859	0	0	0	0.000319719	0	0	0	0	7.99297e-05	0	0	0	0	0
OTU_1076	1076	Bacteroidetes	Sphingobacteriia	Sphingobacteriales	Saprospiraceae			0	0	0	0	0	0	0	0	0	0	0	0	7.99297e-05	0	7.99297e-05	0	0	0	0	7.99297e-05	0	0	0	0	0	0	0	0.000159859	0	7.99297e-05	0	0	0	0	0	0	0	7.99297e-05	0.000319719	0.000159859	0.00127887	0.000479578
OTU_263	263	Proteobacteria	Alphaproteobacteria	Rhizobiales	Hyphomicrobiaceae	Devosia		0	0	0	0	0	0	0	7.99297e-05	0.00231796	0	0	0	0	0	0.000159859	7.99297e-05	0	0	0	0	0	0.000159859	0	0	0.00143873	0.000959156	0	0	0.00111902	0	0	0	0.000159859	7.99297e-05	0	0	0	7.99297e-05	0.000159859	0.000239789	0	0.000239789
OTU_391	391	Proteobacteria	Betaproteobacteria	Nitrosomonadales	Nitrosomonadaceae			0	0	0	0	0	0	0	0	0	0	0	0	7.99297e-05	0	0	0	0	0	0	0	0	0	0	0	0	0	0	0	0	7.99297e-05	0	0	0	0	0	0	0	0	0.00111902	0.00119894	0.00111902	0.00159859
OTU_3406	3406	Actinobacteria	unidentified_Actinobacteria	Corynebacteriales	Nocardiaceae	Rhodococcus		0	0	0	0	0	0	0	0	0	0	0	0.000879226	7.99297e-05	0.000239789	7.99297e-05	0.000159859	0	0.0043162	0.000239789	0.000559508	0	0	0	0	0	0	0	7.99297e-05	0	0	0	0.000159859	0	0	0	0	0	0	0	0.000239789	7.99297e-05	7.99297e-05
OTU_360	360	Proteobacteria	Betaproteobacteria	TRA3-20				0	0	0	0	0	0	0	0	0	0	0	0	0	0	0	0	0	0	0	0	0	0	0	0	0	0	0	0	0	0	0	0	0	7.99297e-05	0	0	0	0	0.00111902	0.000319719	0.000239789	0.000159859
OTU_153	153	Firmicutes	Clostridia	Clostridiales	Ruminococcaceae			0	0	0	0	0	0	0	0	0	0	0	0.000159859	0	0	0	0	0	0	0	0	0	0	0	0	7.99297e-05	0	0	0	0	0	0	0	0	0	0	0	0	0.00879226	0	0	0	0
OTU_4255	4255	Actinobacteria	unidentified_Actinobacteria	Micrococcales	Microbacteriaceae			0	0	0	0	0	0	0	0	0	0	0	7.99297e-05	0	0	0	0	0	0	0.000319719	0.000319719	0	0	7.99297e-05	0	0.000559508	7.99297e-05	7.99297e-05	0.000639437	0	0	0	0.000959156	0	0.00103909	0	0	0	0.000239789	0.000239789	0	0.000559508	0.000399648
OTU_468	468	Proteobacteria	Betaproteobacteria	SC-I-84				0	0	0	0	0	0	0	0	0	0	0	0	0	7.99297e-05	0	0	0	0	0	0	0	0	0	0	0	0	0	0	0	0	7.99297e-05	0	0	0	0	0	0	0	0.000799297	0.000799297	0.000479578	0.0013588
OTU_254	254	Chloroflexi	TK10					0	0	0	0	0.0086324	0	0	0	0	0	0	0	0	0	0	0	0	0	0	0	0	0	0	0	0	0	0	0	0	0	0	0	0	0	0	0	0	0	0	0	0	0
OTU_4040	4040	Actinobacteria	unidentified_Actinobacteria	Propionibacteriales	Nocardioidaceae	Marmoricola		0	0	0	0	0	0	0	0	0	0	0	0	0	0	0	0	0.00239789	0	0	0	7.99297e-05	0	0	0	0	0	0	0	0	0	0	0	0	0	0	0	7.99297e-05	0	0.000639437	0.000559508	0.000319719	0.000159859
OTU_270	270	Acidobacteria	unidentified_Acidobacteria	Subgroup_3	unidentified_Acidobacteria	Candidatus_Solibacter		0	0	0	0	0.00831268	0	0	0	0	0	0	0	0	0	0	0	0	0	0	0	0	0	0	0	0	0	0	0	0	0	0	0	0	0	0	0	0	0	0	0	0	0
OTU_258	258	Acidobacteria	unidentified_Acidobacteria	Subgroup_2				0	0	7.99297e-05	0	0.00839261	0	0	0	0	0	0	0	0	0	0	0	0	0	0	0	0	0	0	0	0	0	0	0	0	0	0	0	0	0	0	0	0	0	0	0	0	0
OTU_1633	1633	Firmicutes	Bacilli	Bacillales	Staphylococcaceae	Staphylococcus	Staphylococcus_equorum	0	0.000159859	0	0.0043162	0	0	7.99297e-05	0	0	0	0	0	0.00159859	0.00127887	0	0	7.99297e-05	0	0.000639437	0	7.99297e-05	0	0	0	0	0	0	0	0	0	7.99297e-05	0	0	0	0	0	0	0	0	0	0	0
OTU_373	373	Actinobacteria	unidentified_Actinobacteria	Propionibacteriales	Propionibacteriaceae	Propionibacterium	Propionibacterium_granulosum	0	0	0	0.00111902	0	0.000879226	7.99297e-05	0.000159859	0.000799297	0.00407641	0	0	0.000879226	0	0	0	0	0	0.000239789	0	0	0	7.99297e-05	0	0	0	0	0	0	0	0	0	0	0	0	0	0	0	0	0	0	0
OTU_176	176	Bacteroidetes	Bacteroidia	Bacteroidales	Prevotellaceae	Alloprevotella		0	0	0	0	0	0	0	0	0	0	0	0	0	0	7.99297e-05	0	0.00799297	0	7.99297e-05	0	0	0	0	0	0	0	0	0	0	0	0	0	0	0	0	0	0	0	0	0	0	0
OTU_261	261	Actinobacteria	unidentified_Actinobacteria	Micrococcales	Micrococcaceae	Micrococcus	Micrococcus_lylae	0	0	0	0	0	0	0	0	0	0.00255775	0	7.99297e-05	7.99297e-05	0	7.99297e-05	0	0.0051155	0	0	0	0	0	0	0	0	0	0	0.000239789	0	0	0	0	0	0	0	0	0	0	0	0	0	0
OTU_422	422	Bacteroidetes	Bacteroidia	Bacteroidales	Prevotellaceae	Prevotella_1		0.00319719	0.00487571	0	0	0	0	0	0	0	0	0	0	0	0	0	0	0	0	0	0	0	0	0	0	0	0	0	0	0	0	0	0	0	0	0	0	0	0	0	0	0	0
OTU_223	223	Actinobacteria	Acidimicrobiia	Acidimicrobiales	Acidimicrobiaceae	CL500-29_marine_group		0	0	0	0	0	0	0	0	0	0	0	0	0	0	0	0	0	0.000159859	0	0	0	0	0	0	0	0	0	0	0	0	0	0	0	0	0	0	0	0	7.99297e-05	0.000479578	0.000319719	0.000559508
OTU_1622	1622	Acidobacteria	Holophagae	Subgroup_10	ABS-19			0	0	0	0	0	0	0	0	0	0	0	0	0	0	0	0	0	0	0	0	0	0	0	0	0	0	0	0	0	0	0	0	0	0	0	0	0	0	0.000159859	0.000239789	0.000159859	0.0013588
OTU_267	267	Actinobacteria	FFCH16263					0	0	0	0	0	0	0	0	0.00175845	0	0	0	0	0	7.99297e-05	0	0	0	0	0	0	0	0	0	0	0	0	0	0	0	0	0	0	0	0	0	7.99297e-05	0	0.000719367	0.000639437	0.000879226	0.000879226
OTU_3785	3785	Actinobacteria	Thermoleophilia	Solirubrobacterales	480-2			0	0	0	0	0	0	0	0	0	0	0	0	7.99297e-05	0	0	0	0	0	0	0	0	0	0	0	0	7.99297e-05	0.000639437	0	0	0	0	0	0	0	0	0	0	0	0.000479578	0.000719367	0.000479578	0.000559508
OTU_859	859	Proteobacteria	Betaproteobacteria	TRA3-20				0	0	0	0	0	0	0	0	0	0	0	0	0	0	0	0	0	0	0	0	0	0	0	0	0	0	0	7.99297e-05	0	0	0	0	0	0	0	0	0	7.99297e-05	0.000639437	0.000479578	0.000879226	0.000879226
OTU_2	2	Proteobacteria	Betaproteobacteria	Burkholderiales	Oxalobacteraceae			0	0	0	0	0	0	0	0	0	0	7.99297e-05	0	7.99297e-05	0	0	0	7.99297e-05	0	0	0.000239789	0.000319719	0.00103909	0	0.000159859	0.000239789	0.000239789	0.000319719	0.000399648	0.000239789	0.000479578	0.000159859	0	0.000479578	7.99297e-05	0.000639437	0.000719367	0.000559508	0	0	7.99297e-05	0	7.99297e-05
OTU_342	342	Firmicutes	Clostridia	Clostridiales	Family_XI	Anaerococcus		0	0.00655423	0	0	0	0	7.99297e-05	0	0	0	0	0	0	0	0	0	0	0	0	0	0	0	0	0	0	0.000319719	0.000559508	0	0	0	0	0	0	0	0	0	0	0	0	0.000159859	0	0
OTU_412	412	Proteobacteria	Deltaproteobacteria	Myxococcales	Haliangiaceae	Haliangium		0	0	0	0.00383662	0	0	0	0	0	0	0	0	0	0	0	0	0	0	0	0	0	0	0	0	0	0	0	0	0	0	0	0	0	0	0	0	0	0	0	7.99297e-05	7.99297e-05	0.000239789
OTU_371	371	Proteobacteria	Alphaproteobacteria	Rhodospirillales	Acetobacteraceae	Rhodovarius		0	0	0	0	0	0	0	0.00279754	0	0	0.00335705	0.000239789	0	0	0.000639437	7.99297e-05	0	0	0	0	0	0	0	0	0	0	0	0	0	0	0	0	0	0	0	0	0	0	7.99297e-05	0.000159859	0	0
OTU_2179	2179	Actinobacteria	Thermoleophilia	Gaiellales				0	0	0.000159859	0	0	0	0	0	0	0	0	0	7.99297e-05	0	0	0	0	0	0	0	0	0	0	0	0	0	0	0	0	0	0	0	0	0	0	0	0	0	0.000159859	0.000319719	0.000639437	0.000399648
OTU_1660	1660	Proteobacteria	Alphaproteobacteria	Rhizobiales	KF-JG30-B3			0	0	0	0	0	0	0	0	0	0	0	0	0	0	0	0	0	0	0	0	0	0	0	0	0	0	0	0	0	0	0	0	0	0	0	0	0	0	0.000799297	0.000479578	0.000159859	0.000719367
OTU_501	501	Proteobacteria	Gammaproteobacteria	Pseudomonadales	Moraxellaceae	Moraxella	Moraxella_osloensis	0.00447606	0.000639437	0	0.000159859	0.000879226	0	7.99297e-05	0	0	7.99297e-05	0	0.000399648	0.000159859	0.000239789	0	0	0	7.99297e-05	0	0	0	0	0	0	0	7.99297e-05	0	0	0	7.99297e-05	0	0	7.99297e-05	0	0	0	0	0	0	0	0	0
OTU_4377	4377	Proteobacteria	Alphaproteobacteria					0	0	0.000159859	0	0	0	0	0	0	0	0	0.000159859	0	0	7.99297e-05	7.99297e-05	0	0	7.99297e-05	0.00119894	0	0.000159859	0	0	0.00207817	0.000479578	0.000319719	0.000399648	0.000639437	0.000159859	0	0.000399648	0.000479578	0.000159859	7.99297e-05	0.000159859	7.99297e-05	0	0	0	0	0
OTU_236	236	Proteobacteria	Gammaproteobacteria	Enterobacteriales	Enterobacteriaceae			0	0	0.00743346	0	0	0	0	0	0	0	0	0	0	0	0	0	0	0	0	0	0	0	0	0	0	0	0	0	0	0	0	0	0	0	0	0	0	0	0	0	0	0
OTU_418	418	Proteobacteria	Deltaproteobacteria	GR-WP33-30				0	0	0	0	0.00455599	0	0	0	0	0	0	0	0	0.00287747	0	0	0	0	0	0	0	0	0	0	0	0	0	0	0	0	0	0	0	0	0	0	0	0	0	0	0	0
OTU_295	295	Chlorobi	Chlorobia	Chlorobiales	SJA-28			0	0	0	0	0	0	0	0	0	0	0	0	7.99297e-05	0	7.99297e-05	0	0	0	0	0	0	0	0	0	0	7.99297e-05	7.99297e-05	7.99297e-05	0	0	0	0	0	0	0	0	7.99297e-05	0	0.00119894	0.000399648	0.000319719	0.00103909
OTU_454	454	Firmicutes	Bacilli	Bacillales	Planococcaceae			0	0	0	0	0	0	0	0	0	0	0	0	7.99297e-05	0	0	0	0	0	0	0	0	0	0	0	7.99297e-05	0.00679402	0	0	0	0	0	0	0	0.000159859	0	0	0	0	0	0	7.99297e-05	0
OTU_344	344	Proteobacteria	Alphaproteobacteria	Rhizobiales				0.00735353	0	0	0	0	0	0	0	0	0	0	0	0	0	0	0	0	0	0	0	0	0	0	0	0	0	0	0	0	0	0	0	0	0	0	0	0	0	0	0	0	0
OTU_2541	2541	Proteobacteria	Alphaproteobacteria	Rhizobiales				0	0	0	0	0	0	0	0	0	0	0	0.000159859	0	0	7.99297e-05	7.99297e-05	0	0	0	0	0	0	0	0	7.99297e-05	7.99297e-05	7.99297e-05	0	0	0	0	0	0	0	0	0	0	0	0.000559508	0.000719367	0.000399648	0.000479578
OTU_388	388	Firmicutes	Clostridia	Clostridiales	Family_XI	Finegoldia		0	0	0	0	0	0	0	0	0.00191831	0	0	0	0	0.00375669	0	0	0	0	0	0	0	0	0	0	0	0	0	0.000159859	0	0	7.99297e-05	0	0.000879226	0	0.000159859	7.99297e-05	0	0	0	7.99297e-05	7.99297e-05	0
OTU_308	308	Firmicutes	Bacilli	Bacillales	Paenibacillaceae	Paenibacillus		0	0.0072736	0	0	0	0	0	0	0	0	0	0	0	0	0	0	0	0	0	0	0	0	0	0	0	0	0	0	0	0	0	0	0	0	0	0	0	0	0	0	0	0
OTU_3163	3163	Actinobacteria	unidentified_Actinobacteria	Micrococcales	Dermabacteraceae	Brachybacterium		0	0.00303733	0	0.000159859	0	0	7.99297e-05	0	0.00111902	0	7.99297e-05	0	7.99297e-05	7.99297e-05	0.000879226	0	0	0	0	0	0	0	0	0	7.99297e-05	0.000159859	0.000719367	7.99297e-05	0	0	0	0	0	0.000559508	0	0	0	0	0	7.99297e-05	0	0
OTU_2969	2969	Firmicutes	Bacilli	Bacillales	Bacillaceae	Bacillus	Bacillus_smithii	0	0	0	7.99297e-05	0	0	0	0	0	0.00599472	0	0	0	0	0	0	0	0	0	0	0	0	0	0	0	0	0	0	7.99297e-05	0	0	0	0	0.000639437	0	0	0	0	0	0	0	0
OTU_286	286	Chloroflexi	Ktedonobacteria	Ktedonobacterales	Thermosporotrichaceae			0	0	0	0	0	0	0	0	0	0	0.00231796	0.000159859	0.00327712	0	0	0.00103909	0	0.000319719	0	0	0	0	0	0	0	7.99297e-05	0	0	0	0	0	0	0	0	0	0	0	0	0	0	0	0
OTU_559	559	Gemmatimonadetes	unidentified_Gemmatimonadetes	Gemmatimonadales	Gemmatimonadaceae	Gemmatimonas		0	0	0	0	0	0	0	0	0	0	0	0	0	0	0	0	0	0	0	0	0	0	0	0	0	0	0	0	0	0	0	0	0	0	0	0	0	0	0.000319719	0.000479578	0.000479578	0.000479578
OTU_561	561	Proteobacteria	Alphaproteobacteria	Rhizobiales	KF-JG30-B3			0	0	0	0	0	0	0	0	0	0	0	0	0	0	0	0	0	0	0	0	0	0	0	0	0	0	0	0	0	0	0	0	0	0	0	0	0	0	0.00143873	0.000639437	0.000959156	0.000799297
OTU_433	433	Actinobacteria	Thermoleophilia	Solirubrobacterales	Solirubrobacteraceae	Solirubrobacter		0	0	0	0	0	0	0	0	0	0	0	0	0	0	0	0	0	0	0	0	0	0	0	0	0	0	0	0	0	0	0	0	0	0	0	0	0	0	0.000799297	0.000799297	7.99297e-05	0.000159859
OTU_485	485	Bacteroidetes	Cytophagia	Cytophagales	Cytophagaceae			0	0	0	0	0	0	0	0	0	0	0	0	0	0	0	0	0	0	0	0	0	0	0	0	0.000159859	0	0	0	0	0.000239789	0	0	0	0	0	0	7.99297e-05	7.99297e-05	0.000479578	0.000559508	0.000879226	0.000319719
OTU_320	320	Proteobacteria	Deltaproteobacteria	GR-WP33-30				0	0	0	0	0	0	0	0	0	0	0	0	7.99297e-05	0	0	0	0	0	0	0	0	0	0	0	0	0	0	0	0	0	0	0	0	0	0	0	0	0	0.000799297	0.000719367	0.000719367	0.000959156
OTU_1297	1297	Acidobacteria	unidentified_Acidobacteria	Subgroup_5				0	0	0	0	0	0	0	0	0	0	0	0	0	0	0	0	0	7.99297e-05	0	0	0	0	0	0	0	7.99297e-05	0	0	0	0	0	0	0	0	0	0	0	0	0.000559508	0.000479578	0.000639437	7.99297e-05
OTU_886	886	Proteobacteria	Betaproteobacteria	B1-7BS				0	0	0	0	0	0	0	0	0	0	0	0	0	0	0	0	0	0	0	0	0	0	0	0	0	0.000159859	0	0	0	0	0	0	0	0	0	0	0	0	0.000559508	0.000719367	0.00167852	0.000959156
OTU_2358	2358	Proteobacteria	Betaproteobacteria	Nitrosomonadales	Nitrosomonadaceae			0	0	0	0	0	0	0	0	0	0	0	0	0	0	0	0	0	0	0	0	0	0	0	0	0	0	7.99297e-05	0	0	0	0	0	7.99297e-05	0	0	0	0	0.000159859	0.000399648	0.000399648	0.000639437	0.000559508
OTU_276	276	Bacteroidetes	Bacteroidia	Bacteroidales	Porphyromonadaceae	Dysgonomonas		0	0	0	0	0	0	0	0	0	0	0	0	0	0	0	0	0	7.99297e-05	0	0	0	0	0	0	0	7.99297e-05	0	0	0	0	7.99297e-05	0	0	0	0	0	0	0	7.99297e-05	0	0	0
OTU_1022	1022	Proteobacteria	Deltaproteobacteria	GR-WP33-30	unidentified_GR-WP33-30	unidentified_GR-WP33-30	delta_proteobacterium_WX152	0	0	0	0	0	0	0	0	0	0	0	0	0	0	0	0	0	7.99297e-05	0	0	0	0	0	0	0	0	0	0	0	0	0	0	0	0	0	0	0	0	0.000399648	0.000479578	0.000559508	0.000559508
OTU_712	712	Actinobacteria	unidentified_Actinobacteria	Micromonosporales	Micromonosporaceae			0	0	0	0	0	0	0	0	7.99297e-05	0.00367676	0	0	0	0	0	0	0	0	0	0	7.99297e-05	0	0	0	0	0	0	0.000159859	0	0	0.000479578	7.99297e-05	0	0	0	0	0	0	0	0.000159859	0.000319719	0.000159859
OTU_580	580	Verrucomicrobia	OPB35_soil_group					0	0	0	0	0	0	0	0	0	0	0	0	7.99297e-05	0	0	0	0	0	0	0	0	0	0	0	0	7.99297e-05	0	0	0	0	0	0	0	0	0	0	0	0.000159859	0.000399648	0.000319719	0.000639437	0.000719367
OTU_1790	1790	Actinobacteria	unidentified_Actinobacteria	Frankiales	Geodermatophilaceae	Geodermatophilus		7.99297e-05	0	0	0.00175845	0	0	0	0	0	0	0	0	0	0	0	0	0	0	0	0	0	0	0	0	0	0	0	0	0	0	0	0	0	0	0	0	0	0	0.000399648	0.000479578	0.000319719	0.000399648
OTU_419	419	Proteobacteria	Alphaproteobacteria	Rhizobiales	unidentified_Rhizobiales	Phreatobacter		0.0051155	0	0	0	0	0	0	0	0	0	0	7.99297e-05	0	0	0.00151866	0	0	0	0	0	0	0	0	0	0	0	0	0	0	0	0	0	0	0	0	0	0	0	0	0	0	0
OTU_364	364	Proteobacteria	Betaproteobacteria	Burkholderiales	Burkholderiaceae	Pandoraea	Pandoraea_sputorum	0	0	0	0	0	0	0	0	0	0	0	0	0	0	0	0	0	0	0	0	0.000399648	0	0.0013588	0.000559508	0.000159859	0	0.000879226	0	7.99297e-05	0	0	0	7.99297e-05	0	7.99297e-05	7.99297e-05	0	0	0	7.99297e-05	7.99297e-05	0
OTU_651	651	Actinobacteria	unidentified_Actinobacteria	Micrococcales	Microbacteriaceae	Amnibacterium		0	0	0	0	0	0	0	0	0	0	0	0	0	0.00159859	0.000159859	0.00311726	7.99297e-05	7.99297e-05	0	0	7.99297e-05	0	0	0	0	0	0	0	0	0	0	0	0	0	0	0	0	0	0.000319719	0.000159859	0	0.000159859
OTU_4454	4454	Proteobacteria	Betaproteobacteria	SC-I-84				0	0	0	0	0	0	0	0	0	0	0	0	0	0	0	0	0	0	0	0	0	0	0	0	0	0	0	0	0	0	0	0	0	0	0	0	0	0	0.000639437	0.000239789	0.000479578	0.000559508
OTU_1116	1116	Proteobacteria	Deltaproteobacteria	Myxococcales				0	0	0	0	0	0	0	0	0	0	0	0	0	0	0	0	0	0	0	0	0	0	0	0	0	0	0	0	0	0	0	0	0	0	0	0	0	0.000159859	0.00103909	0.000559508	0.000239789	0.000239789
OTU_319	319	Acidobacteria	unidentified_Acidobacteria	Subgroup_3	unidentified_Acidobacteria	Bryobacter		0	0	0	0	0.00623451	0	0	0	0	7.99297e-05	0	0	0	0	0	0	0	0	0	0	0	0	0	0	0	0	0	0	0	0	0	0	0	0	0	0	0	0	0	0	0	0
OTU_476	476	Proteobacteria	Alphaproteobacteria	Rhizobiales	Methylobacteriaceae	Methylobacterium	Methylobacteriaceae_bacterium_YIM_100770	0	0	0	0	0	0	0	0	0.00183838	0	0	0	0	0	0	0	0	7.99297e-05	0	0	0.000159859	0	0	0	7.99297e-05	0	0	0.000239789	0	0	0	0	0	0	0	0	0	0	7.99297e-05	0.000159859	7.99297e-05	0
OTU_347	347	Actinobacteria	unidentified_Actinobacteria	Pseudonocardiales	Pseudonocardiaceae	Pseudonocardia	Pseudonocardia_kongjuensis	0	0	0	0	0	0.00119894	0	0	0	0	0	7.99297e-05	0	0	0	0.00439613	0	0	0	0	0	7.99297e-05	0	0	0	0	0	0	7.99297e-05	0	0	0.000159859	0	0	0	0	0	0	0	0	0	0.000159859
OTU_566	566	Actinobacteria	Acidimicrobiia	Acidimicrobiales				0	0	0	0	0	0	0	0	0	0	0	0	0	7.99297e-05	0	0	0	0	0	0	0	0	0	0	0	0	0	0	0	0	0	0	0	0	0	0	0	0	0.000479578	0.000479578	0.000479578	0.000399648
OTU_442	442	Actinobacteria	unidentified_Actinobacteria	Kineosporiales	Kineosporiaceae	Quadrisphaera		0	0	0	0	0	0	0	0	0	0	0.00103909	0	0	0	0	0	0	0	0	0	0	0	0	0	0	0	0	0	0	0	0	0	0	0	0	0	0	0.000159859	0	0.000159859	7.99297e-05	0
OTU_2577	2577	Actinobacteria	unidentified_Actinobacteria	Kineosporiales	Kineosporiaceae			0	0	0	0	0	0	0	0	0	0	0	0	7.99297e-05	0	0.000159859	0	0	0	0	0	0	0	0	0	0	0	0	0.000559508	0.000159859	7.99297e-05	0.000639437	0	0.000159859	0	0	0	0	0	0.000319719	7.99297e-05	7.99297e-05	7.99297e-05
OTU_953	953	Proteobacteria	Betaproteobacteria	Burkholderiales	Burkholderiaceae			0	0	0	0	0	0	0	0	0	0	0	0	0	0	0	0	0	0	0	0	0	0	0.00183838	0.000479578	7.99297e-05	0	7.99297e-05	0.000319719	0	0	0	7.99297e-05	0	0	0	0.000799297	0.000159859	0	0	0	0	0.000559508
OTU_3606	3606	Actinobacteria	unidentified_Actinobacteria	Frankiales	Cryptosporangiaceae	Cryptosporangium	Cryptosporangium_japonicum	0	0	0	0	0	0	0	0	0	0	0	0.000159859	0	0	7.99297e-05	0	0	0	0	0	0.00151866	0	0	0	0	7.99297e-05	0.000559508	0.000479578	0.000319719	0.000159859	7.99297e-05	7.99297e-05	0	0	0	0	0.000159859	0	0.000239789	0.000399648	7.99297e-05	7.99297e-05
OTU_684	684	Acidobacteria	unidentified_Acidobacteria	Subgroup_5				0	0	0	0	0	0	0	0	0	0	0	0	0	0	7.99297e-05	0	0	0	0	0	0	0	0	0	0	0	0	0	0	0	0	0	0	0	0	0	0	0.000239789	0.000159859	0.000159859	0.00151866	0
OTU_1197	1197	Actinobacteria	unidentified_Actinobacteria	Micrococcales	Intrasporangiaceae	Ornithinimicrobium		0	0	0	0	0	0	0	0	0	0	0	0	0.000319719	0.00119894	0	0	0	0	0	0	0	0	0	0	0	0	0	0	0	0	0	0	0	0	0	0	0	0.0043162	0	0	0	0
OTU_526	526	Actinobacteria	unidentified_Actinobacteria	Corynebacteriales	Corynebacteriaceae	Corynebacterium_1	Corynebacterium_pseudodiphtheriticum	0	0	0	0	0	0	0	0	0	0.00591479	0	0	0	0	0	0	0	0	0	0	0	0	0	0	0	0	0	0	0	0	0	0	0	0	0	0	0	0	0	0	0	0
OTU_719	719	Firmicutes	Bacilli	Bacillales	Bacillaceae	Natribacillus		0	0	0	0	0	0	0.00591479	0	0	0	0	0	0	0	0	0	0	0	0	0	0	0	0	0	0	0	0	0	0	0	0	0	0	0	0	0	0	0	0	0	0	0
OTU_531	531	Proteobacteria	Deltaproteobacteria	Sh765B-TzT-29				0	0	0	0	0	0	0	0	0	0	0	0	7.99297e-05	0	0	0	0	0	0	0	0	0	0	0	0	0	0	0	0	0	0	0	0	0	0	0	0	0	0.000639437	0.000399648	0.00111902	0.000559508
OTU_1570	1570	Acidobacteria	Holophagae	Subgroup_7				0	0	0	0	0	0	0	0	0	0	0	0	0	7.99297e-05	0	0	0	0	0	0	0	0	0	0	0	0	0	0	0	0	0	0	0	0	0	0	0	0	0.000879226	0.000239789	0.000319719	0.000639437
OTU_593	593	Actinobacteria	unidentified_Actinobacteria	Propionibacteriales	Nocardioidaceae	Nocardioides		0	0	0	0	0	0	0	0	0	0	0	0	0	0.000159859	0	0	0	0	0	0	0	0	0	0	0	0	0	0	0	0	0	0	0	0	0	0	0	0.000159859	0.000319719	0.000239789	0.000239789	0.000159859
OTU_1009	1009	Acidobacteria	Holophagae	Subgroup_10	Sva0725			0	0	0	0	0	0	0	0	0	0	0	0	0	0	0	0	0	0	0	0	0	0	0	0	0	0	0	0	0	0	0	0	0	0	0	0	0	0.000159859	0.000319719	0.000159859	0.000159859	0.000479578
OTU_381	381	Acidobacteria	unidentified_Acidobacteria	Subgroup_3	unidentified_Acidobacteria	Bryobacter		0	0	0	0	0.00567501	0	0	0	0	0	0	0	0	0	0	0	0	0	0	0	0	0	0	0	0	0	0	0	0	0	0	0	0	0	0	0	0	0	0	0	0	0
OTU_966	966	Actinobacteria	Thermoleophilia	Solirubrobacterales	0319-6M6			0	0	0	0	0	0	0	0	0	0	0	0	0	7.99297e-05	0	0.000159859	0	0	0	0	0	0	0	0	0	0	7.99297e-05	0	0.000159859	7.99297e-05	0	0	0	0	0	0	0	0	0.000639437	0.000479578	0.000399648	0.000399648
OTU_2413	2413	Proteobacteria	Betaproteobacteria	Rhodocyclales	Rhodocyclaceae	Azovibrio		0	0	0	0	0	0	0	0	0	0	0	0	0	0	0	0	0	7.99297e-05	0	0	0	0	0	0	0	0	0	0	0	0	0	0	0	0	0	0	7.99297e-05	0	0	0	0.000159859	0
OTU_2620	2620	Proteobacteria	Alphaproteobacteria	Rhizobiales	unidentified_Rhizobiales	Nordella		0	0	0	0	0	0	0	0	0	0	0	0	0	0	7.99297e-05	0	0	0	0	0	0	0	0	0.000159859	7.99297e-05	0	0	0	0	0	0	0	0	0	0	0	0	0	0.000239789	0.000319719	0.000239789	7.99297e-05
OTU_264	264	Bacteroidetes	Bacteroidia	Bacteroidales	Rikenellaceae	Alistipes		0	0	0	0	0	0	0	0	0	0	0	0	7.99297e-05	0	7.99297e-05	0	0.00487571	0.000159859	0	0.000159859	0	0	0	0	0	0	0	0	0	0	0	0	0	0	0	0	0	0	0	0	0	0
OTU_1851	1851	Proteobacteria	Gammaproteobacteria	Xanthomonadales	unidentified_Xanthomonadales	Steroidobacter		0	0	0	0	0	0	0	0	0	0	0	0	0	0	0	0	0	0	0	0	0	0	0	0	0	0	0	0	0	0	7.99297e-05	0	0	0	0	0	0	0	0.000239789	0.000479578	0.00127887	0.000319719
OTU_522	522	Proteobacteria	Alphaproteobacteria	Caulobacterales	Caulobacteraceae			0	0	0	0	0	0	0	0	0	0	0	0	0	0	7.99297e-05	0	0	0	0	0	0	0	0	0	0	0	0	0	0	0	0	0	0	0	0	0	0	7.99297e-05	0.000159859	0.000319719	0.000319719	0.000239789
OTU_280	280	Actinobacteria	unidentified_Actinobacteria	Pseudonocardiales	Pseudonocardiaceae	Lentzea		0	0	0	0	0	0	0	0	0	0	7.99297e-05	7.99297e-05	0	0	0	0	0	0	0	0	0.00159859	0	0	7.99297e-05	0	0	0	0	7.99297e-05	0	0.000479578	0	0	0	0	7.99297e-05	0.000799297	0	0.000159859	7.99297e-05	0	7.99297e-05
OTU_607	607	Proteobacteria	Alphaproteobacteria	Rhizobiales	Xanthobacteraceae	Pseudolabrys		0	0	0	0	0	0	0	0	0	0	0	0	0	0	0	0	0	0	0	0	0	0	0	0	0	0	0	7.99297e-05	0	0	0	0	0	0	0	0	0	0	7.99297e-05	7.99297e-05	0.000319719	0.000159859
OTU_2520	2520	Actinobacteria	unidentified_Actinobacteria	Frankiales				0	0	0	0	0	0	0	0	0	7.99297e-05	0	0	0	0	0	7.99297e-05	0	0	0	0	0	0	0	0	0	0	0	0	0	0	0	0	0	0	0	0	0	7.99297e-05	0.000639437	0.000399648	0.000159859	0.000159859
OTU_2790	2790	Proteobacteria	Alphaproteobacteria	Rhizobiales	unidentified_Rhizobiales	Nordella		0	0	0	0	0	0	0	0	0	0	0	0	0	0	0	0	0	0	0	7.99297e-05	0	0	0	0	0	0	0	0	0.000159859	0	0	0	0	0	0	0	0	0	0.000319719	0.000239789	0.000159859	0.000479578
OTU_1668	1668	Proteobacteria	Betaproteobacteria	TRA3-20				0	0	0	0	0	0	0	0	0	0	0	0	0	0	0	0	0	0	0	0	0	0	0	0	0	0	0	0	0	0	0	0	0	0	0	0	0	0	0.000319719	0.000319719	0.000479578	0.000719367
OTU_460	460	Gemmatimonadetes	unidentified_Gemmatimonadetes	Gemmatimonadales	Gemmatimonadaceae			0	0	0	0	0	0	0	0	0	0	0	0	0	0	0	0	0	0	0	0	0	0	0	0	0	0	0	0	0	0	0	0	0	0	0	0	0	0	0.000239789	0.000399648	0.000399648	0.000639437
OTU_810	810	Proteobacteria	Alphaproteobacteria	Rhizobiales	Xanthobacteraceae	Labrys		0	0	0	0	0	0	0	0	0.000319719	0	0	0	0	0	0	0	0	0.000159859	0	0	0	0	0	0	0	7.99297e-05	0	0	0.000239789	0	0	0	0	0	0	0	0	0	0.000479578	0.000319719	7.99297e-05	0.000319719
OTU_1073	1073	Actinobacteria	Thermoleophilia	Solirubrobacterales	YNPFFP1			0	0	0	0	0	0	0	0	0	0	0	0	0	0	0	0	0	0	0	0	0	0	0	0	0	0	0	0	0	0	0	0	0	0	0	0	0	7.99297e-05	0.000639437	0.000239789	7.99297e-05	0.000319719
OTU_402	402	Verrucomicrobia	OPB35_soil_group					0	0	0	0	0	0	0	0	0	0	0	0.00103909	0.00167852	0	0	0	0	0.00223803	0	0	0	0	0	0	0	0	0	0	0	0	0	0	0	0	0	0	0	0	0	0	7.99297e-05	0
OTU_2230	2230	Actinobacteria	Thermoleophilia	Solirubrobacterales				0	0	0	0	0	0	0	0	0	0	0	0	7.99297e-05	0	0	0	7.99297e-05	0	0	0	0.000159859	0	0	0	0	0	0	0	0	0	0	0	0	0	0	0	0	0	0.000319719	0.000719367	0.000239789	0.000319719
OTU_4301	4301	Proteobacteria	Deltaproteobacteria	Myxococcales	Cystobacteraceae	Archangium		0	0	0	0	0	0	0	0	0	0	0	0	0	0	0	0	0	0	0	0	0	0	0	0	0	0	0	0	0	0	0	0	0	0	0	0	0	0	0.000239789	0.000479578	0.000399648	0.000479578
OTU_765	765	Proteobacteria	Alphaproteobacteria	Rhizobiales	unidentified_Rhizobiales	Nordella		0	0	0	0	0	0	0	0	0	0	0	0	7.99297e-05	0.000159859	0	0	0	0	0	0	0	0	0	0	0	0	0	0	0	0	0	0	0	0	0	0	0	0	0.000159859	0.000319719	0.000159859	0.000319719
OTU_2712	2712	Proteobacteria	Alphaproteobacteria	Rhizobiales	Methylobacteriaceae			0	0	0	0	0	0	0	0	0	0	0	0	0	0	0	0	0	0	0	0	0	0	0	0	0	0.000159859	0	0	0	0	0	0	0	0	0	0	0	0	0.000159859	0.000399648	0.000479578	0.000399648
OTU_253	253	Proteobacteria	Alphaproteobacteria	Rhizobiales	Methylocystaceae	Pleomorphomonas	Pleomorphomonas_diazotrophica	0	0	0	0	0	0	0	0	0	0	0	0	0	0	0	0	0	0	0	0	0	0	0	0	0	0	0	0	0	0	0	0	0	0	0	0	0	0.0051155	0	0	0	0
OTU_429	429	Proteobacteria	Alphaproteobacteria	Rhodospirillales	Acetobacteraceae			0	0	0	0	0.00519543	0	0	0	0	0	0	0	0	0	0	0	0	0	0	0	0	0	0	0	0	0	0	0	0	0	0	0	0	0	0	0	0	0	0	0	0	0
OTU_489	489	Acidobacteria	unidentified_Acidobacteria	Acidobacteriales	Acidobacteriaceae_.Subgroup_1.	Terriglobus		0.0051155	0	0	0	0	0	0	0	0	0	0	0	0	0	0	0	0	0	0	0	0	0	0	0	0	0	0	0	0	0	0	0	0	0	0	0	0	0	0	0	0	0
OTU_2494	2494	Actinobacteria	Thermoleophilia	Solirubrobacterales				0	0	0	0	0	0	0	0	0	0	0	0	0	0	7.99297e-05	0	0	0	0	0	0	0	0	0	0	0	0	0	0	0	0	0	0	0	0	0	0	0	0.000639437	0.000319719	0.000239789	0.000559508
OTU_399	399	Chlorobi	Chlorobia	Chlorobiales	OPB56			0	0	0	0	0	0	0	0	0	0	0	0	0	0	0	0	0	0	0	0	0	0	0	0	0	0	0	0	0	0	0	0	0	0	0	0	0	0	0.000559508	0.000399648	0.000239789	0.000239789
OTU_2371	2371	Proteobacteria						0	0	0	0	0	0	0	0	0	0	0	0	0	0	7.99297e-05	0.000159859	0	0	0	0.000239789	0	0.000159859	0	0.000159859	7.99297e-05	0.000239789	0.000159859	0.000479578	0.000479578	7.99297e-05	0.000159859	0.000639437	0.000799297	0.000959156	7.99297e-05	0	7.99297e-05	7.99297e-05	0	0	0	0
OTU_4404	4404	Actinobacteria	Acidimicrobiia	Acidimicrobiales	Acidimicrobiaceae			0	0	0	0	0	0	0	0	0	0	0	0	0	0	0	0	0	0	0	0	0	0	0	0	0	0	0	0	0	0	0	0	0	0	0	0	0	0	0.000399648	0.000319719	0.000479578	0.000239789
OTU_493	493	Proteobacteria	Gammaproteobacteria	Xanthomonadales	unidentified_Xanthomonadales	Acidibacter		0	0	0	0.000239789	0.00175845	0	0	0	0	0.00271761	0	0	0	0	0	0	0	0	0	0	0	0	0	0	0	0	0	0	0	0	0	0	0	0	0	0	0	0	0	0	0	7.99297e-05
OTU_332	332	Firmicutes	Bacilli	Lactobacillales	Lactobacillaceae	Lactobacillus	Lactobacillus_iners	0	0	0	0.00247782	0	0	7.99297e-05	0	0.00103909	0	0	7.99297e-05	0.00111902	0	0	0	0	7.99297e-05	0	0	0	0	0	0	0	0	0	0	0	0.000159859	0	0	0	0	0	0	0	0	0	0	0	0
OTU_326	326	Acidobacteria	unidentified_Acidobacteria	Acidobacteriales	Acidobacteriaceae_.Subgroup_1.			0	0	0	0	0	0	0	0	0	0	0	0.000879226	0	0	0	0	0	0	0	7.99297e-05	0	0	0	0	0	0	0	0	0	0	0	0	0	0	0	0	0.000159859	0	7.99297e-05	0	0	0
OTU_283	283	Proteobacteria	Alphaproteobacteria	Rickettsiales	Anaplasmataceae	Wolbachia		0	0	0	0	0	0	0	0	0	0	0	7.99297e-05	7.99297e-05	7.99297e-05	0	0	0.00463592	0	7.99297e-05	0	0	0	0	0	0	0	0	0	0	0	0	0	0	0	0	0	0	0	0	0	0	0
OTU_690	690	Proteobacteria	Alphaproteobacteria	Rhizobiales	unidentified_Rhizobiales	Nordella		0	0	0	0	0	0	0	0	0	0	0	0	0	0	0	0	0	0	0	0	0	0	0	0	0	0	0	0	0	0	0	0	0	0	0	0	0	0	0.000479578	0.000399648	0.000479578	0.000319719
OTU_2318	2318	Firmicutes	Bacilli	Bacillales	Planococcaceae	Lysinibacillus	Lysinibacillus_varians	0	0	0	0	0	0	0	0	0.00183838	0	0	0.000399648	0	0	0.00151866	0	0	0.000159859	0.000559508	0	0	0	0	0	0	0	0	0	0	0	0	0	0	0	0	0	0	0	7.99297e-05	0	0	0
OTU_3176	3176	Chlorobi	Chlorobia	Chlorobiales	SJA-28			0	0	0	0	0	0	0	0	0	0	0	0	0	0	0	0	0	0	0	0	0	0	0	0	0	0	0	0	0	0	0	0	0	0	0	0	7.99297e-05	0	0.000319719	0.000399648	0.000479578	0.000639437
OTU_481	481	Bacteroidetes	Sphingobacteriia	Sphingobacteriales	NS11-12_marine_group			0	0	0	0	0	0	0	0	0	0	0	0	0	0	0	0	0.000159859	7.99297e-05	0	0	0	0	0	0.000159859	0	0	0	0	0	0	0	0	0	0	0	0	7.99297e-05	0	0.000479578	0.000319719	0.000239789	0.000239789
OTU_1039	1039	Elusimicrobia	unidentified_Elusimicrobia	Lineage_IIa				0	0	0	0	0	0	0	0	0	0	0	0	0	0	0	0	0	7.99297e-05	0	0	0	0	0	0	0	0	7.99297e-05	0	0	0	0	0	0	0	0	0	0	0.000159859	0.000639437	0.000159859	0.000319719	0.000239789
OTU_306	306	Firmicutes	Clostridia	Clostridiales				0	0	0	0	0	0	0	0	0	0	0	0	7.99297e-05	0	0	0	0.00455599	0	0	0	0	0	0	0	0	0	0	0	0	0	0	0	0	0	0	0	0	0	0	0	0	0
OTU_2313	2313	Acidobacteria	Holophagae	Subgroup_7				0	0	0	0	0	0	0	0	0	0	0	0	0	0	0	0	0	0	0	0	0	0	0	0	0	0	0	0	0	0	0	0	0	0	0	0	0	0	0.000319719	0.000159859	0.000159859	0.000479578
OTU_694	694	Actinobacteria	Acidimicrobiia	Acidimicrobiales				0	0	0	0	0	0	0	0	0	0	0	0	0	7.99297e-05	0	0	0	0	0	0	0	0	0	0	0	0	0	0	0	0	0	0	0	0	0	0	0	0	0.000239789	0.000159859	0.000479578	0.000239789
OTU_3329	3329	Proteobacteria	Alphaproteobacteria					7.99297e-05	0.000399648	0.000239789	0	7.99297e-05	7.99297e-05	0.000399648	0.000239789	0.000959156	7.99297e-05	0	0.000159859	0.000479578	0	7.99297e-05	0.000799297	0.000159859	0.000319719	0	7.99297e-05	0	0	0	0	0.000159859	0	0	0	0	0	0	0	0	0	0	0	0	0	0	0	0	0
OTU_303	303	Firmicutes	Clostridia	Clostridiales	Lachnospiraceae			0	0	0	0	0	0	0	0	0	0	0	7.99297e-05	0	0	7.99297e-05	7.99297e-05	0.00455599	0	0	0	0	0	0	0	0	0	0	0	0	0	0	0	0	0	0	0	0	0	0	0	0	0
OTU_2165	2165	Proteobacteria	Betaproteobacteria					0	0	0	0	0	0	0	0	0	0	0	0	0	0	0	0	0	0	0	0	0	0	0	0	0	0	0	0	0	0	0	0	0	0	0	0	0	0	0.000159859	0.000239789	7.99297e-05	0.000159859
OTU_459	459	Verrucomicrobia	OPB35_soil_group					0	0	0	0	0	0	0	0.0013588	0	0	0	0.000799297	0.000799297	0.000239789	0.00159859	0	0	0	0	0	0	0	0	0	0	0	0	0	0	0	0	0	0	0	0	0	0	0	0	0	0	0
OTU_848	848	Proteobacteria	Betaproteobacteria	SC-I-84				0	0	0	0	0	0	0	0	0	0	0	0	0	0	0	0	0	0	0	0	0	0	0	0	0	0	0	0	7.99297e-05	0	0	0	0	0	0	0	0	0	7.99297e-05	0.000159859	7.99297e-05	7.99297e-05
OTU_681	681	Proteobacteria	Alphaproteobacteria	Rhizobiales	Methylobacteriaceae	Methylobacterium	Methylobacterium_cerastii	0	0	0	0	0	0	0	0	0.00391655	0	0	0	0	0	0	0	0	0	0	0	0	0	0	0	0	0	0	0	0	0	0	0	0	0	0	7.99297e-05	0	0	0	0	0	0
OTU_777	777	Gemmatimonadetes	unidentified_Gemmatimonadetes	Gemmatimonadales	Gemmatimonadaceae			0	0	0	0	0	0	0	0	0	0	0	0	0	0	0	0	0	0	0	0	0	0	0	0	0	0	0	0	0	0	0	0	0	0	0	0	0	0	0.000159859	0	0.000559508	0.000319719
OTU_900	900	Actinobacteria	Acidimicrobiia	Acidimicrobiales				0	0	0	0	0	0	0	0	0	0	0	0	0	0	0	0	0	0	0	0	0	0	0	0	0	0	0	0	0	0	0	0	0	0	0	0	0	0	0.000479578	0.000399648	0.000399648	0.000239789
OTU_273	273	Proteobacteria	Gammaproteobacteria					0	0	0	0	0	0	0	0	0	0	0	7.99297e-05	0	0	0	0	0.00383662	0.000159859	0	0	0	0	0	0	0	0	0	0	7.99297e-05	0	0	0	0	0.000479578	0	0	0	0	0	0	0	0
OTU_541	541	Proteobacteria	Betaproteobacteria	Neisseriales	Neisseriaceae	Deefgea		0	0	0	0	0	0	0	0	0	0	0	0	0	0	0	0	0	7.99297e-05	0	0	0	0	0	0	0	0	0	0	0	0	0.000239789	0	0	0	0	0	0	0	0	0	0	0
OTU_734	734	Actinobacteria	unidentified_Actinobacteria	Pseudonocardiales	Pseudonocardiaceae	Amycolatopsis		0	0	0	0	0	0	0.000959156	0	0	0	0	0.000239789	0	0	7.99297e-05	0	0	0	0	0	0.000879226	0	0	0	7.99297e-05	0.000319719	0	0	0	0	0	0	0.000399648	0	0	0	0.000239789	0	7.99297e-05	0	0	0
OTU_296	296	Firmicutes	Bacilli	Lactobacillales	Leuconostocaceae	Weissella		0	0	0	0	0	0	0	0	0	0	0	7.99297e-05	0	0	0	0	0.00423627	0	0	0	0	0	0	0	0	0	0	0	0	0	0	0	0	0	0	0	0	0	0	0	0	0
OTU_1227	1227	Actinobacteria	unidentified_Actinobacteria	Propionibacteriales	Nocardioidaceae	Aeromicrobium		0	0	0	0	0	0	0	0.000239789	0	0	0	0	0.000159859	0	0	0	0	0	0	0	0	0	0	7.99297e-05	0	0	0	0	0	0	0	0	0	0	0	0	0	0	0.000399648	0.000319719	0.000159859	0.000239789
OTU_752	752	Firmicutes	OPB54					0.00447606	0	0	0	0	7.99297e-05	0	0	0	0	0	0	0	0	0	0	0	0	0	0	0	0	0	0	0	0	0	0	0	0	0	0	0	0	0	0	0	0	0	0	0	0
OTU_971	971	Gemmatimonadetes	unidentified_Gemmatimonadetes	Gemmatimonadales	Gemmatimonadaceae			0	0	0	0	0	0	0	0	0	0	0	0	0	0	0	0	0	0	0	0	0	0	0	0	0	0	0	0	0	0	0	0	0	0	0	0	0	0	0.000479578	0.000319719	7.99297e-05	0.000479578
OTU_822	822	Proteobacteria	Deltaproteobacteria	Myxococcales	BIrii41			0	0	0	0	0	0	0	0	0	0	0	0	0	0	0	0	0	0	0	0	0	0	0	0	0	0	7.99297e-05	0	0	0	0	0	0	0	0	0	0	0	0.000159859	0.000319719	0.00191831	0.000159859
OTU_654	654	Armatimonadetes						0	0	0	0	0	0	0	0	0.000159859	0	0	0	0	0	0	0	0	0	0	0	0	0	0	0	0	0	7.99297e-05	0	0	0	0	0	0	0	0	0	0	7.99297e-05	0.000239789	0.000239789	7.99297e-05	0.000399648
OTU_380	380	Proteobacteria	Alphaproteobacteria	Rhizobiales	Methylobacteriaceae			0	0	0	0	0	0	0	0	0	0	0	0	7.99297e-05	0	0	0.00439613	0	0	0	0	0	0	0	0	0	0	0	0	0	0	0	0	0	0	0	0	0	0	0	0	0	0
OTU_519	519	Proteobacteria	Deltaproteobacteria	Myxococcales	Blfdi19			0	0	0	0	0	0	0	0	0	0	0	0	0	0	0	0	0	0	0	0	0	0	0	0	0	0	0	0	0	0	0	0	7.99297e-05	0	0	0	0	0	0.000239789	0.000239789	0.000239789	0.000239789
OTU_677	677	Proteobacteria	Alphaproteobacteria	Rhodospirillales	unidentified_Rhodospirillales	Candidatus_Alysiosphaera		0	0	0	0	0	0	0	0	0	0	0	0	0	0	0	0	0	0	0	0	0	0	0	0	0	0	0	0	7.99297e-05	0	0	0	0	0	0	0	0	0	0.000399648	0.000399648	0.000239789	0.000159859
OTU_950	950	Acidobacteria	unidentified_Acidobacteria	Subgroup_5				0	0	0	0	0	0	0	0	0	0	0	0	0	0	0	0	0	0	0	0	0	0	0	0	0	0	0	0	0	0	0	0	0	0	0	0	0	0.000159859	0.000239789	7.99297e-05	0.000399648	0.000239789
OTU_473	473	Proteobacteria	Alphaproteobacteria	DB1-14				0	0	0	0	0	0	0	0	0	0	0	0	0	0	0	7.99297e-05	0	0	0	0.000559508	0	0	0	0	0.000559508	0	0	0	0	7.99297e-05	0.000479578	0	0.00103909	0.000479578	0	0	0.000319719	0	0	0	0	0
OTU_745	745	Proteobacteria	Alphaproteobacteria	Rhizobiales	Aurantimonadaceae			0	0	0	0	0	0	0	0	0	0	0	0	7.99297e-05	0	0	7.99297e-05	0	0	0	0	0	0	0	0	0.000159859	0.00183838	0	0	7.99297e-05	0	7.99297e-05	7.99297e-05	0	0	7.99297e-05	0.000159859	0	0	0.000319719	0.000159859	0	7.99297e-05
OTU_506	506	Actinobacteria	Thermoleophilia	Gaiellales				0	0	0	0	0	0	0	0	0	0	0	0	0	0	0	0	0	0	0	0	0	0	0	0	0	0	0	0	0	0	0	0	0	0	0	0	0	0	0.000559508	0.000319719	0.000319719	0.000479578
OTU_829	829	Proteobacteria	Betaproteobacteria	Nitrosomonadales	Nitrosomonadaceae			0	0	0	0	0	0	0	0	0	0	0	0	7.99297e-05	0	0	0	0	0	0	0	0	0	0	0	0	0	0	0	0	0	0	0	0	0	0	0	0	0	0.000559508	0.000399648	0.000239789	0.000239789
OTU_542	542	Acidobacteria	unidentified_Acidobacteria	Acidobacteriales	Acidobacteriaceae_.Subgroup_1.			0	0	0	7.99297e-05	0.0043162	0	0	0	0	0	0	0	0	0	0	0	0	0	0	0	0	0	0	0	0	0	0	0	0	0	0	0	0	0	0	0	0	0	0	0	0	0
OTU_545	545	Proteobacteria	Gammaproteobacteria	Xanthomonadales	Xanthomonadaceae	Dokdonella		0	0	0	0	0	0	0	0	0.000479578	0	0	0	7.99297e-05	0	0	0	0	0	0	0	0	0	0	0	0	0	0	7.99297e-05	0	0	0	0	0	0	0	0	0	0	0	7.99297e-05	7.99297e-05	0
OTU_4254	4254	Actinobacteria	unidentified_Actinobacteria	Propionibacteriales	Nocardioidaceae	Aeromicrobium	Aeromicrobium_tamlense	0	0	0	0.00167852	0	0	0	0	0	0	0	0	0	0	0	0	0	0	0	0	0.000239789	0	0	0	7.99297e-05	0	0	0	0	0	0	0	0	0	0	0	0	0	0.000159859	0	7.99297e-05	0.000159859
OTU_811	811	Actinobacteria	unidentified_Actinobacteria	Micrococcales	Dermacoccaceae	Kytococcus		0	0	0	0	0	0	0	0	0	0	0	0	7.99297e-05	0.000639437	0	0	0	0	0	0	0	0	0	7.99297e-05	0	0.0021581	0	0	0	0	0	0	0	0	0	0	0.00127887	0	0	0	0	0
OTU_428	428	Chlorobi	Ignavibacteria	Ignavibacteriales	BSV26			0	0	0	0	0.0043162	0	0	0	0	0	0	0	0	0	0	0	0	0	0	0	0	0	0	0	0	0	0	0	0	0	0	0	0	0	0	0	0	0	0	0	0	0
OTU_436	436	Proteobacteria	Alphaproteobacteria	Rhizobiales	A0839			0	0	0	0	0	0	0	0	0	0	0	0	0	0	0	0	0	0	0	0	0	0	0	0	0	0	0	0	0	0	0	0	0	0	0	0	0	0	0.000319719	0.000159859	0.000479578	0.000399648
OTU_1012	1012	Proteobacteria	Deltaproteobacteria	GR-WP33-30	unidentified_GR-WP33-30	unidentified_GR-WP33-30	delta_proteobacterium_WX81	0	0	0	0	0	0	0	0	0	0	0	0	0	0	0	0	0	0	0	0	0	0	0	0	0	0	0	0	0	0	0	0	0	0	0	0	0	0	0.000479578	0.000319719	0.000239789	0.000319719
OTU_847	847	Fusobacteria	Fusobacteriia	Fusobacteriales	Fusobacteriaceae	Fusobacterium		0	0	0	0	0	0	0	0	0	0	0	0.000319719	0.000159859	0	0	0.000319719	0	0.00231796	0	0	0	0	0	0	0	0	0	0	0	0	0.000879226	0	0	0	0.000159859	0	0	0	0	0	0	0
OTU_840	840	Acidobacteria	Holophagae	Subgroup_10	NS72			0	0	0	0	0	0	0	0	0	0	0	0	0	0	0	0	0	0	0	0	0	0	0	0	0	0.000239789	0	0	0	0	0	0	0	0	0	0	0	0	0.000239789	0.000239789	0.000479578	0.000239789
OTU_349	349	Firmicutes	Clostridia	Clostridiales	Clostridiaceae_1	Clostridium_sensu_stricto_12		0	0	0	0	0	0	0	0	0	0	0	0	0	0.00383662	0	0	0	0	0	7.99297e-05	0	0	0	0	0	0	7.99297e-05	0	0	0	0	0	0	0	0	0	0	0	0	0.000159859	0	0
OTU_528	528	Planctomycetes	Phycisphaerae	Phycisphaerales	Phycisphaeraceae	SM1A02		0	0	0	0	0	0	0	0	0	0	0	0	7.99297e-05	0	0	0	0	7.99297e-05	0	0	7.99297e-05	0	0	0	0	0	0	0	0	0	0	0	0	0	0	0	0	7.99297e-05	0.000239789	0.000319719	0.000239789	0.000719367
OTU_581	581	Gemmatimonadetes	unidentified_Gemmatimonadetes	AT425-EubC11_terrestrial_group				0	0	0	0	0	0	0	0	0	0	0	0	0	0	0.000159859	0	0	0	0	0	0	0	0	0	0	0	0	0	0	0	0	0	0	0	0	0	0	0	0.000319719	0.000479578	0.000639437	0.000239789
OTU_395	395	Actinobacteria	Nitriliruptoria	Nitriliruptorales	Nitriliruptoraceae	Nitriliruptor		0	0	0	0.00423627	0	0	0	0	0	0	0	0	0	0	0	0	0	0	0	0	0	0	0	0	0	0	0	0	0	0	0	0	0	0	0	0	0	0	0	0	0	0
OTU_1234	1234	Proteobacteria	Deltaproteobacteria	Sh765B-TzT-29				0	0	0	0	0	0	0	0	0	0	0	0	0	0	0	0	0	0	0	0	0	0	0	0	0	0	0	0	0	0	0	0	0	0	0	0	0	0.000159859	0.000239789	0.000319719	0.000639437	0.000399648
OTU_1452	1452	Acidobacteria	unidentified_Acidobacteria	Subgroup_5				0	0	0	0	0	0	0	0	0	0	0	0	0	0	0	0	0	0	0	0	0	0	0	0	0	0	0	0	0	0	0	0	0	0	0	0	0	0.000159859	0.000239789	0.000239789	0.000399648	0
OTU_1529	1529	Acidobacteria	Holophagae	Subgroup_10	ABS-19			0	0	0	0	0	0	0	0	0	0	0	0	0	0	0	0	0	0	0	0	0	0	0	0	0	0	0	0	0	0	0	0	0	0	7.99297e-05	0	0	0	0	0	0	0.000239789
OTU_605	605	Firmicutes	Bacilli	Bacillales	Bacillaceae	Bacillus	Bacillus_hackensackii	0	0	0	0	0	7.99297e-05	0	0.00399648	7.99297e-05	0	0	0	0	0	0	0	0	0	0	0	0	0	0	0	0	0	0	0	0	0	0	0	0	0	0	0	0	0	0	0	0	0
OTU_374	374	Gemmatimonadetes	unidentified_Gemmatimonadetes	Gemmatimonadales	Gemmatimonadaceae			0	0	0	0	0	0	0	0	0	0	0	0	7.99297e-05	0	0	0	0	0	0	0	0	0	0	0	0	0	0	0	0	0	0	0	0	0	0	0	0	0	0.000799297	0.000399648	7.99297e-05	0.000719367
OTU_697	697	Actinobacteria	MB-A2-108					0	0	0	0	0	0	0	0	0	0	0	0	0	0	0	0	0	0	0	0	0	0	0	0	0	0	0	0	0	0	0	0	0	0	0	0	0	0	0.000399648	0.000559508	0.000639437	0.000319719
OTU_776	776	Actinobacteria	Thermoleophilia	Gaiellales				0	0	0	0	0	0	0	0	0	0	0	0	0	0	0	0	0	0	0	0	0	0	0	0	0	0	7.99297e-05	0	0	0	0	0	0	0	0	0	0	7.99297e-05	0.000239789	0.000319719	0.000959156	0.000399648
OTU_867	867	Actinobacteria	unidentified_Actinobacteria	Propionibacteriales	Nocardioidaceae	Marmoricola		0	0	0	0	0	0	0	0	0	0	0	7.99297e-05	0	0	0	0	0	0	0	0	0	0	0	0	0	0	0	0	0	0	0	0	0	0	0	0	0	0	7.99297e-05	0.000559508	0.000159859	0.000159859
OTU_767	767	Proteobacteria	Alphaproteobacteria	Rhizobiales	Methylobacteriaceae	Methylobacterium	Methylobacteriaceae_bacterium_M6-76	0	0	0	0	0	0	0	0	0	0	0	0	0	0	0	0	0	0	0	0	0	0	0	0	0	0	0	0	0	0	0	0	7.99297e-05	0.000319719	0	0	0	0	0.000399648	0.000639437	0.000559508	0.000159859
OTU_940	940	Gemmatimonadetes	unidentified_Gemmatimonadetes	Gemmatimonadales	Gemmatimonadaceae	Gemmatimonas		0	0	0	0	0	0	0	0	0	0	0	0	0	0	0	0	0	0	0	0	0	0	0	0	0	0	0	7.99297e-05	0	0	0	0	0	0	0	0	0	0	0.000479578	0.000319719	0.000319719	0.000559508
OTU_785	785	Acidobacteria	unidentified_Acidobacteria	Subgroup_3	unidentified_Acidobacteria	Candidatus_Solibacter		0	0	0	0	0	0	0	0	0	0	0	0	0	0	0	0	0	0	0	0	0	0	0	0	0	0	0	0	0	0	0	0	0	0	0	0	0	0	0.00103909	0.000159859	0.000479578	0
OTU_432	432	Proteobacteria	Alphaproteobacteria	Rhodobacterales	Rhodobacteraceae	Rubellimicrobium		0	0	0	0	0	0	0	0	0	0	0	0	0	0	7.99297e-05	0	0	0	0	0	0	0	0	0	0	0	0	0	0	0	0	0	0	0	0	0	0	0	0	0.000159859	0	0
OTU_1165	1165	Actinobacteria	Thermoleophilia	Solirubrobacterales	Solirubrobacteraceae	Solirubrobacter		0	0	0	0	0	0	0	0	0	0	0	0	0	0	0	0	0	0	0	0	0	0	0	0	0	0	0	0	0	0	0	0	0	0	0	0	0	0	0.000399648	0.000399648	0.000159859	0.000239789
OTU_4318	4318	Actinobacteria	unidentified_Actinobacteria	Micrococcales	Microbacteriaceae	Agromyces	Agromyces_ulmi	0	0	0	0	0	0	0	0	0	0	0	0	7.99297e-05	0	0	0	0	0	0	0	0	0	0	0	0	0	0	0	0	0	0	0	0	0	0	0	0	0	0.000399648	0.000639437	7.99297e-05	7.99297e-05
OTU_2305	2305	Actinobacteria	unidentified_Actinobacteria	Micrococcales	Intrasporangiaceae	Oryzihumus		0	0	0	0	0	0	0	0	0	0	0	0	0	0	0	0	0	0	0	0	0	0	0	0	0	0	0	0	0	0	0	0	0	0	0	0	0	0	0	0.000159859	0.000159859	0.000399648
OTU_413	413	Proteobacteria	Alphaproteobacteria	Caulobacterales	Caulobacteraceae			0	0	0	0	0	0	0	0	0	0	0	0	0	0	0	0	0	0	0	0	0	0	0	0	0	0	0	0	0	0	0	0	0	0	0	0	0	0	0.000159859	0	0	0.000479578
OTU_610	610	Gemmatimonadetes	unidentified_Gemmatimonadetes	Gemmatimonadales	Gemmatimonadaceae			0	0	0	0	0	0	0	0	0	0	0	0	7.99297e-05	0	0	0	0	0	0	0	0	0	0	0	0	0	0	0	0	0	0	0	0	0	0	0	0	0	0.000559508	0.000639437	0.000319719	0.000479578
OTU_462	462	Firmicutes	Bacilli	Bacillales	Family_XII	Exiguobacterium		0	0	0	0	0	0	0	0	0	0	0	0.000159859	0	7.99297e-05	0	0	0	0	0	0	0.00167852	0	0.000319719	7.99297e-05	0	0.000959156	0	0	0	0	0	0	0.000559508	0	0	0	0	0	0	0	0	0
OTU_586	586	Proteobacteria	Alphaproteobacteria	Rhodospirillales				0	0	0	0	0	0	0	0	0	0	0	0	0	0	0	0	0	0	0	0	0	0	0	0	0	0	0	0	0	0	0	0	0	0	0	0	0	0	0.000239789	0.000239789	0.000239789	0.000399648
OTU_714	714	Proteobacteria	Alphaproteobacteria	Rhizobiales	A0839			0	0	0	0	0	0	0	0	0	0	0	0	0	0	0	0	0	0	0	0	0	0	0	0	0	0	0	0	0	0	0	0	0	0	0	0	0	0	0	7.99297e-05	0.000319719	0
OTU_535	535	Actinobacteria	unidentified_Actinobacteria	Pseudonocardiales	Pseudonocardiaceae	Pseudonocardia		0	0	0	0	0	0	0	0	0	0	0	0	0	0	0	0	0	0	0	0	0	0	0	0	0	0	0	0	0	0	0	0	0	0	0	0	0	0	0.000159859	0.000319719	0	7.99297e-05
OTU_4359	4359	Actinobacteria	Thermoleophilia	Gaiellales	Gaiellaceae	Gaiella		0	0	0	0	0	0	0	0	0	0	0	0	0	0	0	0	0	0	0	0	0	0	0	0	0	0	0	0	0	0	0	0	0	0	0	0	7.99297e-05	0	0.000399648	7.99297e-05	0.000239789	0.000399648
OTU_464	464	Actinobacteria	unidentified_Actinobacteria	Propionibacteriales	Nocardioidaceae	Nocardioides		0	0	0	0	0	0	0.000159859	0	0	0	0.00143873	0	0	0	7.99297e-05	0.000799297	0	0	0	0	0	0	0	0	0	0	0	0	0	0	0	0	0	0	0	0	0	0	7.99297e-05	0	0	0
OTU_2139	2139	Acidobacteria	unidentified_Acidobacteria	Subgroup_3	unidentified_Acidobacteria	Candidatus_Solibacter		0	0	0	0	0	0	0	0	0	0	0	0	0	0	0	0	0	0	0	0	0	0	0	0	0	0	0	0	0	0	0	0	0	0	0	0	0	0	0.000159859	0.000479578	0.000319719	0
OTU_463	463	Actinobacteria	unidentified_Actinobacteria	Pseudonocardiales	Pseudonocardiaceae	Saccharopolyspora		0	0	0	0	0	0	0	0	0	0	0.00231796	0	0	0	0	0	0	0	0	0	0	0	0	7.99297e-05	0	0.00159859	0	0	0	0	0	0	0	0	0	0	0	0	0	0	0	0
OTU_430	430	Actinobacteria	Thermoleophilia	Solirubrobacterales	Patulibacteraceae	Patulibacter		0	0	0	0	0	0	0	0	0.00239789	0	0	0.000239789	0	0	0	0	0	0	0	0	0	0	0	0	0	0	0	0	0	0	0	0	0	0	0	0	0	7.99297e-05	0.000239789	0.000319719	0	0
OTU_376	376	Proteobacteria	Alphaproteobacteria	Rhodospirillales	MND8			0	0	0	0	0	0	0	0	0	0	0	0	0	0	0	0	0	0	0	0	0	0	0	0	0	0	0	0	0	0	0	0	0	0	0	0	0	0	0.000159859	0.000239789	0.000239789	0.000239789
OTU_453	453	Acidobacteria	unidentified_Acidobacteria	Acidobacteriales	Acidobacteriaceae_.Subgroup_1.			0	0	0	0	0.00391655	0	0	0	0	0	0	0	0	0	0	0	0	0	0	0	0	0	0	0	0	0	0	0	0	0	0	0	0	0	0	0	0	0	0	0	0	0
OTU_579	579	Proteobacteria	Betaproteobacteria	Rhodocyclales	Rhodocyclaceae	Zoogloea		0.00391655	0	0	0	0	0	0	0	0	0	0	0	0	0	0	0	0	0	0	0	0	0	0	0	0	0	0	0	0	0	0	0	0	0	0	0	0	0	0	0	0	0
OTU_1061	1061	Proteobacteria	Deltaproteobacteria	Oligoflexales	Oligoflexaceae			0	0	0	0	0	0	0	0	0	0	0	0.000159859	7.99297e-05	0	0	0	0	0	0	0	0	0	0	0	0	0	0	0	0	0	0	0	0	0	0	0	0	0	0.000399648	7.99297e-05	0.000159859	0.000239789
OTU_466	466	Nitrospirae	Nitrospira	Nitrospirales	Nitrospiraceae			0	0	0	0	0	0	0	0	0	0	0	0	0	0	0	0	0	0	0	0	0	0	0	0	0	7.99297e-05	0	0	0	0	0	0	0	0	0	0	0	0	0.000399648	0.000639437	0.000239789	0.000399648
OTU_772	772	Actinobacteria						0	0	0	0	0	0	0	0	0	0	0	0	0	0	0	0	0	0	0	0	0	0	0	0	0	0	0	0	0	0	0	0	0	0	0	0	7.99297e-05	0	0.000319719	0.000319719	0.000319719	0.000319719
OTU_563	563	Proteobacteria	Alphaproteobacteria	Rhizobiales	Phyllobacteriaceae	Mesorhizobium		0	0	0	0	0	0	0	0	0	0	0	0	0	0	0	0	0	0	0	0	0	0	0	0	0	0	0	0	0	0	0	0	0	0	0	0	0	0	0.000319719	7.99297e-05	0.000719367	0.000239789
OTU_3910	3910	Proteobacteria	Alphaproteobacteria	Rhodospirillales	Acetobacteraceae			0	0	0	0	0	0	0	0	0	0	0	0	0	0	0	0	0	0	0	0	0	0	0	0	0	0	0	0	0.000159859	0	0	0	7.99297e-05	0	0	0	0	0	0	7.99297e-05	7.99297e-05	0
OTU_504	504	Proteobacteria	Gammaproteobacteria	Xanthomonadales	Solimonadaceae			0	0	0	0	0	0	0	0.000639437	0	7.99297e-05	0	0.000239789	0	0	0.000239789	0	0	0.00175845	0.000399648	0	0	0	0	0	0	0	0	0	0	0	0	0	0	0	0	0	0	0	7.99297e-05	0	0	7.99297e-05
OTU_630	630	Firmicutes	Bacilli	Lactobacillales	Leuconostocaceae	Weissella		0	0	0	0	0	0	0	0	0	0	0	0	0	0	0	0	0	0.00351691	7.99297e-05	0	0	0	0	0	0	0	0	0	0	0	0	0	0	0	0	0	0	0	0	0	0	0
OTU_2866	2866	Proteobacteria	Deltaproteobacteria	Myxococcales	Haliangiaceae	Haliangium		0	0	0	0	0	0	0	0	0	0	0	0	0	0	0	0	0	0	0	0	0	0	0	0	0	0	0	0	0	0	0	0	0	0	0	0	0	7.99297e-05	0.000399648	0.000319719	7.99297e-05	0.000239789
OTU_546	546	Gemmatimonadetes	unidentified_Gemmatimonadetes	AT425-EubC11_terrestrial_group				0	0	0	0	0	0	0	0	0	0	0	0	0	0	0	0	0	0	0	0	0	0	0	0	0	0	0	0	0	0	0	0	0	0	0	0	7.99297e-05	0	7.99297e-05	0	0.000159859	0
OTU_4771	4771	Proteobacteria	Alphaproteobacteria	Rhizobiales	unidentified_Rhizobiales	Nordella		0	0	0	0	0	0	0	0	0	0	0	0	0	0	0	0	0	0	0	0	0	0	0	0	0	0	0	0	0	0	0	0	0	0	0	0	0	0	0.000319719	0.000239789	0.000159859	0.000319719
OTU_1961	1961	Actinobacteria	Acidimicrobiia	Acidimicrobiales				0	0	0	0	0	0	0	0	0	0	0	0	0	0	0	0	0	0	0	0	0	0	0	0	0	0	0	0	0	0	0	0	0	0	0	0	0	7.99297e-05	0.000239789	0.000159859	7.99297e-05	0.000239789
OTU_549	549	Actinobacteria	unidentified_Actinobacteria	Micrococcales	Sanguibacteraceae	Sanguibacter		0	0	0	0	0	0	0	0	0	0	0	0	0	0.0021581	0	0	0	0.00167852	0	0	0	0	0	0	0	0	0	0	0	0	0	0	0	0	0	0	0	0	0	0	0	0
OTU_456	456	Proteobacteria	Alphaproteobacteria	Rhizobiales	Rhizobiaceae	Rhizobium		0	0	0	0	0	0	0	0	0	0	0	0	0	0	0	0	0	0	0	0	0	0	7.99297e-05	0	0	0	0	0	0	0	7.99297e-05	0	0.00335705	7.99297e-05	0	7.99297e-05	0	0	0	0	0	0
OTU_1026	1026	Proteobacteria	Alphaproteobacteria	Caulobacterales	Hyphomonadaceae	Woodsholea		0	0	0	0	0	0	0	0	0	0	0	0	0	0	0	0	0	0	0	0	0	0	0	0	0	0	0	0	0	0	0	0	0	0	0	0	0	0	7.99297e-05	0	0.000239789	0.000239789
OTU_1423	1423	Actinobacteria	MB-A2-108					0	0	0	0	0	0	0	0	0	0	0	0	0	0	0	7.99297e-05	7.99297e-05	0	0	0	0	0	0	0	0	0	0.000159859	0	0	0	0	0	0	0	0	0	0	7.99297e-05	0.000399648	0.000479578	0.000239789	0.000479578
OTU_449	449	Proteobacteria	Deltaproteobacteria	Myxococcales	Haliangiaceae	Haliangium		0	0	0	0	0	0	0	0	0	0	0	0	0	0	0	0	0	0	0	0.000719367	0	0	0	0	0	0	0	0	0	0	0	0	0	0	0	0	0	0	0.000319719	0.000159859	0	7.99297e-05
OTU_1058	1058	WCHB1-60						0	0	0	0	0	0	0	0	0	0	0.000319719	0	0	0	0	0	0	0	0	0	0	0	0	0	0	0	7.99297e-05	0	0	7.99297e-05	7.99297e-05	0	0	0	0	0	0	0	0.000159859	0.000159859	7.99297e-05	0.000479578
OTU_2031	2031	Proteobacteria	Alphaproteobacteria	Rhodospirillales	unidentified_Rhodospirillales	Candidatus_Alysiosphaera		0	0.00119894	0	0	0	0	0.000399648	0	0	0	0	0	0	0	0	0	0	0	0	0	0	0	0	0	0	0	0	0	0	0	0	0	0	0	0	0	0.000159859	0	0.000159859	7.99297e-05	0.000239789	0
OTU_575	575	Proteobacteria	Alphaproteobacteria	Rhizobiales	unidentified_Rhizobiales	Phreatobacter	alpha_proteobacterium_KC-IT-H2	0	0	0	0	0	0	0	0	0	0	0	0	0	0	0	0	0	7.99297e-05	0	0	0	0	0	0	0	0	0	0	0	0	0	0	0	0	0	0	0	0	0.000239789	0.000159859	7.99297e-05	0.000319719
OTU_864	864	Gemmatimonadetes	unidentified_Gemmatimonadetes	AT425-EubC11_terrestrial_group				0	0	0	0	0	0	0	0	0	0	0	0	0	0	0	0	0	0	0	0	0	0	0	0	0	0	0	0	0	0	0	0	0	0	0	0	0	0	0.000959156	0.00103909	0.000319719	0.000159859
OTU_2976	2976	Proteobacteria	Alphaproteobacteria	Rhodobacterales	Rhodobacteraceae			0	0	0	0	0	0	0	0	0	0	0	0	0	0	0	0.0029574	0	0	0	0	0	0	0	0	0	0	0	0	0	0	0	0	0	0	0	0	0	0	0	7.99297e-05	0	7.99297e-05
OTU_866	866	Bacteroidetes	Flavobacteriia	Flavobacteriales	Flavobacteriaceae	Flavobacterium		0	0	0	0	0	0	0	0	0	0	0.000159859	0	0	0	0	0	0	0	0	0	0	0	0	0	0	0	7.99297e-05	0.000799297	0.000159859	0	0	0	0	0	0	0	0	0	7.99297e-05	0	0	0.000239789
OTU_1214	1214	Gemmatimonadetes	unidentified_Gemmatimonadetes	Gemmatimonadales	Gemmatimonadaceae			0	0	0	0	0	0	0	0	0	0	0	0	0	0	0	0	0	0	0	0	0	0	0	0	0	0	0	0	0	0	0	0	0	0	0	0	0	0	0.000239789	0.000559508	0.000479578	0.000559508
OTU_804	804	Actinobacteria	Thermoleophilia	Gaiellales				0	0	0	0	0	0	0	0	0	0	0	0	0	0	0	0	0	0	0	0	0	0	0	0	0	0	0	0	0	0	0	0	0	0	0	0	0	0	0.000159859	0.000399648	0.000239789	0.000319719
OTU_474	474	Bacteroidetes	Flavobacteriia	Flavobacteriales	Flavobacteriaceae	Flavobacterium		0	0	0	0	0	0	0	0	0	0	0	0.000399648	0	0	0	0	0	7.99297e-05	0	0	0	0	0	0	0	7.99297e-05	0	0	0	0	0	0	0.000159859	0.000159859	0	0	0.000159859	0	0.000319719	0.000159859	0.000239789	7.99297e-05
OTU_499	499	Proteobacteria	Betaproteobacteria	Burkholderiales	Alcaligenaceae			0	0	0	0	0	0	0	0	0	0	0	0	0	0	0	0	0	0	0	0	0	0	0	0	0	0	0	0	0	0	0	0	0	0	0	0	0.000239789	0	0	0	0	0
OTU_576	576	Proteobacteria	Alphaproteobacteria	Caulobacterales	Hyphomonadaceae			0	0	0	0.00207817	0	0.000559508	0	0	0	0	0	0.000479578	0	0	0	0	0	0.000399648	0	0	0	0	0	0	0	0	0	0	0	0	0	0	0	0	0	0	0	0	0	0	0	0
OTU_490	490	Actinobacteria	unidentified_Actinobacteria	Micromonosporales	Micromonosporaceae			0	0	0	0	0	0	0	0	0	0	0	0	0	0	0	0	0	7.99297e-05	0	0.00127887	0.00111902	7.99297e-05	0	0.000159859	0	0	0	0	0	0	0	0	0.000239789	0	0	0	0	7.99297e-05	0	0	0	7.99297e-05
OTU_397	397	Firmicutes	Bacilli	Lactobacillales	Lactobacillaceae	Lactobacillus	Lactobacillus_animalis	0	0	0	0	0	0	0	0	0	0	0	0	0	0	0	0	0	0	0	0	0	0	0	0	0	0	0	0	0	0.00319719	0	0	0	7.99297e-05	0	7.99297e-05	0	0	0	0	0	0
OTU_642	642	Proteobacteria	Deltaproteobacteria	GR-WP33-30				0	0	0	0	0	0	0	0	0	0	0	7.99297e-05	0	0	0	0	0	0	0	0	0	0	0	0	0	0	0	0	0	0	0	0	0	0	0	0	0	0	7.99297e-05	7.99297e-05	0.000159859	0.000319719
OTU_435	435	Actinobacteria	unidentified_Actinobacteria	Frankiales	Sporichthyaceae			0	0	0	0	0	0	0	0	0	0	0	0	0	0	0	0	0	0	0	0	0	0	0	0	0	0	0	0	0	0	0	0	0	0	0	0	0.000159859	0	0.000319719	0.000319719	0.000159859	0.000239789
OTU_634	634	Proteobacteria	Deltaproteobacteria	Bdellovibrionales	Bdellovibrionaceae			0	0	0	0	0	0	0	0	0	0	0	0	0	0	0	0	0	0	0	0	0	0	0	0	0	7.99297e-05	0	0	0	0	0	0	0	0	0	0	0	7.99297e-05	7.99297e-05	0.000479578	0.000559508	0.000239789
OTU_488	488	Proteobacteria	Deltaproteobacteria	Myxococcales	Haliangiaceae	Haliangium		0	0	0	0	0	0	0	0	0	0	0	0	0	0	0	0	0	0	0	0	0	0	0	0	0	0	0	0	7.99297e-05	0	0	0	0	0	0	0	0.000159859	0	0.000319719	0.000399648	0.000399648	0.000239789
OTU_405	405	Actinobacteria	Acidimicrobiia	Acidimicrobiales	OM1_clade			0	0	0	0	0	0	0	0	0	0	0	0	0	0	0	0	0	0	0	0	0	0	0	0	0	0	0	0	0	0	0	0	0	0	0	0	0	0.000239789	0.000319719	0.000159859	7.99297e-05	0.000159859
OTU_1465	1465	Verrucomicrobia	OPB35_soil_group					0	0	0	0	0	0	0	0	0	0	0	0	0	0	0	0	0	0	0	0	0	0	0	0	0	0	0	0	0	0	0	0	0	0	0	0	0	0	0.000479578	0.000319719	0.000399648	0.000159859
OTU_989	989	Actinobacteria	unidentified_Actinobacteria	Micromonosporales	Micromonosporaceae	Rhizocola		0	0	0	0	0	0	0	0	0	0	0	0	0	0	0	0	0	0	0	0	0	0	0	0	0	0	0	0	0	0	0	0	0	0	0	0	0	0	0.000479578	0.000719367	0.000639437	0
OTU_548	548	Acidobacteria	unidentified_Acidobacteria	Subgroup_3	unidentified_Acidobacteria	Bryobacter	Acidobacteria_bacterium_IGE-015	0	0	0	0	0	0	0	0	0	0	0	0	0	0	0	0	0	0	0	0.000159859	0	0	0	0	0	0	0	0	0	0	0	0	0	0	0	0	0	0	0.000159859	7.99297e-05	7.99297e-05	0.000159859
OTU_760	760	Actinobacteria	Thermoleophilia	Solirubrobacterales	FFCH13075			0	0	0	0	0	0	0	0	0	0	0	0	0	0	0	0	0	0	0	0	0	0	0	0	0	0	0	0	0	0	0	7.99297e-05	0	0	0	0	0.000159859	0	0.000479578	0.000159859	0.000159859	0.000159859
OTU_843	843	Proteobacteria	Deltaproteobacteria	Sh765B-TzT-29				0	0	0	0	0	0	0	0	0	0	0	0	0	0	0	0	0	0	0	0	0	0	0	0	0	0	0	0	0	0	0	0	0	0	0	0	0	0	0.000319719	0.000239789	0.000799297	0.000399648
OTU_994	994	Actinobacteria	unidentified_Actinobacteria	Frankiales	Cryptosporangiaceae	Fodinicola		0	0	0	0	0	0	0	0	0	0	0	0	0	0	0	0	0	0	0	0	0	0	0	0	0	0	0	0	0	0	0	0	0	0	0	0	0	7.99297e-05	7.99297e-05	0.000159859	0.000159859	7.99297e-05
OTU_3764	3764	Proteobacteria	Gammaproteobacteria	Xanthomonadales	Xanthomonadaceae	Lysobacter		0	0.0021581	0	0	0	0	7.99297e-05	0	0	0	0	0.000159859	0	0	0	0	0	0	0	0	0	0	0	0	0	0	0.000959156	0	0	0	0	0	0	0	0	0	0	0	0	0	0	0
OTU_830	830	Proteobacteria	Alphaproteobacteria	Rhizobiales	Methylobacteriaceae	Methylobacterium		0.0013588	0	0	0	0	0	0	0	0.00183838	0	0	0	0	0	0	0	0	0	0	0	0	0	7.99297e-05	0	0	0	0	0	0	0	0	0	0	0	0	0	0	0	0	0	0	0
OTU_565	565	Actinobacteria	unidentified_Actinobacteria	Corynebacteriales	Corynebacteriaceae	Corynebacterium_1		0	0	0	0	0	0	0	0	0	0	0	0	7.99297e-05	0	0	0	0	0	0	0	0	0	0	0	0	0.00311726	0	0	0	0	0	0	0	0	0	0	0	0	7.99297e-05	0	0	0
OTU_665	665	Firmicutes	Clostridia	Clostridiales	Clostridiaceae_1	Clostridium_sensu_stricto_10		0	0	0	0	0	0	0	0	0	0	0	0	0.00311726	0	0	0	0	0	0	0	0	0	0	0	0	0	0	0	0	0	0	0	0	0	0	0	0	0	0	7.99297e-05	0	0
OTU_589	589	Bacteroidetes	Flavobacteriia	Flavobacteriales	Flavobacteriaceae	Capnocytophaga	Capnocytophaga_gingivalis	0	0	0	0	0	0	0	0	0	0	0.00327712	0	0	0	0	0	0	0	0	0	0	0	0	7.99297e-05	0	0	0	0	0	0	0	0	0	0	0	0	0	0	0	0	0	0
OTU_3279	3279	Actinobacteria	unidentified_Actinobacteria	Propionibacteriales	Propionibacteriaceae	Tessaracoccus		0	0	0	0	0	0	0	0	0	0	0	0	0	0	0	0	0.00335705	0	0	0	0	0	0	0	0	0	0	0	0	0	0	0	0	0	0	0	0	0	0	0	0	0
OTU_401	401	Actinobacteria	unidentified_Actinobacteria	Micrococcales	Dermabacteraceae			0	0	0	0	0	0	0	0	0	0	0	0.000159859	0	0	0	0	0.00319719	0	0	0	0	0	0	0	0	0	0	0	0	0	0	0	0	0	0	0	0	0	0	0	0	0
OTU_443	443	Actinobacteria	Thermoleophilia	Solirubrobacterales	TM146			0	0	0	0	0	0	0	0	0	0	0	0	0	0	0	0	0.00263768	0	7.99297e-05	0.000159859	0	0	0	7.99297e-05	0	0	0	0	0	0	0	0	0	0	0	0	0	0	0	0	0	0
OTU_879	879	Proteobacteria	Alphaproteobacteria	Rhodospirillales	MND8			0	0	0	0	0	0	0	0	0	0	0	0	0	0	7.99297e-05	0	0	0	0	0	0	0	0	0	0	0	0	0	0	0	0	0	0	0	0	0	0	0	0.000239789	7.99297e-05	0.000399648	0.000239789
OTU_1504	1504	Proteobacteria	Alphaproteobacteria	Caulobacterales	Hyphomonadaceae	Woodsholea		0	0	0	0	0	0	0	0	0	0	0	0	0	0	0.000159859	0	0	0	0	0	0	0	0	7.99297e-05	0	0	0	7.99297e-05	0	0	0	0	0.000479578	0	0	0	0	0	0	0	0	0
OTU_553	553	Proteobacteria	Gammaproteobacteria	Xanthomonadales	unidentified_Xanthomonadales	Steroidobacter		0	0	0	0	0	0	0	0	0	0	0	0	0.000639437	0	7.99297e-05	0	0	0	0	0	7.99297e-05	0	0	0.000159859	0	0	0	7.99297e-05	7.99297e-05	0	0	0	0	0	0	0	0.000639437	0	7.99297e-05	0.000159859	0.000319719	7.99297e-05
OTU_3575	3575	Firmicutes	Clostridia	Clostridiales	Clostridiaceae_1	Clostridium_sensu_stricto_8		0	0	0	0	0	0	0.00271761	0	0	0	0	0	0	0	0.000479578	0	0	0	0	0	0	0	0	0	0	0	0	0	0	0	0	0	0	0	0	0	0	0	0	0	0	0
OTU_655	655	JL-ETNP-Z39						0	0	0	0	0	0	0	0	0	0	0	0	0	0	7.99297e-05	0	0	0	0	0	0	0	0	0	0	0	0	0	0	0	0	0	0	0	0	0	0	0	0.000159859	7.99297e-05	0.000159859	7.99297e-05
OTU_954	954	Proteobacteria	Alphaproteobacteria	Rhodospirillales				0	0	0	0	0	0	0	0	0	0	0	0	0	0	0	0	0	0	0	0	0	0	0	0	7.99297e-05	0	0	0	0	0	0	0	0	0	0	0	0	7.99297e-05	0	7.99297e-05	0.000479578	0.000159859
OTU_431	431	Bacteroidetes	Sphingobacteriia	Sphingobacteriales	Saprospiraceae			0	0	0	0	0	0	0	0	0	0	0	7.99297e-05	0	0	0	0	0	0	0	0	0	0	0	0	0	0	0	0	0	0	0	0	0	0	0	0	0	0	0.000239789	0	0	0.000559508
OTU_708	708	Bacteroidetes	Bacteroidia	Bacteroidales	Prevotellaceae	Prevotella_6	Prevotella_corporis	0	0	0	0	0	0	0	0	0.000559508	0	0	0	0.000159859	0	0.00207817	0	0	0	0	0.000319719	0	0	0	0	0	0	0	0	0	0	0	0	0.000159859	0	0	0	0	0	0	0	0	0
OTU_497	497	Bacteroidetes	Bacteroidia	Bacteroidales	Porphyromonadaceae	Dysgonomonas		0	0	0	0	0	0	0	0	0	0	0	0	0	0	0	0	0	0.000159859	0	0	0	0	0	0	0	0	0	0	0	0	7.99297e-05	0	0	0	0	0	0	0	0	0	0	0
OTU_4595	4595	Firmicutes	Bacilli	Bacillales	Bacillaceae	Oceanobacillus	Oceanobacillus_sp._S5	0	0	0	0	0	0	0	0	0	0	0	0	0	0	0	0	0	0.00311726	0	0	0	0	0	0	0	0	0	0	0	0	0	0	0	0	0	0	0	0	0	0	0	0
OTU_621	621	Proteobacteria	Deltaproteobacteria	GR-WP33-30				0	0	0	0	0	0	0	0	0	0	0	0	0	0	0	0	0	0	0	0	0	0	0	0	0	0	0	0	0	0	0	0	0	0	0	0	0	0	7.99297e-05	7.99297e-05	0.000159859	7.99297e-05
OTU_797	797	Proteobacteria	Betaproteobacteria					0	0	0	0	0	0	0	0	0	0	0	0	0	0	0	0	0	0	0	0	0	0	0	0	0	0	0	0	0	0	0	0	0	0	0	0	0	0	0.000159859	0.000399648	0	0.000319719
[truncated: 2,690 more rows]
[truncated: 16 more columns]
