# Supplementary material for: Diversity analysis of the rhizospheric and endophytic bacterial communities of Senecio vulgaris L. (Asteraceae) in an invasive range
Source: PeerJ. 2019 Jan 7;6:e6162. doi: 10.7717/peerj.6162 (PMC6327885; doi:10.7717/peerj.6162)
Supplement: Supplemental Information 14 [file peerj-07-6162-s014.xlsx]

## Sheet: sheet1
location	f.location	type	group	Sample_name	observed_species	shannon	simpson	chao1	ACE	goods_coverage	PD_whole_tree
1	l1	leaf	L1	L1b	81	4.441	0.913	115	110.668	0.999	13.82
1	l1	leaf	L1	L1c	97	4.563	0.912	103	109.262	0.999	22.355
1	l1	leaf	L1	L1d	74	4.173	0.893	79	83.723	0.999	12.835
1	l1	leaf	L1	L1e	91	3.497	0.817	108.5	112.419	0.999	16.159
1	l1	leaf	L1	L1f	104	4.95	0.93	112.25	116.456	0.999	24.204
2	l2	leaf	L2	L2a	98	3.952	0.884	126.875	126.176	0.998	14.116
2	l2	leaf	L2	L2b	162	5.152	0.944	302.6	205.337	0.997	21.686
2	l2	leaf	L2	L2c	133	4.628	0.903	162.545	168.005	0.998	18.061
2	l2	leaf	L2	L2d	199	5.176	0.929	239.6	220.929	0.998	26.823
2	l2	leaf	L2	L2e	107	4.866	0.938	157.6	139.923	0.998	15.522
3	l3	leaf	L3	L3a	217	4.756	0.913	297.161	327.857	0.994	28.166
3	l3	leaf	L3	L3b	409	5.159	0.897	536.5	568.508	0.989	46.229
3	l3	leaf	L3	L3c	484	5.187	0.905	817.014	896.46	0.982	52.854
3	l3	leaf	L3	L3d	290	4.241	0.851	502.758	489.25	0.99	37.461
3	l3	leaf	L3	L3e	472	4.058	0.703	851.844	876.589	0.982	53.065
4	l4	leaf	L4	L4a	286	4.798	0.884	450.156	472.728	0.992	34.845
4	l4	leaf	L4	L4b	192	4.847	0.925	315.913	387.605	0.994	25.079
4	l4	leaf	L4	L4c	381	5.331	0.932	628.519	701.153	0.987	45.206
4	l4	leaf	L4	L4d	248	1.862	0.349	356.571	363.779	0.992	29.794
1	l1	root	R1	R1b	266	5.313	0.947	367.077	331.523	0.994	33.57
1	l1	root	R1	R1c	285	5.273	0.944	332.275	331.547	0.995	33.711
1	l1	root	R1	R1d	182	3.346	0.785	326.391	351.468	0.993	24.155
1	l1	root	R1	R1e	151	4.105	0.898	247.316	257.679	0.995	17.946
1	l1	root	R1	R1f	302	4.677	0.919	447.887	524.589	0.989	35.671
2	l2	root	R2	R2a	372	5.386	0.948	551.312	595.11	0.988	41.456
2	l2	root	R2	R2b	432	5.298	0.941	687.563	764.024	0.985	49.435
2	l2	root	R2	R2c	316	4.773	0.912	578	526.296	0.989	40.759
2	l2	root	R2	R2d	445	4.803	0.902	771.182	769.41	0.983	51.412
2	l2	root	R2	R2e	343	3.905	0.82	545.232	560.825	0.988	40.124
3	l3	root	R3	R3a	193	3.169	0.767	325	382.527	0.993	26.675
3	l3	root	R3	R3b	287	3.822	0.791	611.333	563.333	0.989	37.8
3	l3	root	R3	R3c	301	4.424	0.884	452.25	460.032	0.99	32.42
3	l3	root	R3	R3d	350	4.817	0.912	544.264	564.377	0.988	40.887
3	l3	root	R3	R3e	313	4.129	0.786	412.222	404.253	0.992	39.822
4	l4	root	R4	R4a	207	3.585	0.793	270.171	280.458	0.995	27.613
4	l4	root	R4	R4b	144	2.612	0.68	244.8	267.061	0.995	19.639
4	l4	root	R4	R4c	376	3.728	0.8	640.098	669.986	0.986	45.061
4	l4	root	R4	R4d	434	5.302	0.94	848.75	991.211	0.981	48.835
1	l1	soil	RS1	RS1b	1475	8.65	0.993	2047.54	2037.14	0.958	110.698
1	l1	soil	RS1	RS1c	1437	8.355	0.988	1972.17	2014.88	0.958	110.704
1	l1	soil	RS1	RS1d	1382	8.304	0.988	1964.04	1951.47	0.959	105.583
1	l1	soil	RS1	RS1e	1506	8.623	0.993	2119.59	2133.75	0.955	114.62
1	l1	soil	RS1	RS1f	1503	8.752	0.994	1982.92	2072.7	0.958	112.828
2	l2	soil	RS2	RS2a	1588	8.825	0.994	2237.29	2277.71	0.952	119.137
2	l2	soil	RS2	RS2b	1540	8.736	0.992	2126.43	2152.86	0.955	117.175
2	l2	soil	RS2	RS2c	1416	8.694	0.993	1796.86	1857.58	0.964	107.886
2	l2	soil	RS2	RS2d	1380	8.406	0.991	1758.72	1898.61	0.962	108.195
2	l2	soil	RS2	RS2e	1405	8.33	0.989	1885.83	1979.89	0.959	108.133
3	l3	soil	RS3	RS3a	1419	8.522	0.992	1839.91	1931.28	0.961	114.895
3	l3	soil	RS3	RS3b	1603	8.529	0.99	2342.42	2468.56	0.947	121.656
3	l3	soil	RS3	RS3c	1511	8.632	0.991	2069.18	2058.32	0.957	114.038
3	l3	soil	RS3	RS3d	1485	8.633	0.993	2051.26	2067.68	0.957	112.335
3	l3	soil	RS3	RS3e	1643	8.779	0.994	2294.5	2381.82	0.949	127.088
4	l4	soil	RS4	RS4a	1433	8.686	0.994	1910.6	1969.83	0.96	113.281
4	l4	soil	RS4	RS4b	1137	7.84	0.986	1560.18	1601.79	0.967	93.811
4	l4	soil	RS4	RS4c	1136	7.022	0.955	1616.17	1708.16	0.963	96.212
4	l4	soil	RS4	RS4d	1314	8.318	0.992	1770.48	1886.99	0.961	107.564
