# Supplementary material for: Diversity analysis of the rhizospheric and endophytic bacterial communities of Senecio vulgaris L. (Asteraceae) in an invasive range
Source: PeerJ. 2019 Jan 7;6:e6162. doi: 10.7717/peerj.6162 (PMC6327885; doi:10.7717/peerj.6162)
Supplement: Supplemental Information 15 [file peerj-07-6162-s015.csv]

	OTU	phylum.x	class.x	order.x	family.x	genus.x	species	L1b	L1c	L1d	L1e	L1f	L2a	L2b	L2c	L2d	L2e	L3a	L3b	L3c	L3d	L3e	L4a	L4b	L4c	L4d
1	OTU_10	Firmicutes	Bacilli	Bacillales	Family_XII	Exiguobacterium	Exiguobacterium_sibiricum	0.119015267	0.09703461	0.000159859	0.020382064	0.100231796	0.000319719	0.002238031	0.000719367	7.99E-05	7.99E-05	0.000959156	0.001678523	0.00247782	0.001039086	0.002238031	0.005834865	0.164894892	0.001838382	0.80617057
2	OTU_113	Actinobacteria	unidentified	Micrococcales	Brevibacteriaceae	Brevibacterium	Brevibacterium_casei	0.024458477	0.006953881	7.99E-05	0.000799297	0	0.010710575	0.004316202	0.00231796	0.001198945	0.013348254	0.005275358	0.000959156	0.000959156	0	0.000559508	0	0	0	7.99E-05
3	OTU_13	Proteobacteria	Alphaproteobacteria	Sphingomonadales	Sphingomonadaceae	Sphingomonas	Sphingomos_faeni	0	0	0.000159859	0.003357046	7.99E-05	0.0094317	0.03780673	0.013588043	0.182479418	0.01406762	0.032291583	0.013508113	0.017025018	0.003436975	0.006314443	0.055710974	7.99E-05	0.008952122	0.001838382
4	OTU_1340	Proteobacteria	Alphaproteobacteria	Caulobacterales	Caulobacteraceae	Brevundimonas		0.008712333	0.012069379	7.99E-05	7.99E-05	0.001358804	0.002957397	0.002238031	0.005675006	0.005675006	0.000479578	0.002557749	0.001518664	0.000559508	0.000479578	0.000959156	0.000319719	0.005035569	0.000239789	0.001758453
5	OTU_14	Proteobacteria	Gammaproteobacteria	Pseudomonadales	Pseudomonadaceae	Pseudomonas		0.008392614	0.001998242	0	0	0.001119015	0.0094317	0.013588043	0.00247782	0.000799297	0.001119015	0.002797538	0.011589801	0.003756694	0.068339861	0.00239789	0.012469027	0.002078171	0.126768444	0.005275358
6	OTU_1507	Proteobacteria	Alphaproteobacteria	Rhizobiales	Rhizobiaceae	Ensifer		0.02126129	0.015266565	0.011190153	0.004316202	0.009191911	0.003756694	0.013188394	0.013268324	0.005515147	0.004316202	0.010151067	0.018303893	0.01662537	0.020302134	0.010630645	0.003037327	0.013508113	0.009671489	0.001758453
7	OTU_1514	Proteobacteria	Betaproteobacteria	Burkholderiales	Oxalobacteraceae	/		0	0	7.99E-05	0.008392614	0	0.040524339	0.000159859	0.001438734	0.006714092	0.000239789	0.012628887	0.010310926	0.001598593	7.99E-05	0.002637679	0.008392614	7.99E-05	0.001518664	0.000319719
8	OTU_16	Bacteroidetes	Flavobacteriia	Flavobacteriales	Flavobacteriaceae	Flavobacterium	Flavobacterium_pectinovorum	0	0	0	0	7.99E-05	7.99E-05	0	0.00247782	0.005754936	0.007673248	0.00239789	0.004316202	0.010071137	0.001918312	0.004555991	0.008712333	0.000799297	0.003436975	0.001998242
9	OTU_1674	Proteobacteria	Gammaproteobacteria	Pseudomonadales	Pseudomonadaceae	/		0.042043002	0	0	7.99E-05	0	0.000799297	0.00711374	0.003357046	0	0	0.000319719	0.000479578	0.000399648	0.000799297	0.000879226	0.006634162	7.99E-05	0.000559508	0.000799297
10	OTU_17	Proteobacteria	Gammaproteobacteria	Enterobacteriales	Enterobacteriaceae	/		0.000879226	7.99E-05	0.032771161	0.004236272	0	0.001358804	0.007753177	0.000159859	0	0	0.003197186	0.008152826	0.002957397	0.001518664	0.002238031	0.000879226	0.000159859	0.001678523	0.001039086
11	OTU_18	Proteobacteria	Betaproteobacteria	Burkholderiales	Comamonadaceae	Variovorax	Variovorax_paradoxus	0	0	0.000639437	0	0.000639437	0.00247782	0.003756694	0.007433459	0.043961314	0.021820798	0.003516905	0.005115498	0.009032052	0.000719367	0.003996483	0.036288067	0.000239789	0.005035569	0.003197186
12	OTU_20	Proteobacteria	Alphaproteobacteria	Sphingomonadales	Sphingomonadaceae	Sphingomonas		0.015426425	0.015266565	0.034609544	0.008392614	0.008472544	0.003197186	0.003117257	0.005275358	0.056190552	0.005834865	0.00231796	0.002717609	0.008872192	0.004236272	0.004156342	0.07801135	0.009911278	0.004555991	0.001198945
13	OTU_23	Proteobacteria	Betaproteobacteria	Burkholderiales	Oxalobacteraceae	Massilia		0	0.004955639	0	0	0.000399648	0.001998242	0.000399648	0.001119015	0.019582767	0.005515147	0.001598593	0.001278875	0.002238031	0.000879226	0.002557749	0.005754936	0.000159859	0.000399648	0.005994725
14	OTU_24	Firmicutes	Bacilli	Bacillales	Bacillaceae	Bacillus		0	0	0	0.001918312	0.006234514	0	0.002557749	0.001438734	0	0.001918312	0.080569099	0.069458876	0.061146191	0.009111981	0.004156342	0.006314443	7.99E-05	0.013268324	0.003357046
15	OTU_28	Actinobacteria	unidentified	Propionibacteriales	Propionibacteriaceae	Propionibacterium		0.012069379	0.046039485	0.028135241	0.003436975	0.008952122	0.012548957	0.069219087	0.092878267	0.005195428	0.024858125	0.008392614	0.007353529	0.016865159	0.004156342	0.002238031	0.001598593	0.001198945	0.00719367	0.001678523
16	OTU_2869	Proteobacteria	Gammaproteobacteria	Enterobacteriales	Enterobacteriaceae	/		0.01406762	0.000719367	0.002238031	0.000959156	0	0.002078171	0.009591559	0.003756694	7.99E-05	0.000719367	0.005834865	0.001598593	0.001039086	0.001198945	0.006714092	0.000239789	0.000159859	0.004476061	0.000639437
17	OTU_29	Proteobacteria	Gammaproteobacteria	Pseudomonadales	Moraxellaceae	Acinetobacter		0.008632403	0.005195428	0.001838382	0.001438734	0.004236272	0.100471585	0.040764128	0.015826073	0.002238031	0.005035569	0.001678523	0.001198945	0.000159859	0.000399648	0.000239789	0	0.007593318	0.000319719	0.001758453
18	OTU_3	Proteobacteria	Betaproteobacteria	Burkholderiales	Oxalobacteraceae	/		7.99E-05	0.017584526	0.000559508	0.004156342	0.005595076	0.043162017	0.005435217	0.00471585	0.015906003	0.005115498	0.061785629	0.016385581	0.006554232	0.003996483	0.013588043	0.02357925	0.002877468	0.005275358	0.003516905
19	OTU_30	Proteobacteria	Betaproteobacteria	Burkholderiales	Comamonadaceae	Pelomonas		0.030133483	0.001119015	0.024218688	0.001438734	0.003357046	0.004076413	0.002797538	0.01902326	0.00463592	0.033330669	0.003916553	0.000959156	0.003117257	0.004396131	0.006474303	7.99E-05	7.99E-05	0.001838382	7.99E-05
20	OTU_31	Actinobacteria	unidentified	Corynebacteriales	Mycobacteriaceae	Mycobacterium		0	0	0	0.002957397	0	0.001358804	0.007913037	0.023339461	0.004555991	0.028774678	0.005035569	0.025657421	0.011190153	0.006074654	0.027016226	0.015186636	0.011190153	0.00951163	0.002078171
21	OTU_33	Proteobacteria	Alphaproteobacteria	Sphingomonadales	Sphingomonadaceae	Sphingomonas	Sphingomos_echinoides	0	0.012788746	0.039165534	0.001998242	0.004076413	0.000319719	0.009591559	0.011509871	0.005195428	0.006394373	0.00231796	0.000719367	0.00719367	0.004955639	0.000879226	0.000319719	0.003756694	0.002637679	0.000319719
22	OTU_36	Proteobacteria	Alphaproteobacteria	Rhizobiales	Bradyrhizobiaceae	Bradyrhizobium	Bradyrhizobium_elkanii	0.008392614	0.000159859	0	0	0.004236272	0	0.005834865	0.003996483	0.000399648	0	0.003277116	0.004236272	0.011270082	0.008712333	0.008392614	0.003836624	0.005994725	0.001119015	0.000159859
23	OTU_38	Actinobacteria	unidentified	Micrococcales	Micrococcaceae	Kocuria	Kocuria_rosea	0.013747902	0.000159859	0.042362721	0.008872192	0.000639437	0	0.001198945	0.121093438	0.001598593	7.99E-05	0.000799297	7.99E-05	0.000159859	0	0	0.002078171	0.000159859	0	0.000399648
24	OTU_4	Proteobacteria	Alphaproteobacteria	Caulobacterales	Caulobacteraceae	Brevundimonas	Brevundimos_diminuta	0.141075853	0.228838622	0.165933978	0.155463192	0.192630485	0.04484054	0.129885701	0.251218927	0.149228679	0.168811446	0.236751659	0.293421789	0.194388938	0.208936136	0.541043881	0.092478619	0.153385021	0.18207977	0.026136999
25	OTU_4063	Proteobacteria	Gammaproteobacteria	Pseudomonadales	Pseudomonadaceae	Pseudomonas		0.003916553	0.014946847	0	0.000479578	0.007593318	0.015985932	0.03069299	0.003357046	0	0	0.001358804	0.000799297	0.000879226	0.038206378	0.000799297	0.000159859	0.000159859	0.000479578	0.003277116
26	OTU_4308	Proteobacteria	Alphaproteobacteria	/	/	/		0.003596835	0.008632403	0.000719367	0.003436975	0.004236272	0.001278875	0.003516905	0.005355287	0.004396131	0.00479578	0.013268324	0.015106706	0.005994725	0.003277116	0.014866917	0.002158101	0.000959156	0.006074654	0.001039086
27	OTU_5	Proteobacteria	Betaproteobacteria	Burkholderiales	Oxalobacteraceae	Duganella		7.99E-05	7.99E-05	0	0.001278875	0.000159859	0.068979298	0.05427224	0.007913037	0.045160259	0.077291983	0.041963072	0.017824315	0.00471585	0.007433459	0.011350012	0.023099672	0.000399648	0.001758453	0.000559508
28	OTU_524	Proteobacteria	Alphaproteobacteria	Sphingomonadales	Sphingomonadaceae	Sphingomonas	Sphingomos_aerolata	0	0	0	7.99E-05	0	0.005435217	0.000239789	0	0.063224363	0.001678523	0.009032052	0.005275358	0.01414755	0.001039086	0.003596835	0.3026137	0.004076413	0.039325394	0.006154584
29	OTU_6	Proteobacteria	Betaproteobacteria	Burkholderiales	Alcaligenaceae	/		0.062824714	0.09703461	0.249300615	0.031812005	0.066661338	0.025497562	0.084805371	0.042682439	0.011429942	0.036607785	0.012708816	0.013028535	0.036527855	0.027815522	0.032931021	0.015985932	0.103349053	0.035808489	0.002238031
30	OTU_60	Firmicutes	Bacilli	Bacillales	Staphylococcaceae	Staphylococcus	Staphylococcus_epidermidis	0.006314443	0.027495804	0.00719367	0.005834865	0.000159859	7.99E-05	0.020861642	0.016705299	0.004875709	0.010950364	0.010870434	0.003197186	0.007273599	0.002158101	0.006394373	0.000639437	0.011030293	0.005195428	0.003197186
31	OTU_61	Proteobacteria	Betaproteobacteria	Burkholderiales	Oxalobacteraceae	Massilia		0	0.00719367	0	0	0	0.002557749	0.007833107	0.003117257	0.010710575	0.007273599	0.004396131	0.000879226	0.001838382	0.000239789	0.000559508	0.003037327	0.005675006	0.000239789	0.003516905
32	OTU_7	Proteobacteria	Gammaproteobacteria	Pseudomonadales	Pseudomonadaceae	Pseudomonas		0.013348254	0.015826073	7.99E-05	0.005195428	0.053872592	0.182958996	0.056190552	0.025417632	0.018463752	0.06610183	0.021900727	0.062584925	0.035089122	0.305491168	0.022460235	0.046199345	0.037007433	0.038046519	0.013108465
33	OTU_77	Actinobacteria	unidentified	Corynebacteriales	Corynebacteriaceae	Corynebacterium_1	Corynebacterium_tuberculostearicum	0.021101431	0.001198945	0.015746143	0.000879226	0	0.00471585	0.003516905	0.012309168	0.002158101	0	0.002637679	0.000319719	0.000639437	0.004316202	0.000239789	0	0.003916553	0.000639437	0.000239789
34	OTU_8	Bacteroidetes	Flavobacteriia	Flavobacteriales	Flavobacteriaceae	Chryseobacterium	Chryseobacterium_shigense	0.202301974	0.092958197	0.078650787	0.009831348	0.101350811	0.000399648	0.006394373	0.001039086	0.006554232	0.000159859	0.003037327	0.003037327	0.00471585	0.001358804	0.002238031	0.002957397	0.000319719	0.002717609	0.003357046
35	OTU_9	Proteobacteria	Gammaproteobacteria	Pseudomonadales	Pseudomonadaceae	Pseudomonas	Pseudomos_viridiflava	0.015586284	0	0.010950364	0.040923987	0.009191911	0.231875949	0.013907761	0.02597714	0.021980657	0.09463672	0.027176085	0.027895452	0.218927344	0.009831348	0.020302134	0.010950364	0.072975781	0.089521221	0.014866917
36	OTU_96	Proteobacteria	Alphaproteobacteria	Rhizobiales	Bradyrhizobiaceae	Bosea	Bosea_thiooxidans	0.008872192	0	0.005275358	0.003117257	0.010390856	0.001358804	0.004476061	0.003676764	0.002717609	0.010230997	0.002957397	0.005115498	0.008712333	0.003516905	0.006554232	0.001598593	0.000159859	0.003916553	0.000159859
